# Supplementary material for: A tailored phosphoaspartate probe unravels CprR as a response regulator in Pseudomonas aeruginosa interkingdom signaling
Source: Royal Society of Chemistry journal article supplement (doi:10.1039/d0sc06226j), 2021-01-01
Supplement: d0sc06226j2.xlsx [file d0sc06226j2.xlsx]

## Sheet: Table of content
Supplementary_Table_S1
Worksheet	Information
1 PAO1 HA-yne mod.	Identified sites (Asp, Glu, Asn, Gln) modified with HA-yne in P. aeruginosa (PAO1) by analysis with MaxQuant.
2 B. subtilis HA-yne mod.	Identified sites (Asp, Glu, Asn, Gln) modified with HA-yne in B. subtilis by analysis with MaxQuant.
3 PAO1 Dyn HA-yne mod.	Identified sites (Asp, Glu, Asn, Gln) modified with HA-yne in P. aeruginosa w/ and w/o dynorphin A (1-13) pretreatment by analysis with MaxQuant.
4 PAO1 isoDTB quant. 1 min Dyn	Quantification of identified sites (Asp, Glu) modified with HA-yne in P. aeruginosa w/ (light isoDTB tag) and w/o (heavy isoDTB tag) dynorphin A (1-13) pretreatment (1 min) by analysis with MaxQuant.
5 PAO1 isoDTB quant. 1 min Dyn	Quantification of identified sites (Asp, Glu) modified with HA-yne in P. aeruginosa w/ (light isoDTB tag) and w/o (heavy isoDTB tag) dynorphin A (1-13) pretreatment (30 min) by analysis with MaxQuant.
Column header	Information
Uniprot entry	Identifiers of the Uniprot entry the HA-yne modified peptide is associated with.
Gene name (ordered locus )	Identifiers of the gene's ordered locus the HA-yne modified peptide is associated with.
Gene name	Identifiers of genes the HA-yne modified peptide is associated with.
Protein name	Identifiers of proteins the HA-yne modified peptide is associated with.
Protein abundance (within top x%)	Protein abundances were categorized by their ranks (in steps of 10% from 10% (highest abundance) to 100% (lowest abundance)) according to the PaxDb database. #NV indicates, that there was no value determined for the respective protein according to the PaxDb database. For further information see Supplementary_Information.docx.
pAsp	Indication, if the identified peptide corresponds to an "aspartylphosphate" annotated protein from Uniprot.
Ann. site	Position of the "aspartylphosphate" annotated site from Uniprot in the respective protein sequence.
Mod. site	Position of the HA-yne modified site in the respective protein sequence.
Localization prob.	Andromeda localization probability of the best identified modified peptide containing the HA-yne modified site.
Score	Andromeda score of the best identified modified peptide containing the HA-yne modified site.
Amino acid	HA-yne modified residue.
ID type	Type of identification the corresponding modified residue was modified.
Sequence	Sequence of the identified peptide (If several peptides were combined for the same residue, the shortest sequence is given.). * indicates the HA-yne modified site with the probe and the isoDTB tag.
log2 (ratio L/H)	log2 of the ratio between peptides bearing the light and heavy isoDTB tag (L/H). Roman numerals indicate the biological replicate. C indicates the soluble fraction, M the insoluble fraction.
Median log2 (ratio L/H)	Median of the log2 of all individual L/H ratios.
Median ratio L/H	Median of the ratio of all individual L/H ratios.
Neg. log10 (p)	Result of a one-sample t-test (-log10 (p)) testing the probability that the value of log2 (ratio L/H) is equal to 0.
	Additional Information
	"HA-yne modification" indicates the modification of peptides, which were labeled with HA-yne and "clicked" to either desthiobiotin azide (worksheet 1-3) or the isoDTB tags (worksheet 4 and 5). For further information see the Supplementary Information.

## Sheet: 1 PAO1 HA-yne mod.
Uniprot entry	Gene name (ordered locus )	Gene name	Protein name	Protein abundance (within top x%)	pAsp	Ann. site	Mod. site	Localization prob.	Score	Amino acid
Q9HT62	PA5511	mifR	MifR	#N/A	pAsp	53	53	1	160.36	D
Q51373	PA2586	gacA	Response regulator GacA	0.7	pAsp	54	54	1	107.65	D
Q9HU59	PA5125	ntrC	Two-component response regulator NtrC	1	pAsp	55	55	1	115.78	D
Q9HWI5	PA4196	bfiR	BfiR	#N/A	pAsp	57	57	1	131.06	D
Q9HWR8	PA4112	PA4112	Histidine kinase	1	pAsp	1064, 1210	1064	1	73.781	D
Q00934	PA4547	pilR	Type 4 fimbriae expression regulatory protein PilR	0.4	pAsp	11, 54	54	1	219.7	D
P46384	PA0408	pilG	Protein PilG	0.9	pAsp	58	58	0.999999	81.317	D
G3XD98	PA0928	gacS	Histidine kinase	0.7	pAsp	715	715	0.999988	136.93	D
Q9HVS8	PA4493	roxR	RoxR	0.4	pAsp	63	63	0.999963	144.27	D
P23747	PA5483	algB	Alginate biosynthesis transcriptional regulatory protein AlgB	0.5	pAsp	59	59	0.999947	62.408	D
Q9HTY9	PA5200	amgR	AmgR	0.5	pAsp	61	61	0.999939	97.776	D
Q9HV73	PA4726	cbrB	Two-component response regulator CbrB	0.5	pAsp	52	52	0.999661	64.675	D
Q9I495	PA1243	PA1243	Probable sensor/response regulator hybrid	0.9	pAsp	793	793	0.999184	73.279	D
Q9I4F9	PA1179	phoP	Two-component response regulator PhoP	0.3	pAsp	51	51	0.999167	69.981	D
Q9HUV7	PA4856	retS	RetS (Regulator of Exopolysaccharide and Type III Secretion)	0.6	pAsp	713, 858	713	0.991557	99.407	D
Q9HXD3	PA3879	narL	Two-component response regulator NarL	#N/A	pAsp	64	64	0.990275	40.493	D
Q9I696	PA0413	chpA	Component of chemotactic signal transduction system	0.3	pAsp	2401	2401	0.979492	122.78	D
Q9I045	PA2798	PA2798	Probable two-component response regulator	0.3	pAsp	56	56	0.896231	62.677	D
Q9I4F9	PA1179	phoP	Two-component response regulator PhoP	0.3	pAsp	51	86	0.855082	51.296	D
Q9HWD2	PA4266	fusA	Elongation factor G 1	0.05			327;328	1	59.248	D
O50175	PA0899	astB	N-succinylarginine dihydrolase	0.4			448	1	171.73	D
O82850	PA3656	rpsB	30S ribosomal protein S2	0.05			127	1	115.31	D
P04739	PA4525	pilA	Fimbrial protein	0.05			139	1	57.55	D
P05384	PA1804	hupB	DNA-binding protein HU-beta	0.05			40	1	69.485	D
P08308	PA5172	arcB	Ornithine carbamoyltransferase, catabolic	0.05			335	1	47.198	D
P09591	PA4265; PA4277	tufA	Elongation factor Tu	0.05			48	1	164.65	D
P09591	PA4265; PA4277	tufA	Elongation factor Tu	0.05			38	1	122.94	D
P13981	PA5171	arcA	Arginine deiminase	0.05			166	1	58.577	D
P33663	PA4543	PA4543	Polyphenol oxidase	1			242	1	51.736	D
P53593	PA1588	sucC	Succinate--CoA ligase [ADP-forming] subunit beta	0.05			150	1	108.32	D
Q51342	PA3108	purF	Amidophosphoribosyltransferase	0.2			501	1	156.52	D
Q9HT18	PA5556	atpA	ATP synthase subunit alpha	0.05			182	1	96.604	D
Q9HVC5	PA4670	prs	Ribose-phosphate pyrophosphokinase	0.05			14	1	60.345	D
Q9HVL6	PA4568	rplU	50S ribosomal protein L21	0.05			26	1	141.08	D
Q9HWC6	PA4273	rplA	50S ribosomal protein L1	0.05			93	1	105.67	D
Q9HWC9	PA4269	rpoC	DNA-directed RNA polymerase subunit beta'	0.05			571	1	53.968	D
Q9HWD6	PA4262	rplD	50S ribosomal protein L4	0.05			138	1	102.72	D
Q9HWE1	PA4257	rpsC	30S ribosomal protein S3	0.05			31	1	108.47	D
Q9HWE4	PA4254	rpsQ	30S ribosomal protein S17	0.05			60	1	68.735	D
Q9HWF1	PA4247	rplR	50S ribosomal protein L18	0.05			56	1	76.143	D
Q9HZP8	PA2950	fabV	Enoyl-[acyl-carrier-protein] reductase [NADH]	0.2			133	1	52.495	D
Q9I138	PA2444	glyA2	Serine hydroxymethyltransferase 2	0.8			418	1	98.03	D
Q9I2Q2	PA1843	metH	Methionine synthase	0.4			7	1	47.823	D
Q9I3D1	PA1587	lpdG	Dihydrolipoyl dehydrogenase	0.05			319	1	45.434	D
Q9I4Z4	PA0973	pal	Peptidoglycan-associated lipoprotein	0.1			85	1	80.462	D
Q9I685	PA0432	ahcY	Adenosylhomocysteinase	0.05			292	1	130.56	D
Q9I6E0	PA0353	ilvD	Dihydroxy-acid dehydratase	0.2			123	1	181.37	D
Q9LCT3	PA4403	secA	Protein translocase subunit SecA	0.1			916	1	66.692	D
A0A0F7L1R6	0	tnpR	TnpR	#N/A			33	1	46.001	D
Q9HUD3	PA5046	PA5046	Malic enzyme	0.05			310	1	89.548	D
Q9HUE0	PA5029	PA5029	Probable transcriptional regulator	#N/A			76	1	55.504	D
Q9HVR8	PA4503	PA4503	Probable permease of ABC transporter	0.4			293	1	59.35	D
Q9HVY4	PA4431	PA4431	Ubiquinol-cytochrome c reductase iron-sulfur subunit	0.05			58	1	81.431	D
Q9HWA9	PA4291	PA4291	Uncharacterized protein	#N/A			118	1	42.095	D
Q9HY81	PA3529	PA3529	Probable peroxidase	0.05			144	1	51.218	D
Q9HYT5	PA3309	PA3309	Uncharacterized protein	0.05			16	1	105.65	D
Q9HZP2	PA2956	PA2956	Uncharacterized protein	#N/A			270	1	40.268	D
Q9I0K3	PA2635	PA2635	Uncharacterized protein	#N/A			467	1	53.493	D
Q9I0Z1	PA2491	PA2491	Probable oxidoreductase	0.05			339	1	137.5	D
Q9I1Q4	PA2213	PA2213	Probable porin	#N/A			261	1	44.803	D
Q9I578	PA0863	PA0863	Probable oxidoreductase	#N/A			7	1	45.718	D
Q9I5H2	PA0757	PA0757	Probable two-component sensor	#N/A			170	1	58.782	D
Q9I6H5	PA0316	serA	D-3-phosphoglycerate dehydrogenase	0.1			7	1	40.778	D
Q9HWC6	PA4273	rplA	50S ribosomal protein L1	0.05			108	0.999999	132.64	D
Q9HWF7	PA4241	rpsM	30S ribosomal protein S13	0.1			47	0.999999	116.63	D
Q9HXI7	PA3815	iscR	HTH-type transcriptional regulator IscR	0.5			163	0.999999	78.556	D
Q9I4I2	PA1155	nrdB	Ribonucleoside-diphosphate reductase subunit beta	0.4			415	0.999999	70.552	D
P30718	PA4385	groL	60 kDa chaperonin	0.05			140	0.999998	66.267	D
P09591	PA4265; PA4277	tufA	Elongation factor Tu	0.05			340	0.999997	146.19	D
P13794	PA1777	oprF	Outer membrane porin F	0.05			258	0.999995	103.08	D
Q9I5A4	PA0836	ackA	Acetate kinase	0.3			394	0.999994	55.806	D
Q51567	PA1589	sucD	Succinate--CoA ligase [ADP-forming] subunit alpha	0.05			80	0.999993	63.091	D
P05384	PA1804	hupB	DNA-binding protein HU-beta	0.05			26	0.99999	64.675	D
Q9I0L4	PA2624	idh	Isocitrate dehydrogenase	0.1			424	0.999986	81.338	D
Q9HVZ0	PA4425	gmhA	Phosphoheptose isomerase	0.5			57	0.999982	56.247	D
Q9HYD5	PA3471	maeA	NAD-dependent malic enzyme	0.2			37	0.999979	60.036	D
P09591	PA4265; PA4277	tufA	Elongation factor Tu	0.05			200	0.999974	206.97	D
Q9I0M2	PA2616	trxB1	Thioredoxin reductase	0.1			250	0.999974	53.028	D
Q9I0A4	PA2739	pheT	Phenylalanine--tRNA ligase beta subunit	0.2			299	0.99997	49.448	D
Q9HU65	PA5119	glnA	Glutamine synthetase	0.1			234	0.999965	124.98	D
Q9HWC5	PA4274	rplK	50S ribosomal protein L11	0.05			116	0.999958	68.168	D
Q9HV69	PA4730	panC	Pantothenate synthetase	0.5			283	0.999957	69.276	D
P09591	PA4265; PA4277	tufA	Elongation factor Tu	0.05			100	0.999949	73.676	D
Q9HWD6	PA4262	rplD	50S ribosomal protein L4	0.05			183	0.999949	59.513	D
Q9HWE9	PA4249	rpsH	30S ribosomal protein S8	0.2			5	0.999945	63.662	D
Q9HV43	PA4761	dnaK	Chaperone protein DnaK	0.05			238	0.999942	59.57	D
Q9I3L8	PA1494	PA1494	Uncharacterized protein	0.4			551	0.999929	41.502	D
Q9HW32	PA4370	icmP	Insulin-cleaving metalloproteinase outer membrane protein	0.05			374	0.999927	83.948	D
Q9HT18	PA5556	atpA	ATP synthase subunit alpha	0.05			492	0.999905	69.864	D
Q9I4W3	PA1010	dapA	4-hydroxy-tetrahydrodipicolinate synthase	0.3			98	0.999898	46.678	D
P09591	PA4265; PA4277	tufA	Elongation factor Tu	0.05			71	0.999896	153.23	D
P30720	PA4386	groS	10 kDa chaperonin	0.1			50	0.999881	107.66	D
P30718	PA4385	groL	60 kDa chaperonin	0.05			432	0.999879	117.7	D
Q9HV43	PA4761	dnaK	Chaperone protein DnaK	0.05			627	0.999866	174.4	D
P57112	PA2991	sthA	Soluble pyridine nucleotide transhydrogenase	0.1			343	0.999828	49.793	D
Q9I4P8	PA1081	flgF	Flagellar basal-body rod protein FlgF	#N/A			141	0.999774	48.044	D
Q9HVY2	PA4433	rplM	50S ribosomal protein L13	0.05			19	0.999743	58.885	D
P30718	PA4385	groL	60 kDa chaperonin	0.05			64	0.999731	67.997	D
Q9HWD6	PA4262	rplD	50S ribosomal protein L4	0.05			170	0.999713	50.188	D
Q9HWC6	PA4273	rplA	50S ribosomal protein L1	0.05			195	0.999691	78.401	D
Q9HUM6	PA4938	purA	Adenylosuccinate synthetase	0.2			334	0.999604	51.286	D
Q51561	PA4270	rpoB	DNA-directed RNA polymerase subunit beta	0.05			733	0.999562	46.378	D
Q9HWE9	PA4249	rpsH	30S ribosomal protein S8	0.2			9	0.999455	49.298	D
Q9HWE1	PA4257	rpsC	30S ribosomal protein S3	0.05			36	0.999425	53.237	D
P09591	PA4265; PA4277	tufA	Elongation factor Tu	0.05			211	0.999354	42.711	D
Q9HWW1	PA4067	oprG	Outer membrane protein OprG	0.05			42	0.999188	77.959	D
Q9HT18	PA5556	atpA	ATP synthase subunit alpha	0.05			459	0.999162	86.136	D
Q9HWD2	PA4266	fusA	Elongation factor G 1	0.05			526	0.999123	112.11	D
Q9I5Y1	PA0555	fba	Fructose-bisphosphate aldolase	0.1			277	0.999038	70.942	D
Q9I3B2	PA1609	fabB	Beta-ketoacyl-ACP synthase I	0.05			287	0.998961	58.565	D
P53593	PA1588	sucC	Succinate--CoA ligase [ADP-forming] subunit beta	0.05			26	0.998951	62.055	D
Q9HZP8	PA2950	fabV	Enoyl-[acyl-carrier-protein] reductase [NADH]	0.2			332	0.99886	101.3	D
Q9I3D1	PA1587	lpdG	Dihydrolipoyl dehydrogenase	0.05			214	0.998802	120.59	D
Q9HWG4	PA4225	pchF	Pyochelin synthetase	0.2			1098	0.998791	46.606	D
Q9HT18	PA5556	atpA	ATP synthase subunit alpha	0.05			290	0.99868	47.621	D
Q9HWW1	PA4067	oprG	Outer membrane protein OprG	0.05			49	0.998496	167.3	D
P09591	PA4265; PA4277	tufA	Elongation factor Tu	0.05			51	0.99843	80.318	D
Q9HWF2	PA4246	rpsE	30S ribosomal protein S5	0.05			9	0.998174	109.66	D
Q51561	PA4270	rpoB	DNA-directed RNA polymerase subunit beta	0.05			347	0.998132	117.07	D
Q9I747	PA0085	hcp1	Protein hcp1	0.3			11	0.998101	58.699	D
Q9HWD2	PA4266	fusA	Elongation factor G 1	0.05			51	0.998095	60.134	D
Q9HWE1	PA4257	rpsC	30S ribosomal protein S3	0.05			181	0.997859	128.32	D
Q9HWD1	PA4267	rpsG	30S ribosomal protein S7	0.05			57	0.997823	51.013	D
P30718	PA4385	groL	60 kDa chaperonin	0.05			487	0.997564	70.451	D
Q9HVY3	PA4432	rpsI	30S ribosomal protein S9	0.05			91	0.997139	128.12	D
Q9I0E4	PA2698	PA2698	Probable hydrolase	#N/A			19	0.996884	43.728	D
Q9HWD2	PA4266	fusA	Elongation factor G 1	0.05			107	0.995375	54.235	D
P08280	PA3617	recA	Protein RecA	0.1			346	0.995185	111.34	D
Q9I3C5	PA1596	htpG	Chaperone protein HtpG	0.05			493	0.99452	100.94	D
Q9I3C5	PA1596	htpG	Chaperone protein HtpG	0.05			314	0.994334	72.615	D
Q9I0A2	PA2741	rplT	50S ribosomal protein L20	0.05			91	0.994034	67.897	D
P30718	PA4385	groL	60 kDa chaperonin	0.05			196	0.993931	69.152	D
Q9HWD6	PA4262	rplD	50S ribosomal protein L4	0.05			175	0.993713	84.297	D
Q9HZM8	PA2976	rne	Ribonuclease E	0.05			223	0.993434	121.21	D
Q9I401	PA1343	PA1343	Uncharacterized protein	0.9			84	0.992472	58.676	D
Q51561	PA4270	rpoB	DNA-directed RNA polymerase subunit beta	0.05			1256	0.991063	91.265	D
Q9I2U2	PA1800	tig	Trigger factor	0.05			408	0.989885	51.643	D
P53593	PA1588	sucC	Succinate--CoA ligase [ADP-forming] subunit beta	0.05			139	0.989373	74.301	D
Q9I002	PA2841	PA2841	Probable enoyl-CoA hydratase/isomerase	0.3			244	0.988109	40.045	D
Q9I4P0	PA1089	PA1089	Uncharacterized protein	#N/A			8	0.988044	48.527	D
Q9HT20	PA5554	atpD	ATP synthase subunit beta	0.05			334	0.987628	93.753	D
Q9HWF4	PA4244	rplO	50S ribosomal protein L15	0.05			144	0.985857	105.65	D
Q9I2W9	PA1770	ppsA	Phosphoenolpyruvate synthase	0.05			381	0.985813	60.434	D
Q9HWE5	PA4253	rplN	50S ribosomal protein L14	0.05			9	0.985786	58.164	D
Q59636	PA3807	ndk	Nucleoside diphosphate kinase	0.1			112	0.985353	134.34	D
Q9HZ71	PA3162	rpsA	30S ribosomal protein S1	0.05			73	0.984899	66.045	D
Q9HVC4	PA4671	rplY	50S ribosomal protein L25	0.05			150	0.984354	86.344	D
P11221	PA2853	oprI	Major outer membrane lipoprotein	0.05			53	0.982941	78.516	D
Q9HV43	PA4761	dnaK	Chaperone protein DnaK	0.05			579	0.981092	85.813	D
P53593	PA1588	sucC	Succinate--CoA ligase [ADP-forming] subunit beta	0.05			36	0.979312	85.734	D
Q9HWW1	PA4067	oprG	Outer membrane protein OprG	0.05			44	0.977077	144.27	D
Q9HXJ3	PA3804	PA3804	Uncharacterized protein	0.3			78	0.975496	111.24	D
Q9HWE7	PA4251	rplE	50S ribosomal protein L5	0.05			56	0.973939	123.51	D
Q9HZP6	PA2952	etfB	Electron transfer flavoprotein subunit beta	0.05			90	0.971886	92.38	D
P30720	PA4386	groS	10 kDa chaperonin	0.1			97	0.971477	79.013	D
Q9HT21	PA5553	atpC	ATP synthase epsilon chain	0.1			89	0.968849	41.967	D
P09591	PA4265; PA4277	tufA	Elongation factor Tu	0.05			156	0.968661	42.269	D
Q9HT14	PA5560	atpB	ATP synthase subunit a	0.3			139	0.965768	60.102	D
Q9HV43	PA4761	dnaK	Chaperone protein DnaK	0.05			624	0.965497	193.32	D
P30718	PA4385	groL	60 kDa chaperonin	0.05			341	0.963311	100.07	D
P09591	PA4265; PA4277	tufA	Elongation factor Tu	0.05			220	0.961236	74.505	D
P30718	PA4385	groL	60 kDa chaperonin	0.05			359	0.958175	112.17	D
Q9HZ71	PA3162	rpsA	30S ribosomal protein S1	0.05			356	0.950232	54.004	D
P53593	PA1588	sucC	Succinate--CoA ligase [ADP-forming] subunit beta	0.05			105	0.930889	142.85	D
Q9HZ71	PA3162	rpsA	30S ribosomal protein S1	0.05			525	0.913619	76.357	D
Q9XCX9	PA0770	rnc	Ribonuclease 3	1			229	0.905443	69.922	D
O82850	PA3656	rpsB	30S ribosomal protein S2	0.05			188	0.904043	50.294	D
Q9HWC5	PA4274	rplK	50S ribosomal protein L11	0.05			123	0.901067	54.95	D
O52759	PA4239	rpsD	30S ribosomal protein S4	0.05			190	0.898254	43.696	D
Q9HYC8	PA3481	PA3481	Iron-sulfur cluster carrier protein	0.2			364	0.883111	67.456	D
Q9HV43	PA4761	dnaK	Chaperone protein DnaK	0.05			526	0.877647	59.542	D
Q51561	PA4270	rpoB	DNA-directed RNA polymerase subunit beta	0.05			451	0.877447	53.252	D
Q9I3C5	PA1596	htpG	Chaperone protein HtpG	0.05			471	0.8717	60.209	D
Q9HWF7	PA4241	rpsM	30S ribosomal protein S13	0.1			50	0.870844	79.614	D
Q9I3C5	PA1596	htpG	Chaperone protein HtpG	0.05			223	0.862469	115.56	D
O82851	PA3655	tsf	Elongation factor Ts	0.05			143	0.8606	59.116	D
Q9HV96	PA4701	PA4701	Uncharacterized protein	0.2			215	0.84947	86.016	D
P09591	PA4265; PA4277	tufA	Elongation factor Tu	0.05			167	0.848812	117.81	D
Q51561	PA4270	rpoB	DNA-directed RNA polymerase subunit beta	0.05			449	0.840422	42.209	D
P34750	PA5040	pilQ	Fimbrial assembly protein PilQ	0.2			96	0.838627	46.462	D
P09591	PA4265; PA4277	tufA	Elongation factor Tu	0.05			166	0.838396	128.14	D
Q9HW32	PA4370	icmP	Insulin-cleaving metalloproteinase outer membrane protein	0.05			255	0.831149	40.179	D
Q51561	PA4270	rpoB	DNA-directed RNA polymerase subunit beta	0.05			1255	0.830515	71.614	D
Q9HWW1	PA4067	oprG	Outer membrane protein OprG	0.05			216	0.829358	57.288	D
Q9I4Z4	PA0973	pal	Peptidoglycan-associated lipoprotein	0.1			154	0.817483	40.085	D
Q9HZ71	PA3162	rpsA	30S ribosomal protein S1	0.05			289	0.81259	60.728	D
P08308	PA5172	arcB	Ornithine carbamoyltransferase, catabolic	0.05			196	0.809689	51.569	D
Q9HZ71	PA3162	rpsA	30S ribosomal protein S1	0.05			423	0.808762	43.955	D
Q59637	PA5015	aceE	Pyruvate dehydrogenase E1 component	0.05			3	0.790679	45.957	D
P13981	PA5171	arcA	Arginine deiminase	0.05			38	0.790275	97.384	D
O52760	PA4238	rpoA	DNA-directed RNA polymerase subunit alpha	0.05			198	0.78671	47.281	D
Q59636	PA3807	ndk	Nucleoside diphosphate kinase	0.1			120	0.785696	92.29	D
Q9I3D4	PA1584	sdhB	Succinate dehydrogenase (B subunit)	0.05			195	0.781064	49.025	D
Q9HZ71	PA3162	rpsA	30S ribosomal protein S1	0.05			239	0.775068	70.802	D
Q9HT20	PA5554	atpD	ATP synthase subunit beta	0.05			117	0.774981	40.81	D
Q9HV43	PA4761	dnaK	Chaperone protein DnaK	0.05			580	0.770978	74.962	D
Q9HWE7	PA4251	rplE	50S ribosomal protein L5	0.05			144	0.770721	58.246	D
Q9HT45	PA5528	PA5528	Uncharacterized protein	0.3			223	0.751137	43.801	D
Q51455	PA1456	cheY	Chemotaxis protein CheY	#N/A	pAsp	52	84	1	63.727	E
Q9I495	PA1243	PA1243	Probable sensor/response regulator hybrid	0.9	pAsp	793	205	0.999005	76.035	E
Q51561	PA4270	rpoB	DNA-directed RNA polymerase subunit beta	0.05			239	1	103.44	E
Q51567	PA1589	sucD	Succinate--CoA ligase [ADP-forming] subunit alpha	0.05			160	1	122.52	E
Q9HT18	PA5556	atpA	ATP synthase subunit alpha	0.05			469	1	89.26	E
Q9HT20	PA5554	atpD	ATP synthase subunit beta	0.05			168	1	94.281	E
Q9HT20	PA5554	atpD	ATP synthase subunit beta	0.05			227	1	64.55	E
Q9HUM9	PA4935	rpsF	30S ribosomal protein S6	0.05			65	1	105.65	E
Q9HUN2	PA4932	rplI	50S ribosomal protein L9	0.1			148	1	136.94	E
Q9HUN2	PA4932	rplI	50S ribosomal protein L9	0.1			2	1	87.308	E
Q9HV43	PA4761	dnaK	Chaperone protein DnaK	0.05			272	1	149.18	E
Q9HV43	PA4761	dnaK	Chaperone protein DnaK	0.05			28	1	145.72	E
Q9HV59	PA4740	pnp	Polyribonucleotide nucleotidyltransferase	0.05			302	1	99.442	E
Q9HV59	PA4740	pnp	Polyribonucleotide nucleotidyltransferase	0.05			348	1	104.21	E
Q9HV59	PA4740	pnp	Polyribonucleotide nucleotidyltransferase	0.05			331	1	79.116	E
Q9HVC4	PA4671	rplY	50S ribosomal protein L25	0.05			172	1	124.81	E
Q9HVC4	PA4671	rplY	50S ribosomal protein L25	0.05			155	1	125.28	E
Q9HVL6	PA4568	rplU	50S ribosomal protein L21	0.05			55	1	49.472	E
Q9HVY2	PA4433	rplM	50S ribosomal protein L13	0.05			31	1	73.039	E
Q9HVY2	PA4433	rplM	50S ribosomal protein L13	0.05			9	1	56.205	E
Q9HVY3	PA4432	rpsI	30S ribosomal protein S9	0.05			89	1	186.16	E
Q9HWC6	PA4273	rplA	50S ribosomal protein L1	0.05			32	1	65.465	E
Q9HWC9	PA4269	rpoC	DNA-directed RNA polymerase subunit beta'	0.05			28	1	51.445	E
Q9HWC9	PA4269	rpoC	DNA-directed RNA polymerase subunit beta'	0.05			889	1	96.492	E
Q9HWC9	PA4269	rpoC	DNA-directed RNA polymerase subunit beta'	0.05			913	1	130.14	E
Q9HWD2	PA4266	fusA	Elongation factor G 1	0.05			535	1	111.62	E
Q9HWD5	PA4263	rplC	50S ribosomal protein L3	0.05			55	1	96.331	E
Q9HWD5	PA4263	rplC	50S ribosomal protein L3	0.05			82	1	79.027	E
Q9HWD5	PA4263	rplC	50S ribosomal protein L3	0.05			168	1	64.103	E
Q9HWD5	PA4263	rplC	50S ribosomal protein L3	0.05			176	1	139.15	E
Q9HWD7	PA4261	rplW	50S ribosomal protein L23	0.05			47	1	79.906	E
Q9HWD7	PA4261	rplW	50S ribosomal protein L23	0.05			17	1	81.865	E
Q9HWD8	PA4260	rplB	50S ribosomal protein L2	0.05			194	1	102.52	E
Q9HWD8	PA4260	rplB	50S ribosomal protein L2	0.05			35	1	50.108	E
Q9HWE0	PA4258	rplV	50S ribosomal protein L22	0.05			31	1	48.823	E
Q9HWE1	PA4257	rpsC	30S ribosomal protein S3	0.05			161	1	97.093	E
Q9HWE2	PA4256	rplP	50S ribosomal protein L16	0.05			91	1	115.57	E
Q9HWE4	PA4254	rpsQ	30S ribosomal protein S17	0.05			29	1	66.692	E
Q9HWE5	PA4253	rplN	50S ribosomal protein L14	0.05			120	1	79.146	E
Q9HWE6	PA4252	rplX	50S ribosomal protein L24	0.05			75	1	156.17	E
Q9HWE6	PA4252	rplX	50S ribosomal protein L24	0.05			59	1	83.792	E
Q9HWF0	PA4248	rplF	50S ribosomal protein L6	0.05			147	1	107.79	E
Q9HWF2	PA4246	rpsE	30S ribosomal protein S5	0.05			5	1	77.496	E
Q9HWF2	PA4246	rpsE	30S ribosomal protein S5	0.05			117	1	71.558	E
Q9HWF2	PA4246	rpsE	30S ribosomal protein S5	0.05			152	1	70.256	E
Q9HWF4	PA4244	rplO	50S ribosomal protein L15	0.05			136	1	81.865	E
Q9HWF4	PA4244	rplO	50S ribosomal protein L15	0.05			51	1	66.004	E
Q9HWF8	PA4240	rpsK	30S ribosomal protein S11	0.1			68	1	70.622	E
Q9HXB0	PA3903	prfC	Peptide chain release factor 3	0.5			126	1	69.423	E
Q9HXP9	PA3745	rpsP	30S ribosomal protein S16	0.05			69	1	72.321	E
Q9HXP9	PA3745	rpsP	30S ribosomal protein S16	0.05			47	1	81.904	E
Q9HZ71	PA3162	rpsA	30S ribosomal protein S1	0.05			233	1	77.221	E
Q9HZ71	PA3162	rpsA	30S ribosomal protein S1	0.05			181	1	185.6	E
Q9HZA7	PA3112	accD	Acetyl-coenzyme A carboxylase carboxyl transferase subunit beta	0.3			155	1	113.7	E
Q9HZP6	PA2952	etfB	Electron transfer flavoprotein subunit beta	0.05			57	1	74.698	E
Q9HZZ2	PA2851	efp	Elongation factor P	0.1			125	1	78.903	E
Q9I2U2	PA1800	tig	Trigger factor	0.05			310	1	75.213	E
Q9I3C5	PA1596	htpG	Chaperone protein HtpG	0.05			279	1	67.456	E
Q9I4Z4	PA0973	pal	Peptidoglycan-associated lipoprotein	0.1			118	1	83.948	E
Q9I4Z4	PA0973	pal	Peptidoglycan-associated lipoprotein	0.1			139	1	73.138	E
Q9I6M4	PA0266	davT	5-aminovalerate aminotransferase DavT	0.1			256	1	92.897	E
E1JGJ8	PA3701	prfB	Peptide chain release factor 2	0.6			35	1	44.116	E
G3XD11	PA1178	oprH	PhoP/Q and low Mg2+ inducible outer membrane protein H1	0.05			172	1	45.33	E
Q9HTQ4	PA5300	cycB	Cytochrome c5	0.3			94	1	99.991	E
Q9HUD3	PA5046	PA5046	Malic enzyme	0.05			399	1	44.968	E
Q9HY81	PA3529	PA3529	Probable peroxidase	0.05			71	1	105.77	E
Q9HZP2	PA2956	PA2956	Uncharacterized protein	#N/A			266	1	40.268	E
Q9I1P1	PA2228	PA2228	Uncharacterized protein	#N/A			206	1	65.246	E
Q9I1Q4	PA2213	PA2213	Probable porin	#N/A			262	1	44.803	E
Q9I3B2	PA1609	fabB	Beta-ketoacyl-ACP synthase I	0.05			254	1	109.06	E
Q9I3D5	PA1583	sdhA	Succinate dehydrogenase flavoprotein subunit	0.05			422	1	80.438	E
Q9I5Q4	PA0667	PA0667	Uncharacterized protein	#N/A			128	1	75.738	E
Q9I662	PA0456	PA0456	Probable cold-shock protein	0.1			52	1	68.625	E
Q9I6Z3	PA0139	ahpC	Alkyl hydroperoxide reductase subunit C	0.05			164	1	45.14	E
Q9HWD2	PA4266	fusA	Elongation factor G 1	0.05			623;618	1	108.71	E
O52759	PA4239	rpsD	30S ribosomal protein S4	0.05			35	1	91.549	E
O52759	PA4239	rpsD	30S ribosomal protein S4	0.05			95	1	86.497	E
O52759	PA4239	rpsD	30S ribosomal protein S4	0.05			160	1	68.846	E
O82850	PA3656	rpsB	30S ribosomal protein S2	0.05			175	1	125.5	E
O82851	PA3655	tsf	Elongation factor Ts	0.05			59	1	98.592	E
O82851	PA3655	tsf	Elongation factor Ts	0.05			115	1	101.38	E
O82851	PA3655	tsf	Elongation factor Ts	0.05			130	1	67.169	E
P04739	PA4525	pilA	Fimbrial protein	0.05			38	1	48.823	E
P08308	PA5172	arcB	Ornithine carbamoyltransferase, catabolic	0.05			40	1	60.064	E
P09591	PA4265; PA4277	tufA	Elongation factor Tu	0.05			276	1	77.192	E
P09591	PA4265; PA4277	tufA	Elongation factor Tu	0.05			309	1	162.88	E
P09591	PA4265; PA4277	tufA	Elongation factor Tu	0.05			205	1	143.24	E
P09591	PA4265; PA4277	tufA	Elongation factor Tu	0.05			263	1	77.662	E
P13981	PA5171	arcA	Arginine deiminase	0.05			188	1	53.448	E
P30718	PA4385	groL	60 kDa chaperonin	0.05			427	1	205.9	E
P30718	PA4385	groL	60 kDa chaperonin	0.05			388	1	196.99	E
P30720	PA4386	groS	10 kDa chaperonin	0.1			39	1	83.456	E
Q9HT18	PA5556	atpA	ATP synthase subunit alpha	0.05			461	0.999999	161.27	E
Q9HWD8	PA4260	rplB	50S ribosomal protein L2	0.05			79	0.999999	74.392	E
Q9HWE1	PA4257	rpsC	30S ribosomal protein S3	0.05			188	0.999999	105.79	E
Q9HWE7	PA4251	rplE	50S ribosomal protein L5	0.05			51	0.999999	100.88	E
Q9HWF3	PA4245	rpmD	50S ribosomal protein L30	0.05			36	0.999999	106.66	E
Q9HZP7	PA2951	etfA	Electron transfer flavoprotein subunit alpha	0.05			158	0.999999	134.63	E
P04739	PA4525	pilA	Fimbrial protein	0.05			77	0.999998	90.164	E
P05384	PA1804	hupB	DNA-binding protein HU-beta	0.05			30	0.999998	101.35	E
P13794	PA1777	oprF	Outer membrane porin F	0.05			311	0.999998	139.32	E
Q9I3D3	PA1585	sucA	2-oxoglutarate dehydrogenase (E1 subunit)	0.1			412	0.999997	74.92	E
P13794	PA1777	oprF	Outer membrane porin F	0.05			253	0.999996	96.229	E
P09591	PA4265; PA4277	tufA	Elongation factor Tu	0.05			247	0.999995	150.15	E
Q9HWF0	PA4248	rplF	50S ribosomal protein L6	0.05			42	0.999995	116.86	E
Q9I3P7	PA1465	PA1465	Uncharacterized protein	0.6			67	0.999995	58.815	E
Q9HVT7	PA4484	gatB	Aspartyl/glutamyl-tRNA(Asn/Gln) amidotransferase subunit B	0.2			307	0.999994	76.155	E
Q9HXF5	PA3851	PA3851	Uncharacterized protein	#N/A			91	0.999994	81.338	E
Q9I6Z3	PA0139	ahpC	Alkyl hydroperoxide reductase subunit C	0.05			140	0.999994	95.094	E
Q9HWD2	PA4266	fusA	Elongation factor G 1	0.05			660;655	0.999993	85.176	E
P13794	PA1777	oprF	Outer membrane porin F	0.05			307	0.999991	128.01	E
Q9HZ71	PA3162	rpsA	30S ribosomal protein S1	0.05			3	0.99999	70.373	E
Q9HW49	PA4352	PA4352	Uncharacterized protein	0.1			195	0.99999	82.85	E
Q9HUN2	PA4932	rplI	50S ribosomal protein L9	0.1			110	0.999987	55.755	E
Q9HWC9	PA4269	rpoC	DNA-directed RNA polymerase subunit beta'	0.05			1208	0.999986	99.747	E
Q9HWF3	PA4245	rpmD	50S ribosomal protein L30	0.05			42	0.999986	132.51	E
Q9I2Y5	PA1752	PA1752	2-dehydropantoate 2-reductase	0.5			167	0.999983	67.169	E
Q9I2U2	PA1800	tig	Trigger factor	0.05			232	0.999982	51.606	E
Q9HZ71	PA3162	rpsA	30S ribosomal protein S1	0.05			148	0.99998	61.679	E
Q59636	PA3807	ndk	Nucleoside diphosphate kinase	0.1			53	0.999974	54.784	E
Q9I762	PA0070	PA0070	Uncharacterized protein	0.1			212	0.999973	45.863	E
O52759	PA4239	rpsD	30S ribosomal protein S4	0.05			88	0.99997	47.037	E
Q9HWD2	PA4266	fusA	Elongation factor G 1	0.05			502	0.99997	133.16	E
Q59638	PA5016	aceF	Dihydrolipoyllysine-residue acetyltransferase component of pyruvate dehydrogenase complex	0.1			266	0.999968	120.31	E
Q9HVY4	PA4431	PA4431	Ubiquinol-cytochrome c reductase iron-sulfur subunit	0.05			66	0.999968	50.207	E
Q9HWC6	PA4273	rplA	50S ribosomal protein L1	0.05			85	0.999965	93.776	E
P30718	PA4385	groL	60 kDa chaperonin	0.05			386	0.999961	177.7	E
Q9I149	PA2433	PA2433	Uncharacterized protein	#N/A			52	0.999961	73.248	E
Q9HWE9	PA4249	rpsH	30S ribosomal protein S8	0.2			67	0.99996	59.294	E
Q9I6Z3	PA0139	ahpC	Alkyl hydroperoxide reductase subunit C	0.05			67	0.99996	48.907	E
Q9I3D1	PA1587	lpdG	Dihydrolipoyl dehydrogenase	0.05			206	0.999958	56.482	E
P09591	PA4265; PA4277	tufA	Elongation factor Tu	0.05			180	0.999954	54.681	E
Q9I6Z3	PA0139	ahpC	Alkyl hydroperoxide reductase subunit C	0.05			23	0.999954	80.787	E
Q51567	PA1589	sucD	Succinate--CoA ligase [ADP-forming] subunit alpha	0.05			98	0.999952	80.361	E
Q9HZ71	PA3162	rpsA	30S ribosomal protein S1	0.05			93	0.999948	81.723	E
Q51567	PA1589	sucD	Succinate--CoA ligase [ADP-forming] subunit alpha	0.05			286	0.999938	78.556	E
Q9HZ71	PA3162	rpsA	30S ribosomal protein S1	0.05			187	0.999936	143.31	E
Q51561	PA4270	rpoB	DNA-directed RNA polymerase subunit beta	0.05			1331	0.999933	46.41	E
Q9HXZ4	PA3637	pyrG	CTP synthase	0.1			261	0.999932	80.975	E
Q9I2V5	PA1787	acnB	Aconitate hydratase B	0.05			360	0.999932	44.511	E
P53593	PA1588	sucC	Succinate--CoA ligase [ADP-forming] subunit beta	0.05			355	0.999914	62.408	E
Q9I0L4	PA2624	idh	Isocitrate dehydrogenase	0.1			558	0.99991	54.768	E
Q9HWD2	PA4266	fusA	Elongation factor G 1	0.05			692	0.999907	54.402	E
P13981	PA5171	arcA	Arginine deiminase	0.05			351	0.999906	45.115	E
Q9HWD1	PA4267	rpsG	30S ribosomal protein S7	0.05			74	0.9999	47.915	E
Q51561	PA4270	rpoB	DNA-directed RNA polymerase subunit beta	0.05			291	0.999894	69.379	E
P13981	PA5171	arcA	Arginine deiminase	0.05			388	0.99989	40.085	E
Q9HWD1	PA4267	rpsG	30S ribosomal protein S7	0.05			63	0.99988	110.38	E
Q9HXY4	PA3648	opr86	Outer membrane protein assembly factor BamA	0.2			634	0.999879	74.89	E
Q9HWC9	PA4269	rpoC	DNA-directed RNA polymerase subunit beta'	0.05			443	0.999847	64.374	E
P13794	PA1777	oprF	Outer membrane porin F	0.05			342	0.999834	161.27	E
O82851	PA3655	tsf	Elongation factor Ts	0.05			217	0.99983	88.706	E
Q9HWD2	PA4266	fusA	Elongation factor G 1	0.05			500	0.999828	122.46	E
O82851	PA3655	tsf	Elongation factor Ts	0.05			100	0.999801	84.213	E
P53641	PA4366	sodB	Superoxide dismutase [Fe]	0.2			4	0.999783	43.604	E
P05384	PA1804	hupB	DNA-binding protein HU-beta	0.05			5	0.999773	75.574	E
Q9HY81	PA3529	PA3529	Probable peroxidase	0.05			118	0.999769	198.45	E
Q9I3D5	PA1583	sdhA	Succinate dehydrogenase flavoprotein subunit	0.05			263	0.999765	62.081	E
G3XD14	PA4723	dksA	RNA polymerase-binding transcription factor DksA	0.5			82	0.99975	57.802	E
Q9I2U2	PA1800	tig	Trigger factor	0.05			27	0.999723	61.962	E
Q9I747	PA0085	hcp1	Protein hcp1	0.3			15	0.999702	60.102	E
O52760	PA4238	rpoA	DNA-directed RNA polymerase subunit alpha	0.05			285	0.999695	71.342	E
P30720	PA4386	groS	10 kDa chaperonin	0.1			53	0.999682	97.635	E
Q9HVL6	PA4568	rplU	50S ribosomal protein L21	0.05			31	0.999681	85.457	E
Q9I3C5	PA1596	htpG	Chaperone protein HtpG	0.05			162	0.99966	136.81	E
Q9I6V6	PA0176	aer2	Aerotaxis transducer Aer2	0.9			313	0.999609	64.276	E
P13794	PA1777	oprF	Outer membrane porin F	0.05			277	0.999564	124.14	E
Q9I3D4	PA1584	sdhB	Succinate dehydrogenase (B subunit)	0.05			129	0.999554	42.059	E
Q9HWD2	PA4266	fusA	Elongation factor G 1	0.05			699	0.999544	43.405	E
Q9I1B8	PA2361	PA2361	Uncharacterized protein	#N/A			478	0.999474	44.135	E
Q9I120	PA2462	PA2462	Uncharacterized protein	0.7			4250	0.999473	84.568	E
Q9I0L5	PA2623	icd	Isocitrate dehydrogenase [NADP]	0.05			56	0.999433	53.968	E
Q9HZN4	PA2970	rpmF	50S ribosomal protein L32	0.2			23	0.999403	105.14	E
Q9I2U9	PA1793	ppiB	Peptidyl-prolyl cis-trans isomerase	0.2			158	0.999361	49.559	E
Q9I6M4	PA0266	davT	5-aminovalerate aminotransferase DavT	0.1			175	0.999259	69.398	E
Q9HWD2	PA4266	fusA	Elongation factor G 1	0.05			42	0.999209	143.57	E
Q9HVY6	PA4429	PA4429	Probable cytochrome c1	0.1			205	0.999206	89.301	E
Q9HZ71	PA3162	rpsA	30S ribosomal protein S1	0.05			81	0.99915	112.56	E
Q9HWE4	PA4254	rpsQ	30S ribosomal protein S17	0.05			83	0.999137	89.466	E
Q9HYX8	PA3262	PA3262	Peptidyl-prolyl cis-trans isomerase	0.1			164	0.999123	78.486	E
Q9HWD5	PA4263	rplC	50S ribosomal protein L3	0.05			42	0.999111	125.01	E
Q9HWD7	PA4261	rplW	50S ribosomal protein L23	0.05			99	0.999079	54.315	E
Q9HV59	PA4740	pnp	Polyribonucleotide nucleotidyltransferase	0.05			582	0.999048	124.37	E
Q9HXP9	PA3745	rpsP	30S ribosomal protein S16	0.05			55	0.998889	100.45	E
Q9HWD9	PA4259	rpsS	30S ribosomal protein S19	0.2			24	0.99884	57.174	E
Q9I662	PA0456	PA0456	Probable cold-shock protein	0.1			23	0.998792	71.085	E
P13982	PA5173	arcC	Carbamate kinase	0.1			293	0.998685	51.265	E
Q9I2V5	PA1787	acnB	Aconitate hydratase B	0.05			812	0.998676	48.913	E
Q9HVW7	PA4450	murA	UDP-N-acetylglucosamine 1-carboxyvinyltransferase	0.1			73	0.998642	87.568	E
Q9I685	PA0432	ahcY	Adenosylhomocysteinase	0.05			32	0.998559	98.676	E
Q9I7C4	PA0002	dnaN	Beta sliding clamp	0.05			210	0.998548	103.13	E
Q9HUM9	PA4935	rpsF	30S ribosomal protein S6	0.05			40	0.998463	67.889	E
Q9HWC9	PA4269	rpoC	DNA-directed RNA polymerase subunit beta'	0.05			523	0.998395	40.187	E
Q9I5Q3	PA0668	tyrS2	Tyrosine--tRNA ligase 2	0.3			95	0.998392	60	E
Q9HU56	PA5128	secB	Protein-export protein SecB	0.2			84	0.998281	66.644	E
O52759	PA4239	rpsD	30S ribosomal protein S4	0.05			197	0.998188	105.02	E
Q9HWD8	PA4260	rplB	50S ribosomal protein L2	0.05			199	0.998163	68.972	E
P30718	PA4385	groL	60 kDa chaperonin	0.05			408	0.998123	146.16	E
Q9HVC4	PA4671	rplY	50S ribosomal protein L25	0.05			148	0.998119	111.27	E
Q9HT18	PA5556	atpA	ATP synthase subunit alpha	0.05			255	0.998102	93.494	E
Q9I618	PA0500	bioB	Biotin synthase	1			93	0.998051	89.752	E
Q9I5Y4	PA0552	pgk	Phosphoglycerate kinase	0.2			382	0.99797	52.928	E
Q9HTS6	PA5274	rnk	Nucleoside diphosphate kinase regulator	1			121	0.997898	76.378	E
Q9HV43	PA4761	dnaK	Chaperone protein DnaK	0.05			571	0.997759	96.331	E
P13794	PA1777	oprF	Outer membrane porin F	0.05			333	0.997757	111.83	E
O82851	PA3655	tsf	Elongation factor Ts	0.05			35	0.99769	128.27	E
Q9HUM9	PA4935	rpsF	30S ribosomal protein S6	0.05			73	0.997649	70.856	E
P11221	PA2853	oprI	Major outer membrane lipoprotein	0.05			71	0.997601	119.45	E
Q9HWG0	PA4234	uvrA	UvrABC system protein A	0.3			185	0.997545	76.326	E
Q51567	PA1589	sucD	Succinate--CoA ligase [ADP-forming] subunit alpha	0.05			84	0.997534	120.63	E
Q9HVK5	PA4579	PA4579	Uncharacterized protein	0.5			265	0.997506	75.38	E
Q9HVL6	PA4568	rplU	50S ribosomal protein L21	0.05			16	0.997419	68.515	E
Q9HT19	PA5555	atpG	ATP synthase gamma chain	0.1			162	0.997381	64.374	E
P37798	PA4848	accC	Biotin carboxylase	0.1			296	0.997362	45.347	E
Q9I0L5	PA2623	icd	Isocitrate dehydrogenase [NADP]	0.05			156	0.997303	61.167	E
Q9HVC4	PA4671	rplY	50S ribosomal protein L25	0.05			204	0.997295	96.171	E
Q9HZM8	PA2976	rne	Ribonuclease E	0.05			425	0.997012	82.417	E
Q9HWC9	PA4269	rpoC	DNA-directed RNA polymerase subunit beta'	0.05			438	0.99697	42.958	E
P30718	PA4385	groL	60 kDa chaperonin	0.05			164	0.996681	68.97	E
Q9HW14	PA4390	PA4390	Uncharacterized protein	0.8			311	0.996584	110.38	E
Q9HV59	PA4740	pnp	Polyribonucleotide nucleotidyltransferase	0.05			225	0.996443	43.229	E
Q9HVV2	PA4466	ptsH	Phosphocarrier protein HPr	#N/A			40	0.996402	45.28	E
O82851	PA3655	tsf	Elongation factor Ts	0.05			273	0.996378	151.41	E
Q9HZM8	PA2976	rne	Ribonuclease E	0.05			94	0.996325	97.095	E
Q9HZK4	PA3001	PA3001	Glyceraldehyde-3-phosphate dehydrogenase	0.1			419	0.99631	115.83	E
Q9HV54	PA4745	nusA	Transcription termination/antitermination protein NusA	0.1			209	0.996228	42.843	E
Q9HUM9	PA4935	rpsF	30S ribosomal protein S6	0.05			30	0.995796	97.093	E
Q9HV54	PA4745	nusA	Transcription termination/antitermination protein NusA	0.1			214	0.995748	80.585	E
Q06553	PA0611	prtR	HTH-type transcriptional regulator PrtR	#N/A			132	0.995629	45.081	E
Q9HVC4	PA4671	rplY	50S ribosomal protein L25	0.05			46	0.994789	92.336	E
Q9HWD2	PA4266	fusA	Elongation factor G 1	0.05			56	0.994693	145.17	E
Q59638	PA5016	aceF	Dihydrolipoyllysine-residue acetyltransferase component of pyruvate dehydrogenase complex	0.1			263	0.99467	78.113	E
Q9HWD4	PA4264	rpsJ	30S ribosomal protein S10	0.2			24	0.994585	77.42	E
Q9HZZ2	PA2851	efp	Elongation factor P	0.1			61	0.994398	56.956	E
Q9HWD2	PA4266	fusA	Elongation factor G 1	0.05			120	0.994235	77.575	E
Q9HX19	PA4008	PA4008	Probable hydrolase	#N/A			205	0.994148	66.692	E
Q9HWD2	PA4266	fusA	Elongation factor G 1	0.05			480;481	0.99407	98.253	E
Q9HYT5	PA3309	PA3309	Uncharacterized protein	0.05			106	0.994057	107.41	E
O54439	PA2966	acpP1	Acyl carrier protein 1	0.1			68	0.993991	43.432	E
Q51564	PA5278	dapF	Diaminopimelate epimerase	0.3			73	0.99391	65.107	E
O52759	PA4239	rpsD	30S ribosomal protein S4	0.05			172	0.993172	86.911	E
P13794	PA1777	oprF	Outer membrane porin F	0.05			348	0.99275	47.039	E
Q9HXN2	PA3763	purL	Phosphoribosylformylglycinamidine synthase	0.2			823	0.991431	72.705	E
Q9HV43	PA4761	dnaK	Chaperone protein DnaK	0.05			585	0.991267	99.752	E
Q9HWE0	PA4258	rplV	50S ribosomal protein L22	0.05			52	0.990702	94.73	E
Q9I3C5	PA1596	htpG	Chaperone protein HtpG	0.05			550	0.99066	103.66	E
Q9I2U2	PA1800	tig	Trigger factor	0.05			199	0.990249	97.284	E
Q9HZ71	PA3162	rpsA	30S ribosomal protein S1	0.05			191	0.990239	66.706	E
Q9HT20	PA5554	atpD	ATP synthase subunit beta	0.05			40	0.990207	107.72	E
P09591	PA4265; PA4277	tufA	Elongation factor Tu	0.05			349	0.990121	107.83	E
Q9I454	PA1290	PA1290	Probable transcriptional regulator	#N/A			12	0.989164	50.088	E
Q9HTQ4	PA5300	cycB	Cytochrome c5	0.3			61	0.989026	81.548	E
Q9HV54	PA4745	nusA	Transcription termination/antitermination protein NusA	0.1			42	0.989023	70.977	E
Q9I3D1	PA1587	lpdG	Dihydrolipoyl dehydrogenase	0.05			379	0.988742	93.812	E
P09591	PA4265; PA4277	tufA	Elongation factor Tu	0.05			244	0.988687	90.653	E
Q9HVV7	PA4460	lptA	Lipopolysaccharide export system protein LptA	0.4			80	0.98868	104.6	E
P09591	PA4265; PA4277	tufA	Elongation factor Tu	0.05			148	0.988221	67.727	E
Q9HV59	PA4740	pnp	Polyribonucleotide nucleotidyltransferase	0.05			669	0.988182	73.082	E
Q9I002	PA2841	PA2841	Probable enoyl-CoA hydratase/isomerase	0.3			243	0.988109	40.045	E
Q51561	PA4270	rpoB	DNA-directed RNA polymerase subunit beta	0.05			317	0.987982	59.943	E
Q9HWD2	PA4266	fusA	Elongation factor G 1	0.05			58	0.987723	105.06	E
P30718	PA4385	groL	60 kDa chaperonin	0.05			355	0.98763	81.48	E
Q9HWD2	PA4266	fusA	Elongation factor G 1	0.05			413	0.987218	47.217	E
Q9HV54	PA4745	nusA	Transcription termination/antitermination protein NusA	0.1			271	0.986937	74.987	E
Q9HWC9	PA4269	rpoC	DNA-directed RNA polymerase subunit beta'	0.05			532	0.986555	105.14	E
P11221	PA2853	oprI	Major outer membrane lipoprotein	0.05			35	0.986049	126.07	E
Q9I6M4	PA0266	davT	5-aminovalerate aminotransferase DavT	0.1			40	0.984529	51.726	E
Q9HWC4	PA4275	nusG	Transcription termination/antitermination protein NusG	0.2			168	0.984439	52.5	E
Q9HZ71	PA3162	rpsA	30S ribosomal protein S1	0.05			308	0.983545	203.67	E
Q9HVC4	PA4671	rplY	50S ribosomal protein L25	0.05			55	0.983311	148.26	E
Q9HV43	PA4761	dnaK	Chaperone protein DnaK	0.05			137	0.982562	90.468	E
Q9HWD2	PA4266	fusA	Elongation factor G 1	0.05			217	0.982504	73.616	E
Q9HXM5	PA3770	guaB	Inosine-5'-monophosphate dehydrogenase	0.05			288	0.981993	43.635	E
P04739	PA4525	pilA	Fimbrial protein	0.05			54	0.981536	83.948	E
Q9I3D5	PA1583	sdhA	Succinate dehydrogenase flavoprotein subunit	0.05			456	0.981519	72.652	E
O82850	PA3656	rpsB	30S ribosomal protein S2	0.05			169	0.981392	97.284	E
Q9I6M4	PA0266	davT	5-aminovalerate aminotransferase DavT	0.1			89	0.981337	112.47	E
P30718	PA4385	groL	60 kDa chaperonin	0.05			354	0.981327	64.244	E
Q9HZK4	PA3001	PA3001	Glyceraldehyde-3-phosphate dehydrogenase	0.1			224	0.98008	51.872	E
P09591	PA4265; PA4277	tufA	Elongation factor Tu	0.05			153	0.979908	72.184	E
Q9HVY3	PA4432	rpsI	30S ribosomal protein S9	0.05			92	0.979472	80.165	E
O82852	PA3654	pyrH	Uridylate kinase	0.2			158	0.978655	49.934	E
Q9X2T1	PA5240	trxA	Thioredoxin	0.3			31	0.978118	40.179	E
Q9HT18	PA5556	atpA	ATP synthase subunit alpha	0.05			103	0.977819	59.227	E
O52761	PA4237	rplQ	50S ribosomal protein L17	0.1			114	0.977765	70.449	E
P11221	PA2853	oprI	Major outer membrane lipoprotein	0.05			68	0.9774	116.77	E
Q9I6Z3	PA0139	ahpC	Alkyl hydroperoxide reductase subunit C	0.05			26	0.976736	100.02	E
Q9HT18	PA5556	atpA	ATP synthase subunit alpha	0.05			307	0.976422	107.66	E
Q9HT20	PA5554	atpD	ATP synthase subunit beta	0.05			96	0.976347	108.71	E
Q9HWF0	PA4248	rplF	50S ribosomal protein L6	0.05			49	0.975963	54.598	E
Q9HWD1	PA4267	rpsG	30S ribosomal protein S7	0.05			60	0.974881	55.258	E
Q59637	PA5015	aceE	Pyruvate dehydrogenase E1 component	0.05			699	0.974335	58.917	E
P30718	PA4385	groL	60 kDa chaperonin	0.05			343	0.973709	124.18	E
Q9HWD2	PA4266	fusA	Elongation factor G 1	0.05			228	0.97365	81.409	E
Q9HV54	PA4745	nusA	Transcription termination/antitermination protein NusA	0.1			96	0.97325	58.815	E
Q9HYT5	PA3309	PA3309	Uncharacterized protein	0.05			83	0.97272	81.992	E
P47205	PA4406	lpxC	UDP-3-O-acyl-N-acetylglucosamine deacetylase	0.1			157	0.972329	48.704	E
Q9HXM5	PA3770	guaB	Inosine-5'-monophosphate dehydrogenase	0.05			231	0.972128	71.548	E
Q9HWD5	PA4263	rplC	50S ribosomal protein L3	0.05			29	0.971836	114.4	E
Q9I3D2	PA1586	sucB	Dihydrolipoyllysine-residue succinyltransferase component of 2-oxoglutarate dehydrogenase complex	0.05			298	0.971704	64.346	E
P13981	PA5171	arcA	Arginine deiminase	0.05			71	0.970993	108.25	E
Q9HZN4	PA2970	rpmF	50S ribosomal protein L32	0.2			60	0.969746	81.548	E
Q9I3D2	PA1586	sucB	Dihydrolipoyllysine-residue succinyltransferase component of 2-oxoglutarate dehydrogenase complex	0.05			63	0.969293	48.391	E
Q9HZM8	PA2976	rne	Ribonuclease E	0.05			30	0.969185	69.451	E
Q9I685	PA0432	ahcY	Adenosylhomocysteinase	0.05			280	0.967672	61.102	E
Q9I2W9	PA1770	ppsA	Phosphoenolpyruvate synthase	0.05			594	0.967454	65.043	E
Q9HZM8	PA2976	rne	Ribonuclease E	0.05			63	0.966326	42.813	E
Q9HVY6	PA4429	PA4429	Probable cytochrome c1	0.1			78	0.965868	59.864	E
Q9HUP3	PA4920	nadE	NH(3)-dependent NAD(+) synthetase	0.3			124	0.965052	40.668	E
Q9HWD2	PA4266	fusA	Elongation factor G 1	0.05			100	0.965027	144.68	E
Q9HZ71	PA3162	rpsA	30S ribosomal protein S1	0.05			295	0.964558	100.97	E
P95459	PA3266	cspA	Major cold shock protein CspA	0.4			24	0.963781	40.798	E
P30718	PA4385	groL	60 kDa chaperonin	0.05			363	0.963286	145.29	E
Q9I3D2	PA1586	sucB	Dihydrolipoyllysine-residue succinyltransferase component of 2-oxoglutarate dehydrogenase complex	0.05			123	0.963147	110.56	E
Q9HVL6	PA4568	rplU	50S ribosomal protein L21	0.05			18	0.961457	104.75	E
Q9HWE2	PA4256	rplP	50S ribosomal protein L16	0.05			105	0.961147	206.97	E
P13794	PA1777	oprF	Outer membrane porin F	0.05			346	0.960635	86.114	E
Q9HWF4	PA4244	rplO	50S ribosomal protein L15	0.05			86	0.958676	114.89	E
Q9HV43	PA4761	dnaK	Chaperone protein DnaK	0.05			520	0.958523	90.718	E
Q9HT18	PA5556	atpA	ATP synthase subunit alpha	0.05			11	0.956988	48.823	E
Q9I4Z4	PA0973	pal	Peptidoglycan-associated lipoprotein	0.1			155	0.956299	117.07	E
Q9HV43	PA4761	dnaK	Chaperone protein DnaK	0.05			336	0.956271	88.176	E
P13981	PA5171	arcA	Arginine deiminase	0.05			365	0.956174	62.442	E
P30718	PA4385	groL	60 kDa chaperonin	0.05			167	0.954696	88.571	E
Q9HV59	PA4740	pnp	Polyribonucleotide nucleotidyltransferase	0.05			521	0.953282	53.033	E
Q9HWC9	PA4269	rpoC	DNA-directed RNA polymerase subunit beta'	0.05			15	0.952925	48.568	E
Q9I2U2	PA1800	tig	Trigger factor	0.05			175	0.952796	115.57	E
P30718	PA4385	groL	60 kDa chaperonin	0.05			186	0.952787	127.3	E
Q9HV59	PA4740	pnp	Polyribonucleotide nucleotidyltransferase	0.05			249	0.952592	68.576	E
P32722	PA0958	oprD	Porin D	0.05			228	0.951056	126.26	E
Q9HV43	PA4761	dnaK	Chaperone protein DnaK	0.05			47	0.950269	129.46	E
Q9HYT5	PA3309	PA3309	Uncharacterized protein	0.05			78	0.948742	55.975	E
Q9HWD2	PA4266	fusA	Elongation factor G 1	0.05			98	0.948511	139.17	E
Q9HWD2	PA4266	fusA	Elongation factor G 1	0.05			665;660	0.94807	44.998	E
Q9I5Z0	PA0546	metK	S-adenosylmethionine synthase	0.05			131	0.946156	101.78	E
O82850	PA3656	rpsB	30S ribosomal protein S2	0.05			118	0.944486	108.75	E
Q9I6X3	PA0159	PA0159	Probable transcriptional regulator	#N/A			63	0.944447	58.433	E
P09591	PA4265; PA4277	tufA	Elongation factor Tu	0.05			245	0.943907	195.27	E
Q9HXM5	PA3770	guaB	Inosine-5'-monophosphate dehydrogenase	0.05			54	0.943506	55.763	E
G3XD94	PA3159	wbpA	UDP-N-acetyl-D-glucosamine 6-dehydrogenase	0.1			88	0.943292	76.341	E
P30718	PA4385	groL	60 kDa chaperonin	0.05			461	0.941113	70.197	E
Q9HWC6	PA4273	rplA	50S ribosomal protein L1	0.05			190	0.940616	57.328	E
Q9HWD2	PA4266	fusA	Elongation factor G 1	0.05			593	0.939509	68.129	E
Q9HV55	PA4744	infB	Translation initiation factor IF-2	0.05			385	0.939114	113.36	E
Q9X2T1	PA5240	trxA	Thioredoxin	0.3			14	0.937845	62.203	E
Q9I2U6	PA1796	folD	Bifunctional protein FolD	0.3			245	0.936932	52.576	E
Q9HU65	PA5119	glnA	Glutamine synthetase	0.1			45	0.933544	42.031	E
Q9HXI8	PA3814	iscS	Cysteine desulfurase IscS	0.05			266	0.931798	58.132	E
Q9I3C5	PA1596	htpG	Chaperone protein HtpG	0.05			254	0.930301	55.98	E
Q9I4I2	PA1155	nrdB	Ribonucleoside-diphosphate reductase subunit beta	0.4			68	0.926908	69.765	E
P08308	PA5172	arcB	Ornithine carbamoyltransferase, catabolic	0.05			106	0.925544	58.981	E
Q9HTV8	PA5232	PA5232	Uncharacterized protein	0.2			49	0.923961	51.252	E
Q9HWE7	PA4251	rplE	50S ribosomal protein L5	0.05			140	0.923688	49.537	E
Q9HZU8	PA2899	PA2899	Probable transcriptional regulator	#N/A			153	0.923028	52.79	E
Q9HV43	PA4761	dnaK	Chaperone protein DnaK	0.05			509	0.920294	55.335	E
Q9I4Z4	PA0973	pal	Peptidoglycan-associated lipoprotein	0.1			106	0.919407	118.4	E
Q9HT11	PA5563	soj	Chromosome partitioning protein Soj	0.8			100	0.918626	60.657	E
Q9HWE0	PA4258	rplV	50S ribosomal protein L22	0.05			62	0.918246	96.55	E
Q9HZ71	PA3162	rpsA	30S ribosomal protein S1	0.05			76	0.914442	61.767	E
Q9I5Q6	PA0665	erpA	Iron-sulfur cluster insertion protein ErpA	0.6			85	0.911853	52.92	E
Q9LCT3	PA4403	secA	Protein translocase subunit SecA	0.1			397	0.90886	81.448	E
Q9I2Q8	PA1837	PA1837	Uncharacterized protein	0.8			148	0.908105	71.608	E
Q9HZ71	PA3162	rpsA	30S ribosomal protein S1	0.05			355	0.9071	59.502	E
Q9I2U2	PA1800	tig	Trigger factor	0.05			250	0.906054	87.02	E
Q9HWD2	PA4266	fusA	Elongation factor G 1	0.05			628;623	0.904359	66.386	E
Q9HZ71	PA3162	rpsA	30S ribosomal protein S1	0.05			437	0.904276	96.773	E
Q9HZ71	PA3162	rpsA	30S ribosomal protein S1	0.05			497	0.898205	77.894	E
Q9I0L5	PA2623	icd	Isocitrate dehydrogenase [NADP]	0.05			396	0.896285	49.368	E
Q9I748	PA0084	PA0084	Uncharacterized protein	0.2			3	0.895195	111.5	E
Q51561	PA4270	rpoB	DNA-directed RNA polymerase subunit beta	0.05			223	0.892616	47.567	E
Q9I2V5	PA1787	acnB	Aconitate hydratase B	0.05			104	0.891845	55.366	E
O82851	PA3655	tsf	Elongation factor Ts	0.05			141	0.888138	81.494	E
Q9HVY3	PA4432	rpsI	30S ribosomal protein S9	0.05			56	0.886602	46.378	E
Q9I3C3	PA1598	panB1	3-methyl-2-oxobutanoate hydroxymethyltransferase 1	#N/A			245	0.884362	42.001	E
Q9HY81	PA3529	PA3529	Probable peroxidase	0.05			25	0.879946	54.167	E
Q9HUM6	PA4938	purA	Adenylosuccinate synthetase	0.2			49	0.876955	49.049	E
Q9HZL1	PA2994	nqrF	Na(+)-translocating NADH-quinone reductase subunit F	0.3			158	0.876306	46.796	E
Q9HWC6	PA4273	rplA	50S ribosomal protein L1	0.05			99	0.874519	101.39	E
Q9HV54	PA4745	nusA	Transcription termination/antitermination protein NusA	0.1			220	0.873948	58.246	E
O82851	PA3655	tsf	Elongation factor Ts	0.05			187	0.872593	99.064	E
Q9HV43	PA4761	dnaK	Chaperone protein DnaK	0.05			573	0.870241	55.084	E
Q9HV59	PA4740	pnp	Polyribonucleotide nucleotidyltransferase	0.05			672	0.869887	43.991	E
Q9HWE4	PA4254	rpsQ	30S ribosomal protein S17	0.05			52	0.868723	62.466	E
Q9I685	PA0432	ahcY	Adenosylhomocysteinase	0.05			164	0.867908	73.219	E
Q9HWD5	PA4263	rplC	50S ribosomal protein L3	0.05			87	0.866409	157.96	E
Q9I5P1	PA0684	PA0684	Probable type II secretion system protein	#N/A			167	0.864432	40.002	E
Q9I0L4	PA2624	idh	Isocitrate dehydrogenase	0.1			218	0.86414	43.497	E
Q9I0L4	PA2624	idh	Isocitrate dehydrogenase	0.1			693	0.862837	104.87	E
Q9HWD2	PA4266	fusA	Elongation factor G 1	0.05			247	0.860966	82.543	E
Q9HV43	PA4761	dnaK	Chaperone protein DnaK	0.05			629	0.860303	96.096	E
Q9HWD5	PA4263	rplC	50S ribosomal protein L3	0.05			18	0.858189	118.96	E
Q9HV59	PA4740	pnp	Polyribonucleotide nucleotidyltransferase	0.05			372	0.854652	64.65	E
Q9I2U2	PA1800	tig	Trigger factor	0.05			73	0.853849	86.453	E
Q9HWE7	PA4251	rplE	50S ribosomal protein L5	0.05			58	0.853505	106.01	E
Q9LCT3	PA4403	secA	Protein translocase subunit SecA	0.1			839	0.848704	51.531	E
O52761	PA4237	rplQ	50S ribosomal protein L17	0.1			32	0.848521	47.568	E
Q9HWC6	PA4273	rplA	50S ribosomal protein L1	0.05			103	0.847003	81.967	E
Q9HV59	PA4740	pnp	Polyribonucleotide nucleotidyltransferase	0.05			621	0.846048	78.342	E
Q9HWE7	PA4251	rplE	50S ribosomal protein L5	0.05			42	0.845961	76.341	E
Q9HZI7	PA3019	PA3019	Probable ATP-binding component of ABC transporter	0.6			291	0.844267	48.794	E
Q9HZJ7	PA3009	PA3009	Uncharacterized protein	#N/A			71	0.842761	48.568	E
Q9HWC9	PA4269	rpoC	DNA-directed RNA polymerase subunit beta'	0.05			187	0.84205	70.453	E
P53593	PA1588	sucC	Succinate--CoA ligase [ADP-forming] subunit beta	0.05			134	0.841536	102.52	E
Q9HU67	PA5117	typA	Regulatory protein TypA	0.2			408	0.84073	112.99	E
Q9HVJ1	PA4595	PA4595	Probable ATP-binding component of ABC transporter	0.2			60	0.84062	65.092	E
P30718	PA4385	groL	60 kDa chaperonin	0.05			434	0.840298	109.6	E
P09591	PA4265; PA4277	tufA	Elongation factor Tu	0.05			69	0.839343	74.786	E
Q9I762	PA0070	PA0070	Uncharacterized protein	0.1			172	0.838697	85.676	E
P57668	PA2532	tpx	Thiol peroxidase	0.3			151	0.837255	45.88	E
Q9I3C5	PA1596	htpG	Chaperone protein HtpG	0.05			227	0.83681	83.423	E
Q9I0L5	PA2623	icd	Isocitrate dehydrogenase [NADP]	0.05			35	0.835927	53.342	E
Q9HTD7	PA5429	aspA	Aspartate ammonia-lyase	0.2			452	0.835005	74.732	E
Q9HZ71	PA3162	rpsA	30S ribosomal protein S1	0.05			475	0.834872	67.846	E
Q9HWD6	PA4262	rplD	50S ribosomal protein L4	0.05			24	0.832715	62.19	E
Q9HXJ5	PA3802	hisS	Histidine--tRNA ligase	0.3			58	0.832448	56.529	E
Q9HY84	PA3525	argG	Argininosuccinate synthase	0.1			85	0.830146	46.178	E
Q51567	PA1589	sucD	Succinate--CoA ligase [ADP-forming] subunit alpha	0.05			62	0.828298	96.391	E
P09591	PA4265; PA4277	tufA	Elongation factor Tu	0.05			145	0.825995	103.01	E
Q9HZ71	PA3162	rpsA	30S ribosomal protein S1	0.05			527	0.825673	127.17	E
Q9HWE2	PA4256	rplP	50S ribosomal protein L16	0.05			111	0.823889	114.7	E
Q9HV54	PA4745	nusA	Transcription termination/antitermination protein NusA	0.1			68	0.823613	192.99	E
Q9HWC4	PA4275	nusG	Transcription termination/antitermination protein NusG	0.2			32	0.818873	105.95	E
P30718	PA4385	groL	60 kDa chaperonin	0.05			490	0.818109	56.533	E
Q9HV43	PA4761	dnaK	Chaperone protein DnaK	0.05			310	0.816158	57.434	E
Q9HT18	PA5556	atpA	ATP synthase subunit alpha	0.05			97	0.815448	49.483	E
Q9HV43	PA4761	dnaK	Chaperone protein DnaK	0.05			78	0.812887	46.001	E
Q51422	PA0963	aspS	Aspartate--tRNA(Asp/Asn) ligase	0.1			43	0.811333	67.56	E
P09591	PA4265; PA4277	tufA	Elongation factor Tu	0.05			373	0.81069	111.07	E
Q9I3D3	PA1585	sucA	2-oxoglutarate dehydrogenase (E1 subunit)	0.1			861	0.808755	83.776	E
Q9HWE2	PA4256	rplP	50S ribosomal protein L16	0.05			112	0.807993	87.083	E
P30718	PA4385	groL	60 kDa chaperonin	0.05			191	0.805657	127.3	E
Q9I583	PA0858	PA0858	UPF0176 protein PA0858	1			126	0.804979	65.231	E
Q9HZ71	PA3162	rpsA	30S ribosomal protein S1	0.05			425	0.803942	66.893	E
Q9I787	PA0045	PA0045	Uncharacterized protein	0.4			102	0.799727	47.088	E
Q9HZ71	PA3162	rpsA	30S ribosomal protein S1	0.05			338	0.799547	89.507	E
Q59638	PA5016	aceF	Dihydrolipoyllysine-residue acetyltransferase component of pyruvate dehydrogenase complex	0.1			279	0.798207	67.93	E
Q59637	PA5015	aceE	Pyruvate dehydrogenase E1 component	0.05			17	0.79034	129.61	E
Q9HX96	PA3917	moaD	Molybdopterin synthase sulfur carrier subunit	#N/A			73	0.789023	73.574	E
Q9HXS5	PA3716	PA3716	Uncharacterized protein	0.2			160	0.788032	84.499	E
Q9HZ71	PA3162	rpsA	30S ribosomal protein S1	0.05			538	0.787877	75.97	E
O69077	PA0904	lysC	Aspartokinase	0.2			403	0.78603	60.301	E
Q59636	PA3807	ndk	Nucleoside diphosphate kinase	0.1			113	0.785114	153.56	E
P53593	PA1588	sucC	Succinate--CoA ligase [ADP-forming] subunit beta	0.05			107	0.781533	60.032	E
Q9HT20	PA5554	atpD	ATP synthase subunit beta	0.05			272	0.779963	52.451	E
Q9I4Z4	PA0973	pal	Peptidoglycan-associated lipoprotein	0.1			70	0.779252	98.816	E
Q9I0A0	PA2743	infC	Translation initiation factor IF-3	0.2			107	0.777153	59.227	E
Q9HXQ2	PA3742	rplS	50S ribosomal protein L19	0.05			12	0.77622	65.241	E
Q59636	PA3807	ndk	Nucleoside diphosphate kinase	0.1			78	0.768851	56.247	E
Q9I2U2	PA1800	tig	Trigger factor	0.05			372	0.766956	121.77	E
Q9I2W9	PA1770	ppsA	Phosphoenolpyruvate synthase	0.05			17	0.762493	48.568	E
Q9I6M5	PA0265	davD	Glutarate-semialdehyde dehydrogenase DavD	0.1			341	0.759432	55.776	E
O87125	PA1459	cheB1	Chemotaxis response regulator protein-glutamate methylesterase of group 1 operon	0.5	pAsp	55	348	1	98.507	N
P26275	PA5261	algR	Positive alginate biosynthesis regulatory protein	0.1	pAsp	54	2	1	78.763	N
Q9HV73	PA4726	cbrB	Two-component response regulator CbrB	0.5	pAsp	52	192	1	75.243	N
Q9HVS8	PA4493	roxR	RoxR	0.4	pAsp	63	160	1	85.909	N
Q9I045	PA2798	PA2798	Probable two-component response regulator	0.3	pAsp	56	142	1	48.242	N
Q9HTY9	PA5200	amgR	AmgR	0.5	pAsp	61	42	0.996239	41.704	N
Q9I696	PA0413	chpA	Component of chemotactic signal transduction system	0.3	pAsp	2401	1863	0.985388	43.164	N
Q9HTE9	PA5415	glyA1	Serine hydroxymethyltransferase 1	0.8			245;245;244	1	116.73	N
G3XD24	PA4309	pctA	Methyl-accepting chemotaxis protein PctA	0.3			436;436;439	1	99.442	N
G3XD24	PA4309	pctA	Methyl-accepting chemotaxis protein PctA	0.3			387;387;390	1	109.42	N
G3XD24	PA4309	pctA	Methyl-accepting chemotaxis protein PctA	0.3			548;548;551	1	131.11	N
Q9I3G1	PA1556	ccoO2	Cytochrome c oxidase, cbb3-type, CcoO subunit	0.05			145;146	1	62.894	N
Q9I3G1	PA1556	ccoO2	Cytochrome c oxidase, cbb3-type, CcoO subunit	0.05			129;130	1	68.312	N
P32722	PA0958	oprD	Porin D	0.05			52;48	1	87.839	N
P37798	PA4848	accC	Biotin carboxylase	0.1			340;338	1	89.296	N
P95459	PA3266	cspA	Major cold shock protein CspA	0.4			13;13	1	114.02	N
Q9HWD2	PA4266	fusA	Elongation factor G 1	0.05			639;634	1	105.77	N
G3XD23	PA3158	wbpB	UDP-N-acetyl-2-amino-2-deoxy-D-glucuronate oxidase	0.1			292	1	40.015	N
G3XD23	PA3158	wbpB	UDP-N-acetyl-2-amino-2-deoxy-D-glucuronate oxidase	0.1			305	1	69.747	N
G3XD61	PA3148	wbpI	UDP-2,3-diacetamido-2,3-dideoxy-D-glucuronate 2-epimerase	0.2			207	1	53.089	N
G3XD61	PA3148	wbpI	UDP-2,3-diacetamido-2,3-dideoxy-D-glucuronate 2-epimerase	0.2			309	1	110.56	N
G3XD61	PA3148	wbpI	UDP-2,3-diacetamido-2,3-dideoxy-D-glucuronate 2-epimerase	0.2			133	1	65.038	N
G3XD61	PA3148	wbpI	UDP-2,3-diacetamido-2,3-dideoxy-D-glucuronate 2-epimerase	0.2			154	1	53.351	N
G3XD61	PA3148	wbpI	UDP-2,3-diacetamido-2,3-dideoxy-D-glucuronate 2-epimerase	0.2			98	1	74.953	N
G3XD94	PA3159	wbpA	UDP-N-acetyl-D-glucosamine 6-dehydrogenase	0.1			228	1	118.91	N
G3XD94	PA3159	wbpA	UDP-N-acetyl-D-glucosamine 6-dehydrogenase	0.1			222	1	81.297	N
G3XD94	PA3159	wbpA	UDP-N-acetyl-D-glucosamine 6-dehydrogenase	0.1			318	1	81.972	N
G3XD94	PA3159	wbpA	UDP-N-acetyl-D-glucosamine 6-dehydrogenase	0.1			5	1	117.7	N
O30508	PA0895	aruC	Succinylornithine transaminase/acetylornithine aminotransferase	0.1			220	1	167.45	N
O52759	PA4239	rpsD	30S ribosomal protein S4	0.05			100	1	107.43	N
O52760	PA4238	rpoA	DNA-directed RNA polymerase subunit alpha	0.05			273	1	107.65	N
O52760	PA4238	rpoA	DNA-directed RNA polymerase subunit alpha	0.05			41	1	86.344	N
O52760	PA4238	rpoA	DNA-directed RNA polymerase subunit alpha	0.05			267	1	84.025	N
O52760	PA4238	rpoA	DNA-directed RNA polymerase subunit alpha	0.05			293	1	79.454	N
O52760	PA4238	rpoA	DNA-directed RNA polymerase subunit alpha	0.05			188	1	93.551	N
O52761	PA4237	rplQ	50S ribosomal protein L17	0.1			107	1	103.73	N
O52761	PA4237	rplQ	50S ribosomal protein L17	0.1			62	1	97.068	N
O52761	PA4237	rplQ	50S ribosomal protein L17	0.1			81	1	83.265	N
O52761	PA4237	rplQ	50S ribosomal protein L17	0.1			89	1	52.579	N
O52762	PA4236	katA	Catalase	0.05			442	1	88.565	N
O54438	PA2967	fabG	3-oxoacyl-[acyl-carrier-protein] reductase FabG	0.05			180	1	79.97	N
O54438	PA2967	fabG	3-oxoacyl-[acyl-carrier-protein] reductase FabG	0.05			96	1	74.415	N
O69077	PA0904	lysC	Aspartokinase	0.2			340	1	76.827	N
O69078	PA0905	csrA	Translational regulator CsrA	0.1			35	1	49.59	N
O82850	PA3656	rpsB	30S ribosomal protein S2	0.05			177	1	158.36	N
O82850	PA3656	rpsB	30S ribosomal protein S2	0.05			42	1	79.713	N
O82850	PA3656	rpsB	30S ribosomal protein S2	0.05			65	1	59.205	N
O82850	PA3656	rpsB	30S ribosomal protein S2	0.05			190	1	85.184	N
O82850	PA3656	rpsB	30S ribosomal protein S2	0.05			51	1	107.09	N
O82850	PA3656	rpsB	30S ribosomal protein S2	0.05			103	1	156.01	N
O82851	PA3655	tsf	Elongation factor Ts	0.05			104	1	173.28	N
O82851	PA3655	tsf	Elongation factor Ts	0.05			55	1	145.43	N
O82851	PA3655	tsf	Elongation factor Ts	0.05			204	1	127.36	N
O82851	PA3655	tsf	Elongation factor Ts	0.05			164	1	121.52	N
O82851	PA3655	tsf	Elongation factor Ts	0.05			70	1	66.994	N
O82851	PA3655	tsf	Elongation factor Ts	0.05			159	1	114.02	N
O82852	PA3654	pyrH	Uridylate kinase	0.2			183	1	83.063	N
O86428	PA5013	ilvE	Branched-chain-amino-acid aminotransferase	0.05			223	1	63.727	N
P00106	PA5490	cc4	Cytochrome c4	0.1			171	1	98.933	N
P04739	PA4525	pilA	Fimbrial protein	0.05			87	1	103.71	N
P04739	PA4525	pilA	Fimbrial protein	0.05			47	1	189.17	N
P04739	PA4525	pilA	Fimbrial protein	0.05			125	1	118.06	N
P05384	PA1804	hupB	DNA-binding protein HU-beta	0.05			90	1	124.08	N
P05384	PA1804	hupB	DNA-binding protein HU-beta	0.05			2	1	90.729	N
P08280	PA3617	recA	Protein RecA	0.1			180	1	40.045	N
P08280	PA3617	recA	Protein RecA	0.1			135	1	95.094	N
P08280	PA3617	recA	Protein RecA	0.1			311	1	83.617	N
P08308	PA5172	arcB	Ornithine carbamoyltransferase, catabolic	0.05			266	1	83.087	N
P08308	PA5172	arcB	Ornithine carbamoyltransferase, catabolic	0.05			280	1	80.312	N
P08308	PA5172	arcB	Ornithine carbamoyltransferase, catabolic	0.05			48	1	103.26	N
P09591	PA4265; PA4277	tufA	Elongation factor Tu	0.05			277	1	87.806	N
P09591	PA4265; PA4277	tufA	Elongation factor Tu	0.05			185	1	97.813	N
P09591	PA4265; PA4277	tufA	Elongation factor Tu	0.05			159	1	105.35	N
P09591	PA4265; PA4277	tufA	Elongation factor Tu	0.05			64	1	124.25	N
P09591	PA4265; PA4277	tufA	Elongation factor Tu	0.05			136	1	113.22	N
P09591	PA4265; PA4277	tufA	Elongation factor Tu	0.05			344	1	118.37	N
P13794	PA1777	oprF	Outer membrane porin F	0.05			298	1	61.862	N
P13794	PA1777	oprF	Outer membrane porin F	0.05			306	1	182.93	N
P13794	PA1777	oprF	Outer membrane porin F	0.05			254	1	130.56	N
P13794	PA1777	oprF	Outer membrane porin F	0.05			85	1	66.568	N
P13794	PA1777	oprF	Outer membrane porin F	0.05			261	1	120.46	N
P13794	PA1777	oprF	Outer membrane porin F	0.05			329	1	94.692	N
P13794	PA1777	oprF	Outer membrane porin F	0.05			138	1	102.06	N
P13794	PA1777	oprF	Outer membrane porin F	0.05			316	1	134.29	N
P13794	PA1777	oprF	Outer membrane porin F	0.05			150	1	92.653	N
P13981	PA5171	arcA	Arginine deiminase	0.05			178	1	48.288	N
P13981	PA5171	arcA	Arginine deiminase	0.05			317	1	65.022	N
P13981	PA5171	arcA	Arginine deiminase	0.05			74	1	228.15	N
P13981	PA5171	arcA	Arginine deiminase	0.05			139	1	123.14	N
P13981	PA5171	arcA	Arginine deiminase	0.05			36	1	123.55	N
P13981	PA5171	arcA	Arginine deiminase	0.05			375	1	90.761	N
P13981	PA5171	arcA	Arginine deiminase	0.05			346	1	126.19	N
P14165	PA1580	gltA	Citrate synthase	0.05			296	1	82.417	N
P14165	PA1580	gltA	Citrate synthase	0.05			269	1	89.129	N
P14165	PA1580	gltA	Citrate synthase	0.05			284	1	72.184	N
P20582	PA0999	pqsD	Anthraniloyl-CoA anthraniloyltransferase	0.2			28	1	51.013	N
P21175	PA1074	braC	Leucine-, isoleucine-, valine-, threonine-, and alanine-binding protein	0.1			336	1	158.44	N
P21175	PA1074	braC	Leucine-, isoleucine-, valine-, threonine-, and alanine-binding protein	0.1			257	1	47.757	N
P23926	PA1544	anr	Transcriptional activator protein anr	0.6			171	1	44.612	N
P26276	PA5322	algC	Phosphomannomutase/phosphoglucomutase	0.1			141	1	133.84	N
P26480	PA0576	rpoD	RNA polymerase sigma factor RpoD	0.1			572	1	48.729	N
P26480	PA0576	rpoD	RNA polymerase sigma factor RpoD	0.1			465	1	85.813	N
P29363	PA3735	thrC	Threonine synthase	0.2			283	1	46.566	N
P29363	PA3735	thrC	Threonine synthase	0.2			256	1	49.188	N
P29365	PA3736	hom	Homoserine dehydrogenase	0.3			409	1	111.4	N
P30718	PA4385	groL	60 kDa chaperonin	0.05			433	1	243.24	N
P30718	PA4385	groL	60 kDa chaperonin	0.05			82	1	184.59	N
P30718	PA4385	groL	60 kDa chaperonin	0.05			112	1	92.856	N
P30718	PA4385	groL	60 kDa chaperonin	0.05			185	1	164.01	N
P30718	PA4385	groL	60 kDa chaperonin	0.05			329	1	193.51	N
P30718	PA4385	groL	60 kDa chaperonin	0.05			37	1	110.63	N
P30718	PA4385	groL	60 kDa chaperonin	0.05			206	1	71.149	N
P30718	PA4385	groL	60 kDa chaperonin	0.05			229	1	87.287	N
P30718	PA4385	groL	60 kDa chaperonin	0.05			21	1	152.7	N
P30718	PA4385	groL	60 kDa chaperonin	0.05			326	1	170.18	N
P30720	PA4386	groS	10 kDa chaperonin	0.1			36	1	100.77	N
P30720	PA4386	groS	10 kDa chaperonin	0.1			51	1	88.942	N
P30720	PA4386	groS	10 kDa chaperonin	0.1			74	1	123.96	N
P33641	PA4545	bamD	Outer membrane protein assembly factor BamD	0.4			48	1	66.351	N
P37798	PA4848	accC	Biotin carboxylase	0.1			206	1	89.903	N
P37798	PA4848	accC	Biotin carboxylase	0.1			281	1	49.12	N
P37798	PA4848	accC	Biotin carboxylase	0.1			404	1	66.387	N
P37798	PA4848	accC	Biotin carboxylase	0.1			417	1	89.403	N
P37798	PA4848	accC	Biotin carboxylase	0.1			9	1	115.01	N
P38098	PA4758	carA	Carbamoyl-phosphate synthase small chain	0.2			91	1	85.958	N
P38098	PA4758	carA	Carbamoyl-phosphate synthase small chain	0.2			176	1	148.76	N
P38100	PA4756	carB	Carbamoyl-phosphate synthase large chain	0.2			119	1	111.66	N
P38100	PA4756	carB	Carbamoyl-phosphate synthase large chain	0.2			202	1	42.64	N
P38100	PA4756	carB	Carbamoyl-phosphate synthase large chain	0.2			569	1	66.435	N
P38100	PA4756	carB	Carbamoyl-phosphate synthase large chain	0.2			416	1	103.79	N
P40947	PA4232	ssb	Single-stranded DNA-binding protein	0.2			13	1	83.499	N
P47204	PA4407	ftsZ	Cell division protein FtsZ	0.2			247	1	111.49	N
P47204	PA4407	ftsZ	Cell division protein FtsZ	0.2			74	1	99.973	N
P47205	PA4406	lpxC	UDP-3-O-acyl-N-acetylglucosamine deacetylase	0.1			56	1	73.498	N
P47205	PA4406	lpxC	UDP-3-O-acyl-N-acetylglucosamine deacetylase	0.1			224	1	65.038	N
P50601	PA0972	tolB	Protein TolB	0.1			266	1	96.489	N
P50601	PA0972	tolB	Protein TolB	0.1			432	1	72.789	N
P50601	PA0972	tolB	Protein TolB	0.1			176	1	60.478	N
P53593	PA1588	sucC	Succinate--CoA ligase [ADP-forming] subunit beta	0.05			317	1	169.21	N
P53593	PA1588	sucC	Succinate--CoA ligase [ADP-forming] subunit beta	0.05			208	1	83.182	N
P53593	PA1588	sucC	Succinate--CoA ligase [ADP-forming] subunit beta	0.05			310	1	123.92	N
P53593	PA1588	sucC	Succinate--CoA ligase [ADP-forming] subunit beta	0.05			217	1	202.44	N
P53593	PA1588	sucC	Succinate--CoA ligase [ADP-forming] subunit beta	0.05			221	1	112.71	N
P53593	PA1588	sucC	Succinate--CoA ligase [ADP-forming] subunit beta	0.05			2	1	90.919	N
P53593	PA1588	sucC	Succinate--CoA ligase [ADP-forming] subunit beta	0.05			80	1	178.03	N
P57112	PA2991	sthA	Soluble pyridine nucleotide transhydrogenase	0.1			297	1	96.331	N
P57112	PA2991	sthA	Soluble pyridine nucleotide transhydrogenase	0.1			281	1	104.26	N
P57668	PA2532	tpx	Thiol peroxidase	0.3			116	1	102.21	N
P57668	PA2532	tpx	Thiol peroxidase	0.3			68	1	60.019	N
P57668	PA2532	tpx	Thiol peroxidase	0.3			50	1	79.013	N
P72151	PA1092	fliC	B-type flagellin	0.05			306	1	109.44	N
P72151	PA1092	fliC	B-type flagellin	0.05			39	1	150.91	N
P72151	PA1092	fliC	B-type flagellin	0.05			292	1	122.33	N
P72151	PA1092	fliC	B-type flagellin	0.05			62	1	97.297	N
P72151	PA1092	fliC	B-type flagellin	0.05			231	1	58.955	N
P72151	PA1092	fliC	B-type flagellin	0.05			209	1	56.043	N
P72170	PA3527	pyrC	Dihydroorotase	0.3			25	1	51.771	N
P72173	PA3139	aspC	Aspartate aminotransferase	0.1			169	1	63.181	N
P72173	PA3139	aspC	Aspartate aminotransferase	0.1			383	1	58.917	N
P72173	PA3139	aspC	Aspartate aminotransferase	0.1			87	1	98.337	N
P72173	PA3139	aspC	Aspartate aminotransferase	0.1			386	1	116.05	N
P95459	PA3266	cspA	Major cold shock protein CspA	0.4			27	1	101.9	N
Q01609	PA2218	PA2218	Uncharacterized protein PA2218	1			3	1	64.757	N
Q51342	PA3108	purF	Amidophosphoribosyltransferase	0.2			500	1	66.533	N
Q51342	PA3108	purF	Amidophosphoribosyltransferase	0.2			313	1	56.432	N
Q51344	PA3117	asd	Aspartate-semialdehyde dehydrogenase	0.2			115	1	80.706	N
Q51423	PA0964	pmpR	Transcriptional regulatory protein PmpR	0.7			60	1	116.73	N
Q51561	PA4270	rpoB	DNA-directed RNA polymerase subunit beta	0.05			319	1	70.994	N
Q51561	PA4270	rpoB	DNA-directed RNA polymerase subunit beta	0.05			966	1	102.58	N
Q51561	PA4270	rpoB	DNA-directed RNA polymerase subunit beta	0.05			392	1	75.445	N
Q51561	PA4270	rpoB	DNA-directed RNA polymerase subunit beta	0.05			242	1	125.75	N
Q51561	PA4270	rpoB	DNA-directed RNA polymerase subunit beta	0.05			455	1	93.623	N
Q51561	PA4270	rpoB	DNA-directed RNA polymerase subunit beta	0.05			645	1	101.65	N
Q51561	PA4270	rpoB	DNA-directed RNA polymerase subunit beta	0.05			344	1	122.49	N
Q51561	PA4270	rpoB	DNA-directed RNA polymerase subunit beta	0.05			1251	1	96.64	N
Q51561	PA4270	rpoB	DNA-directed RNA polymerase subunit beta	0.05			1339	1	65.219	N
Q51561	PA4270	rpoB	DNA-directed RNA polymerase subunit beta	0.05			1322	1	61.577	N
Q51561	PA4270	rpoB	DNA-directed RNA polymerase subunit beta	0.05			587	1	119.39	N
Q51567	PA1589	sucD	Succinate--CoA ligase [ADP-forming] subunit alpha	0.05			55	1	94.461	N
Q51567	PA1589	sucD	Succinate--CoA ligase [ADP-forming] subunit alpha	0.05			123	1	87.148	N
Q51567	PA1589	sucD	Succinate--CoA ligase [ADP-forming] subunit alpha	0.05			6	1	107.21	N
Q59636	PA3807	ndk	Nucleoside diphosphate kinase	0.1			114	1	124.86	N
Q59636	PA3807	ndk	Nucleoside diphosphate kinase	0.1			86	1	41.401	N
Q59636	PA3807	ndk	Nucleoside diphosphate kinase	0.1			18	1	79.974	N
Q59637	PA5015	aceE	Pyruvate dehydrogenase E1 component	0.05			355	1	90.653	N
Q59637	PA5015	aceE	Pyruvate dehydrogenase E1 component	0.05			247	1	79.639	N
Q59637	PA5015	aceE	Pyruvate dehydrogenase E1 component	0.05			741	1	78.708	N
Q59637	PA5015	aceE	Pyruvate dehydrogenase E1 component	0.05			56	1	83.081	N
Q59637	PA5015	aceE	Pyruvate dehydrogenase E1 component	0.05			83	1	78.324	N
Q59638	PA5016	aceF	Dihydrolipoyllysine-residue acetyltransferase component of pyruvate dehydrogenase complex	0.1			134	1	41.117	N
Q59638	PA5016	aceF	Dihydrolipoyllysine-residue acetyltransferase component of pyruvate dehydrogenase complex	0.1			395	1	41.838	N
Q59638	PA5016	aceF	Dihydrolipoyllysine-residue acetyltransferase component of pyruvate dehydrogenase complex	0.1			334	1	115.78	N
Q59638	PA5016	aceF	Dihydrolipoyllysine-residue acetyltransferase component of pyruvate dehydrogenase complex	0.1			524	1	51.335	N
Q59643	PA5243	hemB	Delta-aminolevulinic acid dehydratase	0.1			7	1	52.683	N
Q9HT18	PA5556	atpA	ATP synthase subunit alpha	0.05			494	1	132.32	N
Q9HT18	PA5556	atpA	ATP synthase subunit alpha	0.05			488	1	210.09	N
Q9HT18	PA5556	atpA	ATP synthase subunit alpha	0.05			28	1	99.566	N
Q9HT18	PA5556	atpA	ATP synthase subunit alpha	0.05			114	1	120.77	N
Q9HT19	PA5555	atpG	ATP synthase gamma chain	0.1			22	1	84.743	N
Q9HT19	PA5555	atpG	ATP synthase gamma chain	0.1			173	1	110.36	N
Q9HT19	PA5555	atpG	ATP synthase gamma chain	0.1			132	1	107.24	N
Q9HT19	PA5555	atpG	ATP synthase gamma chain	0.1			147	1	71.927	N
Q9HT20	PA5554	atpD	ATP synthase subunit beta	0.05			196	1	109.37	N
Q9HT20	PA5554	atpD	ATP synthase subunit beta	0.05			242	1	132.84	N
Q9HT20	PA5554	atpD	ATP synthase subunit beta	0.05			186	1	81.904	N
Q9HT20	PA5554	atpD	ATP synthase subunit beta	0.05			66	1	163.99	N
Q9HT20	PA5554	atpD	ATP synthase subunit beta	0.05			92	1	177.88	N
Q9HT20	PA5554	atpD	ATP synthase subunit beta	0.05			164	1	149.47	N
Q9HT20	PA5554	atpD	ATP synthase subunit beta	0.05			157	1	107.79	N
Q9HT70	PA5503	metN2	Methionine import ATP-binding protein MetN 2	0.6			52	1	65.043	N
Q9HTD7	PA5429	aspA	Aspartate ammonia-lyase	0.2			399	1	84.297	N
Q9HTD7	PA5429	aspA	Aspartate ammonia-lyase	0.2			463	1	91.317	N
Q9HTD7	PA5429	aspA	Aspartate ammonia-lyase	0.2			64	1	87.181	N
Q9HTF1	PA5413	ltaE	Low specificity L-threonine aldolase	0.2			265	1	46.426	N
Q9HTJ1	PA5373	betB	NAD/NADP-dependent betaine aldehyde dehydrogenase	0.2			83	1	52.91	N
Q9HTN9	PA5315	rpmG	50S ribosomal protein L33	0.4			22	1	139.67	N
Q9HTQ0	PA5304	dadA1	D-amino acid dehydrogenase 1	0.1			418	1	90.657	N
Q9HTQ6	PA5298	xpt	Xanthine phosphoribosyltransferase	1			90	1	69.825	N
Q9HTV1	PA5239	rho	Transcription termination factor Rho	0.2			275	1	105.98	N
Q9HTV1	PA5239	rho	Transcription termination factor Rho	0.2			2	1	64.757	N
Q9HTV1	PA5239	rho	Transcription termination factor Rho	0.2			409	1	91.584	N
Q9HTX6	PA5214	gcvH2	Glycine cleavage system H protein 2	0.9			3	1	58.433	N
Q9HTZ7	PA5192	pckA	Phosphoenolpyruvate carboxykinase (ATP)	0.1			284	1	167.23	N
Q9HTZ7	PA5192	pckA	Phosphoenolpyruvate carboxykinase (ATP)	0.1			427	1	46.426	N
Q9HTZ7	PA5192	pckA	Phosphoenolpyruvate carboxykinase (ATP)	0.1			496	1	94.407	N
Q9HTZ7	PA5192	pckA	Phosphoenolpyruvate carboxykinase (ATP)	0.1			412	1	48.899	N
Q9HTZ7	PA5192	pckA	Phosphoenolpyruvate carboxykinase (ATP)	0.1			252	1	116.48	N
Q9HU15	PA5174	fabY	Beta-ketoacyl-[acyl-carrier-protein] synthase FabY	0.1			516	1	49.59	N
Q9HU53	PA5131	gpmI	2,3-bisphosphoglycerate-independent phosphoglycerate mutase	0.1			280	1	65.179	N
Q9HU56	PA5128	secB	Protein-export protein SecB	0.2			123	1	54.982	N
Q9HU65	PA5119	glnA	Glutamine synthetase	0.1			227	1	89.55	N
Q9HU65	PA5119	glnA	Glutamine synthetase	0.1			245	1	76.073	N
Q9HU66	PA5118	thiI	tRNA sulfurtransferase	0.9			450	1	56.258	N
Q9HU73	PA5110	fbp	Fructose-1,6-bisphosphatase class 1	0.2			18	1	51.092	N
Q9HUA5	PA5078	opgG	Glucans biosynthesis protein G	0.1			136	1	53.775	N
Q9HUA5	PA5078	opgG	Glucans biosynthesis protein G	0.1			109	1	87.287	N
Q9HUA5	PA5078	opgG	Glucans biosynthesis protein G	0.1			478	1	62.842	N
Q9HUC0	PA5063	ubiE	Ubiquinone/menaquinone biosynthesis C-methyltransferase UbiE	0.2			102	1	52.814	N
Q9HUC0	PA5063	ubiE	Ubiquinone/menaquinone biosynthesis C-methyltransferase UbiE	0.2			205	1	121.73	N
Q9HUC0	PA5063	ubiE	Ubiquinone/menaquinone biosynthesis C-methyltransferase UbiE	0.2			45	1	107.93	N
Q9HUC5	PA5054	hslU	ATP-dependent protease ATPase subunit HslU	0.3			266	1	58.592	N
Q9HUC5	PA5054	hslU	ATP-dependent protease ATPase subunit HslU	0.3			74	1	69.198	N
Q9HUC5	PA5054	hslU	ATP-dependent protease ATPase subunit HslU	0.3			235	1	83.499	N
Q9HUC5	PA5054	hslU	ATP-dependent protease ATPase subunit HslU	0.3			154	1	79.022	N
Q9HUC8	PA5051	argS	Arginine--tRNA ligase	0.2			46	1	87.519	N
Q9HUC8	PA5051	argS	Arginine--tRNA ligase	0.2			128	1	65.842	N
Q9HUD0	PA5049	rpmE	50S ribosomal protein L31	0.1			20	1	82.885	N
Q9HUM0	PA4944	hfq	RNA-binding protein Hfq	0.05			81	1	85.821	N
Q9HUM6	PA4938	purA	Adenylosuccinate synthetase	0.2			323	1	71.692	N
Q9HUM6	PA4938	purA	Adenylosuccinate synthetase	0.2			4	1	104.73	N
Q9HUM6	PA4938	purA	Adenylosuccinate synthetase	0.2			394	1	163.9	N
Q9HUM9	PA4935	rpsF	30S ribosomal protein S6	0.05			63	1	94.688	N
Q9HUM9	PA4935	rpsF	30S ribosomal protein S6	0.05			77	1	207.29	N
Q9HUM9	PA4935	rpsF	30S ribosomal protein S6	0.05			81	1	105.25	N
Q9HUM9	PA4935	rpsF	30S ribosomal protein S6	0.05			110	1	172.81	N
Q9HUM9	PA4935	rpsF	30S ribosomal protein S6	0.05			136	1	171.46	N
Q9HUN0	PA4934	rpsR	30S ribosomal protein S18	0.05			27	1	85.066	N
Q9HUN2	PA4932	rplI	50S ribosomal protein L9	0.1			43	1	212.2	N
Q9HUN2	PA4932	rplI	50S ribosomal protein L9	0.1			28	1	114.72	N
Q9HUV8	PA4855	purD	Phosphoribosylamine--glycine ligase	0.2			2	1	41.401	N
Q9HUV9	PA4854	purH	Bifunctional purine biosynthesis protein PurH	0.2			328	1	79.511	N
Q9HUV9	PA4854	purH	Bifunctional purine biosynthesis protein PurH	0.2			493	1	50.04	N
Q9HUV9	PA4854	purH	Bifunctional purine biosynthesis protein PurH	0.2			512	1	76.733	N
Q9HUV9	PA4854	purH	Bifunctional purine biosynthesis protein PurH	0.2			291	1	40.349	N
Q9HUV9	PA4854	purH	Bifunctional purine biosynthesis protein PurH	0.2			436	1	66.073	N
Q9HV42	PA4762	grpE	Protein GrpE	0.2			91	1	76.85	N
Q9HV43	PA4761	dnaK	Chaperone protein DnaK	0.05			636	1	140.81	N
Q9HV43	PA4761	dnaK	Chaperone protein DnaK	0.05			522	1	188.87	N
Q9HV43	PA4761	dnaK	Chaperone protein DnaK	0.05			366	1	149.04	N
Q9HV43	PA4761	dnaK	Chaperone protein DnaK	0.05			251	1	73.616	N
Q9HV43	PA4761	dnaK	Chaperone protein DnaK	0.05			170	1	120.14	N
Q9HV43	PA4761	dnaK	Chaperone protein DnaK	0.05			589	1	218.54	N
Q9HV43	PA4761	dnaK	Chaperone protein DnaK	0.05			415	1	45.997	N
Q9HV43	PA4761	dnaK	Chaperone protein DnaK	0.05			29	1	109.29	N
Q9HV44	PA4760	dnaJ	Chaperone protein DnaJ	0.2			51	1	110.97	N
Q9HV44	PA4760	dnaJ	Chaperone protein DnaJ	0.2			337	1	75.088	N
Q9HV46	PA4755	greA	Transcription elongation factor GreA	0.3			45	1	58.079	N
Q9HV46	PA4755	greA	Transcription elongation factor GreA	0.3			123	1	76.221	N
Q9HV50	PA4749	glmM	Phosphoglucosamine mutase	0.2			151	1	53.17	N
Q9HV55	PA4744	infB	Translation initiation factor IF-2	0.05			744	1	98.044	N
Q9HV55	PA4744	infB	Translation initiation factor IF-2	0.05			262	1	103.2	N
Q9HV55	PA4744	infB	Translation initiation factor IF-2	0.05			820	1	55.441	N
Q9HV58	PA4741	rpsO	30S ribosomal protein S15	0.05			13	1	89.296	N
Q9HV59	PA4740	pnp	Polyribonucleotide nucleotidyltransferase	0.05			239	1	167.2	N
Q9HV59	PA4740	pnp	Polyribonucleotide nucleotidyltransferase	0.05			513	1	100.21	N
Q9HV59	PA4740	pnp	Polyribonucleotide nucleotidyltransferase	0.05			641	1	51.135	N
Q9HV59	PA4740	pnp	Polyribonucleotide nucleotidyltransferase	0.05			533	1	208.82	N
Q9HV59	PA4740	pnp	Polyribonucleotide nucleotidyltransferase	0.05			682	1	85.731	N
Q9HV67	PA4732	pgi	Glucose-6-phosphate isomerase	0.2			201	1	58.071	N
Q9HV70	PA4729	panB2	3-methyl-2-oxobutanoate hydroxymethyltransferase 2	0.3			265	1	53.448	N
Q9HVA2	PA4694	ilvC	Ketol-acid reductoisomerase (NADP(+))	0.05			330	1	90.629	N
Q9HVA2	PA4694	ilvC	Ketol-acid reductoisomerase (NADP(+))	0.05			96	1	112.51	N
Q9HVA2	PA4694	ilvC	Ketol-acid reductoisomerase (NADP(+))	0.05			297	1	87.429	N
Q9HVA2	PA4694	ilvC	Ketol-acid reductoisomerase (NADP(+))	0.05			162	1	53.3	N
Q9HVC4	PA4671	rplY	50S ribosomal protein L25	0.05			56	1	159.04	N
Q9HVC4	PA4671	rplY	50S ribosomal protein L25	0.05			67	1	149.57	N
Q9HVC4	PA4671	rplY	50S ribosomal protein L25	0.05			113	1	135.18	N
Q9HVC5	PA4670	prs	Ribose-phosphate pyrophosphokinase	0.05			304	1	123.95	N
Q9HVC5	PA4670	prs	Ribose-phosphate pyrophosphokinase	0.05			123	1	49.423	N
Q9HVF1	PA4640	mqo2	Probable malate:quinone oxidoreductase 2	0.1			86	1	54.023	N
Q9HVF1	PA4640	mqo2	Probable malate:quinone oxidoreductase 2	0.1			355	1	51.854	N
Q9HVI7	PA4602	glyA2	Serine hydroxymethyltransferase 3	0.2			344	1	90.986	N
Q9HVI7	PA4602	glyA2	Serine hydroxymethyltransferase 3	0.2			391	1	100.19	N
Q9HVI7	PA4602	glyA2	Serine hydroxymethyltransferase 3	0.2			417	1	89.775	N
Q9HVI7	PA4602	glyA2	Serine hydroxymethyltransferase 3	0.2			252	1	107.41	N
Q9HVL6	PA4568	rplU	50S ribosomal protein L21	0.05			43	1	93.058	N
Q9HVL7	PA4567	rpmA	50S ribosomal protein L27	0.2			35	1	86.866	N
Q9HVM1	PA4563	rpsT	30S ribosomal protein S20	0.05			3	1	111.82	N
Q9HVM1	PA4563	rpsT	30S ribosomal protein S20	0.05			21	1	43.808	N
Q9HVM1	PA4563	rpsT	30S ribosomal protein S20	0.05			34	1	67.032	N
Q9HVM4	PA4560	ileS	Isoleucine--tRNA ligase	0.2			932	1	51.463	N
Q9HVM4	PA4560	ileS	Isoleucine--tRNA ligase	0.2			301	1	52.725	N
Q9HVM4	PA4560	ileS	Isoleucine--tRNA ligase	0.2			531	1	117.74	N
Q9HVM4	PA4560	ileS	Isoleucine--tRNA ligase	0.2			149	1	43.544	N
Q9HVM7	PA4557	ispH	4-hydroxy-3-methylbut-2-enyl diphosphate reductase	0.7			23	1	60.961	N
Q9HVN5	PA4542	clpB	Chaperone protein ClpB	0.1			225	1	77.776	N
Q9HVN5	PA4542	clpB	Chaperone protein ClpB	0.1			529	1	125.52	N
Q9HVT7	PA4484	gatB	Aspartyl/glutamyl-tRNA(Asn/Gln) amidotransferase subunit B	0.2			254	1	81.017	N
Q9HVT7	PA4484	gatB	Aspartyl/glutamyl-tRNA(Asn/Gln) amidotransferase subunit B	0.2			186	1	83.692	N
Q9HVT8	PA4483	gatA	Glutamyl-tRNA(Gln) amidotransferase subunit A	0.2			318	1	71.295	N
Q9HVT8	PA4483	gatA	Glutamyl-tRNA(Gln) amidotransferase subunit A	0.2			96	1	56.817	N
Q9HVW0	PA4457	kdsD	Arabinose 5-phosphate isomerase KdsD	0.5			297	1	62.978	N
Q9HVW7	PA4450	murA	UDP-N-acetylglucosamine 1-carboxyvinyltransferase	0.1			342	1	72.79	N
Q9HVW7	PA4450	murA	UDP-N-acetylglucosamine 1-carboxyvinyltransferase	0.1			10	1	86.953	N
Q9HVW7	PA4450	murA	UDP-N-acetylglucosamine 1-carboxyvinyltransferase	0.1			71	1	128.01	N
Q9HVW9	PA4448	hisD	Histidinol dehydrogenase	0.2			175	1	45.916	N
Q9HVX6	PA4439	trpS	Tryptophan--tRNA ligase	0.3			193	1	74.584	N
Q9HVY2	PA4433	rplM	50S ribosomal protein L13	0.05			88	1	89.369	N
Q9HW04	PA4402	argJ	Arginine biosynthesis bifunctional protein ArgJ	0.3			318	1	76.522	N
Q9HW11	PA4395	PA4395	UPF0234 protein PA4395	0.7			65	1	61.837	N
Q9HW91	PA4310	pctB	Methyl-accepting chemotaxis protein PctB	0.3			184	1	70.352	N
Q9HWC5	PA4274	rplK	50S ribosomal protein L11	0.05			139	1	93.561	N
Q9HWC6	PA4273	rplA	50S ribosomal protein L1	0.05			47	1	100.69	N
Q9HWC6	PA4273	rplA	50S ribosomal protein L1	0.05			110	1	250.53	N
Q9HWC6	PA4273	rplA	50S ribosomal protein L1	0.05			139	1	75.131	N
Q9HWC7	PA4272	rplJ	50S ribosomal protein L10	0.1			16	1	134.25	N
Q9HWC9	PA4269	rpoC	DNA-directed RNA polymerase subunit beta'	0.05			320	1	78.513	N
Q9HWC9	PA4269	rpoC	DNA-directed RNA polymerase subunit beta'	0.05			700	1	60.118	N
Q9HWC9	PA4269	rpoC	DNA-directed RNA polymerase subunit beta'	0.05			690	1	155.88	N
Q9HWC9	PA4269	rpoC	DNA-directed RNA polymerase subunit beta'	0.05			424	1	67.169	N
Q9HWC9	PA4269	rpoC	DNA-directed RNA polymerase subunit beta'	0.05			1350	1	79.489	N
Q9HWC9	PA4269	rpoC	DNA-directed RNA polymerase subunit beta'	0.05			266	1	43.604	N
Q9HWC9	PA4269	rpoC	DNA-directed RNA polymerase subunit beta'	0.05			762	1	122.44	N
Q9HWC9	PA4269	rpoC	DNA-directed RNA polymerase subunit beta'	0.05			655	1	113.71	N
Q9HWC9	PA4269	rpoC	DNA-directed RNA polymerase subunit beta'	0.05			1249	1	76.522	N
Q9HWC9	PA4269	rpoC	DNA-directed RNA polymerase subunit beta'	0.05			1180	1	65.47	N
Q9HWC9	PA4269	rpoC	DNA-directed RNA polymerase subunit beta'	0.05			6	1	77.662	N
Q9HWC9	PA4269	rpoC	DNA-directed RNA polymerase subunit beta'	0.05			792	1	90.906	N
Q9HWC9	PA4269	rpoC	DNA-directed RNA polymerase subunit beta'	0.05			1235	1	157.96	N
Q9HWD0	PA4268	rpsL	30S ribosomal protein S12	0.05			46	1	65.252	N
Q9HWD1	PA4267	rpsG	30S ribosomal protein S7	0.05			28	1	106.67	N
Q9HWD1	PA4267	rpsG	30S ribosomal protein S7	0.05			148	1	71.359	N
Q9HWD1	PA4267	rpsG	30S ribosomal protein S7	0.05			97	1	71.258	N
Q9HWD2	PA4266	fusA	Elongation factor G 1	0.05			194	1	88.935	N
Q9HWD2	PA4266	fusA	Elongation factor G 1	0.05			592	1	138.3	N
Q9HWD2	PA4266	fusA	Elongation factor G 1	0.05			498	1	172.23	N
Q9HWD2	PA4266	fusA	Elongation factor G 1	0.05			81	1	106.43	N
Q9HWD2	PA4266	fusA	Elongation factor G 1	0.05			314	1	109.68	N
Q9HWD2	PA4266	fusA	Elongation factor G 1	0.05			142	1	96.839	N
Q9HWD2	PA4266	fusA	Elongation factor G 1	0.05			12	1	54.871	N
Q9HWD2	PA4266	fusA	Elongation factor G 1	0.05			230	1	204.85	N
Q9HWD2	PA4266	fusA	Elongation factor G 1	0.05			235	1	206	N
Q9HWD2	PA4266	fusA	Elongation factor G 1	0.05			8	1	56.51	N
Q9HWD2	PA4266	fusA	Elongation factor G 1	0.05			37	1	105.4	N
Q9HWD2	PA4266	fusA	Elongation factor G 1	0.05			85	1	163.79	N
Q9HWD2	PA4266	fusA	Elongation factor G 1	0.05			351	1	110.22	N
Q9HWD2	PA4266	fusA	Elongation factor G 1	0.05			696	1	107.09	N
Q9HWD4	PA4264	rpsJ	30S ribosomal protein S10	0.2			58	1	139.86	N
Q9HWD5	PA4263	rplC	50S ribosomal protein L3	0.05			73	1	86.866	N
Q9HWD5	PA4263	rplC	50S ribosomal protein L3	0.05			33	1	134.98	N
Q9HWD5	PA4263	rplC	50S ribosomal protein L3	0.05			185	1	101.33	N
Q9HWD6	PA4262	rplD	50S ribosomal protein L4	0.05			155	1	117.4	N
Q9HWD6	PA4262	rplD	50S ribosomal protein L4	0.05			162	1	75.378	N
Q9HWD7	PA4261	rplW	50S ribosomal protein L23	0.05			77	1	43	N
Q9HWD7	PA4261	rplW	50S ribosomal protein L23	0.05			61	1	101.69	N
Q9HWD8	PA4260	rplB	50S ribosomal protein L2	0.05			128	1	93.374	N
Q9HWD8	PA4260	rplB	50S ribosomal protein L2	0.05			197	1	52.527	N
Q9HWD8	PA4260	rplB	50S ribosomal protein L2	0.05			226	1	61.962	N
Q9HWD8	PA4260	rplB	50S ribosomal protein L2	0.05			134	1	45.704	N
Q9HWD8	PA4260	rplB	50S ribosomal protein L2	0.05			70	1	82.85	N
Q9HWD8	PA4260	rplB	50S ribosomal protein L2	0.05			261	1	86.911	N
Q9HWD8	PA4260	rplB	50S ribosomal protein L2	0.05			266	1	66.993	N
Q9HWD8	PA4260	rplB	50S ribosomal protein L2	0.05			86	1	119.89	N
Q9HWD9	PA4259	rpsS	30S ribosomal protein S19	0.2			26	1	94.747	N
Q9HWD9	PA4259	rpsS	30S ribosomal protein S19	0.2			63	1	87.083	N
Q9HWE0	PA4258	rplV	50S ribosomal protein L22	0.05			34	1	145.14	N
Q9HWE0	PA4258	rplV	50S ribosomal protein L22	0.05			77	1	170.5	N
Q9HWE1	PA4257	rpsC	30S ribosomal protein S3	0.05			28	1	116.55	N
Q9HWE3	PA4255	rpmC	50S ribosomal protein L29	0.2			4	1	49.097	N
Q9HWE6	PA4252	rplX	50S ribosomal protein L24	0.05			68	1	175.69	N
Q9HWE6	PA4252	rplX	50S ribosomal protein L24	0.05			73	1	166.27	N
Q9HWE6	PA4252	rplX	50S ribosomal protein L24	0.05			48	1	154.51	N
Q9HWE6	PA4252	rplX	50S ribosomal protein L24	0.05			39	1	125.25	N
Q9HWE7	PA4251	rplE	50S ribosomal protein L5	0.05			179	1	75.213	N
Q9HWE7	PA4251	rplE	50S ribosomal protein L5	0.05			127	1	110.41	N
Q9HWE7	PA4251	rplE	50S ribosomal protein L5	0.05			52	1	161.19	N
Q9HWE7	PA4251	rplE	50S ribosomal protein L5	0.05			37	1	142.54	N
Q9HWE9	PA4249	rpsH	30S ribosomal protein S8	0.2			107	1	156.83	N
Q9HWF0	PA4248	rplF	50S ribosomal protein L6	0.05			7	1	74.46	N
Q9HWF1	PA4247	rplR	50S ribosomal protein L18	0.05			66	1	83.869	N
Q9HWF3	PA4245	rpmD	50S ribosomal protein L30	0.05			43	1	194.13	N
Q9HWF3	PA4245	rpmD	50S ribosomal protein L30	0.05			18	1	64.485	N
Q9HWF5	PA4243	secY	Protein translocase subunit SecY	0.1			340	1	80.438	N
Q9HWF7	PA4241	rpsM	30S ribosomal protein S13	0.1			105	1	64.776	N
Q9HWF8	PA4240	rpsK	30S ribosomal protein S11	0.1			101	1	58.981	N
Q9HWF8	PA4240	rpsK	30S ribosomal protein S11	0.1			85	1	115.46	N
Q9HWX4	PA4054	ribB	3,4-dihydroxy-2-butanone 4-phosphate synthase	0.3			4	1	46.964	N
Q9HWX4	PA4054	ribB	3,4-dihydroxy-2-butanone 4-phosphate synthase	0.3			46	1	49.444	N
Q9HWZ6	PA4031	ppa	Inorganic pyrophosphatase	0.4			158	1	79.201	N
Q9HX33	PA3987	leuS	Leucine--tRNA ligase	0.2			104	1	78.69	N
Q9HXE5	PA3861	rhlB	ATP-dependent RNA helicase RhlB	0.3			265	1	62.714	N
Q9HXH0	PA3834	valS	Valine--tRNA ligase	0.2			296	1	56.551	N
Q9HXH0	PA3834	valS	Valine--tRNA ligase	0.2			441	1	78.413	N
Q9HXH0	PA3834	valS	Valine--tRNA ligase	0.2			282	1	68.919	N
Q9HXH0	PA3834	valS	Valine--tRNA ligase	0.2			827	1	52.49	N
Q9HXI1	PA3821	secD	Protein translocase subunit SecD	0.05			552	1	51.346	N
Q9HXI1	PA3821	secD	Protein translocase subunit SecD	0.05			281	1	54.205	N
Q9HXI8	PA3814	iscS	Cysteine desulfurase IscS	0.05			53	1	117.04	N
Q9HXI8	PA3814	iscS	Cysteine desulfurase IscS	0.05			80	1	73.498	N
Q9HXJ5	PA3802	hisS	Histidine--tRNA ligase	0.3			396	1	85.522	N
Q9HXJ7	PA3800	bamB	Outer membrane protein assembly factor BamB	0.1			192	1	52.541	N
Q9HXM6	PA3769	guaA	GMP synthase [glutamine-hydrolyzing]	0.2			289	1	55.353	N
Q9HXM6	PA3769	guaA	GMP synthase [glutamine-hydrolyzing]	0.2			280	1	100.97	N
Q9HXN2	PA3763	purL	Phosphoribosylformylglycinamidine synthase	0.2			1228	1	42.914	N
Q9HXN2	PA3763	purL	Phosphoribosylformylglycinamidine synthase	0.2			1029	1	45.14	N
Q9HXN2	PA3763	purL	Phosphoribosylformylglycinamidine synthase	0.2			720	1	77.185	N
Q9HXN2	PA3763	purL	Phosphoribosylformylglycinamidine synthase	0.2			295	1	50.042	N
Q9HXP9	PA3745	rpsP	30S ribosomal protein S16	0.05			40	1	145.95	N
Q9HXP9	PA3745	rpsP	30S ribosomal protein S16	0.05			23	1	54.898	N
Q9HXQ2	PA3742	rplS	50S ribosomal protein L19	0.05			57	1	95.775	N
Q9HXQ2	PA3742	rplS	50S ribosomal protein L19	0.05			3	1	176.29	N
Q9HXU0	PA3700	lysS	Lysine--tRNA ligase	0.2			427	1	166.77	N
Q9HXU0	PA3700	lysS	Lysine--tRNA ligase	0.2			459	1	68.333	N
Q9HXU0	PA3700	lysS	Lysine--tRNA ligase	0.2			484	1	77.597	N
Q9HXU0	PA3700	lysS	Lysine--tRNA ligase	0.2			255	1	88.734	N
Q9HXU0	PA3700	lysS	Lysine--tRNA ligase	0.2			333	1	110.38	N
Q9HXU0	PA3700	lysS	Lysine--tRNA ligase	0.2			173	1	85.355	N
Q9HXY5	PA3647	PA3647	Skp-like protein	0.2			107	1	52.299	N
Q9HXY7	PA3645	fabZ	3-hydroxyacyl-[acyl-carrier-protein] dehydratase FabZ	0.1			5	1	77.732	N
Q9HXZ1	PA3640	dnaE	DNA polymerase III subunit alpha	0.4			574	1	51.335	N
Q9HXZ4	PA3637	pyrG	CTP synthase	0.1			228	1	99.568	N
Q9HXZ4	PA3637	pyrG	CTP synthase	0.1			323	1	86.935	N
Q9HXZ5	PA3635	eno	Enolase	0.1			102	1	73.91	N
Q9HXZ5	PA3635	eno	Enolase	0.1			336	1	88.37	N
Q9HXZ5	PA3635	eno	Enolase	0.1			109	1	50.608	N
Q9HY05	PA3625	surE	5'-nucleotidase SurE	0.5			131	1	58.487	N
Q9HY07	PA3621	fdxA	Ferredoxin 1	0.4			8	1	65.719	N
Q9HY84	PA3525	argG	Argininosuccinate synthase	0.1			81	1	145.8	N
Q9HY84	PA3525	argG	Argininosuccinate synthase	0.1			351	1	62.2	N
Q9HY84	PA3525	argG	Argininosuccinate synthase	0.1			367	1	122.68	N
Q9HY84	PA3525	argG	Argininosuccinate synthase	0.1			265	1	79.116	N
Q9HY84	PA3525	argG	Argininosuccinate synthase	0.1			108	1	160.13	N
Q9HY84	PA3525	argG	Argininosuccinate synthase	0.1			214	1	59.514	N
Q9HYC7	PA3482	metG	Methionine--tRNA ligase	0.2			451	1	81.632	N
Q9HYC7	PA3482	metG	Methionine--tRNA ligase	0.2			372	1	135.99	N
Q9HYC7	PA3482	metG	Methionine--tRNA ligase	0.2			636	1	73.885	N
Q9HYC7	PA3482	metG	Methionine--tRNA ligase	0.2			216	1	139.98	N
Q9HYC7	PA3482	metG	Methionine--tRNA ligase	0.2			381	1	68.224	N
Q9HYC9	PA3480	dcd	dCTP deaminase	0.4			58	1	68.121	N
Q9HYD5	PA3471	maeA	NAD-dependent malic enzyme	0.2			379	1	68.413	N
Q9HYF4	PA3452	mqo1	Probable malate:quinone oxidoreductase 1	0.3			202	1	50.102	N
Q9HYF4	PA3452	mqo1	Probable malate:quinone oxidoreductase 1	0.3			124	1	69.383	N
Q9HYV7	PA3286	PA3286	Beta-ketodecanoyl-[acyl-carrier-protein] synthase	0.2			67	1	110.12	N
Q9HZ55	PA3179	rluB	Ribosomal large subunit pseudouridine synthase B	0.4			121	1	104.84	N
Q9HZ63	PA3171	ubiG	Ubiquinone biosynthesis O-methyltransferase	0.3			3	1	67.08	N
Q9HZ65	PA3169	mtnA	Methylthioribose-1-phosphate isomerase	0.4			193	1	58.37	N
Q9HZ66	PA3167	serC	Phosphoserine aminotransferase	0.2			118	1	82.261	N
Q9HZ67	PA3166	pheA	P-protein	0.4			223	1	62.088	N
Q9HZ71	PA3162	rpsA	30S ribosomal protein S1	0.05			236	1	101.92	N
Q9HZ71	PA3162	rpsA	30S ribosomal protein S1	0.05			201	1	78.752	N
Q9HZ71	PA3162	rpsA	30S ribosomal protein S1	0.05			253	1	66.351	N
Q9HZ71	PA3162	rpsA	30S ribosomal protein S1	0.05			493	1	109.44	N
Q9HZ71	PA3162	rpsA	30S ribosomal protein S1	0.05			178	1	170.68	N
Q9HZ71	PA3162	rpsA	30S ribosomal protein S1	0.05			286	1	142.73	N
Q9HZ71	PA3162	rpsA	30S ribosomal protein S1	0.05			313	1	72.603	N
Q9HZ76	PA3155	wbpE	UDP-2-acetamido-2-deoxy-3-oxo-D-glucuronate aminotransferase	0.2			227	1	49.59	N
Q9HZA7	PA3112	accD	Acetyl-coenzyme A carboxylase carboxyl transferase subunit beta	0.3			151	1	97.635	N
Q9HZA7	PA3112	accD	Acetyl-coenzyme A carboxylase carboxyl transferase subunit beta	0.3			276	1	57.788	N
Q9HZE0	PA3068	gdhB	NAD-specific glutamate dehydrogenase	0.1			889	1	74.678	N
Q9HZE0	PA3068	gdhB	NAD-specific glutamate dehydrogenase	0.1			1035	1	42.773	N
Q9HZE0	PA3068	gdhB	NAD-specific glutamate dehydrogenase	0.1			1121	1	58.49	N
Q9HZE0	PA3068	gdhB	NAD-specific glutamate dehydrogenase	0.1			81	1	75.738	N
Q9HZJ2	PA3014	fadB	Fatty acid oxidation complex subunit alpha	0.1			629	1	45.369	N
Q9HZJ2	PA3014	fadB	Fatty acid oxidation complex subunit alpha	0.1			579	1	76.655	N
Q9HZJ5	PA3011	topA	DNA topoisomerase 1	0.2			358	1	65.252	N
Q9HZJ5	PA3011	topA	DNA topoisomerase 1	0.2			638	1	67.364	N
Q9HZK8	PA2997	nqrC	Na(+)-translocating NADH-quinone reductase subunit C	0.4			255	1	105.1	N
Q9HZN4	PA2970	rpmF	50S ribosomal protein L32	0.2			25	1	155.57	N
Q9HZP5	PA2953	PA2953	Electron transfer flavoprotein-ubiquinone oxidoreductase	0.1			389	1	55.353	N
Q9HZP6	PA2952	etfB	Electron transfer flavoprotein subunit beta	0.05			23	1	142.54	N
Q9HZP6	PA2952	etfB	Electron transfer flavoprotein subunit beta	0.05			30	1	143.38	N
Q9HZP6	PA2952	etfB	Electron transfer flavoprotein subunit beta	0.05			89	1	150.26	N
Q9HZP6	PA2952	etfB	Electron transfer flavoprotein subunit beta	0.05			244	1	48.115	N
Q9HZP6	PA2952	etfB	Electron transfer flavoprotein subunit beta	0.05			36	1	101.04	N
Q9HZP6	PA2952	etfB	Electron transfer flavoprotein subunit beta	0.05			14	1	91.041	N
Q9HZP6	PA2952	etfB	Electron transfer flavoprotein subunit beta	0.05			154	1	98.942	N
Q9HZP7	PA2951	etfA	Electron transfer flavoprotein subunit alpha	0.05			20	1	138.49	N
Q9HZP8	PA2950	fabV	Enoyl-[acyl-carrier-protein] reductase [NADH]	0.2			23	1	44.734	N
Q9HZP8	PA2950	fabV	Enoyl-[acyl-carrier-protein] reductase [NADH]	0.2			109	1	97.273	N
Q9HZZ2	PA2851	efp	Elongation factor P	0.1			43	1	53.567	N
Q9I0A1	PA2742	rpmI	50S ribosomal protein L35	#N/A			50	1	114.43	N
Q9I0A2	PA2741	rplT	50S ribosomal protein L20	0.05			101	1	134.25	N
Q9I0A3	PA2740	pheS	Phenylalanine--tRNA ligase alpha subunit	0.3			329	1	48.283	N
Q9I0I6	PA2652	PA2652	Methyl-accepting chemotaxis protein PA2652	0.4			273	1	45.707	N
Q9I0J6	PA2642	nuoG	NADH-quinone oxidoreductase subunit G	0.2			512	1	136.57	N
Q9I0J6	PA2642	nuoG	NADH-quinone oxidoreductase subunit G	0.2			322	1	68.847	N
Q9I0J6	PA2642	nuoG	NADH-quinone oxidoreductase subunit G	0.2			196	1	80.68	N
Q9I0J7	PA2641	nuoF	NADH-quinone oxidoreductase subunit F	0.2			91	1	43.124	N
Q9I0J7	PA2641	nuoF	NADH-quinone oxidoreductase subunit F	0.2			268	1	77.506	N
Q9I0J7	PA2641	nuoF	NADH-quinone oxidoreductase subunit F	0.2			105	1	137.19	N
Q9I0J9	PA2639	nuoC	NADH-quinone oxidoreductase subunit C/D	0.2			117	1	63.216	N
Q9I0J9	PA2639	nuoC	NADH-quinone oxidoreductase subunit C/D	0.2			537	1	60.062	N
Q9I0K4	PA2634	PA2634	Isocitrate lyase	0.2			412	1	50.353	N
Q9I0K9	PA2629	purB	Adenylosuccinate lyase	0.2			90	1	60.478	N
Q9I0M4	PA2614	lolA	Outer-membrane lipoprotein carrier protein	0.6			35	1	72.618	N
Q9I0Q0	PA2587	pqsH	2-heptyl-3-hydroxy-4(1H)-quinolone synthase	0.3			362	1	69.39	N
Q9I291	PA2023	galU	UTP--glucose-1-phosphate uridylyltransferase	0.3			186	1	146.06	N
Q9I2U0	PA1802	clpX	ATP-dependent Clp protease ATP-binding subunit ClpX	0.2			138	1	85.745	N
Q9I2U0	PA1802	clpX	ATP-dependent Clp protease ATP-binding subunit ClpX	0.2			115	1	96.745	N
Q9I2U2	PA1800	tig	Trigger factor	0.05			238	1	151.13	N
Q9I2U2	PA1800	tig	Trigger factor	0.05			165	1	171.32	N
Q9I2U2	PA1800	tig	Trigger factor	0.05			29	1	105.57	N
Q9I2U2	PA1800	tig	Trigger factor	0.05			85	1	131.83	N
Q9I2U2	PA1800	tig	Trigger factor	0.05			249	1	130.56	N
Q9I2U2	PA1800	tig	Trigger factor	0.05			139	1	102.5	N
Q9I2U2	PA1800	tig	Trigger factor	0.05			214	1	87.287	N
Q9I2U7	PA1795	cysS	Cysteine--tRNA ligase	0.3			76	1	96.306	N
Q9I2U8	PA1794	glnS	Glutamine--tRNA ligase	0.2			431	1	87.388	N
Q9I2U8	PA1794	glnS	Glutamine--tRNA ligase	0.2			71	1	145.58	N
Q9I2U8	PA1794	glnS	Glutamine--tRNA ligase	0.2			155	1	94.309	N
Q9I2V5	PA1787	acnB	Aconitate hydratase B	0.05			861	1	122.54	N
Q9I2V5	PA1787	acnB	Aconitate hydratase B	0.05			487	1	101.5	N
Q9I2V5	PA1787	acnB	Aconitate hydratase B	0.05			140	1	59.205	N
Q9I2V5	PA1787	acnB	Aconitate hydratase B	0.05			716	1	87.676	N
Q9I2V5	PA1787	acnB	Aconitate hydratase B	0.05			36	1	114.34	N
Q9I2V5	PA1787	acnB	Aconitate hydratase B	0.05			626	1	95.815	N
Q9I2V5	PA1787	acnB	Aconitate hydratase B	0.05			178	1	90.363	N
Q9I3C5	PA1596	htpG	Chaperone protein HtpG	0.05			234	1	188.96	N
Q9I3C5	PA1596	htpG	Chaperone protein HtpG	0.05			398	1	84.352	N
Q9I3C5	PA1596	htpG	Chaperone protein HtpG	0.05			41	1	110.25	N
Q9I3C5	PA1596	htpG	Chaperone protein HtpG	0.05			56	1	99.569	N
Q9I3C5	PA1596	htpG	Chaperone protein HtpG	0.05			334	1	190.46	N
Q9I3C5	PA1596	htpG	Chaperone protein HtpG	0.05			339	1	166.04	N
Q9I3D1	PA1587	lpdG	Dihydrolipoyl dehydrogenase	0.05			381	1	129.11	N
Q9I3D1	PA1587	lpdG	Dihydrolipoyl dehydrogenase	0.05			397	1	104.22	N
Q9I3D1	PA1587	lpdG	Dihydrolipoyl dehydrogenase	0.05			113	1	85.522	N
Q9I3D1	PA1587	lpdG	Dihydrolipoyl dehydrogenase	0.05			101	1	72.652	N
Q9I3D1	PA1587	lpdG	Dihydrolipoyl dehydrogenase	0.05			51	1	81.526	N
Q9I3D2	PA1586	sucB	Dihydrolipoyllysine-residue succinyltransferase component of 2-oxoglutarate dehydrogenase complex	0.05			129	1	139.81	N
Q9I3D2	PA1586	sucB	Dihydrolipoyllysine-residue succinyltransferase component of 2-oxoglutarate dehydrogenase complex	0.05			154	1	92.819	N
Q9I3D2	PA1586	sucB	Dihydrolipoyllysine-residue succinyltransferase component of 2-oxoglutarate dehydrogenase complex	0.05			77	1	115.78	N
Q9I3D2	PA1586	sucB	Dihydrolipoyllysine-residue succinyltransferase component of 2-oxoglutarate dehydrogenase complex	0.05			290	1	161.86	N
Q9I3D2	PA1586	sucB	Dihydrolipoyllysine-residue succinyltransferase component of 2-oxoglutarate dehydrogenase complex	0.05			305	1	116.61	N
Q9I3E3	PA1574	ppnP	Pyrimidine/purine nucleoside phosphorylase	0.3			5	1	45.939	N
Q9I3I5	PA1528	zipA	Cell division protein ZipA	0.3			45	1	102.33	N
Q9I3N3	PA1479	ccmE	Cytochrome c-type biogenesis protein CcmE	0.6			73	1	52.716	N
Q9I4P5	PA1084	flgI	Flagellar P-ring protein	#N/A			210	1	40.952	N
Q9I4W3	PA1010	dapA	4-hydroxy-tetrahydrodipicolinate synthase	0.3			248	1	55.452	N
Q9I4W9	PA1004	nadA	Quinolinate synthase A	0.5			100	1	52.403	N
Q9I4X2	PA0997	pqsB	2-heptyl-4(1H)-quinolone synthase subunit PqsB	0.3			91	1	57.5	N
Q9I4Z4	PA0973	pal	Peptidoglycan-associated lipoprotein	0.1			113	1	93.178	N
Q9I502	PA0956	proS	Proline--tRNA ligase	0.2			303	1	55.461	N
Q9I502	PA0956	proS	Proline--tRNA ligase	0.2			259	1	119.29	N
Q9I502	PA0956	proS	Proline--tRNA ligase	0.2			387	1	94.465	N
Q9I513	PA0945	purM	Phosphoribosylformylglycinamidine cyclo-ligase	0.4			258	1	56.514	N
Q9I553	PA0903	alaS	Alanine--tRNA ligase	0.2			539	1	74.92	N
Q9I553	PA0903	alaS	Alanine--tRNA ligase	0.2			408	1	101.42	N
Q9I553	PA0903	alaS	Alanine--tRNA ligase	0.2			621	1	180.62	N
Q9I583	PA0858	PA0858	UPF0176 protein PA0858	1			119	1	69.148	N
Q9I5A4	PA0836	ackA	Acetate kinase	0.3			244	1	56.648	N
Q9I5H9	PA0750	ung	Uracil-DNA glycosylase	0.8			159	1	123.92	N
Q9I5Q3	PA0668	tyrS2	Tyrosine--tRNA ligase 2	0.3			283	1	92.439	N
Q9I5Q3	PA0668	tyrS2	Tyrosine--tRNA ligase 2	0.3			100	1	94.309	N
Q9I5W0	PA0577	dnaG	DNA primase	1			283	1	40.085	N
Q9I5Y1	PA0555	fba	Fructose-bisphosphate aldolase	0.1			121	1	78.513	N
Q9I5Y1	PA0555	fba	Fructose-bisphosphate aldolase	0.1			275	1	56.043	N
Q9I5Y1	PA0555	fba	Fructose-bisphosphate aldolase	0.1			328	1	73.781	N
Q9I5Y4	PA0552	pgk	Phosphoglycerate kinase	0.2			111	1	78.342	N
Q9I5Y4	PA0552	pgk	Phosphoglycerate kinase	0.2			180	1	41.513	N
Q9I5Y4	PA0552	pgk	Phosphoglycerate kinase	0.2			121	1	133.23	N
Q9I5Y4	PA0552	pgk	Phosphoglycerate kinase	0.2			327	1	104.51	N
Q9I5Z0	PA0546	metK	S-adenosylmethionine synthase	0.05			286	1	51.927	N
Q9I636	PA0482	glcB	Malate synthase G	0.1			624	1	70.26	N
Q9I685	PA0432	ahcY	Adenosylhomocysteinase	0.05			320	1	124.84	N
Q9I685	PA0432	ahcY	Adenosylhomocysteinase	0.05			208	1	48.423	N
Q9I685	PA0432	ahcY	Adenosylhomocysteinase	0.05			375	1	101.39	N
Q9I690	PA0423	PA0423	UPF0312 protein PA0423	0.1			66	1	113.47	N
Q9I6B4	PA0381	thiG	Thiazole synthase	0.3			104	1	79.148	N
Q9I6B4	PA0381	thiG	Thiazole synthase	0.3			120	1	46.406	N
Q9I6F1	PA0342	thyA	Thymidylate synthase	0.6			122	1	44.407	N
Q9I6F1	PA0342	thyA	Thymidylate synthase	0.6			233	1	69.383	N
Q9I6J2	PA0299	spuC	Putrescine--pyruvate aminotransferase	0.2			53	1	92.856	N
Q9I6M4	PA0266	davT	5-aminovalerate aminotransferase DavT	0.1			33	1	147.26	N
Q9I6M4	PA0266	davT	5-aminovalerate aminotransferase DavT	0.1			55	1	53.453	N
Q9I6M4	PA0266	davT	5-aminovalerate aminotransferase DavT	0.1			396	1	86.944	N
Q9I6M4	PA0266	davT	5-aminovalerate aminotransferase DavT	0.1			118	1	179.56	N
Q9I6M5	PA0265	davD	Glutarate-semialdehyde dehydrogenase DavD	0.1			223	1	101.29	N
Q9I6M5	PA0265	davD	Glutarate-semialdehyde dehydrogenase DavD	0.1			379	1	101.67	N
Q9I6Z1	PA0141	ppk2	Polyphosphate:ADP/GDP phosphotransferase	0.1			220	1	52.579	N
Q9I747	PA0085	hcp1	Protein hcp1	0.3			68	1	48.527	N
Q9I747	PA0085	hcp1	Protein hcp1	0.3			52	1	160.36	N
Q9I7B7	PA0009	glyQ	Glycine--tRNA ligase alpha subunit	0.3			256	1	61.233	N
Q9I7B7	PA0009	glyQ	Glycine--tRNA ligase alpha subunit	0.3			233	1	86.291	N
Q9I7B8	PA0008	glyS	Glycine--tRNA ligase beta subunit	0.2			615	1	129.43	N
Q9I7B8	PA0008	glyS	Glycine--tRNA ligase beta subunit	0.2			21	1	68.481	N
Q9I7B8	PA0008	glyS	Glycine--tRNA ligase beta subunit	0.2			341	1	74.944	N
Q9I7C2	PA0004	gyrB	DNA gyrase subunit B	0.2			803	1	87.669	N
Q9LCT3	PA4403	secA	Protein translocase subunit SecA	0.1			204	1	144.72	N
Q9LCT3	PA4403	secA	Protein translocase subunit SecA	0.1			593	1	93.258	N
Q9LCT3	PA4403	secA	Protein translocase subunit SecA	0.1			132	1	65.295	N
Q9X2T1	PA5240	trxA	Thioredoxin	0.3			86	1	64.42	N
Q9X2T1	PA5240	trxA	Thioredoxin	0.3			60	1	149.96	N
Q9X2T1	PA5240	trxA	Thioredoxin	0.3			7	1	171.98	N
Q9X6R0	PA1687	speE1	Polyamine aminopropyltransferase 1	0.5			132	1	48.741	N
Q9XCL6	PA3134	gltX	Glutamate--tRNA ligase	0.3			199	1	64.954	N
Q9ZFK4	PA3636	kdsA	2-dehydro-3-deoxyphosphooctonate aldolase	0.3			132	1	99.139	N
Q9ZN70	PA5241	ppx	Exopolyphosphatase	0.4			35	1	41.448	N
E1JGJ8	PA3701	prfB	Peptide chain release factor 2	0.6			37	1	138.93	N
G3XCT6	PA1458	PA1458	Probable two-component sensor	0.3			483	1	73.156	N
G3XCV0	PA1097	fleQ	Transcriptional regulator FleQ	0.4			329	1	55.173	N
G3XCZ6	PA2968	fabD	Malonyl CoA-acyl carrier protein transacylase	0.3			294	1	71.073	N
G3XD11	PA1178	oprH	PhoP/Q and low Mg2+ inducible outer membrane protein H1	0.05			52	1	146.79	N
G3XD11	PA1178	oprH	PhoP/Q and low Mg2+ inducible outer membrane protein H1	0.05			59	1	77.662	N
G3XD11	PA1178	oprH	PhoP/Q and low Mg2+ inducible outer membrane protein H1	0.05			168	1	105.19	N
G3XD11	PA1178	oprH	PhoP/Q and low Mg2+ inducible outer membrane protein H1	0.05			179	1	92.468	N
G3XD11	PA1178	oprH	PhoP/Q and low Mg2+ inducible outer membrane protein H1	0.05			82	1	235.49	N
G3XD11	PA1178	oprH	PhoP/Q and low Mg2+ inducible outer membrane protein H1	0.05			90	1	189.86	N
G3XD15	PA4552	pilW	Type 4 fimbrial biogenesis protein PilW	0.7			254	1	51.854	N
G3XD20	PA0766	mucD	Periplasmic serine endoprotease DegP-like	0.2			345	1	53.166	N
G3XD20	PA0766	mucD	Periplasmic serine endoprotease DegP-like	0.2			164	1	76.847	N
G3XD47	PA0888	aotJ	Arginine/ornithine binding protein AotJ	0.2			184	1	69.979	N
G3XD54	PA1816	dnaQ	DNA polymerase III subunit epsilon	0.8			213	1	80.871	N
G3XD74	PA3999	dacC	D-ala-D-ala-carboxypeptidase	0.1			386	1	91.584	N
G3XD74	PA3999	dacC	D-ala-D-ala-carboxypeptidase	0.1			169	1	124.81	N
G3XD74	PA3999	dacC	D-ala-D-ala-carboxypeptidase	0.1			362	1	104.17	N
G3XDA2	PA2965	fabF1	3-oxoacyl-[acyl-carrier-protein] synthase 2	0.2			97	1	119.39	N
G3XDB0	PA5332	crc	Catabolite repression control protein	0.3			184	1	68.845	N
Q9HT66	PA5507	PA5507	Uncharacterized protein	0.3			72	1	81.003	N
Q9HT76	PA5497	nrdJa	Vitamin B12-dependent ribonucleotide reductase	0.3			268	1	66.335	N
Q9HT76	PA5497	nrdJa	Vitamin B12-dependent ribonucleotide reductase	0.3			392	1	92.264	N
Q9HTC5	PA5441	PA5441	Uncharacterized protein	0.4			222	1	55.011	N
Q9HTC5	PA5441	PA5441	Uncharacterized protein	0.4			623	1	70.942	N
Q9HTD1	PA5435	PA5435	Probable transcarboxylase subunit	0.2			126	1	64.04	N
Q9HTD1	PA5435	PA5435	Probable transcarboxylase subunit	0.2			597	1	60.563	N
Q9HTL9	PA5339	PA5339	Uncharacterized protein	0.3			76	1	76.262	N
Q9HTM3	PA5335	PA5335	Uncharacterized protein	0.6			157	1	81.157	N
Q9HTP2	PA5312	PA5312	Probable aldehyde dehydrogenase	0.1			423	1	71.148	N
Q9HTP2	PA5312	PA5312	Probable aldehyde dehydrogenase	0.1			437	1	86.189	N
Q9HTP2	PA5312	PA5312	Probable aldehyde dehydrogenase	0.1			186	1	77.39	N
Q9HTP2	PA5312	PA5312	Probable aldehyde dehydrogenase	0.1			68	1	68.626	N
Q9HTP2	PA5312	PA5312	Probable aldehyde dehydrogenase	0.1			274	1	148.62	N
Q9HTR6	PA5288	glnK	Nitrogen regulatory protein P-II 2	0.5			82	1	46.921	N
Q9HTY8	PA5201	PA5201	Uncharacterized protein	0.3			190	1	52.576	N
Q9HU54	PA5130	PA5130	Uncharacterized protein	0.5			134	1	44.349	N
Q9HU67	PA5117	typA	Regulatory protein TypA	0.2			482	1	64.803	N
Q9HU67	PA5117	typA	Regulatory protein TypA	0.2			128	1	60.434	N
Q9HU67	PA5117	typA	Regulatory protein TypA	0.2			531	1	129.89	N
Q9HU67	PA5117	typA	Regulatory protein TypA	0.2			536	1	85.716	N
Q9HU67	PA5117	typA	Regulatory protein TypA	0.2			342	1	125.54	N
Q9HU67	PA5117	typA	Regulatory protein TypA	0.2			428	1	58.326	N
Q9HU67	PA5117	typA	Regulatory protein TypA	0.2			234	1	105.28	N
Q9HUC3	PA5060	phaF	Polyhydroxyalkanoate synthesis protein PhaF	0.05			102	1	68.383	N
Q9HUD3	PA5046	PA5046	Malic enzyme	0.05			337	1	131.04	N
Q9HUD3	PA5046	PA5046	Malic enzyme	0.05			133	1	75.646	N
Q9HUD3	PA5046	PA5046	Malic enzyme	0.05			277	1	100.93	N
Q9HUD3	PA5046	PA5046	Malic enzyme	0.05			300	1	74.533	N
Q9HUD3	PA5046	PA5046	Malic enzyme	0.05			421	1	107.32	N
Q9HUD3	PA5046	PA5046	Malic enzyme	0.05			264	1	159.66	N
Q9HUD3	PA5046	PA5046	Malic enzyme	0.05			214	1	70.056	N
Q9HUD4	PA5037	PA5037	Uncharacterized protein	0.3			246	1	63.624	N
Q9HUE4	PA5025	metY	Homocysteine synthase	0.3			322	1	46.704	N
Q9HUG7	PA4998	PA4998	Uncharacterized protein	0.7			15	1	40.857	N
Q9HUM2	PA4942	hflK	Protein HflK	0.1			360	1	119.87	N
Q9HUQ6	PA4907	PA4907	Probable short-chain dehydrogenase	0.3			71	1	82.121	N
Q9HUQ6	PA4907	PA4907	Probable short-chain dehydrogenase	0.3			179	1	69.979	N
Q9HV48	PA4751	ftsH	ATP-dependent zinc metalloprotease FtsH	0.2			628	1	68.515	N
Q9HV54	PA4745	nusA	Transcription termination/antitermination protein NusA	0.1			151	1	153.72	N
Q9HV72	PA4727	pcnB	Poly(A) polymerase I	0.3			135	1	71.379	N
Q9HVC2	PA4673	ychF	Ribosome-binding ATPase YchF	0.3			93	1	84.609	N
Q9HVC2	PA4673	ychF	Ribosome-binding ATPase YchF	0.3			52	1	90.731	N
Q9HVC2	PA4673	ychF	Ribosome-binding ATPase YchF	0.3			184	1	46.447	N
Q9HVE7	PA4645	PA4645	Probable purine/pyrimidine phosphoribosyl transferase	1			36	1	94.407	N
Q9HVJ1	PA4595	PA4595	Probable ATP-binding component of ABC transporter	0.2			419	1	71.425	N
Q9HVJ1	PA4595	PA4595	Probable ATP-binding component of ABC transporter	0.2			473	1	91.276	N
Q9HVJ1	PA4595	PA4595	Probable ATP-binding component of ABC transporter	0.2			309	1	66.708	N
Q9HVJ1	PA4595	PA4595	Probable ATP-binding component of ABC transporter	0.2			328	1	79.974	N
Q9HVJ1	PA4595	PA4595	Probable ATP-binding component of ABC transporter	0.2			341	1	121.68	N
Q9HVL2	PA4572	fklB	Peptidyl-prolyl cis-trans isomerase	0.9			5	1	63.426	N
Q9HVU0	PA4481	mreB	Rod shape-determining protein MreB	0.1			34	1	56.122	N
Q9HVV6	PA4461	PA4461	Probable ATP-binding component of ABC transporter	0.4			196	1	50.207	N
Q9HVV7	PA4460	lptA	Lipopolysaccharide export system protein LptA	0.4			67	1	61.78	N
Q9HVX7	PA4438	zapE	Cell division protein ZapE	0.5			194	1	115.68	N
Q9HVY4	PA4431	PA4431	Ubiquinol-cytochrome c reductase iron-sulfur subunit	0.05			7	1	115.49	N
Q9HVY9	PA4426	PA4426	Uncharacterized protein	0.4			192	1	51.809	N
Q9HW32	PA4370	icmP	Insulin-cleaving metalloproteinase outer membrane protein	0.05			368	1	137.09	N
Q9HW32	PA4370	icmP	Insulin-cleaving metalloproteinase outer membrane protein	0.05			270	1	73.665	N
Q9HW32	PA4370	icmP	Insulin-cleaving metalloproteinase outer membrane protein	0.05			61	1	142.88	N
Q9HW45	PA4356	xenB	Xenobiotic reductase	0.2			17	1	75.463	N
Q9HW49	PA4352	PA4352	Uncharacterized protein	0.1			206	1	57.463	N
Q9HW68	PA4333	PA4333	Fumarate hydratase class I	0.2			164	1	58.079	N
Q9HW68	PA4333	PA4333	Fumarate hydratase class I	0.2			96	1	91.616	N
Q9HW72	PA4329	pykA	Pyruvate kinase	0.1			304	1	55.366	N
Q9HW72	PA4329	pykA	Pyruvate kinase	0.1			36	1	120.84	N
Q9HW73	PA4328	PA4328	Uncharacterized protein	0.6			260	1	62.377	N
Q9HW79	PA4322	PA4322	Uncharacterized protein	0.3			218	1	65.805	N
Q9HW87	PA4314	purU1	Formyltetrahydrofolate deformylase	0.4			277	1	60.961	N
Q9HWG6	PA4223	PA4223	Probable ATP-binding component of ABC transporter	0.2			200	1	51.888	N
Q9HWW1	PA4067	oprG	Outer membrane protein OprG	0.05			211	1	76.332	N
Q9HX22	PA4005	rsfS	Ribosomal silencing factor RsfS	0.5			54	1	77.533	N
Q9HX36	PA3983	PA3983	Uncharacterized protein	#N/A			41	1	79.146	N
Q9HX38	PA3981	PA3981	Uncharacterized protein	0.4			214	1	42.789	N
Q9HXI0	PA3822	PA3822	Uncharacterized protein	0.05			90	1	73.498	N
Q9HXI9	PA3813	iscU	Iron-sulfur cluster assembly scaffold protein IscU	0.6			13	1	103.26	N
Q9HXM5	PA3770	guaB	Inosine-5'-monophosphate dehydrogenase	0.05			485	1	58.661	N
Q9HXM5	PA3770	guaB	Inosine-5'-monophosphate dehydrogenase	0.05			41	1	72.09	N
Q9HXM5	PA3770	guaB	Inosine-5'-monophosphate dehydrogenase	0.05			177	1	57.859	N
Q9HXM5	PA3770	guaB	Inosine-5'-monophosphate dehydrogenase	0.05			188	1	96.015	N
Q9HXM5	PA3770	guaB	Inosine-5'-monophosphate dehydrogenase	0.05			143	1	41.912	N
Q9HXP8	PA3746	ffh	Signal recognition particle protein	0.4			237	1	58.98	N
Q9HXP8	PA3746	ffh	Signal recognition particle protein	0.4			26	1	49.482	N
Q9HXP8	PA3746	ffh	Signal recognition particle protein	0.4			4	1	57.59	N
Q9HXR3	PA3729	PA3729	Uncharacterized protein	0.2			621	1	72.21	N
Q9HXR3	PA3729	PA3729	Uncharacterized protein	0.2			558	1	78.116	N
Q9HXS5	PA3716	PA3716	Uncharacterized protein	0.2			452	1	69.763	N
Q9HXU8	PA3692	lptF	Lipotoxon F, LptF	0.1			248	1	55.866	N
Q9HXU8	PA3692	lptF	Lipotoxon F, LptF	0.1			34	1	118.08	N
Q9HXY1	PA3657	map	Methionine aminopeptidase	0.6			251	1	60.478	N
Q9HXY4	PA3648	opr86	Outer membrane protein assembly factor BamA	0.2			356	1	77.597	N
Q9HXY4	PA3648	opr86	Outer membrane protein assembly factor BamA	0.2			202	1	40.994	N
Q9HY13	PA3613	PA3613	Uncharacterized protein	0.2			455	1	79.659	N
Q9HY81	PA3529	PA3529	Probable peroxidase	0.05			150	1	73.665	N
Q9HY81	PA3529	PA3529	Probable peroxidase	0.05			196	1	45.137	N
Q9HY85	PA3524	gloA1	Lactoylglutathione lyase	0.5			12	1	41.502	N
Q9HYC2	PA3487	pldA	Phospholipase D	#N/A			175	1	77.748	N
Q9HYK7	PA3397	fpr	Ferredoxin--NADP+ reductase	0.2			3	1	58.782	N
Q9HYT5	PA3309	PA3309	Uncharacterized protein	0.05			81	1	118.21	N
Q9HYT5	PA3309	PA3309	Uncharacterized protein	0.05			54	1	51.771	N
Q9HYX8	PA3262	PA3262	Peptidyl-prolyl cis-trans isomerase	0.1			102	1	97.431	N
Q9HYY3	PA3257	prc	Periplasmic tail-specific protease	0.4			392	1	53.679	N
Q9HZ80	PA3147	wbpJ	Probable glycosyl transferase WbpJ	0.4			59	1	48.848	N
Q9HZ98	PA3126	ibpA	Heat-shock protein IbpA	0.3			3	1	42.843	N
Q9HZG2	PA3046	PA3046	Uncharacterized protein	0.4			39	1	58.098	N
Q9HZI7	PA3019	PA3019	Probable ATP-binding component of ABC transporter	0.6			500	1	81.157	N
Q9HZI7	PA3019	PA3019	Probable ATP-binding component of ABC transporter	0.6			401	1	112.16	N
Q9HZJ1	PA3015	PA3015	Uncharacterized protein	#N/A			205	1	67.035	N
Q9HZK4	PA3001	PA3001	Glyceraldehyde-3-phosphate dehydrogenase	0.1			216	1	83.358	N
Q9HZK4	PA3001	PA3001	Glyceraldehyde-3-phosphate dehydrogenase	0.1			324	1	70.837	N
Q9HZK4	PA3001	PA3001	Glyceraldehyde-3-phosphate dehydrogenase	0.1			455	1	51.643	N
Q9HZM8	PA2976	rne	Ribonuclease E	0.05			634	1	64.04	N
Q9HZM8	PA2976	rne	Ribonuclease E	0.05			953	1	58.246	N
Q9HZM8	PA2976	rne	Ribonuclease E	0.05			608	1	66.435	N
Q9HZM8	PA2976	rne	Ribonuclease E	0.05			109	1	50.178	N
Q9HZM8	PA2976	rne	Ribonuclease E	0.05			450	1	80.96	N
Q9I015	PA2828	PA2828	Probable aminotransferase	0.3			272	1	82.529	N
Q9I083	PA2760	PA2760	Probable outer membrane protein	0.05			267	1	67.364	N
Q9I083	PA2760	PA2760	Probable outer membrane protein	0.05			197	1	69.598	N
Q9I083	PA2760	PA2760	Probable outer membrane protein	0.05			402	1	54.549	N
Q9I0L4	PA2624	idh	Isocitrate dehydrogenase	0.1			340	1	43.497	N
Q9I0L4	PA2624	idh	Isocitrate dehydrogenase	0.1			544	1	81.904	N
Q9I0L4	PA2624	idh	Isocitrate dehydrogenase	0.1			52	1	91.969	N
Q9I0L4	PA2624	idh	Isocitrate dehydrogenase	0.1			136	1	90.827	N
Q9I0L4	PA2624	idh	Isocitrate dehydrogenase	0.1			656	1	75.38	N
Q9I0L4	PA2624	idh	Isocitrate dehydrogenase	0.1			80	1	108.59	N
Q9I0L4	PA2624	idh	Isocitrate dehydrogenase	0.1			719	1	111.39	N
Q9I0L5	PA2623	icd	Isocitrate dehydrogenase [NADP]	0.05			157	1	122.78	N
Q9I0L5	PA2623	icd	Isocitrate dehydrogenase [NADP]	0.05			195	1	85.087	N
Q9I0L5	PA2623	icd	Isocitrate dehydrogenase [NADP]	0.05			383	1	49.715	N
Q9I0L5	PA2623	icd	Isocitrate dehydrogenase [NADP]	0.05			28	1	126.61	N
Q9I0L5	PA2623	icd	Isocitrate dehydrogenase [NADP]	0.05			117	1	82.716	N
Q9I0L5	PA2623	icd	Isocitrate dehydrogenase [NADP]	0.05			354	1	94.487	N
Q9I0M2	PA2616	trxB1	Thioredoxin reductase	0.1			167	1	125.58	N
Q9I0Q4	PA2582	PA2582	RNA chaperone ProQ	0.7			177	1	71.882	N
Q9I1K8	PA2265	PA2265	Gluconate dehydrogenase	0.8			494	1	41.979	N
Q9I2R2	PA1833	PA1833	Probable oxidoreductase	0.2			296	1	57.96	N
Q9I2T8	PA1805	ppiD	Peptidylprolyl isomerase	0.1			41	1	91.701	N
Q9I2T8	PA1805	ppiD	Peptidylprolyl isomerase	0.1			435	1	85.666	N
Q9I2T8	PA1805	ppiD	Peptidylprolyl isomerase	0.1			473	1	49.715	N
Q9I2T8	PA1805	ppiD	Peptidylprolyl isomerase	0.1			47	1	152.01	N
Q9I2T9	PA1803	lon	Lon protease	0.2			117	1	76.759	N
Q9I2T9	PA1803	lon	Lon protease	0.2			245	1	59.345	N
Q9I2T9	PA1803	lon	Lon protease	0.2			496	1	50.155	N
Q9I2U9	PA1793	ppiB	Peptidyl-prolyl cis-trans isomerase	0.2			26	1	92.939	N
Q9I2U9	PA1793	ppiB	Peptidyl-prolyl cis-trans isomerase	0.2			7	1	86.772	N
Q9I2U9	PA1793	ppiB	Peptidyl-prolyl cis-trans isomerase	0.2			38	1	60.49	N
Q9I2V1	PA1791	PA1791	Uncharacterized protein	0.4			389	1	60.892	N
Q9I2W9	PA1770	ppsA	Phosphoenolpyruvate synthase	0.05			150	1	77.674	N
Q9I2W9	PA1770	ppsA	Phosphoenolpyruvate synthase	0.05			733	1	146.81	N
Q9I2W9	PA1770	ppsA	Phosphoenolpyruvate synthase	0.05			514	1	70.268	N
Q9I2W9	PA1770	ppsA	Phosphoenolpyruvate synthase	0.05			599	1	94.122	N
Q9I2Y7	PA1750	PA1750	Phospho-2-dehydro-3-deoxyheptonate aldolase	0.2			110	1	62.162	N
Q9I3B2	PA1609	fabB	Beta-ketoacyl-ACP synthase I	0.05			36	1	90.15	N
Q9I3B2	PA1609	fabB	Beta-ketoacyl-ACP synthase I	0.05			154	1	97.057	N
Q9I3B2	PA1609	fabB	Beta-ketoacyl-ACP synthase I	0.05			55	1	101.67	N
Q9I3D3	PA1585	sucA	2-oxoglutarate dehydrogenase (E1 subunit)	0.1			499	1	146.78	N
Q9I3D3	PA1585	sucA	2-oxoglutarate dehydrogenase (E1 subunit)	0.1			467	1	124.08	N
Q9I3D3	PA1585	sucA	2-oxoglutarate dehydrogenase (E1 subunit)	0.1			909	1	85.676	N
Q9I3D3	PA1585	sucA	2-oxoglutarate dehydrogenase (E1 subunit)	0.1			53	1	76.378	N
Q9I3D4	PA1584	sdhB	Succinate dehydrogenase (B subunit)	0.05			218	1	65.897	N
Q9I3D5	PA1583	sdhA	Succinate dehydrogenase flavoprotein subunit	0.05			554	1	55.734	N
Q9I3D5	PA1583	sdhA	Succinate dehydrogenase flavoprotein subunit	0.05			269	1	70.272	N
Q9I3D5	PA1583	sdhA	Succinate dehydrogenase flavoprotein subunit	0.05			217	1	114.55	N
Q9I3D5	PA1583	sdhA	Succinate dehydrogenase flavoprotein subunit	0.05			405	1	107.09	N
Q9I3D5	PA1583	sdhA	Succinate dehydrogenase flavoprotein subunit	0.05			450	1	108.09	N
Q9I3D5	PA1583	sdhA	Succinate dehydrogenase flavoprotein subunit	0.05			574	1	60.648	N
Q9I3G1	PA1556	ccoO2	Cytochrome c oxidase, cbb3-type, CcoO subunit	0.05			126	1	60.358	N
Q9I3G4	PA1553	ccoO1	Cytochrome c oxidase, cbb3-type, CcoO subunit	0.1			127	1	75.311	N
Q9I3G5	PA1552	ccoP1	Cbb3-type cytochrome c oxidase subunit	0.3			209	1	102.52	N
Q9I4I1	PA1156	nrdA	Ribonucleoside-diphosphate reductase	0.1			202	1	104.18	N
Q9I4I1	PA1156	nrdA	Ribonucleoside-diphosphate reductase	0.1			404	1	85.522	N
Q9I4I1	PA1156	nrdA	Ribonucleoside-diphosphate reductase	0.1			825	1	65.295	N
Q9I4I1	PA1156	nrdA	Ribonucleoside-diphosphate reductase	0.1			470	1	43.769	N
Q9I4I1	PA1156	nrdA	Ribonucleoside-diphosphate reductase	0.1			166	1	137.64	N
Q9I4I1	PA1156	nrdA	Ribonucleoside-diphosphate reductase	0.1			191	1	45.368	N
Q9I4I1	PA1156	nrdA	Ribonucleoside-diphosphate reductase	0.1			797	1	131.61	N
Q9I4I1	PA1156	nrdA	Ribonucleoside-diphosphate reductase	0.1			920	1	77.923	N
Q9I4I1	PA1156	nrdA	Ribonucleoside-diphosphate reductase	0.1			218	1	110.38	N
Q9I4I1	PA1156	nrdA	Ribonucleoside-diphosphate reductase	0.1			434	1	208.56	N
Q9I4I2	PA1155	nrdB	Ribonucleoside-diphosphate reductase subunit beta	0.4			173	1	67.169	N
Q9I4R0	PA1064	PA1064	Uncharacterized protein	0.3			120	1	90.444	N
Q9I4W2	PA1011	PA1011	Uncharacterized protein	0.2			281	1	82.529	N
Q9I4W2	PA1011	PA1011	Uncharacterized protein	0.2			290	1	70.26	N
Q9I4W2	PA1011	PA1011	Uncharacterized protein	0.2			299	1	120.86	N
Q9I5A3	PA0837	slyD	Peptidyl-prolyl cis-trans isomerase	0.6			6	1	81.635	N
Q9I5F6	PA0782	putA	Bifunctional protein PutA	0.2			279	1	50.102	N
Q9I5F6	PA0782	putA	Bifunctional protein PutA	0.2			147	1	75.109	N
Q9I5F9	PA0779	lon	Lon protease	0.2			766	1	44.847	N
Q9I5F9	PA0779	lon	Lon protease	0.2			647	1	62.338	N
Q9I5Y8	PA0548	tktA	Transketolase	0.1			349	1	68.952	N
Q9I5Y8	PA0548	tktA	Transketolase	0.1			403	1	50.305	N
Q9I5Y8	PA0548	tktA	Transketolase	0.1			215	1	55.437	N
Q9I662	PA0456	PA0456	Probable cold-shock protein	0.1			12	1	111.69	N
Q9I687	PA0430	metF	Methylenetetrahydrofolate reductase	0.3			164	1	55.401	N
Q9I687	PA0430	metF	Methylenetetrahydrofolate reductase	0.3			127	1	73.499	N
Q9I689	PA0428	rhlE	ATP-dependent RNA helicase RhlE	0.2			203	1	81.296	N
Q9I689	PA0428	rhlE	ATP-dependent RNA helicase RhlE	0.2			218	1	41.401	N
Q9I689	PA0428	rhlE	ATP-dependent RNA helicase RhlE	0.2			208	1	68.915	N
Q9I6C0	PA0374	ftsE	Cell division protein FtsE	0.3			184	1	58.071	N
Q9I6H4	PA0317	PA0317	Uncharacterized protein	0.3			180	1	80.96	N
Q9I6H4	PA0317	PA0317	Uncharacterized protein	0.3			101	1	67.334	N
Q9I6H4	PA0317	PA0317	Uncharacterized protein	0.3			414	1	71.354	N
Q9I6H5	PA0316	serA	D-3-phosphoglycerate dehydrogenase	0.1			34	1	76.332	N
Q9I6H5	PA0316	serA	D-3-phosphoglycerate dehydrogenase	0.1			145	1	62.823	N
Q9I6H5	PA0316	serA	D-3-phosphoglycerate dehydrogenase	0.1			273	1	106.62	N
Q9I6Z3	PA0139	ahpC	Alkyl hydroperoxide reductase subunit C	0.05			126	1	96.342	N
Q9I6Z3	PA0139	ahpC	Alkyl hydroperoxide reductase subunit C	0.05			139	1	105.03	N
Q9I749	PA0083	PA0083	Uncharacterized protein	0.7			69	1	64.121	N
Q9I749	PA0083	PA0083	Uncharacterized protein	0.7			120	1	71.692	N
Q9I762	PA0070	PA0070	Uncharacterized protein	0.1			203	1	194.12	N
Q9I762	PA0070	PA0070	Uncharacterized protein	0.1			289	1	142.3	N
Q9I762	PA0070	PA0070	Uncharacterized protein	0.1			171	1	111.06	N
Q9I762	PA0070	PA0070	Uncharacterized protein	0.1			62	1	58.604	N
Q9I762	PA0070	PA0070	Uncharacterized protein	0.1			141	1	138.37	N
Q9I762	PA0070	PA0070	Uncharacterized protein	0.1			249	1	68.847	N
Q9I762	PA0070	PA0070	Uncharacterized protein	0.1			233	1	100.45	N
G3XD94	PA3159	wbpA	UDP-N-acetyl-D-glucosamine 6-dehydrogenase	0.1			233	0.999999	80.896	N
O52759	PA4239	rpsD	30S ribosomal protein S4	0.05			89	0.999999	86.548	N
O82851	PA3655	tsf	Elongation factor Ts	0.05			133	0.999999	129.55	N
P26480	PA0576	rpoD	RNA polymerase sigma factor RpoD	0.1			151	0.999999	69.922	N
P47204	PA4407	ftsZ	Cell division protein FtsZ	0.2			329	0.999999	148.44	N
Q59637	PA5015	aceE	Pyruvate dehydrogenase E1 component	0.05			402	0.999999	81.381	N
Q9HV43	PA4761	dnaK	Chaperone protein DnaK	0.05			44	0.999999	172.3	N
Q9HV59	PA4740	pnp	Polyribonucleotide nucleotidyltransferase	0.05			244	0.999999	86.803	N
Q9HVM4	PA4560	ileS	Isoleucine--tRNA ligase	0.2			802	0.999999	92.034	N
Q9HWC9	PA4269	rpoC	DNA-directed RNA polymerase subunit beta'	0.05			720	0.999999	109.85	N
Q9HWC9	PA4269	rpoC	DNA-directed RNA polymerase subunit beta'	0.05			768	0.999999	105	N
Q9HWE1	PA4257	rpsC	30S ribosomal protein S3	0.05			102	0.999999	70.272	N
Q9HWE2	PA4256	rplP	50S ribosomal protein L16	0.05			17	0.999999	93.374	N
Q9HWE8	PA4250	rpsN	30S ribosomal protein S14	0.05			43	0.999999	148.04	N
Q9HWF0	PA4248	rplF	50S ribosomal protein L6	0.05			56	0.999999	75.243	N
Q9HYD5	PA3471	maeA	NAD-dependent malic enzyme	0.2			544	0.999999	96.391	N
Q9HYR9	PA3326	clpP2	ATP-dependent Clp protease proteolytic subunit 2	0.2			176	0.999999	84.874	N
Q9HZE0	PA3068	gdhB	NAD-specific glutamate dehydrogenase	0.1			506	0.999999	68.41	N
Q9HZK6	PA2999	nqrA	Na(+)-translocating NADH-quinone reductase subunit A	0.2			121	0.999999	86.944	N
Q9HZP7	PA2951	etfA	Electron transfer flavoprotein subunit alpha	0.05			131	0.999999	92.474	N
Q9I3C5	PA1596	htpG	Chaperone protein HtpG	0.05			77	0.999999	88.09	N
Q9I4W0	PA1013	purC	Phosphoribosylaminoimidazole-succinocarboxamide synthase	0.3			159	0.999999	77.058	N
Q9HTT8	PA5257	PA5257	Uncharacterized protein	0.2			130	0.999999	62.94	N
Q9HU22	PA5163	rmlA	Glucose-1-phosphate thymidylyltransferase	0.3			244	0.999999	103.03	N
Q9HUG0	PA5005	PA5005	Probable carbamoyl transferase	0.2			448	0.999999	99.511	N
Q9HWW7	PA4061	PA4061	Probable thioredoxin	0.5			64	0.999999	72.705	N
Q9I083	PA2760	PA2760	Probable outer membrane protein	0.05			408	0.999999	100.58	N
Q9I0T9	PA2545	xthA	Exodeoxyribonuclease III	0.5			204	0.999999	65.224	N
Q9I4I1	PA1156	nrdA	Ribonucleoside-diphosphate reductase	0.1			134	0.999999	68.261	N
Q9I4I2	PA1155	nrdB	Ribonucleoside-diphosphate reductase subunit beta	0.4			62	0.999999	110.67	N
Q9I6X0	PA0162	opdC	Histidine porin OpdC	0.6			47	0.999999	68.016	N
P09591	PA4265; PA4277	tufA	Elongation factor Tu	0.05			91	0.999998	234.27	N
P30718	PA4385	groL	60 kDa chaperonin	0.05			457	0.999998	188.48	N
P33641	PA4545	bamD	Outer membrane protein assembly factor BamD	0.4			78	0.999998	74.296	N
Q59637	PA5015	aceE	Pyruvate dehydrogenase E1 component	0.05			283	0.999998	129.55	N
Q59643	PA5243	hemB	Delta-aminolevulinic acid dehydratase	0.1			103	0.999998	121.18	N
Q9HV43	PA4761	dnaK	Chaperone protein DnaK	0.05			282	0.999998	162.61	N
Q9HVC4	PA4671	rplY	50S ribosomal protein L25	0.05			186	0.999998	151.42	N
O30508	PA0895	aruC	Succinylornithine transaminase/acetylornithine aminotransferase	0.1			112	0.999997	101.39	N
Q9HUN2	PA4932	rplI	50S ribosomal protein L9	0.1			11	0.999997	100.69	N
Q9HV55	PA4744	infB	Translation initiation factor IF-2	0.05			698	0.999997	106.63	N
Q9HVX6	PA4439	trpS	Tryptophan--tRNA ligase	0.3			286	0.999997	87.498	N
Q9HWD2	PA4266	fusA	Elongation factor G 1	0.05			541	0.999997	94.45	N
Q9I3D5	PA1583	sdhA	Succinate dehydrogenase flavoprotein subunit	0.05			221	0.999997	90.22	N
Q9I3G2	PA1555	ccoP2	Cbb3-type cytochrome c oxidase subunit	0.2			104	0.999997	85.212	N
P33641	PA4545	bamD	Outer membrane protein assembly factor BamD	0.4			240	0.999996	91.317	N
Q59637	PA5015	aceE	Pyruvate dehydrogenase E1 component	0.05			285	0.999996	133.12	N
Q9HWF7	PA4241	rpsM	30S ribosomal protein S13	0.1			12	0.999996	74.486	N
Q9HX33	PA3987	leuS	Leucine--tRNA ligase	0.2			873	0.999996	64.776	N
Q9HZP5	PA2953	PA2953	Electron transfer flavoprotein-ubiquinone oxidoreductase	0.1			203	0.999996	78.902	N
Q9I2V5	PA1787	acnB	Aconitate hydratase B	0.05			51	0.999996	53.779	N
Q9HTU9	PA5245	PA5245	Glyoxalase	0.5			207	0.999996	64.203	N
Q9I4W2	PA1011	PA1011	Uncharacterized protein	0.2			259	0.999996	57.525	N
Q9I521	PA0937	PA0937	Uncharacterized protein	0.4			64	0.999996	60.961	N
Q9HT16	PA5558	atpF	ATP synthase subunit b	0.1			84	0.999995	123.86	N
Q9HT20	PA5554	atpD	ATP synthase subunit beta	0.05			122	0.999995	150.76	N
Q9HVN5	PA4542	clpB	Chaperone protein ClpB	0.1			153	0.999995	133.05	N
Q9HVY6	PA4429	PA4429	Probable cytochrome c1	0.1			214	0.999995	58.885	N
O82850	PA3656	rpsB	30S ribosomal protein S2	0.05			5	0.999994	78.994	N
P72151	PA1092	fliC	B-type flagellin	0.05			432	0.999994	145.79	N
Q9I0A4	PA2739	pheT	Phenylalanine--tRNA ligase beta subunit	0.2			767	0.999994	130.89	N
Q9I3F6	PA1561	aer	Aerotaxis receptor Aer	0.3			371	0.999994	89.507	N
Q9I3G6	PA1551	PA1551	Probable ferredoxin	0.4			391	0.999994	146.78	N
Q9I6Z3	PA0139	ahpC	Alkyl hydroperoxide reductase subunit C	0.05			14	0.999994	65.313	N
Q9I787	PA0045	PA0045	Uncharacterized protein	0.4			99	0.999994	113.47	N
O82851	PA3655	tsf	Elongation factor Ts	0.05			218	0.999993	101.04	N
Q9I3C5	PA1596	htpG	Chaperone protein HtpG	0.05			372	0.999993	87.568	N
Q9HUN2	PA4932	rplI	50S ribosomal protein L9	0.1			14	0.999992	111.12	N
Q9HXR3	PA3729	PA3729	Uncharacterized protein	0.2			129	0.999992	66.568	N
Q9I5F6	PA0782	putA	Bifunctional protein PutA	0.2			996	0.999992	79.597	N
P57668	PA2532	tpx	Thiol peroxidase	0.3			9	0.999991	69.716	N
P72173	PA3139	aspC	Aspartate aminotransferase	0.1			32	0.999991	53.981	N
Q9HUA5	PA5078	opgG	Glucans biosynthesis protein G	0.1			473	0.999991	109.68	N
Q9I1H5	PA2300	chiC	Chitinase	0.2			288	0.999991	60.79	N
Q9I2Y9	PA1748	PA1748	Probable enoyl-CoA hydratase/isomerase	0.5			24	0.999991	84.327	N
O30508	PA0895	aruC	Succinylornithine transaminase/acetylornithine aminotransferase	0.1			124	0.99999	52.693	N
Q9HTN8	PA5316	rpmB	50S ribosomal protein L28	0.05			23	0.99999	113.35	N
Q9HZP7	PA2951	etfA	Electron transfer flavoprotein subunit alpha	0.05			83	0.99999	51.727	N
Q9I574	PA0867	mliC	Membrane-bound lysozyme inhibitor of C-type lysozyme	0.3			84	0.99999	99.871	N
Q9HUQ6	PA4907	PA4907	Probable short-chain dehydrogenase	0.3			165	0.99999	120.09	N
P77915	PA1546	hemN	Oxygen-independent coproporphyrinogen III oxidase	0.2			260	0.999989	52.071	N
Q9HTJ1	PA5373	betB	NAD/NADP-dependent betaine aldehyde dehydrogenase	0.2			409	0.999989	53.779	N
P09591	PA4265; PA4277	tufA	Elongation factor Tu	0.05			52	0.999988	141.1	N
Q9HU56	PA5128	secB	Protein-export protein SecB	0.2			51	0.999988	109.07	N
Q9I685	PA0432	ahcY	Adenosylhomocysteinase	0.05			336	0.999988	49.31	N
Q9I762	PA0070	PA0070	Uncharacterized protein	0.1			90	0.999988	51.539	N
Q9I4W2	PA1011	PA1011	Uncharacterized protein	0.2			241	0.999987	97.059	N
Q9I2U2	PA1800	tig	Trigger factor	0.05			309	0.999986	105.81	N
Q9HY81	PA3529	PA3529	Probable peroxidase	0.05			143	0.999986	114.89	N
Q9HYZ6	PA3244	minD	Site-determining protein	0.1			82	0.999986	51.147	N
Q9I0L5	PA2623	icd	Isocitrate dehydrogenase [NADP]	0.05			222	0.999986	49.934	N
Q51561	PA4270	rpoB	DNA-directed RNA polymerase subunit beta	0.05			232	0.999985	150.98	N
Q51561	PA4270	rpoB	DNA-directed RNA polymerase subunit beta	0.05			1025	0.999985	162.26	N
P38100	PA4756	carB	Carbamoyl-phosphate synthase large chain	0.2			97	0.999984	98	N
Q9HW02	PA4411	murC	UDP-N-acetylmuramate--L-alanine ligase	0.2			153	0.999984	62.357	N
Q9HWF8	PA4240	rpsK	30S ribosomal protein S11	0.1			81	0.999984	76.478	N
Q9HXZ2	PA3639	accA	Acetyl-coenzyme A carboxylase carboxyl transferase subunit alpha	0.2			50	0.999984	130.09	N
P33641	PA4545	bamD	Outer membrane protein assembly factor BamD	0.4			144	0.999983	68.355	N
G3XD61	PA3148	wbpI	UDP-2,3-diacetamido-2,3-dideoxy-D-glucuronate 2-epimerase	0.2			169	0.999982	118.31	N
O82850	PA3656	rpsB	30S ribosomal protein S2	0.05			36	0.999982	59.418	N
P47205	PA4406	lpxC	UDP-3-O-acyl-N-acetylglucosamine deacetylase	0.1			220	0.999982	72.568	N
Q9X2T1	PA5240	trxA	Thioredoxin	0.3			107	0.999982	47.556	N
Q9HV43	PA4761	dnaK	Chaperone protein DnaK	0.05			80	0.999981	93.162	N
Q9I762	PA0070	PA0070	Uncharacterized protein	0.1			206	0.999981	160.38	N
Q9HUV9	PA4854	purH	Bifunctional purine biosynthesis protein PurH	0.2			193	0.999979	85.224	N
Q9HVC4	PA4671	rplY	50S ribosomal protein L25	0.05			25	0.999979	71.052	N
Q9I3D3	PA1585	sucA	2-oxoglutarate dehydrogenase (E1 subunit)	0.1			271	0.999979	71.806	N
Q9I6A0	PA0400	PA0400	Probable cystathionine gamma-lyase	0.2			226	0.999979	66.137	N
Q9I6X6	PA0156	PA0156	Probable Resistance-Nodulation-Cell Division (RND) efflux membrane fusion protein	0.6			218	0.999978	51.166	N
G3XD76	PA3666	dapD	2,3,4,5-tetrahydropyridine-2,6-dicarboxylate N-succinyltransferase	0.2			344	0.999977	104.24	N
P09591	PA4265; PA4277	tufA	Elongation factor Tu	0.05			359	0.999977	80.102	N
Q9HWF7	PA4241	rpsM	30S ribosomal protein S13	0.1			76	0.999977	98.299	N
Q9I4Z4	PA0973	pal	Peptidoglycan-associated lipoprotein	0.1			41	0.999975	155.74	N
Q9HW32	PA4370	icmP	Insulin-cleaving metalloproteinase outer membrane protein	0.05			441	0.999975	62.055	N
Q9HT20	PA5554	atpD	ATP synthase subunit beta	0.05			214	0.999973	82.069	N
Q9I4B0	PA1228	PA1228	Uncharacterized protein	0.3			20	0.999972	93.495	N
G3XCW5	PA3031	PA3031	Uncharacterized protein	0.3			63;63	0.999971	60.76	N
Q9I4W3	PA1010	dapA	4-hydroxy-tetrahydrodipicolinate synthase	0.3			202	0.999971	61.353	N
Q9I502	PA0956	proS	Proline--tRNA ligase	0.2			120	0.999969	73.248	N
Q9HWC4	PA4275	nusG	Transcription termination/antitermination protein NusG	0.2			148	0.999968	48.656	N
P72151	PA1092	fliC	B-type flagellin	0.05			52	0.999967	120.77	N
Q9HWE0	PA4258	rplV	50S ribosomal protein L22	0.05			57	0.999964	241.46	N
Q9HWC9	PA4269	rpoC	DNA-directed RNA polymerase subunit beta'	0.05			566	0.999963	74.296	N
Q9HV54	PA4745	nusA	Transcription termination/antitermination protein NusA	0.1			339	0.999963	76.78	N
P57668	PA2532	tpx	Thiol peroxidase	0.3			101	0.999962	118.5	N
Q9I6Z3	PA0139	ahpC	Alkyl hydroperoxide reductase subunit C	0.05			5	0.99996	157.66	N
P72173	PA3139	aspC	Aspartate aminotransferase	0.1			23	0.999959	132.64	N
Q9HXZ2	PA3639	accA	Acetyl-coenzyme A carboxylase carboxyl transferase subunit alpha	0.2			32	0.999958	108.14	N
P47205	PA4406	lpxC	UDP-3-O-acyl-N-acetylglucosamine deacetylase	0.1			213	0.999957	78.708	N
Q9I5U3	PA0594	surA	Chaperone SurA	0.3			70	0.999957	147.91	N
Q9I0L4	PA2624	idh	Isocitrate dehydrogenase	0.1			396	0.999957	48.146	N
Q9I3D5	PA1583	sdhA	Succinate dehydrogenase flavoprotein subunit	0.05			498	0.999957	75.571	N
O52759	PA4239	rpsD	30S ribosomal protein S4	0.05			36	0.999955	75.589	N
Q9HVT7	PA4484	gatB	Aspartyl/glutamyl-tRNA(Asn/Gln) amidotransferase subunit B	0.2			218	0.999955	72.355	N
Q9HZP7	PA2951	etfA	Electron transfer flavoprotein subunit alpha	0.05			209	0.999955	82.279	N
Q9I762	PA0070	PA0070	Uncharacterized protein	0.1			274	0.999954	123.29	N
Q9HT80	PA5493	polA	DNA polymerase I	0.2			850	0.999953	71.354	N
P14532	PA4587	ccpA	Cytochrome c551 peroxidase	0.6			314	0.999952	70.907	N
Q9I5Y4	PA0552	pgk	Phosphoglycerate kinase	0.2			23	0.999952	63.165	N
P08280	PA3617	recA	Protein RecA	0.1			109	0.999949	87.489	N
Q9HTV1	PA5239	rho	Transcription termination factor Rho	0.2			135	0.999949	53.946	N
Q9I2U0	PA1802	clpX	ATP-dependent Clp protease ATP-binding subunit ClpX	0.2			415	0.999949	104.33	N
Q9HVU0	PA4481	mreB	Rod shape-determining protein MreB	0.1			99	0.999949	75.669	N
P72151	PA1092	fliC	B-type flagellin	0.05			435	0.999946	115.87	N
Q9I3D2	PA1586	sucB	Dihydrolipoyllysine-residue succinyltransferase component of 2-oxoglutarate dehydrogenase complex	0.05			263	0.999944	119.91	N
Q9I6A0	PA0400	PA0400	Probable cystathionine gamma-lyase	0.2			269	0.999944	48.899	N
Q9HUM0	PA4944	hfq	RNA-binding protein Hfq	0.05			48	0.999943	74.173	N
Q9I4Z4	PA0973	pal	Peptidoglycan-associated lipoprotein	0.1			47	0.999943	175.75	N
P47204	PA4407	ftsZ	Cell division protein FtsZ	0.2			350	0.99994	89.298	N
Q9I0L4	PA2624	idh	Isocitrate dehydrogenase	0.1			391	0.99994	56.013	N
Q9HUV9	PA4854	purH	Bifunctional purine biosynthesis protein PurH	0.2			232	0.999939	98.507	N
Q9I553	PA0903	alaS	Alanine--tRNA ligase	0.2			74	0.999938	51.643	N
P32722	PA0958	oprD	Porin D	0.05			112	0.999937	63.682	N
Q9HWE5	PA4253	rplN	50S ribosomal protein L14	0.05			82	0.999937	52.837	N
Q9HXI9	PA3813	iscU	Iron-sulfur cluster assembly scaffold protein IscU	0.6			48	0.999936	94.692	N
Q9HXZ5	PA3635	eno	Enolase	0.1			70	0.999935	119.17	N
Q9HU65	PA5119	glnA	Glutamine synthetase	0.1			160	0.999933	123.2	N
Q9HZP6	PA2952	etfB	Electron transfer flavoprotein subunit beta	0.05			93	0.999931	139.78	N
Q9HWF7	PA4241	rpsM	30S ribosomal protein S13	0.1			8	0.999926	76.85	N
Q9I4E6	PA1192	ttcA	tRNA-cytidine(32) 2-sulfurtransferase	#N/A			257	0.999924	43.512	N
Q9I3D4	PA1584	sdhB	Succinate dehydrogenase (B subunit)	0.05			211	0.999923	83.869	N
Q9HV55	PA4744	infB	Translation initiation factor IF-2	0.05			460	0.999922	83.877	N
Q9LCT3	PA4403	secA	Protein translocase subunit SecA	0.1			505	0.999922	68.458	N
Q9HWE7	PA4251	rplE	50S ribosomal protein L5	0.05			24	0.999917	74.12	N
G3XD14	PA4723	dksA	RNA polymerase-binding transcription factor DksA	0.5			65	0.999912	60.334	N
Q9HW49	PA4352	PA4352	Uncharacterized protein	0.1			36	0.999911	112.53	N
Q9I2U8	PA1794	glnS	Glutamine--tRNA ligase	0.2			318	0.999909	53.683	N
Q59637	PA5015	aceE	Pyruvate dehydrogenase E1 component	0.05			159	0.999908	85.958	N
Q9HWD2	PA4266	fusA	Elongation factor G 1	0.05			532	0.999908	66.972	N
Q9HWE0	PA4258	rplV	50S ribosomal protein L22	0.05			61	0.999908	194.26	N
Q9HU56	PA5128	secB	Protein-export protein SecB	0.2			139	0.999905	85.062	N
G3XDA5	PA0291	oprE	Anaerobically-induced outer membrane porin OprE	0.05			197	0.999905	46.566	N
O69077	PA0904	lysC	Aspartokinase	0.2			318	0.999904	103.91	N
Q9HVN5	PA4542	clpB	Chaperone protein ClpB	0.1			142	0.999899	69.276	N
Q9HXZ1	PA3640	dnaE	DNA polymerase III subunit alpha	0.4			1016	0.999893	42.209	N
Q9HW91	PA4310	pctB	Methyl-accepting chemotaxis protein PctB	0.3			70	0.999885	92.856	N
P08308	PA5172	arcB	Ornithine carbamoyltransferase, catabolic	0.05			7	0.999883	73.039	N
O69077	PA0904	lysC	Aspartokinase	0.2			314	0.999865	59.116	N
G3XCT6	PA1458	PA1458	Probable two-component sensor	0.3			649	0.999865	90.412	N
Q59637	PA5015	aceE	Pyruvate dehydrogenase E1 component	0.05			756	0.999864	41.711	N
Q9HTL0	PA5348	hupA	DNA-binding protein HU-alpha	0.6			26	0.999862	45.014	N
Q9HYC9	PA3480	dcd	dCTP deaminase	0.4			78	0.999859	54.225	N
O82851	PA3655	tsf	Elongation factor Ts	0.05			214	0.999858	74.296	N
Q9HUD3	PA5046	PA5046	Malic enzyme	0.05			285	0.999847	86.48	N
Q9HVF8	PA4633	PA4633	Probable chemotaxis transducer	0.5			541	0.999846	73.848	N
P30718	PA4385	groL	60 kDa chaperonin	0.05			68	0.999843	179.9	N
Q9HT18	PA5556	atpA	ATP synthase subunit alpha	0.05			208	0.999837	50.909	N
Q9I099	PA2744	thrS	Threonine--tRNA ligase	0.2			315	0.999831	90.453	N
Q9HWF2	PA4246	rpsE	30S ribosomal protein S5	0.05			20	0.99983	90.285	N
Q51561	PA4270	rpoB	DNA-directed RNA polymerase subunit beta	0.05			1125	0.999828	83.966	N
Q9HTF1	PA5413	ltaE	Low specificity L-threonine aldolase	0.2			28	0.999828	42.973	N
Q9I2X2	PA1767	PA1767	Uncharacterized protein	0.2			172	0.999822	95.502	N
Q9HVS6	PA4495	PA4495	Uncharacterized protein	0.2			150	0.999818	94.309	N
Q9HZM8	PA2976	rne	Ribonuclease E	0.05			240	0.999813	99.059	N
Q9I2U8	PA1794	glnS	Glutamine--tRNA ligase	0.2			264	0.999801	117.7	N
Q9HXZ5	PA3635	eno	Enolase	0.1			215	0.999797	162.28	N
Q9I3D3	PA1585	sucA	2-oxoglutarate dehydrogenase (E1 subunit)	0.1			275	0.999773	48.004	N
Q9HWF4	PA4244	rplO	50S ribosomal protein L15	0.05			99	0.999772	142.43	N
Q9HZ67	PA3166	pheA	P-protein	0.4			68	0.999769	67.035	N
Q9I0Z1	PA2491	PA2491	Probable oxidoreductase	0.05			216	0.999768	59.912	N
Q9I3D5	PA1583	sdhA	Succinate dehydrogenase flavoprotein subunit	0.05			509	0.99976	46.457	N
G3XDA5	PA0291	oprE	Anaerobically-induced outer membrane porin OprE	0.05			48	0.999746	107.29	N
Q9I692	PA0421	PA0421	Uncharacterized protein	0.4			84	0.999742	59.248	N
G3XDB2	PA0974	cpoB	Cell division coordinator CpoB	0.5			177	0.999731	61.765	N
Q9HXZ5	PA3635	eno	Enolase	0.1			18	0.999709	58.137	N
Q9I0A7	PA2735	PA2735	Probable restriction-modification system protein	0.3			191	0.999706	94.203	N
Q9I4W0	PA1013	purC	Phosphoribosylaminoimidazole-succinocarboxamide synthase	0.3			54	0.999688	40.045	N
Q9I2U2	PA1800	tig	Trigger factor	0.05			228	0.999687	115.87	N
Q9HU56	PA5128	secB	Protein-export protein SecB	0.2			74	0.999681	42.64	N
Q9I2W9	PA1770	ppsA	Phosphoenolpyruvate synthase	0.05			739	0.999674	40.589	N
Q9HY77	PA3533	PA3533	Glutaredoxin	0.4			25	0.999647	52.265	N
Q9I5G8	PA0767	lepA	Elongation factor 4	0.3			323	0.999641	95.195	N
Q9I3L9	PA1493	cysP	Sulfate-binding protein of ABC transporter	0.3			332	0.999641	55.186	N
Q9HVI7	PA4602	glyA2	Serine hydroxymethyltransferase 3	0.2			293	0.999629	83.137	N
Q9HYF4	PA3452	mqo1	Probable malate:quinone oxidoreductase 1	0.3			144	0.999617	47.155	N
Q9I0K0	PA2638	nuoB	NADH-quinone oxidoreductase subunit B	0.2			48	0.999596	72.705	N
Q51561	PA4270	rpoB	DNA-directed RNA polymerase subunit beta	0.05			226	0.999577	40.381	N
P72151	PA1092	fliC	B-type flagellin	0.05			6	0.999574	129.04	N
G3XD20	PA0766	mucD	Periplasmic serine endoprotease DegP-like	0.2			280	0.999551	63.408	N
Q9I2T8	PA1805	ppiD	Peptidylprolyl isomerase	0.1			176	0.99955	98.573	N
Q51561	PA4270	rpoB	DNA-directed RNA polymerase subunit beta	0.05			360	0.999539	106.93	N
P72151	PA1092	fliC	B-type flagellin	0.05			104	0.999514	110.6	N
Q9I2U2	PA1800	tig	Trigger factor	0.05			312	0.999504	74.92	N
Q51561	PA4270	rpoB	DNA-directed RNA polymerase subunit beta	0.05			1182	0.999494	46.296	N
Q9I4I1	PA1156	nrdA	Ribonucleoside-diphosphate reductase	0.1			806	0.99949	44.567	N
Q9I4R0	PA1064	PA1064	Uncharacterized protein	0.3			42	0.999437	43.594	N
Q9HVA9	PA4686	PA4686	Uncharacterized protein	0.5			713	0.999435	53.777	N
Q9I6H5	PA0316	serA	D-3-phosphoglycerate dehydrogenase	0.1			103	0.99942	63.091	N
P38100	PA4756	carB	Carbamoyl-phosphate synthase large chain	0.2			685	0.999408	51.726	N
Q9I5U6	PA0591	apaG	Protein ApaG	#N/A			9	0.999401	73.951	N
O82851	PA3655	tsf	Elongation factor Ts	0.05			131	0.9994	61.999	N
Q9I0M6	PA2612	serS	Serine--tRNA ligase	0.3			357	0.999396	63.185	N
Q9HV48	PA4751	ftsH	ATP-dependent zinc metalloprotease FtsH	0.2			368	0.999393	64.87	N
Q9HWF7	PA4241	rpsM	30S ribosomal protein S13	0.1			40	0.999384	54.004	N
Q9HXS5	PA3716	PA3716	Uncharacterized protein	0.2			208	0.999381	60.255	N
Q9HW68	PA4333	PA4333	Fumarate hydratase class I	0.2			104	0.999377	41.704	N
Q9I636	PA0482	glcB	Malate synthase G	0.1			644	0.999366	46.796	N
Q9I0J7	PA2641	nuoF	NADH-quinone oxidoreductase subunit F	0.2			98	0.999361	42.314	N
Q9I685	PA0432	ahcY	Adenosylhomocysteinase	0.05			276	0.999358	118.72	N
Q9I6M5	PA0265	davD	Glutarate-semialdehyde dehydrogenase DavD	0.1			86	0.999348	158.05	N
Q9HYD5	PA3471	maeA	NAD-dependent malic enzyme	0.2			66	0.999336	54.276	N
Q9HWF2	PA4246	rpsE	30S ribosomal protein S5	0.05			133	0.999309	77.324	N
Q9I0J6	PA2642	nuoG	NADH-quinone oxidoreductase subunit G	0.2			57	0.999308	45.368	N
O30506	PA0892	aotP	Arginine/ornithine transport ATP-binding protein AotP	0.4			239	0.999303	79.986	N
Q9HWE8	PA4250	rpsN	30S ribosomal protein S14	0.05			33	0.999302	69.352	N
Q9HYF4	PA3452	mqo1	Probable malate:quinone oxidoreductase 1	0.3			104	0.999293	93.096	N
Q51561	PA4270	rpoB	DNA-directed RNA polymerase subunit beta	0.05			573	0.999277	80.844	N
O52759	PA4239	rpsD	30S ribosomal protein S4	0.05			151	0.999276	77.748	N
G3XDB0	PA5332	crc	Catabolite repression control protein	0.3			214	0.999258	44.729	N
Q9I5A3	PA0837	slyD	Peptidyl-prolyl cis-trans isomerase	0.6			123	0.999243	114.96	N
Q9HXU0	PA3700	lysS	Lysine--tRNA ligase	0.2			16	0.999241	120.24	N
Q9I067	PA2776	PA2776	Uncharacterized protein	0.6			357	0.999229	96.903	N
Q9I0M6	PA2612	serS	Serine--tRNA ligase	0.3			401	0.999211	131.4	N
P05384	PA1804	hupB	DNA-binding protein HU-beta	0.05			62	0.999183	84.615	N
O69077	PA0904	lysC	Aspartokinase	0.2			55	0.999173	124.47	N
Q9HVI7	PA4602	glyA2	Serine hydroxymethyltransferase 3	0.2			350	0.99917	40.021	N
O30508	PA0895	aruC	Succinylornithine transaminase/acetylornithine aminotransferase	0.1			79	0.999169	53.168	N
Q9HT18	PA5556	atpA	ATP synthase subunit alpha	0.05			186	0.999165	240.38	N
Q9HX20	PA4007	proA	Gamma-glutamyl phosphate reductase	0.3			53	0.999149	94.45	N
Q9HUA5	PA5078	opgG	Glucans biosynthesis protein G	0.1			467	0.999146	83.435	N
Q9HWF7	PA4241	rpsM	30S ribosomal protein S13	0.1			74	0.999138	63.48	N
Q9I0A4	PA2739	pheT	Phenylalanine--tRNA ligase beta subunit	0.2			559	0.999129	97.473	N
P13981	PA5171	arcA	Arginine deiminase	0.05			379	0.999109	61.09	N
Q9I0A3	PA2740	pheS	Phenylalanine--tRNA ligase alpha subunit	0.3			22	0.9991	51.463	N
Q9HWC9	PA4269	rpoC	DNA-directed RNA polymerase subunit beta'	0.05			1399	0.999053	84.039	N
Q9I2T8	PA1805	ppiD	Peptidylprolyl isomerase	0.1			54	0.999052	84.208	N
Q9HXI8	PA3814	iscS	Cysteine desulfurase IscS	0.05			63	0.999023	43.813	N
Q9I689	PA0428	rhlE	ATP-dependent RNA helicase RhlE	0.2			423	0.999021	119.18	N
Q9I4I2	PA1155	nrdB	Ribonucleoside-diphosphate reductase subunit beta	0.4			95	0.998959	99.442	N
Q9HVA3	PA4693	pssA	Phosphatidylserine synthase	0.7			149	0.9989	53.554	N
Q9HV43	PA4761	dnaK	Chaperone protein DnaK	0.05			432	0.998898	198.99	N
Q9HWD0	PA4268	rpsL	30S ribosomal protein S12	0.05			5	0.998891	109.36	N
Q9HVV4	PA4464	ptsN	Nitrogen regulatory protein	0.6			48	0.99889	40.962	N
Q9I3G2	PA1555	ccoP2	Cbb3-type cytochrome c oxidase subunit	0.2			163	0.998871	42.568	N
Q9HVN5	PA4542	clpB	Chaperone protein ClpB	0.1			119	0.998839	48.656	N
Q9I291	PA2023	galU	UTP--glucose-1-phosphate uridylyltransferase	0.3			266	0.998834	88.836	N
Q9I0M2	PA2616	trxB1	Thioredoxin reductase	0.1			156	0.998754	57.216	N
Q9HWD5	PA4263	rplC	50S ribosomal protein L3	0.05			136	0.99867	80.507	N
P09591	PA4265; PA4277	tufA	Elongation factor Tu	0.05			9	0.998661	48.547	N
Q9I6M5	PA0265	davD	Glutarate-semialdehyde dehydrogenase DavD	0.1			31	0.998649	160.38	N
Q9I2W9	PA1770	ppsA	Phosphoenolpyruvate synthase	0.05			586	0.998594	46.334	N
P72173	PA3139	aspC	Aspartate aminotransferase	0.1			19	0.998551	53.278	N
O52759	PA4239	rpsD	30S ribosomal protein S4	0.05			196	0.998498	126.56	N
P08308	PA5172	arcB	Ornithine carbamoyltransferase, catabolic	0.05			171	0.998465	64.827	N
Q9I003	PA2840	deaD	ATP-dependent RNA helicase DeaD	0.3			514	0.998443	44.252	N
Q9I7B8	PA0008	glyS	Glycine--tRNA ligase beta subunit	0.2			71	0.998408	88.394	N
Q9HXJ4	PA3803	ispG	4-hydroxy-3-methylbut-2-en-1-yl diphosphate synthase (flavodoxin)	0.4			342	0.998322	102.73	N
Q9HY81	PA3529	PA3529	Probable peroxidase	0.05			174	0.99829	56.081	N
O69077	PA0904	lysC	Aspartokinase	0.2			329	0.998249	52.482	N
Q9HV48	PA4751	ftsH	ATP-dependent zinc metalloprotease FtsH	0.2			539	0.998246	86.367	N
Q9I4W3	PA1010	dapA	4-hydroxy-tetrahydrodipicolinate synthase	0.3			134	0.99822	46.249	N
Q9HVC4	PA4671	rplY	50S ribosomal protein L25	0.05			7	0.998159	95.358	N
Q9HUB5	PA5068	tatA	Sec-independent protein translocase protein TatA	0.4			44	0.998138	118.01	N
Q9I4I1	PA1156	nrdA	Ribonucleoside-diphosphate reductase	0.1			482	0.998134	105.53	N
P29363	PA3735	thrC	Threonine synthase	0.2			281	0.998062	43.297	N
P72151	PA1092	fliC	B-type flagellin	0.05			439	0.998049	128.92	N
Q9I2U1	PA1801	clpP1	ATP-dependent Clp protease proteolytic subunit 1	0.3			167	0.997973	163.18	N
Q9HXJ7	PA3800	bamB	Outer membrane protein assembly factor BamB	0.1			58	0.99786	100.24	N
Q9HVY6	PA4429	PA4429	Probable cytochrome c1	0.1			204	0.997847	59.227	N
P23926	PA1544	anr	Transcriptional activator protein anr	0.6			197	0.997794	57.788	N
Q9HZP8	PA2950	fabV	Enoyl-[acyl-carrier-protein] reductase [NADH]	0.2			353	0.997695	96.773	N
Q9HUG0	PA5005	PA5005	Probable carbamoyl transferase	0.2			243	0.997652	45.094	N
Q9I0A0	PA2743	infC	Translation initiation factor IF-3	0.2			22	0.997617	83.633	N
Q9I2T8	PA1805	ppiD	Peptidylprolyl isomerase	0.1			486	0.997499	93.623	N
P34750	PA5040	pilQ	Fimbrial assembly protein PilQ	0.2			255	0.997475	100.92	N
Q9HYE0	PA3466	PA3466	Probable ATP-dependent RNA helicase	0.3			213	0.997426	71.241	N
Q9HYD5	PA3471	maeA	NAD-dependent malic enzyme	0.2			345	0.997362	100.45	N
Q9HU73	PA5110	fbp	Fructose-1,6-bisphosphatase class 1	0.2			312	0.997312	91.961	N
Q9HXN2	PA3763	purL	Phosphoribosylformylglycinamidine synthase	0.2			246	0.997124	54.549	N
Q9I6J2	PA0299	spuC	Putrescine--pyruvate aminotransferase	0.2			282	0.997073	62.002	N
Q9HWE5	PA4253	rplN	50S ribosomal protein L14	0.05			13	0.997051	42.708	N
Q9HV55	PA4744	infB	Translation initiation factor IF-2	0.05			685	0.997029	62.7	N
Q9I690	PA0423	PA0423	UPF0312 protein PA0423	0.1			84	0.997028	70.197	N
Q9I6M5	PA0265	davD	Glutarate-semialdehyde dehydrogenase DavD	0.1			447	0.996971	100.95	N
P08308	PA5172	arcB	Ornithine carbamoyltransferase, catabolic	0.05			4	0.996878	53.554	N
P26276	PA5322	algC	Phosphomannomutase/phosphoglucomutase	0.1			128	0.996837	92.773	N
Q9I6L3	PA0277	PA0277	Uncharacterized protein	0.4			208	0.996834	48.527	N
Q9HU67	PA5117	typA	Regulatory protein TypA	0.2			69	0.996713	153.14	N
Q9HZ71	PA3162	rpsA	30S ribosomal protein S1	0.05			55	0.996687	131.31	N
Q9I2U2	PA1800	tig	Trigger factor	0.05			390	0.996589	66.568	N
Q9I2U2	PA1800	tig	Trigger factor	0.05			395	0.996495	101.9	N
G3XD94	PA3159	wbpA	UDP-N-acetyl-D-glucosamine 6-dehydrogenase	0.1			173	0.996417	99.86	N
Q9HVF9	PA4632	PA4632	Uncharacterized protein	0.4			112	0.996384	53.034	N
P47204	PA4407	ftsZ	Cell division protein FtsZ	0.2			375	0.996372	109.04	N
P57112	PA2991	sthA	Soluble pyridine nucleotide transhydrogenase	0.1			388	0.9963	46.88	N
Q9I3G2	PA1555	ccoP2	Cbb3-type cytochrome c oxidase subunit	0.2			159	0.996209	47.774	N
Q9I6H3	PA0318	PA0318	Uncharacterized protein	#N/A			137	0.99612	62.1	N
Q9X2T1	PA5240	trxA	Thioredoxin	0.3			64	0.99603	193.28	N
G3XD11	PA1178	oprH	PhoP/Q and low Mg2+ inducible outer membrane protein H1	0.05			49	0.995998	80.455	N
Q9HWF2	PA4246	rpsE	30S ribosomal protein S5	0.05			136	0.995936	60.489	N
Q9I685	PA0432	ahcY	Adenosylhomocysteinase	0.05			187	0.995883	103.97	N
Q9HXQ2	PA3742	rplS	50S ribosomal protein L19	0.05			15	0.995756	239.07	N
Q9I685	PA0432	ahcY	Adenosylhomocysteinase	0.05			197	0.99571	57.532	N
Q9I3D5	PA1583	sdhA	Succinate dehydrogenase flavoprotein subunit	0.05			165	0.995547	47.548	N
Q9HU67	PA5117	typA	Regulatory protein TypA	0.2			46	0.995536	88.338	N
Q9HTD9	PA5427	adhA	Alcohol dehydrogenase	0.2			323	0.995511	71.241	N
Q9HWF2	PA4246	rpsE	30S ribosomal protein S5	0.05			3	0.995275	84.479	N
Q9HW41	PA4360	PA4360	Uncharacterized protein	0.5			79	0.995175	43.066	N
Q9HVF1	PA4640	mqo2	Probable malate:quinone oxidoreductase 2	0.1			498	0.995102	74.841	N
Q9HZJ5	PA3011	topA	DNA topoisomerase 1	0.2			168	0.994965	52.683	N
Q9HTZ7	PA5192	pckA	Phosphoenolpyruvate carboxykinase (ATP)	0.1			471	0.994873	64.121	N
Q9I4P5	PA1084	flgI	Flagellar P-ring protein	#N/A			246	0.994813	41.53	N
P08308	PA5172	arcB	Ornithine carbamoyltransferase, catabolic	0.05			257	0.99478	83.966	N
P30718	PA4385	groL	60 kDa chaperonin	0.05			101	0.994692	100.44	N
Q9I2V5	PA1787	acnB	Aconitate hydratase B	0.05			113	0.99466	58.612	N
Q9HZM8	PA2976	rne	Ribonuclease E	0.05			7	0.994512	42.425	N
Q9HWC9	PA4269	rpoC	DNA-directed RNA polymerase subunit beta'	0.05			949	0.994422	53.965	N
Q9HVV8	PA4459	lptC	Lipopolysaccharide export system protein LptC	0.4			94	0.994333	47.189	N
Q9HU67	PA5117	typA	Regulatory protein TypA	0.2			71	0.994238	83.905	N
Q9HYF4	PA3452	mqo1	Probable malate:quinone oxidoreductase 1	0.3			495	0.994219	85.536	N
Q9HWC9	PA4269	rpoC	DNA-directed RNA polymerase subunit beta'	0.05			910	0.994152	64.779	N
Q9HWC8	PA4271	rplL	50S ribosomal protein L7/L12	0.05			10	0.994086	58.812	N
Q59637	PA5015	aceE	Pyruvate dehydrogenase E1 component	0.05			373	0.993826	88.056	N
Q9HVY4	PA4431	PA4431	Ubiquinol-cytochrome c reductase iron-sulfur subunit	0.05			53	0.993776	71.221	N
Q9HXZ5	PA3635	eno	Enolase	0.1			219	0.993738	142.9	N
Q9HV43	PA4761	dnaK	Chaperone protein DnaK	0.05			451	0.993721	128.75	N
Q9I7C2	PA0004	gyrB	DNA gyrase subunit B	0.2			624	0.993707	77.733	N
Q9I5A7	PA0833	PA0833	Uncharacterized protein	0.3			220	0.993689	56.055	N
Q9HTZ7	PA5192	pckA	Phosphoenolpyruvate carboxykinase (ATP)	0.1			468	0.993544	73.273	N
P72151	PA1092	fliC	B-type flagellin	0.05			56	0.99347	168.98	N
Q9HT80	PA5493	polA	DNA polymerase I	0.2			408	0.993422	41.088	N
Q9HTT7	PA5258	PA5258	Uncharacterized protein	0.2			173	0.99332	60.598	N
Q9HV55	PA4744	infB	Translation initiation factor IF-2	0.05			664	0.993201	65.149	N
Q9I3D3	PA1585	sucA	2-oxoglutarate dehydrogenase (E1 subunit)	0.1			652	0.993158	83.37	N
P13981	PA5171	arcA	Arginine deiminase	0.05			82	0.992882	163.68	N
Q9I0K0	PA2638	nuoB	NADH-quinone oxidoreductase subunit B	0.2			14	0.99281	78.69	N
Q9HV81	PA4717	PA4717	Uncharacterized protein	0.6			242	0.992644	58.284	N
Q9HWC9	PA4269	rpoC	DNA-directed RNA polymerase subunit beta'	0.05			1205	0.992476	90.653	N
Q51561	PA4270	rpoB	DNA-directed RNA polymerase subunit beta	0.05			689	0.992364	108.46	N
Q9HXN2	PA3763	purL	Phosphoribosylformylglycinamidine synthase	0.2			1001	0.99236	101.49	N
O54438	PA2967	fabG	3-oxoacyl-[acyl-carrier-protein] reductase FabG	0.05			111	0.99235	76.027	N
O82851	PA3655	tsf	Elongation factor Ts	0.05			241	0.99234	76.713	N
Q9I690	PA0423	PA0423	UPF0312 protein PA0423	0.1			77	0.992283	85.563	N
Q9HWD2	PA4266	fusA	Elongation factor G 1	0.05			150	0.992271	54.056	N
P47204	PA4407	ftsZ	Cell division protein FtsZ	0.2			254	0.991611	107.53	N
Q9I7B8	PA0008	glyS	Glycine--tRNA ligase beta subunit	0.2			377	0.991404	53.683	N
Q51422	PA0963	aspS	Aspartate--tRNA(Asp/Asn) ligase	0.1			379	0.991394	51.546	N
Q9HX33	PA3987	leuS	Leucine--tRNA ligase	0.2			754	0.991375	48.794	N
Q9HXI4	PA3818	suhB	Inositol-1-monophosphatase	0.5			171	0.991354	72.898	N
P14165	PA1580	gltA	Citrate synthase	0.05			197	0.99131	58.11	N
Q9HYT6	PA3308	rapA	RNA polymerase-associated protein RapA	0.3			846	0.991309	65.374	N
Q9HU50	PA5134	PA5134	Probable carboxyl-terminal protease	0.3			214	0.990885	48.323	N
Q9HXR3	PA3729	PA3729	Uncharacterized protein	0.2			296	0.99088	42.464	N
P21175	PA1074	braC	Leucine-, isoleucine-, valine-, threonine-, and alanine-binding protein	0.1			210	0.990808	62.966	N
Q9HWE1	PA4257	rpsC	30S ribosomal protein S3	0.05			140	0.99068	84.359	N
Q9I2V1	PA1791	PA1791	Uncharacterized protein	0.4			254	0.990592	61.958	N
Q9HTR6	PA5288	glnK	Nitrogen regulatory protein P-II 2	0.5			95	0.9901	57.55	N
Q9HVM4	PA4560	ileS	Isoleucine--tRNA ligase	0.2			158	0.989982	69.03	N
Q9HVY6	PA4429	PA4429	Probable cytochrome c1	0.1			226	0.98988	87.18	N
Q9I2U2	PA1800	tig	Trigger factor	0.05			298	0.989811	97.095	N
Q9HZP6	PA2952	etfB	Electron transfer flavoprotein subunit beta	0.05			169	0.989568	55.988	N
Q9HWF0	PA4248	rplF	50S ribosomal protein L6	0.05			73	0.989562	147.33	N
Q9HT16	PA5558	atpF	ATP synthase subunit b	0.1			114	0.989556	61.097	N
Q9I3I1	PA1532	dnaX	DNA polymerase III subunit gamma/tau	0.3			110	0.989224	41.684	N
Q9HVY3	PA4432	rpsI	30S ribosomal protein S9	0.05			6	0.989215	125.57	N
Q9I4I1	PA1156	nrdA	Ribonucleoside-diphosphate reductase	0.1			777	0.988362	83.022	N
Q9HWE3	PA4255	rpmC	50S ribosomal protein L29	0.2			15	0.988295	76.357	N
Q9HTY8	PA5201	PA5201	Uncharacterized protein	0.3			562	0.988276	70.76	N
Q9I0L4	PA2624	idh	Isocitrate dehydrogenase	0.1			703	0.988268	99.614	N
Q9HTZ7	PA5192	pckA	Phosphoenolpyruvate carboxykinase (ATP)	0.1			294	0.987773	129.77	N
Q9HZ71	PA3162	rpsA	30S ribosomal protein S1	0.05			362	0.987751	96.734	N
Q9HVE7	PA4645	PA4645	Probable purine/pyrimidine phosphoribosyl transferase	1			20	0.98744	58.158	N
Q9I3I5	PA1528	zipA	Cell division protein ZipA	0.3			171	0.98727	72.015	N
Q9I4I1	PA1156	nrdA	Ribonucleoside-diphosphate reductase	0.1			485	0.98714	54.768	N
P50601	PA0972	tolB	Protein TolB	0.1			103	0.986986	52.112	N
Q9HZ71	PA3162	rpsA	30S ribosomal protein S1	0.05			164	0.986872	98.997	N
O82853	PA3653	frr	Ribosome-recycling factor	0.3			56	0.986655	48.115	N
O52759	PA4239	rpsD	30S ribosomal protein S4	0.05			131	0.986296	66.335	N
Q9HXI4	PA3818	suhB	Inositol-1-monophosphatase	0.5			164	0.986004	240.8	N
Q9HWF7	PA4241	rpsM	30S ribosomal protein S13	0.1			58	0.985039	143.46	N
Q9I4I1	PA1156	nrdA	Ribonucleoside-diphosphate reductase	0.1			9	0.984987	137.62	N
Q9HWC9	PA4269	rpoC	DNA-directed RNA polymerase subunit beta'	0.05			209	0.984973	44.601	N
O52760	PA4238	rpoA	DNA-directed RNA polymerase subunit alpha	0.05			132	0.984332	100.71	N
Q9I2Y7	PA1750	PA1750	Phospho-2-dehydro-3-deoxyheptonate aldolase	0.2			256	0.983813	134.29	N
P08308	PA5172	arcB	Ornithine carbamoyltransferase, catabolic	0.05			312	0.983621	79.553	N
Q9I2U8	PA1794	glnS	Glutamine--tRNA ligase	0.2			365	0.983153	61.648	N
Q9I7C2	PA0004	gyrB	DNA gyrase subunit B	0.2			780	0.983097	67.239	N
P72173	PA3139	aspC	Aspartate aminotransferase	0.1			287	0.982774	83.701	N
Q9HWD8	PA4260	rplB	50S ribosomal protein L2	0.05			21	0.982627	136.27	N
Q9HTY8	PA5201	PA5201	Uncharacterized protein	0.3			268	0.982463	56.659	N
Q9HZG1	PA3047	PA3047	Probable D-alanyl-D-alanine carboxypeptidase	0.6			63	0.982375	80.593	N
Q9HWD2	PA4266	fusA	Elongation factor G 1	0.05			482;483	0.982371	100.11	N
Q9HU11	PA5178	PA5178	Uncharacterized protein	0.4			40	0.982323	41.871	N
Q51561	PA4270	rpoB	DNA-directed RNA polymerase subunit beta	0.05			771	0.981802	110.97	N
G3XD24	PA4309	pctA	Methyl-accepting chemotaxis protein PctA	0.3			406;406;409	0.981784	45.269	N
Q51561	PA4270	rpoB	DNA-directed RNA polymerase subunit beta	0.05			363	0.981673	174.95	N
Q59637	PA5015	aceE	Pyruvate dehydrogenase E1 component	0.05			319	0.981431	157.75	N
Q9HZK4	PA3001	PA3001	Glyceraldehyde-3-phosphate dehydrogenase	0.1			365	0.981142	91.547	N
Q9HZK4	PA3001	PA3001	Glyceraldehyde-3-phosphate dehydrogenase	0.1			367	0.980708	124.63	N
Q9I685	PA0432	ahcY	Adenosylhomocysteinase	0.05			199	0.980509	45.882	N
Q9HWC9	PA4269	rpoC	DNA-directed RNA polymerase subunit beta'	0.05			10	0.980118	178.95	N
Q9I3C5	PA1596	htpG	Chaperone protein HtpG	0.05			111	0.979935	47.574	N
Q9HVT7	PA4484	gatB	Aspartyl/glutamyl-tRNA(Asn/Gln) amidotransferase subunit B	0.2			432	0.979723	73.498	N
Q9HXZ2	PA3639	accA	Acetyl-coenzyme A carboxylase carboxyl transferase subunit alpha	0.2			27	0.979147	87.99	N
Q9I3B2	PA1609	fabB	Beta-ketoacyl-ACP synthase I	0.05			111	0.978981	125.73	N
Q9HWE4	PA4254	rpsQ	30S ribosomal protein S17	0.05			54	0.978968	147.4	N
Q9HX46	PA3970	amn	AMP nucleosidase	0.3			465	0.978928	41.302	N
Q9I689	PA0428	rhlE	ATP-dependent RNA helicase RhlE	0.2			147	0.978654	113.71	N
Q9HT16	PA5558	atpF	ATP synthase subunit b	0.1			143	0.97852	62.203	N
Q9I7C2	PA0004	gyrB	DNA gyrase subunit B	0.2			231	0.978458	105.52	N
Q9HT19	PA5555	atpG	ATP synthase gamma chain	0.1			248	0.978436	153.06	N
Q9I6M4	PA0266	davT	5-aminovalerate aminotransferase DavT	0.1			218	0.978423	41.83	N
Q9HYF4	PA3452	mqo1	Probable malate:quinone oxidoreductase 1	0.3			106	0.977661	85.672	N
Q9HWE9	PA4249	rpsH	30S ribosomal protein S8	0.2			16	0.977216	53.756	N
Q9HUM9	PA4935	rpsF	30S ribosomal protein S6	0.05			120	0.974579	177.5	N
P21175	PA1074	braC	Leucine-, isoleucine-, valine-, threonine-, and alanine-binding protein	0.1			149	0.974448	65.295	N
Q9HVC5	PA4670	prs	Ribose-phosphate pyrophosphokinase	0.05			199	0.974236	54.355	N
Q9I2U8	PA1794	glnS	Glutamine--tRNA ligase	0.2			516	0.973044	46.964	N
Q9HWK5	PA4176	ppiC2	Peptidylprolyl isomerase	0.6			71	0.973003	70.335	N
Q9I2U8	PA1794	glnS	Glutamine--tRNA ligase	0.2			266	0.972769	54.539	N
Q9HV58	PA4741	rpsO	30S ribosomal protein S15	0.05			35	0.972724	90.22	N
Q9HTV1	PA5239	rho	Transcription termination factor Rho	0.2			194	0.972655	67.997	N
Q9HUM9	PA4935	rpsF	30S ribosomal protein S6	0.05			53	0.972571	97.214	N
Q9I399	PA1623	PA1623	Uncharacterized protein	1			180	0.97248	71.697	N
Q9HVC4	PA4671	rplY	50S ribosomal protein L25	0.05			180	0.97222	120.64	N
Q9HUM3	PA4941	hflC	Protein HflC	0.1			288	0.971145	52.299	N
Q9HY84	PA3525	argG	Argininosuccinate synthase	0.1			29	0.971128	119.52	N
Q9HZK4	PA3001	PA3001	Glyceraldehyde-3-phosphate dehydrogenase	0.1			11	0.971039	110.84	N
P50601	PA0972	tolB	Protein TolB	0.1			56	0.970719	50.705	N
P72151	PA1092	fliC	B-type flagellin	0.05			428	0.969886	154.19	N
Q9I0J6	PA2642	nuoG	NADH-quinone oxidoreductase subunit G	0.2			763	0.969843	43.208	N
Q9I6B3	PA0382	trmB	tRNA (guanine-N(7)-)-methyltransferase	0.5			205	0.969788	90.308	N
Q9I5Z0	PA0546	metK	S-adenosylmethionine synthase	0.05			227	0.969561	120.6	N
Q9HUM2	PA4942	hflK	Protein HflK	0.1			232	0.969316	65.949	N
Q9HVJ1	PA4595	PA4595	Probable ATP-binding component of ABC transporter	0.2			139	0.969306	86.539	N
Q9HXI8	PA3814	iscS	Cysteine desulfurase IscS	0.05			267	0.969036	53.754	N
Q9HWD6	PA4262	rplD	50S ribosomal protein L4	0.05			4	0.968344	149	N
Q9HTZ7	PA5192	pckA	Phosphoenolpyruvate carboxykinase (ATP)	0.1			66	0.967976	57.61	N
Q9I2U8	PA1794	glnS	Glutamine--tRNA ligase	0.2			494	0.967602	53.342	N
Q9HTN8	PA5316	rpmB	50S ribosomal protein L28	0.05			32	0.966518	47.603	N
Q9I4I1	PA1156	nrdA	Ribonucleoside-diphosphate reductase	0.1			877	0.964402	47.618	N
G3XD74	PA3999	dacC	D-ala-D-ala-carboxypeptidase	0.1			205	0.963347	128.38	N
Q9I7C2	PA0004	gyrB	DNA gyrase subunit B	0.2			700	0.963032	85.231	N
P53593	PA1588	sucC	Succinate--CoA ligase [ADP-forming] subunit beta	0.05			353	0.962945	119.27	N
Q9HVC5	PA4670	prs	Ribose-phosphate pyrophosphokinase	0.05			10	0.962915	57.328	N
Q9HWF2	PA4246	rpsE	30S ribosomal protein S5	0.05			147	0.962791	123.79	N
Q9I748	PA0084	PA0084	Uncharacterized protein	0.2			289	0.962461	79.639	N
Q9I291	PA2023	galU	UTP--glucose-1-phosphate uridylyltransferase	0.3			150	0.962086	69.439	N
Q9HU73	PA5110	fbp	Fructose-1,6-bisphosphatase class 1	0.2			211	0.961834	69.47	N
Q9I7B7	PA0009	glyQ	Glycine--tRNA ligase alpha subunit	0.3			77	0.961814	53.554	N
Q9HT25	PA5549	glmS	Glutamine--fructose-6-phosphate aminotransferase [isomerizing]	0.2			535	0.961579	52.403	N
Q9HT19	PA5555	atpG	ATP synthase gamma chain	0.1			60	0.961122	85.864	N
Q9HX33	PA3987	leuS	Leucine--tRNA ligase	0.2			157	0.959657	107.21	N
Q51561	PA4270	rpoB	DNA-directed RNA polymerase subunit beta	0.05			1116	0.958508	47.803	N
G3XDA2	PA2965	fabF1	3-oxoacyl-[acyl-carrier-protein] synthase 2	0.2			368	0.958229	68.934	N
P00106	PA5490	cc4	Cytochrome c4	0.1			109	0.957695	53.453	N
Q9HT12	PA5562	spoOJ	Chromosome partitioning protein Spo0J	0.5			126	0.955777	56.215	N
Q9HZM8	PA2976	rne	Ribonuclease E	0.05			320	0.955028	109.65	N
P50601	PA0972	tolB	Protein TolB	0.1			240	0.954814	52.451	N
Q9HTD7	PA5429	aspA	Aspartate ammonia-lyase	0.2			140	0.954028	109.75	N
Q9I0A4	PA2739	pheT	Phenylalanine--tRNA ligase beta subunit	0.2			777	0.953451	102.24	N
G3XD72	PA1464	PA1464	Probable purine-binding chemotaxis protein	0.3			118	0.951591	48.711	N
Q9HZP8	PA2950	fabV	Enoyl-[acyl-carrier-protein] reductase [NADH]	0.2			355	0.951116	70.038	N
Q9HWD6	PA4262	rplD	50S ribosomal protein L4	0.05			6	0.951107	74.141	N
Q9I513	PA0945	purM	Phosphoribosylformylglycinamidine cyclo-ligase	0.4			349	0.951068	109.7	N
Q9HZE0	PA3068	gdhB	NAD-specific glutamate dehydrogenase	0.1			1178	0.950264	44.31	N
[truncated: 4,353 more rows]

## Sheet: 2 B. subtilis HA-yne mod.
Uniprot entry	Gene name (ordered locus )	Gene name	Protein name	Protein abundance (within top x%)	pAsp	Ann. site	Mod. site	Localization prob.	Score	Amino acid
P35163	BSU23120	resD	Transcriptional regulatory protein ResD	0.2	pAsp	57	57	1	142.32	D
O31688	BSU13850	zosA	Zinc-transporting ATPase (EC 7.2.2.-) (Zn(2+)-translocating P-type ATPase)	0.4	pAsp	337	337	1	149.52	D
P06628	BSU37130	spo0F	Sporulation initiation phosphotransferase F (EC 2.7.-.-) (Stage 0 sporulation protein F)	0.1	pAsp	54	54	0.999998	77.744	D
P14204	BSU31680	comA	Transcriptional regulatory protein ComA (Competence protein A)	0.3	pAsp	55	55	0.999993	208.88	D
P13792	BSU29110	phoP	Alkaline phosphatase synthesis transcriptional regulatory protein PhoP	0.2	pAsp	53	53	0.999868	49.463	D
P94504	BSU33220	yvrH	Transcriptional regulatory protein YvrH	0.4	pAsp	55	55	0.993518	59.189	D
O08336	BSU27160	cypB	Bifunctional cytochrome P450/NADPH--P450 reductase 2 (CYP102A3) (Fatty acid hydroxylase CypB) (Flavocytochrome P450 102A3) [Includes: Cytochrome P450 102A3 (EC 1.14.14.1); NADPH--cytochrome P450 reductase (EC 1.6.2.4)]	0.6			590	1	46.37	D
O08336	BSU27160	cypB	Bifunctional cytochrome P450/NADPH--P450 reductase 2 (CYP102A3) (Fatty acid hydroxylase CypB) (Flavocytochrome P450 102A3) [Includes: Cytochrome P450 102A3 (EC 1.14.14.1); NADPH--cytochrome P450 reductase (EC 1.6.2.4)]	0.6			591	1	46.37	D
P37887	BSU00730	cysK	Cysteine synthase (CSase) (EC 2.5.1.47) (O-acetylserine (thiol)-lyase) (OAS-TL) (Superoxide-inducible protein 11) (SOI11)	0.1			308	1	148.04	D
P07908	BSU28990	dnaB	Replication initiation and membrane attachment protein	0.6			367	1	53.554	D
P37869	BSU33900	eno	Enolase (EC 4.2.1.11) (2-phospho-D-glycerate hydro-lyase) (2-phosphoglycerate dehydratase)	0.1			124	1	81.807	D
P37869	BSU33900	eno	Enolase (EC 4.2.1.11) (2-phospho-D-glycerate hydro-lyase) (2-phosphoglycerate dehydratase)	0.1			6	1	82.645	D
P07343	BSU33040	fumC	Fumarate hydratase class II (Fumarase C) (EC 4.2.1.2) (Aerobic fumarase) (Iron-independent fumarase)	0.1			123	1	77.527	D
P80868	BSU01120	fusA	Elongation factor G (EF-G) (Vegetative protein 19) (VEG19)	0.1			143	1	66.393	D
P80868	BSU01120	fusA	Elongation factor G (EF-G) (Vegetative protein 19) (VEG19)	0.1			20	1	53.448	D
P80868	BSU01120	fusA	Elongation factor G (EF-G) (Vegetative protein 19) (VEG19)	0.1			335	1	56.139	D
P09124	BSU33940	gapA	Glyceraldehyde-3-phosphate dehydrogenase 1 (GAPDH) (EC 1.2.1.12) (NAD-dependent glyceraldehyde-3-phosphate dehydrogenase)	0.1			325	1	83.005	D
P18157	BSU09290	glpK	Glycerol kinase (EC 2.7.1.30) (ATP:glycerol 3-phosphotransferase) (Glycerokinase) (GK)	0.3			244	1	87.489	D
P29727	BSU06360	guaA	GMP synthase [glutamine-hydrolyzing] (EC 6.3.5.2) (GMP synthetase) (Glutamine amidotransferase)	#N/A			321	1	179.79	D
P12667	BSU03430	nucA	DNA-entry nuclease (EC 3.-.-.-) (Competence-specific nuclease)	0.3			4	1	77.748	D
P23129	BSU19370	odhA	2-oxoglutarate dehydrogenase E1 component (EC 1.2.4.2) (Alpha-ketoglutarate dehydrogenase)	#N/A			520	1	48.174	D
P21880	BSU14610	pdhD	Dihydrolipoyl dehydrogenase (EC 1.8.1.4) (Dihydrolipoamide dehydrogenase) (E3 component of pyruvate complex) (S complex, 50 kDa subunit)	0.1			84	1	117.65	D
P20166	BSU13890	ptsG	PTS system glucose-specific EIICBA component (EC 2.7.1.199) (EII-Glc/EIII-Glc) (EIICBA-Glc) (EIICBA-Glc 1) [Includes: Glucose permease IIC component (PTS system glucose-specific EIIC component); Glucose-specific phosphotransferase enzyme IIB component (PTS system glucose-specific EIIB component); Glucose-specific phosphotransferase enzyme IIA component (PTS system glucose-specific EIIA component)]	0.1			624	1	194.96	D
P08877	BSU13900	ptsH	Phosphocarrier protein HPr (Histidine-containing protein)	0.1			11	1	168.27	D
P08838	BSU13910	ptsI	Phosphoenolpyruvate-protein phosphotransferase (EC 2.7.3.9) (Phosphotransferase system, enzyme I)	0.1			182	1	134.15	D
P12877	BSU01280	rplE	50S ribosomal protein L5 (BL6)	0.1			153	1	98.408	D
Q06796	BSU01020	rplK	50S ribosomal protein L11 (BL11)	0.1			48	1	77.391	D
P19946	BSU01350	rplO	50S ribosomal protein L15	0.1			80	1	73.573	D
P21471	BSU01150	rpsJ	30S ribosomal protein S10 (BS13)	0.1			85	1	115.38	D
P33166	BSU01130	tuf	Elongation factor Tu (EF-Tu) (P-40)	0.1			101	1	130.78	D
O31990	BSU21500	uvrX	Putative UV-damage repair protein UvrX	0.6			16	1	43.027	D
P40775	BSU06250	ydjM	Uncharacterized protein YdjM (PSPA13)	0.7			99	1	80.763	D
O34669	BSU19210	yocH	Cell wall-binding protein YocH	0.4			264	1	107.9	D
P54572	BSU23550	yqkJ	Probable NAD-dependent malic enzyme 1 (NAD-ME 1) (EC 1.1.1.38)	0.3			118	1	44.847	D
P80868	BSU01120	fusA	Elongation factor G (EF-G) (Vegetative protein 19) (VEG19)	0.1			372	0.999999	75.376	D
P42921	BSU01170	rplD	50S ribosomal protein L4	0.1			120	0.999999	88.264	D
P21466	BSU29660	rpsD	30S ribosomal protein S4 (BS4)	0.1			91	0.999999	71.558	D
P80700	BSU16500	tsf	Elongation factor Ts (EF-Ts)	0.1			195	0.999999	95.417	D
P21465	BSU01220	rpsC	30S ribosomal protein S3 (BS3) (BS2)	0.1			180	0.999998	142.45	D
A3F3E2		hbs	Non-specific DNA-binding protein HBsu (Fragment)	0.1			20	0.999997	79.875	D
P08821	BSU22790	hupA	DNA-binding protein HU 1 (DNA-binding protein II) (HB)	0.1			26	0.999997	79.875	D
P33166	BSU01130	tuf	Elongation factor Tu (EF-Tu) (P-40)	0.1			269	0.999996	109.55	D
P80868	BSU01120	fusA	Elongation factor G (EF-G) (Vegetative protein 19) (VEG19)	0.1			81	0.999988	101.49	D
P08838	BSU13910	ptsI	Phosphoenolpyruvate-protein phosphotransferase (EC 2.7.3.9) (Phosphotransferase system, enzyme I)	0.1			305	0.999987	66.059	D
P70965	BSU36760	murAA	UDP-N-acetylglucosamine 1-carboxyvinyltransferase 1 (EC 2.5.1.7) (Enoylpyruvate transferase 1) (UDP-N-acetylglucosamine enolpyruvyl transferase 1) (EPT 1)	0.3			44	0.999983	79.511	D
P11998	BSU23250	ribH	6,7-dimethyl-8-ribityllumazine synthase (DMRL synthase) (LS) (Lumazine synthase) (EC 2.5.1.78) (Heavy riboflavin synthase beta subunit) (HRS beta subunit)	0.1			138	0.999983	65.038	D
P42976	BSU22490	dapB	4-hydroxy-tetrahydrodipicolinate reductase (HTPA reductase) (EC 1.17.1.8)	0.3			267	0.99998	70.889	D
P08877	BSU13900	ptsH	Phosphocarrier protein HPr (Histidine-containing protein)	0.1			30	0.999941	129.85	D
Q06797	BSU01030	rplA	50S ribosomal protein L1 (BL1)	0.1			39	0.999874	55.549	D
P33166	BSU01130	tuf	Elongation factor Tu (EF-Tu) (P-40)	0.1			49	0.999873	90.725	D
P21883	BSU14600	pdhC	Dihydrolipoyllysine-residue acetyltransferase component of pyruvate dehydrogenase complex (EC 2.3.1.12) (Dihydrolipoamide acetyltransferase component of pyruvate dehydrogenase complex) (E2) (S complex, 48 kDa subunit)	0.1			412	0.999864	41.905	D
P09124	BSU33940	gapA	Glyceraldehyde-3-phosphate dehydrogenase 1 (GAPDH) (EC 1.2.1.12) (NAD-dependent glyceraldehyde-3-phosphate dehydrogenase)	0.1			184	0.999858	43.12	D
P08838	BSU13910	ptsI	Phosphoenolpyruvate-protein phosphotransferase (EC 2.7.3.9) (Phosphotransferase system, enzyme I)	0.1			96	0.99985	56.956	D
O07530	BSU09350	yhdB	Uncharacterized protein YhdB	1			2	0.999837	61.999	D
A9LHR4		cpn60	60 kDa chaperonin (Fragment)	0.1			104	0.999726	52.887	D
P28598	BSU06030	groL	60 kDa chaperonin (GroEL protein) (Protein Cpn60) (Stress protein H5)	0.1			194	0.999726	52.887	D
C0SPB2	BSU35830	ywtG	Putative metabolite transport protein YwtG	0.9			438	0.999702	83.313	D
Q06797	BSU01030	rplA	50S ribosomal protein L1 (BL1)	0.1			22	0.999577	81.338	D
P21465	BSU01220	rpsC	30S ribosomal protein S3 (BS3) (BS2)	0.1			109	0.999448	132.31	D
P80868	BSU01120	fusA	Elongation factor G (EF-G) (Vegetative protein 19) (VEG19)	0.1			293	0.999349	67.115	D
P37869	BSU33900	eno	Enolase (EC 4.2.1.11) (2-phospho-D-glycerate hydro-lyase) (2-phosphoglycerate dehydratase)	0.1			379	0.998936	73.405	D
P96614	BSU04580	cshA	DEAD-box ATP-dependent RNA helicase CshA (EC 3.6.4.13)	0.1			237	0.998802	40.801	D
P21880	BSU14610	pdhD	Dihydrolipoyl dehydrogenase (EC 1.8.1.4) (Dihydrolipoamide dehydrogenase) (E3 component of pyruvate complex) (S complex, 50 kDa subunit)	0.1			131	0.998685	113.24	D
A3F3D6		ndk	Nucleoside diphosphate kinase (NDK) (NDP kinase) (EC 2.7.4.6) (Nucleoside-2-P kinase)	0.1			119	0.998476	72.898	D
P31103	BSU22730	ndk	Nucleoside diphosphate kinase (NDK) (NDP kinase) (EC 2.7.4.6) (Nucleoside-2-P kinase)	0.1			119	0.998476	72.898	D
P80868	BSU01120	fusA	Elongation factor G (EF-G) (Vegetative protein 19) (VEG19)	0.1			107	0.998411	96.54	D
O31742	BSU16040	rplS	50S ribosomal protein L19	0.1			16	0.998391	41.644	D
Q06796	BSU01020	rplK	50S ribosomal protein L11 (BL11)	0.1			141	0.99837	155.73	D
P80239	BSU40090	ahpC	Alkyl hydroperoxide reductase C (EC 1.11.1.26) (General stress protein 22) (Peroxiredoxin) (Thioredoxin peroxidase)	0.1			109	0.99826	75.695	D
P21880	BSU14610	pdhD	Dihydrolipoyl dehydrogenase (EC 1.8.1.4) (Dihydrolipoamide dehydrogenase) (E3 component of pyruvate complex) (S complex, 50 kDa subunit)	0.1			315	0.997758	47.392	D
P08877	BSU13900	ptsH	Phosphocarrier protein HPr (Histidine-containing protein)	0.1			69	0.997159	180.66	D
P21470	BSU01500	rpsI	30S ribosomal protein S9 (BS10)	0.1			91	0.996981	133.23	D
P33166	BSU01130	tuf	Elongation factor Tu (EF-Tu) (P-40)	0.1			157	0.996824	96.666	D
P33166	BSU01130	tuf	Elongation factor Tu (EF-Tu) (P-40)	0.1			207	0.996564	176.69	D
P08877	BSU13900	ptsH	Phosphocarrier protein HPr (Histidine-containing protein)	0.1			32	0.996298	118.71	D
P17820	BSU25470	dnaK	Chaperone protein DnaK (HSP70) (Heat shock 70 kDa protein) (Heat shock protein 70)	0.1			8	0.99585	40.622	D
P21883	BSU14600	pdhC	Dihydrolipoyllysine-residue acetyltransferase component of pyruvate dehydrogenase complex (EC 2.3.1.12) (Dihydrolipoamide acetyltransferase component of pyruvate dehydrogenase complex) (E2) (S complex, 48 kDa subunit)	0.1			135	0.995637	83.966	D
P42920	BSU01160	rplC	50S ribosomal protein L3 (BL3)	0.1			109	0.995596	59.872	D
P80868	BSU01120	fusA	Elongation factor G (EF-G) (Vegetative protein 19) (VEG19)	0.1			621	0.994804	53.909	D
P21880	BSU14610	pdhD	Dihydrolipoyl dehydrogenase (EC 1.8.1.4) (Dihydrolipoamide dehydrogenase) (E3 component of pyruvate complex) (S complex, 50 kDa subunit)	0.1			267	0.994509	63.989	D
P21468	BSU40910	rpsF	30S ribosomal protein S6 (BS9)	0.1			68	0.994306	42.322	D
P33166	BSU01130	tuf	Elongation factor Tu (EF-Tu) (P-40)	0.1			163	0.994179	72.583	D
P54375	BSU25020	sodA	Superoxide dismutase [Mn] (EC 1.15.1.1) (General stress protein 24) (GSP24)	0.1			60	0.993709	61.165	D
P80868	BSU01120	fusA	Elongation factor G (EF-G) (Vegetative protein 19) (VEG19)	0.1			87	0.992993	113.88	D
O07530	BSU09350	yhdB	Uncharacterized protein YhdB	1			7	0.992067	61.999	D
P21883	BSU14600	pdhC	Dihydrolipoyllysine-residue acetyltransferase component of pyruvate dehydrogenase complex (EC 2.3.1.12) (Dihydrolipoamide acetyltransferase component of pyruvate dehydrogenase complex) (E2) (S complex, 48 kDa subunit)	0.1			77	0.991069	52.366	D
P09124	BSU33940	gapA	Glyceraldehyde-3-phosphate dehydrogenase 1 (GAPDH) (EC 1.2.1.12) (NAD-dependent glyceraldehyde-3-phosphate dehydrogenase)	0.1			34	0.991021	90.03	D
C0SP93	BSU29210	accD	Acetyl-coenzyme A carboxylase carboxyl transferase subunit beta (ACCase subunit beta) (Acetyl-CoA carboxylase carboxyltransferase subunit beta) (EC 2.1.3.15)	0.2			290	0.990539	42.711	D
P33166	BSU01130	tuf	Elongation factor Tu (EF-Tu) (P-40)	0.1			195	0.986972	111.78	D
A3F3E2		hbs	Non-specific DNA-binding protein HBsu (Fragment)	0.1			24	0.985233	46.282	D
P08821	BSU22790	hupA	DNA-binding protein HU 1 (DNA-binding protein II) (HB)	0.1			30	0.985233	46.282	D
P21880	BSU14610	pdhD	Dihydrolipoyl dehydrogenase (EC 1.8.1.4) (Dihydrolipoamide dehydrogenase) (E3 component of pyruvate complex) (S complex, 50 kDa subunit)	0.1			293	0.984562	74.776	D
P80868	BSU01120	fusA	Elongation factor G (EF-G) (Vegetative protein 19) (VEG19)	0.1			572	0.984109	94.882	D
P80870	BSU31390	yugI	General stress protein 13 (GSP13)	0.1			56	0.982933	89.136	D
P13242	BSU37150	pyrG	CTP synthase (EC 6.3.4.2) (Cytidine 5'-triphosphate synthase) (Cytidine triphosphate synthetase) (CTP synthetase) (CTPS) (UTP--ammonia ligase)	0.2			452	0.981135	101.53	D
P80698	BSU28230	tig	Trigger factor (TF) (EC 5.2.1.8) (PPIase) (Vegetative protein 2) (VEG2)	0.1			310	0.980858	138.28	D
P39794	BSU07800	treP	PTS system trehalose-specific EIIBC component (EIIBC-Tre) (EII-Tre) [Includes: Trehalose-specific phosphotransferase enzyme IIB component (EC 2.7.1.201) (PTS system trehalose-specific EIIB component); Trehalose permease IIC component (PTS system trehalose-specific EIIC component)]	0.2			42	0.979996	46.276	D
P42962	BSU04040	ycsE	5-amino-6-(5-phospho-D-ribitylamino)uracil phosphatase YcsE (EC 3.1.3.104)	#N/A			16	0.975946	91.729	D
P80868	BSU01120	fusA	Elongation factor G (EF-G) (Vegetative protein 19) (VEG19)	0.1			304	0.973455	146.79	D
P21473	BSU16680	rpsO	30S ribosomal protein S15 (BS18)	0.1			34	0.971943	55.417	D
O32259	BSU34030	lutC	Lactate utilization protein C	0.1			217	0.970618	53.074	D
P42920	BSU01160	rplC	50S ribosomal protein L3 (BL3)	0.1			44	0.968784	173.37	D
P33166	BSU01130	tuf	Elongation factor Tu (EF-Tu) (P-40)	0.1			183	0.965305	127.76	D
Q07833	BSU39230	wapA	tRNA nuclease WapA (EC 3.1.-.-) (Cell wall-associated polypeptide CWBP200) (CWBP200) (RNase WapA) (Toxin WapA) (Wall-associated protein)	0.1			1343	0.964722	45.336	D
P14192	BSU00500	glmU	Bifunctional protein GlmU [Includes: UDP-N-acetylglucosamine pyrophosphorylase (EC 2.7.7.23) (N-acetylglucosamine-1-phosphate uridyltransferase); Glucosamine-1-phosphate N-acetyltransferase (EC 2.3.1.157)]	0.2			177	0.963662	79.492	D
P18255	BSU28950	thrS	Threonine--tRNA ligase 1 (EC 6.1.1.3) (Threonyl-tRNA synthetase 1) (ThrRS 1)	0.1			607	0.962582	74.428	D
P33166	BSU01130	tuf	Elongation factor Tu (EF-Tu) (P-40)	0.1			218	0.959431	76.704	D
P17820	BSU25470	dnaK	Chaperone protein DnaK (HSP70) (Heat shock 70 kDa protein) (Heat shock protein 70)	0.1			479	0.952752	67.879	D
P21464	BSU16490	rpsB	30S ribosomal protein S2 (BS1) (Vegetative protein 209) (VEG209)	0.1			192	0.952117	157.96	D
P54542	BSU23910	yqjE	Uncharacterized protein YqjE	0.2			240	0.951423	88.945	D
Q06797	BSU01030	rplA	50S ribosomal protein L1 (BL1)	0.1			182	0.947777	66.429	D
P33166	BSU01130	tuf	Elongation factor Tu (EF-Tu) (P-40)	0.1			198	0.946976	77.191	D
P80239	BSU40090	ahpC	Alkyl hydroperoxide reductase C (EC 1.11.1.26) (General stress protein 22) (Peroxiredoxin) (Thioredoxin peroxidase)	0.1			112	0.946593	101.72	D
P18157	BSU09290	glpK	Glycerol kinase (EC 2.7.1.30) (ATP:glycerol 3-phosphotransferase) (Glycerokinase) (GK)	0.3			199	0.945981	55.314	D
P21465	BSU01220	rpsC	30S ribosomal protein S3 (BS3) (BS2)	0.1			182	0.945253	57.148	D
P37877	BSU29470	ackA	Acetate kinase (EC 2.7.2.1) (Acetokinase)	0.1			59	0.94427	78.505	D
P37809	BSU36810	atpD	ATP synthase subunit beta (EC 7.1.2.2) (ATP synthase F1 sector subunit beta) (F-ATPase subunit beta) (Vegetative protein 31) (VEG31)	0.1			246	0.943838	54.281	D
P21880	BSU14610	pdhD	Dihydrolipoyl dehydrogenase (EC 1.8.1.4) (Dihydrolipoamide dehydrogenase) (E3 component of pyruvate complex) (S complex, 50 kDa subunit)	0.1			5	0.941873	85.248	D
P80868	BSU01120	fusA	Elongation factor G (EF-G) (Vegetative protein 19) (VEG19)	0.1			574	0.940256	56.424	D
P46898	BSU01310	rplF	50S ribosomal protein L6 (BL10)	0.1			48	0.936297	45.873	D
P42923	BSU01040	rplJ	50S ribosomal protein L10 (BL5) (Cold acclimatization protein) (CAP) (Vegetative protein 300) (VEG300)	0.1			74	0.93435	46.772	D
P37869	BSU33900	eno	Enolase (EC 4.2.1.11) (2-phospho-D-glycerate hydro-lyase) (2-phosphoglycerate dehydratase)	0.1			291	0.931805	59.9	D
P13243	BSU37120	fbaA	Probable fructose-bisphosphate aldolase (FBP aldolase) (FBPA) (EC 4.1.2.13) (Fructose-1,6-bisphosphate aldolase)	0.1			256	0.928219	64.224	D
P42919	BSU01190	rplB	50S ribosomal protein L2 (BL2)	0.1			84	0.926928	56.013	D
P42060	BSU01210	rplV	50S ribosomal protein L22	0.1			65	0.92208	93.295	D
P17820	BSU25470	dnaK	Chaperone protein DnaK (HSP70) (Heat shock 70 kDa protein) (Heat shock protein 70)	0.1			203	0.920644	72.568	D
P80868	BSU01120	fusA	Elongation factor G (EF-G) (Vegetative protein 19) (VEG19)	0.1			100	0.916038	51.827	D
P21882	BSU14590	pdhB	Pyruvate dehydrogenase E1 component subunit beta (EC 1.2.4.1) (S complex, 36 kDa subunit)	0.1			131	0.907183	94.276	D
P21881	BSU14580	pdhA	Pyruvate dehydrogenase E1 component subunit alpha (EC 1.2.4.1) (S complex, 42 kDa subunit) (Vegetative protein 220) (VEG220)	0.1			183	0.88904	65.423	D
Q06796	BSU01020	rplK	50S ribosomal protein L11 (BL11)	0.1			63	0.887173	135.37	D
P32081	BSU09100	cspB	Cold shock protein CspB (Major cold shock protein)	0.1			24	0.857593	177.6	D
P33166	BSU01130	tuf	Elongation factor Tu (EF-Tu) (P-40)	0.1			242	0.854918	121.99	D
P37877	BSU29470	ackA	Acetate kinase (EC 2.7.2.1) (Acetokinase)	0.1			381	0.852851	88.163	D
P80868	BSU01120	fusA	Elongation factor G (EF-G) (Vegetative protein 19) (VEG19)	0.1			222	0.834008	104.88	D
P21467	BSU01330	rpsE	30S ribosomal protein S5 (BS5)	0.1			66	0.831816	76.035	D
P40924	BSU33930	pgk	Phosphoglycerate kinase (EC 2.7.2.3)	0.1			92	0.825099	56.205	D
P26899	BSU23570	ansB	Aspartate ammonia-lyase (Aspartase) (EC 4.3.1.1)	0.3			275	0.812701	61.958	D
P18157	BSU09290	glpK	Glycerol kinase (EC 2.7.1.30) (ATP:glycerol 3-phosphotransferase) (Glycerokinase) (GK)	0.3			336	0.812216	88.627	D
P80875	BSU02900	yceD	General stress protein 16U (GSP16U)	0.1			60	0.8122	53.886	D
P08838	BSU13910	ptsI	Phosphoenolpyruvate-protein phosphotransferase (EC 2.7.3.9) (Phosphotransferase system, enzyme I)	0.1			311	0.791686	88.282	D
P21882	BSU14590	pdhB	Pyruvate dehydrogenase E1 component subunit beta (EC 1.2.4.1) (S complex, 36 kDa subunit)	0.1			245	0.786367	41.695	D
P12877	BSU01280	rplE	50S ribosomal protein L5 (BL6)	0.1			142	0.767079	47.189	D
P50866	BSU28220	clpX	ATP-dependent Clp protease ATP-binding subunit ClpX	0.1			338	0.758006	63.184	D
P37809	BSU36810	atpD	ATP synthase subunit beta (EC 7.1.2.2) (ATP synthase F1 sector subunit beta) (F-ATPase subunit beta) (Vegetative protein 31) (VEG31)	0.1			20	0.750092	50.088	D
P13800	BSU35490	degU	Transcriptional regulatory protein DegU (Protease production enhancer protein)	0.1	pAsp	56	30	0.952436	60.398	E
P49787	BSU24340	accC1	Biotin carboxylase 1 (EC 6.3.4.14) (Acetyl-CoA carboxylase subunit A 1) (ACC 1) (EC 6.4.1.2)	0.2			289	1	61.161	E
P39772	BSU22360	asnS	Asparagine--tRNA ligase (EC 6.1.1.22) (Asparaginyl-tRNA synthetase) (AsnRS)	0.1			51	1	156.48	E
P37809	BSU36810	atpD	ATP synthase subunit beta (EC 7.1.2.2) (ATP synthase F1 sector subunit beta) (F-ATPase subunit beta) (Vegetative protein 31) (VEG31)	0.1			263	1	74.475	E
P37809	BSU36810	atpD	ATP synthase subunit beta (EC 7.1.2.2) (ATP synthase F1 sector subunit beta) (F-ATPase subunit beta) (Vegetative protein 31) (VEG31)	0.1			418	1	42.068	E
P37809	BSU36810	atpD	ATP synthase subunit beta (EC 7.1.2.2) (ATP synthase F1 sector subunit beta) (F-ATPase subunit beta) (Vegetative protein 31) (VEG31)	0.1			237	1	131.06	E
P32081	BSU09100	cspB	Cold shock protein CspB (Major cold shock protein)	0.1			12	1	89.698	E
Q04796	BSU16770	dapA	4-hydroxy-tetrahydrodipicolinate synthase (HTPA synthase) (EC 4.3.3.7)	0.1			289	1	45.382	E
P17820	BSU25470	dnaK	Chaperone protein DnaK (HSP70) (Heat shock 70 kDa protein) (Heat shock protein 70)	0.1			31	1	47.603	E
P51831	BSU15910	fabG	3-oxoacyl-[acyl-carrier-protein] reductase FabG (EC 1.1.1.100) (3-ketoacyl-acyl carrier protein reductase) (Beta-Ketoacyl-acyl carrier protein reductase) (Beta-ketoacyl-ACP reductase)	0.1			39	1	59.673	E
P13243	BSU37120	fbaA	Probable fructose-bisphosphate aldolase (FBP aldolase) (FBPA) (EC 4.1.2.13) (Fructose-1,6-bisphosphate aldolase)	0.1			187	1	57.177	E
P13243	BSU37120	fbaA	Probable fructose-bisphosphate aldolase (FBP aldolase) (FBPA) (EC 4.1.2.13) (Fructose-1,6-bisphosphate aldolase)	0.1			235	1	65.043	E
P13243	BSU37120	fbaA	Probable fructose-bisphosphate aldolase (FBP aldolase) (FBPA) (EC 4.1.2.13) (Fructose-1,6-bisphosphate aldolase)	0.1			8	1	65.03	E
P80868	BSU01120	fusA	Elongation factor G (EF-G) (Vegetative protein 19) (VEG19)	0.1			252	1	72.359	E
P80868	BSU01120	fusA	Elongation factor G (EF-G) (Vegetative protein 19) (VEG19)	0.1			471	1	113.61	E
P09124	BSU33940	gapA	Glyceraldehyde-3-phosphate dehydrogenase 1 (GAPDH) (EC 1.2.1.12) (NAD-dependent glyceraldehyde-3-phosphate dehydrogenase)	0.1			203	1	67.326	E
P09124	BSU33940	gapA	Glyceraldehyde-3-phosphate dehydrogenase 1 (GAPDH) (EC 1.2.1.12) (NAD-dependent glyceraldehyde-3-phosphate dehydrogenase)	0.1			222	1	43.308	E
P09124	BSU33940	gapA	Glyceraldehyde-3-phosphate dehydrogenase 1 (GAPDH) (EC 1.2.1.12) (NAD-dependent glyceraldehyde-3-phosphate dehydrogenase)	0.1			73	1	107.09	E
P12425	BSU17460	glnA	Glutamine synthetase (GS) (EC 6.3.1.2) (Glutamate--ammonia ligase) (Glutamine synthetase I alpha) (GSI alpha)	0.1			436	1	61.161	E
P18157	BSU09290	glpK	Glycerol kinase (EC 2.7.1.30) (ATP:glycerol 3-phosphotransferase) (Glycerokinase) (GK)	0.3			2	1	105.53	E
P18157	BSU09290	glpK	Glycerol kinase (EC 2.7.1.30) (ATP:glycerol 3-phosphotransferase) (Glycerokinase) (GK)	0.3			282	1	159.18	E
P28599	BSU06020	groS	10 kDa chaperonin (GroES protein) (Protein Cpn10)	0.1			12	1	170.47	E
P02968	BSU35360	hag	Flagellin (GSX1) (Hag)	0.1			243	1	95.48	E
A3F3E2		hbs	Non-specific DNA-binding protein HBsu (Fragment)	0.1			45	1	85.522	E
A3F3E2		hbs	Non-specific DNA-binding protein HBsu (Fragment)	0.1			51	1	85.522	E
P37472	BSU00680	hprT	Hypoxanthine-guanine phosphoribosyltransferase (HGPRT) (HGPRTase) (EC 2.4.2.8)	0.1			179	1	78.191	E
P08821	BSU22790	hupA	DNA-binding protein HU 1 (DNA-binding protein II) (HB)	0.1			51	1	85.522	E
P17889	BSU16630	infB	Translation initiation factor IF-2	0.1			647	1	45.723	E
O31644	BSU12000	manR	Transcriptional regulator ManR (Mannose operon transcriptional activator) [Includes: Putative phosphotransferase enzyme IIB component (EC 2.7.1.191) (Putative PTS system EIIB component); Putative phosphotransferase enzyme IIA component (Putative PTS system EIIA component)]	0.8			531	1	82.417	E
O32169	BSU32750	metN	Methionine import ATP-binding protein MetN (EC 7.4.2.11)	0.2			55	1	69.344	E
P23129	BSU19370	odhA	2-oxoglutarate dehydrogenase E1 component (EC 1.2.4.2) (Alpha-ketoglutarate dehydrogenase)	#N/A			519	1	48.174	E
P21881	BSU14580	pdhA	Pyruvate dehydrogenase E1 component subunit alpha (EC 1.2.4.1) (S complex, 42 kDa subunit) (Vegetative protein 220) (VEG220)	0.1			259	1	105.14	E
P21881	BSU14580	pdhA	Pyruvate dehydrogenase E1 component subunit alpha (EC 1.2.4.1) (S complex, 42 kDa subunit) (Vegetative protein 220) (VEG220)	0.1			96	1	100.19	E
P21881	BSU14580	pdhA	Pyruvate dehydrogenase E1 component subunit alpha (EC 1.2.4.1) (S complex, 42 kDa subunit) (Vegetative protein 220) (VEG220)	0.1			214	1	105.52	E
P21882	BSU14590	pdhB	Pyruvate dehydrogenase E1 component subunit beta (EC 1.2.4.1) (S complex, 36 kDa subunit)	0.1			286	1	112.13	E
P21882	BSU14590	pdhB	Pyruvate dehydrogenase E1 component subunit beta (EC 1.2.4.1) (S complex, 36 kDa subunit)	0.1			262	1	110.12	E
P21883	BSU14600	pdhC	Dihydrolipoyllysine-residue acetyltransferase component of pyruvate dehydrogenase complex (EC 2.3.1.12) (Dihydrolipoamide acetyltransferase component of pyruvate dehydrogenase complex) (E2) (S complex, 48 kDa subunit)	0.1			379	1	65.893	E
P21883	BSU14600	pdhC	Dihydrolipoyllysine-residue acetyltransferase component of pyruvate dehydrogenase complex (EC 2.3.1.12) (Dihydrolipoamide acetyltransferase component of pyruvate dehydrogenase complex) (E2) (S complex, 48 kDa subunit)	0.1			98	1	135.8	E
P21883	BSU14600	pdhC	Dihydrolipoyllysine-residue acetyltransferase component of pyruvate dehydrogenase complex (EC 2.3.1.12) (Dihydrolipoamide acetyltransferase component of pyruvate dehydrogenase complex) (E2) (S complex, 48 kDa subunit)	0.1			441	1	107.21	E
P21880	BSU14610	pdhD	Dihydrolipoyl dehydrogenase (EC 1.8.1.4) (Dihydrolipoamide dehydrogenase) (E3 component of pyruvate complex) (S complex, 50 kDa subunit)	0.1			118	1	114.89	E
P21880	BSU14610	pdhD	Dihydrolipoyl dehydrogenase (EC 1.8.1.4) (Dihydrolipoamide dehydrogenase) (E3 component of pyruvate complex) (S complex, 50 kDa subunit)	0.1			256	1	81.428	E
P21880	BSU14610	pdhD	Dihydrolipoyl dehydrogenase (EC 1.8.1.4) (Dihydrolipoamide dehydrogenase) (E3 component of pyruvate complex) (S complex, 50 kDa subunit)	0.1			153	1	65.511	E
P40924	BSU33930	pgk	Phosphoglycerate kinase (EC 2.7.2.3)	0.1			232	1	42.474	E
P40924	BSU33930	pgk	Phosphoglycerate kinase (EC 2.7.2.3)	0.1			340	1	115.86	E
P50849	BSU16690	pnp	Polyribonucleotide nucleotidyltransferase (EC 2.7.7.8) (Polynucleotide phosphorylase) (PNPase) (Vegetative protein 15) (VEG15)	0.1			237	1	205.83	E
P14193	BSU00510	prs	Ribose-phosphate pyrophosphokinase (RPPK) (EC 2.7.6.1) (5-phospho-D-ribosyl alpha-1-diphosphate) (Phosphoribosyl diphosphate synthase) (Phosphoribosyl pyrophosphate synthase) (P-Rib-PP synthase) (PPRibP synthase) (PRPP synthase) (PRPPase)	0.1			308	1	108.37	E
P24327	BSU09950	prsA	Foldase protein PrsA (EC 5.2.1.8)	0.1			60	1	58.32	E
P20166	BSU13890	ptsG	PTS system glucose-specific EIICBA component (EC 2.7.1.199) (EII-Glc/EIII-Glc) (EIICBA-Glc) (EIICBA-Glc 1) [Includes: Glucose permease IIC component (PTS system glucose-specific EIIC component); Glucose-specific phosphotransferase enzyme IIB component (PTS system glucose-specific EIIB component); Glucose-specific phosphotransferase enzyme IIA component (PTS system glucose-specific EIIA component)]	0.1			490	1	80.859	E
P08877	BSU13900	ptsH	Phosphocarrier protein HPr (Histidine-containing protein)	0.1			60	1	171.29	E
P08838	BSU13910	ptsI	Phosphoenolpyruvate-protein phosphotransferase (EC 2.7.3.9) (Phosphotransferase system, enzyme I)	0.1			398	1	54.343	E
P08838	BSU13910	ptsI	Phosphoenolpyruvate-protein phosphotransferase (EC 2.7.3.9) (Phosphotransferase system, enzyme I)	0.1			259	1	116.73	E
P08838	BSU13910	ptsI	Phosphoenolpyruvate-protein phosphotransferase (EC 2.7.3.9) (Phosphotransferase system, enzyme I)	0.1			198	1	117.7	E
Q06797	BSU01030	rplA	50S ribosomal protein L1 (BL1)	0.1			43	1	122.44	E
P42920	BSU01160	rplC	50S ribosomal protein L3 (BL3)	0.1			87	1	210.98	E
P42920	BSU01160	rplC	50S ribosomal protein L3 (BL3)	0.1			100	1	124.07	E
P46898	BSU01310	rplF	50S ribosomal protein L6 (BL10)	0.1			89	1	105.1	E
P46898	BSU01310	rplF	50S ribosomal protein L6 (BL10)	0.1			78	1	53.252	E
P42923	BSU01040	rplJ	50S ribosomal protein L10 (BL5) (Cold acclimatization protein) (CAP) (Vegetative protein 300) (VEG300)	0.1			128	1	68.224	E
P70974	BSU01490	rplM	50S ribosomal protein L13	0.1			32	1	43.272	E
P70974	BSU01490	rplM	50S ribosomal protein L13	0.1			13	1	86.772	E
P19946	BSU01350	rplO	50S ribosomal protein L15	0.1			144	1	134.77	E
P19946	BSU01350	rplO	50S ribosomal protein L15	0.1			51	1	60.062	E
P14577	BSU01230	rplP	50S ribosomal protein L16	0.1			91	1	46.797	E
P14577	BSU01230	rplP	50S ribosomal protein L16	0.1			80	1	40.801	E
P14577	BSU01230	rplP	50S ribosomal protein L16	0.1			105	1	99.343	E
P20277	BSU01440	rplQ	50S ribosomal protein L17 (BL15) (BL21)	0.1			69	1	119.54	E
O31742	BSU16040	rplS	50S ribosomal protein L19	0.1			44	1	59.645	E
O31742	BSU16040	rplS	50S ribosomal protein L19	0.1			71	1	51.286	E
P26908	BSU27960	rplU	50S ribosomal protein L21 (BL20)	0.1			23	1	80.763	E
P26908	BSU27960	rplU	50S ribosomal protein L21 (BL20)	0.1			54	1	83.045	E
P42060	BSU01210	rplV	50S ribosomal protein L22	0.1			31	1	69.456	E
P42060	BSU01210	rplV	50S ribosomal protein L22	0.1			109	1	110.08	E
Q03223	BSU37070	rpmE	50S ribosomal protein L31	0.1			34	1	128.22	E
P20278	BSU01400	rpmJ	50S ribosomal protein L36 (BL38) (Ribosomal protein B) (Ribosomal protein II)	0.1			28	1	78.149	E
P20429	BSU01430	rpoA	DNA-directed RNA polymerase subunit alpha (RNAP subunit alpha) (EC 2.7.7.6) (RNA polymerase subunit alpha) (Transcriptase subunit alpha)	0.1			181	1	61.765	E
P37871	BSU01080	rpoC	DNA-directed RNA polymerase subunit beta' (RNAP subunit beta') (EC 2.7.7.6) (RNA polymerase subunit beta') (Transcriptase subunit beta')	0.1			512	1	47.971	E
P37871	BSU01080	rpoC	DNA-directed RNA polymerase subunit beta' (RNAP subunit beta') (EC 2.7.7.6) (RNA polymerase subunit beta') (Transcriptase subunit beta')	0.1			505	1	96.903	E
P37871	BSU01080	rpoC	DNA-directed RNA polymerase subunit beta' (RNAP subunit beta') (EC 2.7.7.6) (RNA polymerase subunit beta') (Transcriptase subunit beta')	0.1			635	1	69.628	E
P37871	BSU01080	rpoC	DNA-directed RNA polymerase subunit beta' (RNAP subunit beta') (EC 2.7.7.6) (RNA polymerase subunit beta') (Transcriptase subunit beta')	0.1			284	1	83.692	E
P21464	BSU16490	rpsB	30S ribosomal protein S2 (BS1) (Vegetative protein 209) (VEG209)	0.1			63	1	48.787	E
P21465	BSU01220	rpsC	30S ribosomal protein S3 (BS3) (BS2)	0.1			165	1	121.99	E
P21466	BSU29660	rpsD	30S ribosomal protein S4 (BS4)	0.1			84	1	96.464	E
P21467	BSU01330	rpsE	30S ribosomal protein S5 (BS5)	0.1			73	1	106.75	E
P12879	BSU01300	rpsH	30S ribosomal protein S8 (BS8)	0.1			126	1	51.268	E
P04969	BSU01420	rpsK	30S ribosomal protein S11 (BS11)	0.1			108	1	107.83	E
P04969	BSU01420	rpsK	30S ribosomal protein S11 (BS11)	0.1			70	1	104.76	E
P04969	BSU01420	rpsK	30S ribosomal protein S11 (BS11)	0.1			85	1	58.917	E
P21472	BSU01100	rpsL	30S ribosomal protein S12 (BS12)	0.1			121	1	120.99	E
P21472	BSU01100	rpsL	30S ribosomal protein S12 (BS12)	0.1			34	1	72.652	E
P20282	BSU01410	rpsM	30S ribosomal protein S13 (BS14)	0.1			72	1	55.37	E
P21474	BSU15990	rpsP	30S ribosomal protein S16 (BS17)	0.1			48	1	72.819	E
P12874	BSU01250	rpsQ	30S ribosomal protein S17 (BS16)	0.1			65	1	78.043	E
P21475	BSU40890	rpsR	30S ribosomal protein S18 (BS21)	0.1			79	1	204.36	E
P21476	BSU01200	rpsS	30S ribosomal protein S19 (BS19)	0.1			73	1	62.546	E
P37464	BSU00130	serS	Serine--tRNA ligase (EC 6.1.1.11) (Seryl-tRNA synthetase) (SerRS) (Seryl-tRNA(Ser/Sec) synthetase)	0.2			54	1	61.815	E
P54375	BSU25020	sodA	Superoxide dismutase [Mn] (EC 1.15.1.1) (General stress protein 24) (GSP24)	0.1			44	1	80.438	E
P71088	BSU08760	spo0M	Sporulation-control protein spo0M (Stage 0 sporulation protein M)	0.2			23	1	124.83	E
P80866	BSU32710	sufC	Vegetative protein 296 (VEG296)	0.1			196	1	103.88	E
P80698	BSU28230	tig	Trigger factor (TF) (EC 5.2.1.8) (PPIase) (Vegetative protein 2) (VEG2)	0.1			102	1	89.542	E
P80698	BSU28230	tig	Trigger factor (TF) (EC 5.2.1.8) (PPIase) (Vegetative protein 2) (VEG2)	0.1			115	1	58.981	E
P80700	BSU16500	tsf	Elongation factor Ts (EF-Ts)	0.1			58	1	56.043	E
P33166	BSU01130	tuf	Elongation factor Tu (EF-Tu) (P-40)	0.1			310	1	117.4	E
P33166	BSU01130	tuf	Elongation factor Tu (EF-Tu) (P-40)	0.1			192	1	171.46	E
P33166	BSU01130	tuf	Elongation factor Tu (EF-Tu) (P-40)	0.1			262	1	146.69	E
P33166	BSU01130	tuf	Elongation factor Tu (EF-Tu) (P-40)	0.1			396	1	167.04	E
O34542	BSU07650	yflK	Uncharacterized protein YflK	0.4			154	1	63.653	E
O34542	BSU07650	yflK	Uncharacterized protein YflK	0.4			155	1	63.653	E
P80861	BSU12290	yjlD	NADH dehydrogenase-like protein YjlD (EC 1.6.99.-) (Glucose starvation-inducible protein 5) (GSI5)	0.1			57	1	40.058	E
O31716	BSU14430	ykpA	Uncharacterized ABC transporter ATP-binding protein YkpA	0.2			540	1	109.88	E
O34588	BSU14100	ykuJ	Uncharacterized protein YkuJ	0.1			49	1	51.252	E
O31689	BSU13860	ykvY	Putative dipeptidase YkvY (EC 3.4.13.-)	0.3			103	1	59.227	E
P50829	BSU22230	ypqE	Putative phosphotransferase enzyme IIA component YpqE (Putative PTS system EIIA component)	0.2			92	1	146.64	E
O32060	BSU27810	yrbD	Putative sodium/proton-dependent alanine carrier protein YrbD	1			132	1	52.79	E
O32052	BSU27700	yrbF	Sec translocon accessory complex subunit YrbF	0.1			89	1	154.34	E
P80870	BSU31390	yugI	General stress protein 13 (GSP13)	0.1			84	1	50.034	E
P80870	BSU31390	yugI	General stress protein 13 (GSP13)	0.1			6	1	74.849	E
P39608	BSU38060	ywcJ	Uncharacterized transporter YwcJ	1			10	1	71.501	E
P37571	BSU00860	clpC	Negative regulator of genetic competence ClpC/MecB	0.1			219	0.999999	79.511	E
A9LHR4		cpn60	60 kDa chaperonin (Fragment)	0.1			120	0.999999	116.96	E
P09124	BSU33940	gapA	Glyceraldehyde-3-phosphate dehydrogenase 1 (GAPDH) (EC 1.2.1.12) (NAD-dependent glyceraldehyde-3-phosphate dehydrogenase)	0.1			77	0.999999	103.56	E
P28598	BSU06030	groL	60 kDa chaperonin (GroEL protein) (Protein Cpn60) (Stress protein H5)	0.1			210	0.999999	116.96	E
P29727	BSU06360	guaA	GMP synthase [glutamine-hydrolyzing] (EC 6.3.5.2) (GMP synthetase) (Glutamine amidotransferase)	#N/A			305	0.999999	78.674	E
P70965	BSU36760	murAA	UDP-N-acetylglucosamine 1-carboxyvinyltransferase 1 (EC 2.5.1.7) (Enoylpyruvate transferase 1) (UDP-N-acetylglucosamine enolpyruvyl transferase 1) (EPT 1)	0.3			330	0.999999	101.3	E
P16971	BSU16940	recA	Protein RecA (Recombinase A)	0.1			257	0.999999	132.31	E
P14577	BSU01230	rplP	50S ribosomal protein L16	0.1			143	0.999999	110.81	E
P37871	BSU01080	rpoC	DNA-directed RNA polymerase subunit beta' (RNAP subunit beta') (EC 2.7.7.6) (RNA polymerase subunit beta') (Transcriptase subunit beta')	0.1			49	0.999999	75.109	E
P21467	BSU01330	rpsE	30S ribosomal protein S5 (BS5)	0.1			58	0.999999	99.442	E
P54375	BSU25020	sodA	Superoxide dismutase [Mn] (EC 1.15.1.1) (General stress protein 24) (GSP24)	0.1			142	0.999999	70.335	E
P80700	BSU16500	tsf	Elongation factor Ts (EF-Ts)	0.1			281	0.999999	77.894	E
P33166	BSU01130	tuf	Elongation factor Tu (EF-Tu) (P-40)	0.1			205	0.999999	85.576	E
P21881	BSU14580	pdhA	Pyruvate dehydrogenase E1 component subunit alpha (EC 1.2.4.1) (S complex, 42 kDa subunit) (Vegetative protein 220) (VEG220)	0.1			250	0.999998	89.197	E
O31755	BSU16570	proS	Proline--tRNA ligase (EC 6.1.1.15) (Prolyl-tRNA synthetase) (ProRS)	0.2			499	0.999998	101.38	E
P37810	BSU36820	atpG	ATP synthase gamma chain (ATP synthase F1 sector gamma subunit) (F-ATPase gamma subunit)	0.1			287	0.999997	61.52	E
P21464	BSU16490	rpsB	30S ribosomal protein S2 (BS1) (Vegetative protein 209) (VEG209)	0.1			223	0.999997	85.377	E
P80700	BSU16500	tsf	Elongation factor Ts (EF-Ts)	0.1			74	0.999997	83.692	E
P80868	BSU01120	fusA	Elongation factor G (EF-G) (Vegetative protein 19) (VEG19)	0.1			54	0.999996	241.13	E
P42920	BSU01160	rplC	50S ribosomal protein L3 (BL3)	0.1			96	0.999996	133.42	E
P02394	BSU01050	rplL	50S ribosomal protein L7/L12 (BL9) (Vegetative protein 341) (VEG341)	0.1			121	0.999996	71.555	E
O31848	BSU19300	yozC	Uncharacterized protein YozC	0.2			66	0.999996	124.34	E
P49778	BSU24450	efp	Elongation factor P (EF-P)	0.1			14	0.999995	106.26	E
P09124	BSU33940	gapA	Glyceraldehyde-3-phosphate dehydrogenase 1 (GAPDH) (EC 1.2.1.12) (NAD-dependent glyceraldehyde-3-phosphate dehydrogenase)	0.1			91	0.999995	84.289	E
P20277	BSU01440	rplQ	50S ribosomal protein L17 (BL15) (BL21)	0.1			28	0.999995	102.4	E
P42923	BSU01040	rplJ	50S ribosomal protein L10 (BL5) (Cold acclimatization protein) (CAP) (Vegetative protein 300) (VEG300)	0.1			107	0.999994	106.68	E
P37869	BSU33900	eno	Enolase (EC 4.2.1.11) (2-phospho-D-glycerate hydro-lyase) (2-phosphoglycerate dehydratase)	0.1			28	0.999992	144.66	E
C0H3V2	BSU03982	mtlF	Mannitol-specific phosphotransferase enzyme IIA component (EIIA) (EIII) (PTS system mannitol-specific EIIA component)	0.4			70	0.999992	58.92	E
P80866	BSU32710	sufC	Vegetative protein 296 (VEG296)	0.1			93	0.999992	87.511	E
P32081	BSU09100	cspB	Cold shock protein CspB (Major cold shock protein)	0.1			50	0.999988	183.89	E
P80868	BSU01120	fusA	Elongation factor G (EF-G) (Vegetative protein 19) (VEG19)	0.1			42	0.999986	202.95	E
P16263	BSU19360	odhB	Dihydrolipoyllysine-residue succinyltransferase component of 2-oxoglutarate dehydrogenase complex (EC 2.3.1.61) (2-oxoglutarate dehydrogenase complex component E2) (OGDC-E2) (Dihydrolipoamide succinyltransferase component of 2-oxoglutarate dehydrogenase complex)	0.1			416	0.999986	63.091	E
P40409	BSU01630	feuA	Iron-uptake system-binding protein	0.2			235	0.999985	64.04	E
P21471	BSU01150	rpsJ	30S ribosomal protein S10 (BS13)	0.1			23	0.999984	96.492	E
P70965	BSU36760	murAA	UDP-N-acetylglucosamine 1-carboxyvinyltransferase 1 (EC 2.5.1.7) (Enoylpyruvate transferase 1) (UDP-N-acetylglucosamine enolpyruvyl transferase 1) (EPT 1)	0.3			236	0.999982	51.348	E
P39581	BSU38500	dltA	D-alanine--D-alanyl carrier protein ligase (DCL) (EC 6.2.1.54) (D-alanine--poly(phosphoribitol) ligase subunit 1) (D-alanine-activating enzyme) (DAE)	0.3			297	0.999981	63.701	E
P17820	BSU25470	dnaK	Chaperone protein DnaK (HSP70) (Heat shock 70 kDa protein) (Heat shock protein 70)	0.1			508	0.999981	142.89	E
P70965	BSU36760	murAA	UDP-N-acetylglucosamine 1-carboxyvinyltransferase 1 (EC 2.5.1.7) (Enoylpyruvate transferase 1) (UDP-N-acetylglucosamine enolpyruvyl transferase 1) (EPT 1)	0.3			56	0.999981	89.859	E
P38494	BSU22880	ypfD	30S ribosomal protein S1 homolog	0.1			171	0.999981	113.71	E
P80698	BSU28230	tig	Trigger factor (TF) (EC 5.2.1.8) (PPIase) (Vegetative protein 2) (VEG2)	0.1			141	0.999979	148.52	E
P27876	BSU33920	tpiA	Triosephosphate isomerase (TIM) (TPI) (EC 5.3.1.1) (Triose-phosphate isomerase)	0.1			37	0.999979	46.926	E
P34957	BSU38170	qoxA	Quinol oxidase subunit 2 (EC 1.10.3.-) (Oxidase aa(3)-600 subunit 2) (Quinol oxidase aa3-600, subunit QoxA) (Quinol oxidase polypeptide II)	0.1			321	0.999977	128	E
P21465	BSU01220	rpsC	30S ribosomal protein S3 (BS3) (BS2)	0.1			82	0.999976	74.267	E
P21881	BSU14580	pdhA	Pyruvate dehydrogenase E1 component subunit alpha (EC 1.2.4.1) (S complex, 42 kDa subunit) (Vegetative protein 220) (VEG220)	0.1			265	0.999973	82.663	E
P21882	BSU14590	pdhB	Pyruvate dehydrogenase E1 component subunit beta (EC 1.2.4.1) (S complex, 36 kDa subunit)	0.1			252	0.99997	68.257	E
P55872	BSU28870	infC	Translation initiation factor IF-3	0.1			147	0.999968	104.2	E
P37487	BSU40550	ppaC	Manganese-dependent inorganic pyrophosphatase (EC 3.6.1.1) (Pyrophosphate phospho-hydrolase) (PPase)	0.1			309	0.999968	75.695	E
P45872	BSU37010	prfA	Peptide chain release factor 1 (RF-1)	0.2			332	0.999966	60.478	E
P37871	BSU01080	rpoC	DNA-directed RNA polymerase subunit beta' (RNAP subunit beta') (EC 2.7.7.6) (RNA polymerase subunit beta') (Transcriptase subunit beta')	0.1			973	0.999966	109.5	E
P80700	BSU16500	tsf	Elongation factor Ts (EF-Ts)	0.1			116	0.999963	69.522	E
P80239	BSU40090	ahpC	Alkyl hydroperoxide reductase C (EC 1.11.1.26) (General stress protein 22) (Peroxiredoxin) (Thioredoxin peroxidase)	0.1			20	0.999962	61.409	E
Q03223	BSU37070	rpmE	50S ribosomal protein L31	0.1			38	0.999961	75.764	E
O31716	BSU14430	ykpA	Uncharacterized ABC transporter ATP-binding protein YkpA	0.2			98	0.999961	80.438	E
P49787	BSU24340	accC1	Biotin carboxylase 1 (EC 6.3.4.14) (Acetyl-CoA carboxylase subunit A 1) (ACC 1) (EC 6.4.1.2)	0.2			436	0.999958	49.149	E
P37877	BSU29470	ackA	Acetate kinase (EC 2.7.2.1) (Acetokinase)	0.1			301	0.999958	57.401	E
P42924	BSU01180	rplW	50S ribosomal protein L23	0.1			29	0.999952	114.5	E
P08838	BSU13910	ptsI	Phosphoenolpyruvate-protein phosphotransferase (EC 2.7.3.9) (Phosphotransferase system, enzyme I)	0.1			39	0.999951	133.89	E
O07565	BSU10540	ntdB	Kanosamine-6-phosphate phosphatase (EC 3.1.3.92)	0.7			125	0.999949	57.047	E
P07343	BSU33040	fumC	Fumarate hydratase class II (Fumarase C) (EC 4.2.1.2) (Aerobic fumarase) (Iron-independent fumarase)	0.1			306	0.999947	70.26	E
P0CI73	BSU01780	glmS	Glutamine--fructose-6-phosphate aminotransferase [isomerizing] (EC 2.6.1.16) (D-fructose-6-phosphate amidotransferase) (GFAT) (Glucosamine-6-phosphate synthase) (Hexosephosphate aminotransferase) (L-glutamine--D-fructose-6-phosphate amidotransferase)	0.2			237	0.999944	103.91	E
P07343	BSU33040	fumC	Fumarate hydratase class II (Fumarase C) (EC 4.2.1.2) (Aerobic fumarase) (Iron-independent fumarase)	0.1			198	0.999943	80.102	E
P37477	BSU00820	lysS	Lysine--tRNA ligase (EC 6.1.1.6) (Lysyl-tRNA synthetase) (LysRS)	0.2			417	0.999938	61.962	E
P20429	BSU01430	rpoA	DNA-directed RNA polymerase subunit alpha (RNAP subunit alpha) (EC 2.7.7.6) (RNA polymerase subunit alpha) (Transcriptase subunit alpha)	0.1			10	0.99993	62.694	E
P20166	BSU13890	ptsG	PTS system glucose-specific EIICBA component (EC 2.7.1.199) (EII-Glc/EIII-Glc) (EIICBA-Glc) (EIICBA-Glc 1) [Includes: Glucose permease IIC component (PTS system glucose-specific EIIC component); Glucose-specific phosphotransferase enzyme IIB component (PTS system glucose-specific EIIB component); Glucose-specific phosphotransferase enzyme IIA component (PTS system glucose-specific EIIA component)]	0.1			444	0.999925	103.26	E
P54466	BSU25380	yqfA	UPF0365 protein YqfA	0.1			108	0.999917	55.084	E
Q06796	BSU01020	rplK	50S ribosomal protein L11 (BL11)	0.1			86	0.999916	74.841	E
P21880	BSU14610	pdhD	Dihydrolipoyl dehydrogenase (EC 1.8.1.4) (Dihydrolipoamide dehydrogenase) (E3 component of pyruvate complex) (S complex, 50 kDa subunit)	0.1			318	0.999915	94.463	E
P37877	BSU29470	ackA	Acetate kinase (EC 2.7.2.1) (Acetokinase)	0.1			53	0.999903	93.106	E
P42924	BSU01180	rplW	50S ribosomal protein L23	0.1			23	0.999887	59.8	E
P40924	BSU33930	pgk	Phosphoglycerate kinase (EC 2.7.2.3)	0.1			172	0.999885	43.696	E
P71012	BSU14400	fruA	PTS system fructose-specific EIIABC component (EIIABC-Fru) [Includes: PTS system fructose-specific EIIA component (EII-Fru) (Fructose-specific phosphotransferase enzyme IIA component); PTS system fructose-specific EIIB component (EC 2.7.1.202) (EIII-Fru) (Fructose-specific phosphotransferase enzyme IIB component); PTS system fructose-specific EIIC component (Fructose permease IIC component)]	0.2			61	0.999873	56.54	E
P37869	BSU33900	eno	Enolase (EC 4.2.1.11) (2-phospho-D-glycerate hydro-lyase) (2-phosphoglycerate dehydratase)	0.1			415	0.999869	88.627	E
P10725	BSU04640	alr1	Alanine racemase 1 (EC 5.1.1.1)	0.4			273	0.999863	63.827	E
P21474	BSU15990	rpsP	30S ribosomal protein S16 (BS17)	0.1			35	0.999858	40.085	E
P32081	BSU09100	cspB	Cold shock protein CspB (Major cold shock protein)	0.1			19	0.999855	114.35	E
P08838	BSU13910	ptsI	Phosphoenolpyruvate-protein phosphotransferase (EC 2.7.3.9) (Phosphotransferase system, enzyme I)	0.1			101	0.999842	72.891	E
P21465	BSU01220	rpsC	30S ribosomal protein S3 (BS3) (BS2)	0.1			169	0.999841	87.647	E
P96613	BSU04570	murF	UDP-N-acetylmuramoyl-tripeptide--D-alanyl-D-alanine ligase (EC 6.3.2.10) (D-alanyl-D-alanine-adding enzyme) (UDP-MurNAc-pentapeptide synthetase)	0.3			172	0.999832	59.597	E
P21880	BSU14610	pdhD	Dihydrolipoyl dehydrogenase (EC 1.8.1.4) (Dihydrolipoamide dehydrogenase) (E3 component of pyruvate complex) (S complex, 50 kDa subunit)	0.1			394	0.999827	150.04	E
P04831	BSU29570	sspA	Small, acid-soluble spore protein A (SASP)	0.3			27	0.999821	90.654	E
P04832	BSU09750	sspB	Small, acid-soluble spore protein B (SASP)	0.3			25	0.999821	90.654	E
P80866	BSU32710	sufC	Vegetative protein 296 (VEG296)	0.1			16	0.999821	109.79	E
P29727	BSU06360	guaA	GMP synthase [glutamine-hydrolyzing] (EC 6.3.5.2) (GMP synthetase) (Glutamine amidotransferase)	#N/A			403	0.999811	72.321	E
P09124	BSU33940	gapA	Glyceraldehyde-3-phosphate dehydrogenase 1 (GAPDH) (EC 1.2.1.12) (NAD-dependent glyceraldehyde-3-phosphate dehydrogenase)	0.1			316	0.999807	155.08	E
P12874	BSU01250	rpsQ	30S ribosomal protein S17 (BS16)	0.1			79	0.999799	89.298	E
Q45495	BSU14560	defB	Peptide deformylase 2 (PDF 2) (EC 3.5.1.88) (Polypeptide deformylase 2)	0.1			108	0.999796	105.03	E
P39795	BSU07810	treA	Trehalose-6-phosphate hydrolase (EC 3.2.1.93) (Alpha,alpha-phosphotrehalase) (Phospho-alpha-(1-1)-glucosidase)	0.3			530	0.99978	42.095	E
P32081	BSU09100	cspB	Cold shock protein CspB (Major cold shock protein)	0.1			42	0.999779	192.65	E
P80698	BSU28230	tig	Trigger factor (TF) (EC 5.2.1.8) (PPIase) (Vegetative protein 2) (VEG2)	0.1			298	0.999758	125.28	E
P71037	BSU36620	ywnB	Uncharacterized protein YwnB	0.4			213	0.999702	95.62	E
P80239	BSU40090	ahpC	Alkyl hydroperoxide reductase C (EC 1.11.1.26) (General stress protein 22) (Peroxiredoxin) (Thioredoxin peroxidase)	0.1			135	0.999698	69.259	E
P39772	BSU22360	asnS	Asparagine--tRNA ligase (EC 6.1.1.22) (Asparaginyl-tRNA synthetase) (AsnRS)	0.1			142	0.999689	57.567	E
P80698	BSU28230	tig	Trigger factor (TF) (EC 5.2.1.8) (PPIase) (Vegetative protein 2) (VEG2)	0.1			61	0.999686	79.467	E
P12013	BSU40080	gntZ	6-phosphogluconate dehydrogenase, NAD(+)-dependent, decarboxylating (EC 1.1.1.343)	0.3			468	0.999649	40.552	E
P70965	BSU36760	murAA	UDP-N-acetylglucosamine 1-carboxyvinyltransferase 1 (EC 2.5.1.7) (Enoylpyruvate transferase 1) (UDP-N-acetylglucosamine enolpyruvyl transferase 1) (EPT 1)	0.3			137	0.999635	58.37	E
P21464	BSU16490	rpsB	30S ribosomal protein S2 (BS1) (Vegetative protein 209) (VEG209)	0.1			122	0.999633	53.448	E
P80698	BSU28230	tig	Trigger factor (TF) (EC 5.2.1.8) (PPIase) (Vegetative protein 2) (VEG2)	0.1			422	0.999616	49.418	E
P17631	BSU25460	dnaJ	Chaperone protein DnaJ	#N/A			262	0.999591	75.38	E
P71017	BSU31050	gbsB	Choline dehydrogenase (EC 1.1.1.-) (Alcohol dehydrogenase)	0.5			158	0.999583	47.099	E
O32165	BSU32700	sufD	FeS cluster assembly protein SufD	0.1			131	0.999569	71.379	E
P21882	BSU14590	pdhB	Pyruvate dehydrogenase E1 component subunit beta (EC 1.2.4.1) (S complex, 36 kDa subunit)	0.1			183	0.999499	81.703	E
P54419	BSU30550	metK	S-adenosylmethionine synthase (AdoMet synthase) (EC 2.5.1.6) (MAT) (Methionine adenosyltransferase)	0.1			185	0.999482	103.3	E
P54452	BSU25680	yqeG	Uncharacterized protein YqeG	0.2			172	0.99946	84.359	E
P42921	BSU01170	rplD	50S ribosomal protein L4	0.1			177	0.999423	58.457	E
P80861	BSU12290	yjlD	NADH dehydrogenase-like protein YjlD (EC 1.6.99.-) (Glucose starvation-inducible protein 5) (GSI5)	0.1			79	0.999413	40.066	E
P80700	BSU16500	tsf	Elongation factor Ts (EF-Ts)	0.1			205	0.999391	113.24	E
P33166	BSU01130	tuf	Elongation factor Tu (EF-Tu) (P-40)	0.1			161	0.999387	116.24	E
P27876	BSU33920	tpiA	Triosephosphate isomerase (TIM) (TPI) (EC 5.3.1.1) (Triose-phosphate isomerase)	0.1			104	0.999378	80.318	E
P42920	BSU01160	rplC	50S ribosomal protein L3 (BL3)	0.1			106	0.999365	78.661	E
P49787	BSU24340	accC1	Biotin carboxylase 1 (EC 6.3.4.14) (Acetyl-CoA carboxylase subunit A 1) (ACC 1) (EC 6.4.1.2)	0.2			428	0.999277	103.39	E
P12425	BSU17460	glnA	Glutamine synthetase (GS) (EC 6.3.1.2) (Glutamate--ammonia ligase) (Glutamine synthetase I alpha) (GSI alpha)	0.1			382	0.999263	79.635	E
P32727	BSU16600	nusA	Transcription termination/antitermination protein NusA	0.1			4	0.999263	43.03	E
P33166	BSU01130	tuf	Elongation factor Tu (EF-Tu) (P-40)	0.1			245	0.99925	134.88	E
O34499	BSU13010	pgl	6-phosphogluconolactonase (EC 3.1.1.31)	0.1			320	0.999248	48.097	E
P37871	BSU01080	rpoC	DNA-directed RNA polymerase subunit beta' (RNAP subunit beta') (EC 2.7.7.6) (RNA polymerase subunit beta') (Transcriptase subunit beta')	0.1			1129	0.999241	140.16	E
P37870	BSU01070	rpoB	DNA-directed RNA polymerase subunit beta (RNAP subunit beta) (EC 2.7.7.6) (RNA polymerase subunit beta) (Transcriptase subunit beta)	0.1			171	0.999215	133.13	E
P20166	BSU13890	ptsG	PTS system glucose-specific EIICBA component (EC 2.7.1.199) (EII-Glc/EIII-Glc) (EIICBA-Glc) (EIICBA-Glc 1) [Includes: Glucose permease IIC component (PTS system glucose-specific EIIC component); Glucose-specific phosphotransferase enzyme IIB component (PTS system glucose-specific EIIB component); Glucose-specific phosphotransferase enzyme IIA component (PTS system glucose-specific EIIA component)]	0.1			586	0.999094	51.166	E
P80868	BSU01120	fusA	Elongation factor G (EF-G) (Vegetative protein 19) (VEG19)	0.1			231	0.999091	96.464	E
P21471	BSU01150	rpsJ	30S ribosomal protein S10 (BS13)	0.1			99	0.999002	112.83	E
P17820	BSU25470	dnaK	Chaperone protein DnaK (HSP70) (Heat shock 70 kDa protein) (Heat shock protein 70)	0.1			213	0.998987	109.89	E
P80239	BSU40090	ahpC	Alkyl hydroperoxide reductase C (EC 1.11.1.26) (General stress protein 22) (Peroxiredoxin) (Thioredoxin peroxidase)	0.1			87	0.998952	57.047	E
P21880	BSU14610	pdhD	Dihydrolipoyl dehydrogenase (EC 1.8.1.4) (Dihydrolipoamide dehydrogenase) (E3 component of pyruvate complex) (S complex, 50 kDa subunit)	0.1			285	0.998947	113.17	E
P46898	BSU01310	rplF	50S ribosomal protein L6 (BL10)	0.1			10	0.998902	110.6	E
O32038	BSU27550	aspS	Aspartate--tRNA(Asp/Asn) ligase (EC 6.1.1.23) (Aspartyl-tRNA synthetase) (AspRS) (Non-discriminating aspartyl-tRNA synthetase) (ND-AspRS)	0.1			569	0.998843	69.952	E
P19946	BSU01350	rplO	50S ribosomal protein L15	0.1			98	0.998689	99.11	E
P37809	BSU36810	atpD	ATP synthase subunit beta (EC 7.1.2.2) (ATP synthase F1 sector subunit beta) (F-ATPase subunit beta) (Vegetative protein 31) (VEG31)	0.1			357	0.998667	77.746	E
P28821	BSU00760	pabC	Aminodeoxychorismate lyase (EC 4.1.3.38) (4-amino-4-deoxychorismate lyase) (ADC lyase) (ADCL)	0.7			276	0.998456	41.876	E
P39646	BSU37660	pta	Phosphate acetyltransferase (EC 2.3.1.8) (Phosphotransacetylase) (Vegetative protein 43) (VEG43)	0.1			95	0.998449	63.287	E
P33166	BSU01130	tuf	Elongation factor Tu (EF-Tu) (P-40)	0.1			149	0.998366	87.388	E
P51777	BSU21930	cspD	Cold shock protein CspD	0.1			50	0.998347	112.67	E
P39581	BSU38500	dltA	D-alanine--D-alanyl carrier protein ligase (DCL) (EC 6.2.1.54) (D-alanine--poly(phosphoribitol) ligase subunit 1) (D-alanine-activating enzyme) (DAE)	0.3			414	0.998273	114.86	E
P20429	BSU01430	rpoA	DNA-directed RNA polymerase subunit alpha (RNAP subunit alpha) (EC 2.7.7.6) (RNA polymerase subunit alpha) (Transcriptase subunit alpha)	0.1			13	0.998256	77.533	E
P28366	BSU35300	secA	Protein translocase subunit SecA	0.2			348	0.998238	89.011	E
P51777	BSU21930	cspD	Cold shock protein CspD	0.1			19	0.998176	128.52	E
Q03522	BSU15200	murD	UDP-N-acetylmuramoylalanine--D-glutamate ligase (EC 6.3.2.9) (D-glutamic acid-adding enzyme) (UDP-N-acetylmuramoyl-L-alanyl-D-glutamate synthetase)	0.2			2	0.998119	56.916	E
P08838	BSU13910	ptsI	Phosphoenolpyruvate-protein phosphotransferase (EC 2.7.3.9) (Phosphotransferase system, enzyme I)	0.1			290	0.997957	53.001	E
P17865	BSU15290	ftsZ	Cell division protein FtsZ	0.1			3	0.997955	61.732	E
P37808	BSU36830	atpA	ATP synthase subunit alpha (EC 7.1.2.2) (ATP synthase F1 sector subunit alpha) (F-ATPase subunit alpha) (Vegetative protein 100) (VEG100)	0.1			96	0.997781	78.324	E
P94356	BSU38850	yxkC	Uncharacterized protein YxkC	0.1			156	0.997757	102.05	E
O30509	BSU06690	gatB	Aspartyl/glutamyl-tRNA(Asn/Gln) amidotransferase subunit B (Asp/Glu-ADT subunit B) (EC 6.3.5.-)	0.1			69	0.997673	41.86	E
P28599	BSU06020	groS	10 kDa chaperonin (GroES protein) (Protein Cpn10)	0.1			15	0.99765	128.86	E
Q06796	BSU01020	rplK	50S ribosomal protein L11 (BL11)	0.1			91	0.997587	49.632	E
P09124	BSU33940	gapA	Glyceraldehyde-3-phosphate dehydrogenase 1 (GAPDH) (EC 1.2.1.12) (NAD-dependent glyceraldehyde-3-phosphate dehydrogenase)	0.1			26	0.997568	202.25	E
P96614	BSU04580	cshA	DEAD-box ATP-dependent RNA helicase CshA (EC 3.6.4.13)	0.1			426	0.997475	66.267	E
P37869	BSU33900	eno	Enolase (EC 4.2.1.11) (2-phospho-D-glycerate hydro-lyase) (2-phosphoglycerate dehydratase)	0.1			287	0.997429	149.52	E
P20429	BSU01430	rpoA	DNA-directed RNA polymerase subunit alpha (RNAP subunit alpha) (EC 2.7.7.6) (RNA polymerase subunit alpha) (Transcriptase subunit alpha)	0.1			255	0.997377	191.04	E
P21882	BSU14590	pdhB	Pyruvate dehydrogenase E1 component subunit beta (EC 1.2.4.1) (S complex, 36 kDa subunit)	0.1			192	0.997184	68.567	E
P80865	BSU16100	sucD	Succinate--CoA ligase [ADP-forming] subunit alpha (EC 6.2.1.5) (Succinyl-CoA synthetase subunit alpha) (SCS-alpha)	0.1			209	0.996981	59.211	E
Q06795	BSU01010	nusG	Transcription termination/antitermination protein NusG	0.1			125	0.996877	68.847	E
Q06797	BSU01030	rplA	50S ribosomal protein L1 (BL1)	0.1			150	0.996841	86.67	E
O32263	BSU34650	yvdC	Uncharacterized protein YvdC	0.3			7	0.996777	71.949	E
O32039	BSU27560	hisS	Histidine--tRNA ligase (EC 6.1.1.21) (Histidyl-tRNA synthetase) (HisRS)	0.2			275	0.996678	67.14	E
P33166	BSU01130	tuf	Elongation factor Tu (EF-Tu) (P-40)	0.1			272	0.996676	113.59	E
P37869	BSU33900	eno	Enolase (EC 4.2.1.11) (2-phospho-D-glycerate hydro-lyase) (2-phosphoglycerate dehydratase)	0.1			348	0.99667	86.479	E
P42923	BSU01040	rplJ	50S ribosomal protein L10 (BL5) (Cold acclimatization protein) (CAP) (Vegetative protein 300) (VEG300)	0.1			159	0.996461	91.867	E
P49778	BSU24450	efp	Elongation factor P (EF-P)	0.1			168	0.996277	145.77	E
P33166	BSU01130	tuf	Elongation factor Tu (EF-Tu) (P-40)	0.1			70	0.996265	141.97	E
O32259	BSU34030	lutC	Lactate utilization protein C	0.1			65	0.996176	62.765	E
P37877	BSU29470	ackA	Acetate kinase (EC 2.7.2.1) (Acetokinase)	0.1			20	0.99589	46.319	E
P54531	BSU24080	yqiT	Leucine dehydrogenase (LeuDH) (EC 1.4.1.9)	0.2			13	0.995874	119.92	E
P21880	BSU14610	pdhD	Dihydrolipoyl dehydrogenase (EC 1.8.1.4) (Dihydrolipoamide dehydrogenase) (E3 component of pyruvate complex) (S complex, 50 kDa subunit)	0.1			79	0.995812	47.082	E
P80868	BSU01120	fusA	Elongation factor G (EF-G) (Vegetative protein 19) (VEG19)	0.1			431	0.995596	163.2	E
P21470	BSU01500	rpsI	30S ribosomal protein S9 (BS10)	0.1			89	0.995399	87.639	E
P80868	BSU01120	fusA	Elongation factor G (EF-G) (Vegetative protein 19) (VEG19)	0.1			683	0.995364	120.46	E
P14577	BSU01230	rplP	50S ribosomal protein L16	0.1			112	0.995251	99.941	E
Q06796	BSU01020	rplK	50S ribosomal protein L11 (BL11)	0.1			122	0.995197	97.297	E
P21883	BSU14600	pdhC	Dihydrolipoyllysine-residue acetyltransferase component of pyruvate dehydrogenase complex (EC 2.3.1.12) (Dihydrolipoamide acetyltransferase component of pyruvate dehydrogenase complex) (E2) (S complex, 48 kDa subunit)	0.1			12	0.995118	94.461	E
P37809	BSU36810	atpD	ATP synthase subunit beta (EC 7.1.2.2) (ATP synthase F1 sector subunit beta) (F-ATPase subunit beta) (Vegetative protein 31) (VEG31)	0.1			131	0.995029	75.358	E
P49778	BSU24450	efp	Elongation factor P (EF-P)	0.1			135	0.994959	71.309	E
P40778	BSU29790	murC	UDP-N-acetylmuramate--L-alanine ligase (EC 6.3.2.8) (UDP-N-acetylmuramoyl-L-alanine synthetase)	0.3			397	0.994836	80.755	E
P40924	BSU33930	pgk	Phosphoglycerate kinase (EC 2.7.2.3)	0.1			285	0.994792	59.372	E
P21466	BSU29660	rpsD	30S ribosomal protein S4 (BS4)	0.1			191	0.994758	98.942	E
O32119	BSU32220	yutI	Putative nitrogen fixation protein YutI	0.1			108	0.994731	52.527	E
P18157	BSU09290	glpK	Glycerol kinase (EC 2.7.1.30) (ATP:glycerol 3-phosphotransferase) (Glycerokinase) (GK)	0.3			329	0.994692	78.615	E
P21469	BSU01110	rpsG	30S ribosomal protein S7 (BS7)	0.1			63	0.994571	74.29	E
O32223	BSU33530	iolW	scyllo-inositol 2-dehydrogenase (NADP(+)) IolW (EC 1.1.1.371) (NADP(+)-dependent scyllo-inositol dehydrogenase 1) (NADP(+)-dependent SI dehydrogenase 1)	0.2			346	0.994502	42.336	E
P32081	BSU09100	cspB	Cold shock protein CspB (Major cold shock protein)	0.1			43	0.99418	204.13	E
P38494	BSU22880	ypfD	30S ribosomal protein S1 homolog	0.1			75	0.994179	128.27	E
Q06796	BSU01020	rplK	50S ribosomal protein L11 (BL11)	0.1			57	0.994156	54.668	E
Q06797	BSU01030	rplA	50S ribosomal protein L1 (BL1)	0.1			123	0.994017	85.248	E
P37871	BSU01080	rpoC	DNA-directed RNA polymerase subunit beta' (RNAP subunit beta') (EC 2.7.7.6) (RNA polymerase subunit beta') (Transcriptase subunit beta')	0.1			990	0.993874	101.01	E
P37455	BSU40900	ssbA	Single-stranded DNA-binding protein A (SSB A)	0.1			94	0.993852	67.299	E
A9LHR4		cpn60	60 kDa chaperonin (Fragment)	0.1			94	0.993834	66.673	E
P28598	BSU06030	groL	60 kDa chaperonin (GroEL protein) (Protein Cpn60) (Stress protein H5)	0.1			184	0.993834	66.673	E
P39795	BSU07810	treA	Trehalose-6-phosphate hydrolase (EC 3.2.1.93) (Alpha,alpha-phosphotrehalase) (Phospho-alpha-(1-1)-glucosidase)	0.3			450	0.993655	60.91	E
P08838	BSU13910	ptsI	Phosphoenolpyruvate-protein phosphotransferase (EC 2.7.3.9) (Phosphotransferase system, enzyme I)	0.1			22	0.993562	55.401	E
Q06797	BSU01030	rplA	50S ribosomal protein L1 (BL1)	0.1			148	0.993536	88.056	E
P80868	BSU01120	fusA	Elongation factor G (EF-G) (Vegetative protein 19) (VEG19)	0.1			398	0.993245	75.534	E
P21881	BSU14580	pdhA	Pyruvate dehydrogenase E1 component subunit alpha (EC 1.2.4.1) (S complex, 42 kDa subunit) (Vegetative protein 220) (VEG220)	0.1			359	0.993096	110.35	E
P42923	BSU01040	rplJ	50S ribosomal protein L10 (BL5) (Cold acclimatization protein) (CAP) (Vegetative protein 300) (VEG300)	0.1			121	0.99269	62.582	E
P21466	BSU29660	rpsD	30S ribosomal protein S4 (BS4)	0.1			163	0.99227	93.111	E
P18579	BSU15230	murB	UDP-N-acetylenolpyruvoylglucosamine reductase (EC 1.3.1.98) (UDP-N-acetylmuramate dehydrogenase)	0.2			95	0.992256	56.72	E
P02394	BSU01050	rplL	50S ribosomal protein L7/L12 (BL9) (Vegetative protein 341) (VEG341)	0.1			114	0.992126	87.258	E
P46898	BSU01310	rplF	50S ribosomal protein L6 (BL10)	0.1			61	0.992026	44.377	E
P21883	BSU14600	pdhC	Dihydrolipoyllysine-residue acetyltransferase component of pyruvate dehydrogenase complex (EC 2.3.1.12) (Dihydrolipoamide acetyltransferase component of pyruvate dehydrogenase complex) (E2) (S complex, 48 kDa subunit)	0.1			133	0.991978	124.5	E
P80700	BSU16500	tsf	Elongation factor Ts (EF-Ts)	0.1			199	0.991659	117.2	E
Q06797	BSU01030	rplA	50S ribosomal protein L1 (BL1)	0.1			25	0.991513	98.249	E
P54375	BSU25020	sodA	Superoxide dismutase [Mn] (EC 1.15.1.1) (General stress protein 24) (GSP24)	0.1			66	0.991357	62.104	E
P37809	BSU36810	atpD	ATP synthase subunit beta (EC 7.1.2.2) (ATP synthase F1 sector subunit beta) (F-ATPase subunit beta) (Vegetative protein 31) (VEG31)	0.1			75	0.991162	78.324	E
A9LHR4		cpn60	60 kDa chaperonin (Fragment)	0.1			96	0.991061	92.773	E
P28598	BSU06030	groL	60 kDa chaperonin (GroEL protein) (Protein Cpn60) (Stress protein H5)	0.1			186	0.991061	92.773	E
P46354	BSU23490	punA	Purine nucleoside phosphorylase 1 (PNP 1) (EC 2.4.2.1) (Inosine phosphorylase) (Inosine-guanosine phosphorylase) (Purine nucleoside phosphorylase I) (PNP I) (Pu-NPase I)	0.1			195	0.990658	78.501	E
P51777	BSU21930	cspD	Cold shock protein CspD	0.1			42	0.990146	97.542	E
P09124	BSU33940	gapA	Glyceraldehyde-3-phosphate dehydrogenase 1 (GAPDH) (EC 1.2.1.12) (NAD-dependent glyceraldehyde-3-phosphate dehydrogenase)	0.1			251	0.990054	76.611	E
O32028	BSU27270	mtnN	5'-methylthioadenosine/S-adenosylhomocysteine nucleosidase (MTA/SAH nucleosidase) (MTAN) (EC 3.2.2.9) (5'-deoxyadenosine nucleosidase) (DOA nucleosidase) (dAdo nucleosidase) (5'-methylthioadenosine nucleosidase) (MTA nucleosidase) (S-adenosylhomocysteine nucleosidase) (AdoHcy nucleosidase) (SAH nucleosidase) (SRH nucleosidase)	0.2			135	0.990025	87.429	E
P27876	BSU33920	tpiA	Triosephosphate isomerase (TIM) (TPI) (EC 5.3.1.1) (Triose-phosphate isomerase)	0.1			129	0.989311	88.561	E
P70965	BSU36760	murAA	UDP-N-acetylglucosamine 1-carboxyvinyltransferase 1 (EC 2.5.1.7) (Enoylpyruvate transferase 1) (UDP-N-acetylglucosamine enolpyruvyl transferase 1) (EPT 1)	0.3			415	0.989061	81.865	E
P37871	BSU01080	rpoC	DNA-directed RNA polymerase subunit beta' (RNAP subunit beta') (EC 2.7.7.6) (RNA polymerase subunit beta') (Transcriptase subunit beta')	0.1			998	0.989034	59.345	E
P17820	BSU25470	dnaK	Chaperone protein DnaK (HSP70) (Heat shock 70 kDa protein) (Heat shock protein 70)	0.1			140	0.988975	60.973	E
P14193	BSU00510	prs	Ribose-phosphate pyrophosphokinase (RPPK) (EC 2.7.6.1) (5-phospho-D-ribosyl alpha-1-diphosphate) (Phosphoribosyl diphosphate synthase) (Phosphoribosyl pyrophosphate synthase) (P-Rib-PP synthase) (PPRibP synthase) (PRPP synthase) (PRPPase)	0.1			167	0.988592	112.01	E
P38494	BSU22880	ypfD	30S ribosomal protein S1 homolog	0.1			34	0.98858	84.173	E
O34588	BSU14100	ykuJ	Uncharacterized protein YkuJ	0.1			16	0.988539	48.053	E
P80885	BSU29180	pyk	Pyruvate kinase (PK) (EC 2.7.1.40) (Vegetative protein 17) (VEG17)	0.1			235	0.988529	105.72	E
P29727	BSU06360	guaA	GMP synthase [glutamine-hydrolyzing] (EC 6.3.5.2) (GMP synthetase) (Glutamine amidotransferase)	#N/A			482	0.988395	52.576	E
P12879	BSU01300	rpsH	30S ribosomal protein S8 (BS8)	0.1			50	0.988271	95.741	E
P33166	BSU01130	tuf	Elongation factor Tu (EF-Tu) (P-40)	0.1			187	0.98799	86.313	E
P80868	BSU01120	fusA	Elongation factor G (EF-G) (Vegetative protein 19) (VEG19)	0.1			91	0.987518	152.04	E
O32161	BSU32660	yurT	Uncharacterized protein YurT	0.2			30	0.9868	47.823	E
P80868	BSU01120	fusA	Elongation factor G (EF-G) (Vegetative protein 19) (VEG19)	0.1			454	0.986793	77.63	E
P17820	BSU25470	dnaK	Chaperone protein DnaK (HSP70) (Heat shock 70 kDa protein) (Heat shock protein 70)	0.1			124	0.98676	81.904	E
P80868	BSU01120	fusA	Elongation factor G (EF-G) (Vegetative protein 19) (VEG19)	0.1			93	0.986728	130.36	E
P42919	BSU01190	rplB	50S ribosomal protein L2 (BL2)	0.1			115	0.986679	40.844	E
P37437	BSU40500	rplI	50S ribosomal protein L9 (BL17)	0.1			61	0.986611	72.243	E
P09124	BSU33940	gapA	Glyceraldehyde-3-phosphate dehydrogenase 1 (GAPDH) (EC 1.2.1.12) (NAD-dependent glyceraldehyde-3-phosphate dehydrogenase)	0.1			28	0.986382	133.25	E
P07343	BSU33040	fumC	Fumarate hydratase class II (Fumarase C) (EC 4.2.1.2) (Aerobic fumarase) (Iron-independent fumarase)	0.1			107	0.986251	42.59	E
P80868	BSU01120	fusA	Elongation factor G (EF-G) (Vegetative protein 19) (VEG19)	0.1			511	0.986013	131.5	E
P21465	BSU01220	rpsC	30S ribosomal protein S3 (BS3) (BS2)	0.1			187	0.985865	107.98	E
P39148	BSU36900	glyA	Serine hydroxymethyltransferase (SHMT) (Serine methylase) (EC 2.1.2.1)	0.1			41	0.98567	69.435	E
P37871	BSU01080	rpoC	DNA-directed RNA polymerase subunit beta' (RNAP subunit beta') (EC 2.7.7.6) (RNA polymerase subunit beta') (Transcriptase subunit beta')	0.1			396	0.98563	41.378	E
P21881	BSU14580	pdhA	Pyruvate dehydrogenase E1 component subunit alpha (EC 1.2.4.1) (S complex, 42 kDa subunit) (Vegetative protein 220) (VEG220)	0.1			327	0.985256	121.26	E
P37870	BSU01070	rpoB	DNA-directed RNA polymerase subunit beta (RNAP subunit beta) (EC 2.7.7.6) (RNA polymerase subunit beta) (Transcriptase subunit beta)	0.1			305	0.984851	44.567	E
P37871	BSU01080	rpoC	DNA-directed RNA polymerase subunit beta' (RNAP subunit beta') (EC 2.7.7.6) (RNA polymerase subunit beta') (Transcriptase subunit beta')	0.1			573	0.984711	63.302	E
P08877	BSU13900	ptsH	Phosphocarrier protein HPr (Histidine-containing protein)	0.1			88	0.98428	83.088	E
P54375	BSU25020	sodA	Superoxide dismutase [Mn] (EC 1.15.1.1) (General stress protein 24) (GSP24)	0.1			56	0.984238	156	E
P21465	BSU01220	rpsC	30S ribosomal protein S3 (BS3) (BS2)	0.1			214	0.983814	60.436	E
P80868	BSU01120	fusA	Elongation factor G (EF-G) (Vegetative protein 19) (VEG19)	0.1			607	0.983551	47.808	E
P20429	BSU01430	rpoA	DNA-directed RNA polymerase subunit alpha (RNAP subunit alpha) (EC 2.7.7.6) (RNA polymerase subunit alpha) (Transcriptase subunit alpha)	0.1			93	0.983402	118.69	E
P33166	BSU01130	tuf	Elongation factor Tu (EF-Tu) (P-40)	0.1			181	0.983343	111.61	E
P37870	BSU01070	rpoB	DNA-directed RNA polymerase subunit beta (RNAP subunit beta) (EC 2.7.7.6) (RNA polymerase subunit beta) (Transcriptase subunit beta)	0.1			858	0.983307	130.41	E
A3F3D6		ndk	Nucleoside diphosphate kinase (NDK) (NDP kinase) (EC 2.7.4.6) (Nucleoside-2-P kinase)	0.1			125	0.982859	71.98	E
P31103	BSU22730	ndk	Nucleoside diphosphate kinase (NDK) (NDP kinase) (EC 2.7.4.6) (Nucleoside-2-P kinase)	0.1			125	0.982859	71.98	E
P50727	BSU23040	fer	Ferredoxin	0.1			82	0.982316	65.212	E
A9LHR4		cpn60	60 kDa chaperonin (Fragment)	0.1			75	0.982042	83.992	E
P28598	BSU06030	groL	60 kDa chaperonin (GroEL protein) (Protein Cpn60) (Stress protein H5)	0.1			165	0.982042	83.992	E
P42923	BSU01040	rplJ	50S ribosomal protein L10 (BL5) (Cold acclimatization protein) (CAP) (Vegetative protein 300) (VEG300)	0.1			37	0.982015	52.576	E
P21879	BSU00090	guaB	Inosine-5'-monophosphate dehydrogenase (IMP dehydrogenase) (IMPD) (IMPDH) (EC 1.1.1.205) (Superoxide-inducible protein 12) (SOI12)	0.1			35	0.981866	45.598	E
P39751	BSU36410	mbl	Cell shape-determining protein Mbl (Actin-like Mbl protein) (Rod shape-determining protein Mbl)	0.1			77	0.981782	43.813	E
P25812	BSU41010	mnmG	tRNA uridine 5-carboxymethylaminomethyl modification enzyme MnmG (Glucose-inhibited division protein A)	0.2			344	0.981308	66.76	E
P42919	BSU01190	rplB	50S ribosomal protein L2 (BL2)	0.1			23	0.980453	80.738	E
P37477	BSU00820	lysS	Lysine--tRNA ligase (EC 6.1.1.6) (Lysyl-tRNA synthetase) (LysRS)	0.2			424	0.980301	45.587	E
P50829	BSU22230	ypqE	Putative phosphotransferase enzyme IIA component YpqE (Putative PTS system EIIA component)	0.2			51	0.979902	110.01	E
O32090	BSU31750	pncB	Nicotinate phosphoribosyltransferase (NAPRTase) (EC 6.3.4.21)	0.2			339	0.979597	100.02	E
P51831	BSU15910	fabG	3-oxoacyl-[acyl-carrier-protein] reductase FabG (EC 1.1.1.100) (3-ketoacyl-acyl carrier protein reductase) (Beta-Ketoacyl-acyl carrier protein reductase) (Beta-ketoacyl-ACP reductase)	0.1			214	0.979148	81.967	E
P39773	BSU33910	gpmI	2,3-bisphosphoglycerate-independent phosphoglycerate mutase (BPG-independent PGAM) (Phosphoglyceromutase) (iPGM) (EC 5.4.2.12) (Vegetative protein 107) (VEG107)	0.1			427	0.97909	74.987	E
P46898	BSU01310	rplF	50S ribosomal protein L6 (BL10)	0.1			47	0.979079	63.408	E
P51833	BSU15930	rnc	Ribonuclease 3 (EC 3.1.26.3) (Ribonuclease III) (RNase III)	0.2			99	0.979048	47.487	E
P54519	BSU24330	yqhY	Uncharacterized protein YqhY	0.2			134	0.978996	57.836	E
P39581	BSU38500	dltA	D-alanine--D-alanyl carrier protein ligase (DCL) (EC 6.2.1.54) (D-alanine--poly(phosphoribitol) ligase subunit 1) (D-alanine-activating enzyme) (DAE)	0.3			144	0.978659	139.08	E
P37869	BSU33900	eno	Enolase (EC 4.2.1.11) (2-phospho-D-glycerate hydro-lyase) (2-phosphoglycerate dehydratase)	0.1			371	0.978165	230.05	E
P37812	BSU36800	atpC	ATP synthase epsilon chain (ATP synthase F1 sector epsilon subunit) (F-ATPase epsilon subunit)	0.1			21	0.978045	96.131	E
O34340	BSU11340	fabF	3-oxoacyl-[acyl-carrier-protein] synthase 2 (EC 2.3.1.179) (3-oxoacyl-[acyl-carrier-protein] synthase II) (Beta-ketoacyl-ACP synthase II) (KAS II)	0.1			116	0.977692	48.389	E
P20429	BSU01430	rpoA	DNA-directed RNA polymerase subunit alpha (RNAP subunit alpha) (EC 2.7.7.6) (RNA polymerase subunit alpha) (Transcriptase subunit alpha)	0.1			5	0.977457	93.429	E
P17889	BSU16630	infB	Translation initiation factor IF-2	0.1			401	0.97735	109.88	E
P80868	BSU01120	fusA	Elongation factor G (EF-G) (Vegetative protein 19) (VEG19)	0.1			391	0.976526	153.1	E
P28598	BSU06030	groL	60 kDa chaperonin (GroEL protein) (Protein Cpn60) (Stress protein H5)	0.1			332	0.976415	113.38	E
P08838	BSU13910	ptsI	Phosphoenolpyruvate-protein phosphotransferase (EC 2.7.3.9) (Phosphotransferase system, enzyme I)	0.1			425	0.976411	139.93	E
P39646	BSU37660	pta	Phosphate acetyltransferase (EC 2.3.1.8) (Phosphotransacetylase) (Vegetative protein 43) (VEG43)	0.1			184	0.97624	41.749	E
P50849	BSU16690	pnp	Polyribonucleotide nucleotidyltransferase (EC 2.7.7.8) (Polynucleotide phosphorylase) (PNPase) (Vegetative protein 15) (VEG15)	0.1			434	0.975744	46.464	E
P80868	BSU01120	fusA	Elongation factor G (EF-G) (Vegetative protein 19) (VEG19)	0.1			45	0.97552	135.38	E
P26901	BSU08820	katA	Vegetative catalase (EC 1.11.1.6)	0.1			309	0.974559	77.439	E
P80239	BSU40090	ahpC	Alkyl hydroperoxide reductase C (EC 1.11.1.26) (General stress protein 22) (Peroxiredoxin) (Thioredoxin peroxidase)	0.1			67	0.974296	87.388	E
P40924	BSU33930	pgk	Phosphoglycerate kinase (EC 2.7.2.3)	0.1			136	0.973607	83.792	E
P20166	BSU13890	ptsG	PTS system glucose-specific EIICBA component (EC 2.7.1.199) (EII-Glc/EIII-Glc) (EIICBA-Glc) (EIICBA-Glc 1) [Includes: Glucose permease IIC component (PTS system glucose-specific EIIC component); Glucose-specific phosphotransferase enzyme IIB component (PTS system glucose-specific EIIB component); Glucose-specific phosphotransferase enzyme IIA component (PTS system glucose-specific EIIA component)]	0.1			427	0.973304	88.385	E
P80868	BSU01120	fusA	Elongation factor G (EF-G) (Vegetative protein 19) (VEG19)	0.1			58	0.97321	123.19	E
P51777	BSU21930	cspD	Cold shock protein CspD	0.1			53	0.972773	41.86	E
P46898	BSU01310	rplF	50S ribosomal protein L6 (BL10)	0.1			43	0.972581	91.087	E
P38494	BSU22880	ypfD	30S ribosomal protein S1 homolog	0.1			346	0.972553	73.022	E
P16263	BSU19360	odhB	Dihydrolipoyllysine-residue succinyltransferase component of 2-oxoglutarate dehydrogenase complex (EC 2.3.1.61) (2-oxoglutarate dehydrogenase complex component E2) (OGDC-E2) (Dihydrolipoamide succinyltransferase component of 2-oxoglutarate dehydrogenase complex)	0.1			218	0.972316	81.553	E
Q07833	BSU39230	wapA	tRNA nuclease WapA (EC 3.1.-.-) (Cell wall-associated polypeptide CWBP200) (CWBP200) (RNase WapA) (Toxin WapA) (Wall-associated protein)	0.1			1097	0.9721	116.06	E
P80885	BSU29180	pyk	Pyruvate kinase (PK) (EC 2.7.1.40) (Vegetative protein 17) (VEG17)	0.1			183	0.971759	61.102	E
P17820	BSU25470	dnaK	Chaperone protein DnaK (HSP70) (Heat shock 70 kDa protein) (Heat shock protein 70)	0.1			138	0.971751	54.157	E
P70965	BSU36760	murAA	UDP-N-acetylglucosamine 1-carboxyvinyltransferase 1 (EC 2.5.1.7) (Enoylpyruvate transferase 1) (UDP-N-acetylglucosamine enolpyruvyl transferase 1) (EPT 1)	0.3			426	0.971639	48.659	E
P39794	BSU07800	treP	PTS system trehalose-specific EIIBC component (EIIBC-Tre) (EII-Tre) [Includes: Trehalose-specific phosphotransferase enzyme IIB component (EC 2.7.1.201) (PTS system trehalose-specific EIIB component); Trehalose permease IIC component (PTS system trehalose-specific EIIC component)]	0.2			19	0.971329	56.055	E
Q03223	BSU37070	rpmE	50S ribosomal protein L31	0.1			21	0.971229	44.045	E
P42060	BSU01210	rplV	50S ribosomal protein L22	0.1			59	0.969839	172.18	E
P37560	BSU00630	yabR	Uncharacterized protein YabR	0.1			24	0.969478	45.558	E
P42921	BSU01170	rplD	50S ribosomal protein L4	0.1			161	0.969223	81.317	E
P80866	BSU32710	sufC	Vegetative protein 296 (VEG296)	0.1			146	0.968907	68.536	E
P21466	BSU29660	rpsD	30S ribosomal protein S4 (BS4)	0.1			188	0.968718	80.361	E
O05506	BSU05820	gmuA	PTS system oligo-beta-mannoside-specific EIIA component (Glucomannan utilization protein A) (Oligo-beta-mannoside-specific phosphotransferase enzyme IIA component)	0.6			100	0.967987	47.894	E
P39581	BSU38500	dltA	D-alanine--D-alanyl carrier protein ligase (DCL) (EC 6.2.1.54) (D-alanine--poly(phosphoribitol) ligase subunit 1) (D-alanine-activating enzyme) (DAE)	0.3			411	0.966677	82.171	E
P28598	BSU06030	groL	60 kDa chaperonin (GroEL protein) (Protein Cpn60) (Stress protein H5)	0.1			428	0.966552	88.565	E
P37877	BSU29470	ackA	Acetate kinase (EC 2.7.2.1) (Acetokinase)	0.1			362	0.966539	82.651	E
P16971	BSU16940	recA	Protein RecA (Recombinase A)	0.1			348	0.965952	75.797	E
P26908	BSU27960	rplU	50S ribosomal protein L21 (BL20)	0.1			16	0.965935	81.525	E
P20166	BSU13890	ptsG	PTS system glucose-specific EIICBA component (EC 2.7.1.199) (EII-Glc/EIII-Glc) (EIICBA-Glc) (EIICBA-Glc 1) [Includes: Glucose permease IIC component (PTS system glucose-specific EIIC component); Glucose-specific phosphotransferase enzyme IIB component (PTS system glucose-specific EIIB component); Glucose-specific phosphotransferase enzyme IIA component (PTS system glucose-specific EIIA component)]	0.1			453	0.964935	128.01	E
P18157	BSU09290	glpK	Glycerol kinase (EC 2.7.1.30) (ATP:glycerol 3-phosphotransferase) (Glycerokinase) (GK)	0.3			395	0.96471	43.557	E
P33166	BSU01130	tuf	Elongation factor Tu (EF-Tu) (P-40)	0.1			154	0.964539	73.208	E
P54542	BSU23910	yqjE	Uncharacterized protein YqjE	0.2			281	0.964027	55.261	E
P21464	BSU16490	rpsB	30S ribosomal protein S2 (BS1) (Vegetative protein 209) (VEG209)	0.1			51	0.962901	67.548	E
P42919	BSU01190	rplB	50S ribosomal protein L2 (BL2)	0.1			198	0.961511	116.06	E
P02394	BSU01050	rplL	50S ribosomal protein L7/L12 (BL9) (Vegetative protein 341) (VEG341)	0.1			115	0.960052	58.172	E
O05389	BSU27770	yrbE	Uncharacterized oxidoreductase YrbE (EC 1.-.-.-)	0.5			303	0.959779	47.392	E
O34340	BSU11340	fabF	3-oxoacyl-[acyl-carrier-protein] synthase 2 (EC 2.3.1.179) (3-oxoacyl-[acyl-carrier-protein] synthase II) (Beta-ketoacyl-ACP synthase II) (KAS II)	0.1			244	0.959538	108.25	E
P28598	BSU06030	groL	60 kDa chaperonin (GroEL protein) (Protein Cpn60) (Stress protein H5)	0.1			384	0.959263	71.176	E
P46905	BSU02770	yccK	Uncharacterized oxidoreductase YccK (EC 1.-.-.-)	0.6			254	0.958549	119.06	E
P17820	BSU25470	dnaK	Chaperone protein DnaK (HSP70) (Heat shock 70 kDa protein) (Heat shock protein 70)	0.1			483	0.95817	77.662	E
P37808	BSU36830	atpA	ATP synthase subunit alpha (EC 7.1.2.2) (ATP synthase F1 sector subunit alpha) (F-ATPase subunit alpha) (Vegetative protein 100) (VEG100)	0.1			24	0.958055	94.955	E
P02394	BSU01050	rplL	50S ribosomal protein L7/L12 (BL9) (Vegetative protein 341) (VEG341)	0.1			19	0.957707	48.115	E
P80886	BSU16090	sucC	Succinate--CoA ligase [ADP-forming] subunit beta (EC 6.2.1.5) (Succinyl-CoA synthetase subunit beta) (SCS-beta)	0.1			132	0.957428	123.19	E
P80239	BSU40090	ahpC	Alkyl hydroperoxide reductase C (EC 1.11.1.26) (General stress protein 22) (Peroxiredoxin) (Thioredoxin peroxidase)	0.1			171	0.957048	87.287	E
O34824	BSU01770	glmM	Phosphoglucosamine mutase (EC 5.4.2.10)	0.1			126	0.956934	45.915	E
P80870	BSU31390	yugI	General stress protein 13 (GSP13)	0.1			100	0.956666	66.893	E
P13242	BSU37150	pyrG	CTP synthase (EC 6.3.4.2) (Cytidine 5'-triphosphate synthase) (Cytidine triphosphate synthetase) (CTP synthetase) (CTPS) (UTP--ammonia ligase)	0.2			420	0.956148	45.784	E
P12877	BSU01280	rplE	50S ribosomal protein L5 (BL6)	0.1			140	0.954986	64.224	E
P18255	BSU28950	thrS	Threonine--tRNA ligase 1 (EC 6.1.1.3) (Threonyl-tRNA synthetase 1) (ThrRS 1)	0.1			65	0.954577	48.151	E
P16971	BSU16940	recA	Protein RecA (Recombinase A)	0.1			278	0.954085	115.68	E
P02394	BSU01050	rplL	50S ribosomal protein L7/L12 (BL9) (Vegetative protein 341) (VEG341)	0.1			108	0.953689	112.73	E
P80240	BSU27320	greA	Transcription elongation factor GreA (General stress protein 20M) (GSP20M) (Transcript cleavage factor GreA)	0.1			97	0.953179	70.718	E
P21883	BSU14600	pdhC	Dihydrolipoyllysine-residue acetyltransferase component of pyruvate dehydrogenase complex (EC 2.3.1.12) (Dihydrolipoamide acetyltransferase component of pyruvate dehydrogenase complex) (E2) (S complex, 48 kDa subunit)	0.1			106	0.952245	62.958	E
P42920	BSU01160	rplC	50S ribosomal protein L3 (BL3)	0.1			42	0.950295	90.379	E
P21882	BSU14590	pdhB	Pyruvate dehydrogenase E1 component subunit beta (EC 1.2.4.1) (S complex, 36 kDa subunit)	0.1			134	0.950203	46.145	E
P20282	BSU01410	rpsM	30S ribosomal protein S13 (BS14)	0.1			41	0.949221	55.908	E
P38494	BSU22880	ypfD	30S ribosomal protein S1 homolog	0.1			335	0.945989	121.73	E
P18255	BSU28950	thrS	Threonine--tRNA ligase 1 (EC 6.1.1.3) (Threonyl-tRNA synthetase 1) (ThrRS 1)	0.1			466	0.945837	60.032	E
P38494	BSU22880	ypfD	30S ribosomal protein S1 homolog	0.1			154	0.943417	90.412	E
P80861	BSU12290	yjlD	NADH dehydrogenase-like protein YjlD (EC 1.6.99.-) (Glucose starvation-inducible protein 5) (GSI5)	0.1			235	0.942453	48.354	E
P21468	BSU40910	rpsF	30S ribosomal protein S6 (BS9)	0.1			95	0.94115	89.142	E
P33166	BSU01130	tuf	Elongation factor Tu (EF-Tu) (P-40)	0.1			217	0.940273	88	E
P38494	BSU22880	ypfD	30S ribosomal protein S1 homolog	0.1			93	0.939854	58.782	E
P42919	BSU01190	rplB	50S ribosomal protein L2 (BL2)	0.1			82	0.939028	54.066	E
P20282	BSU01410	rpsM	30S ribosomal protein S13 (BS14)	0.1			51	0.937741	72.817	E
P96614	BSU04580	cshA	DEAD-box ATP-dependent RNA helicase CshA (EC 3.6.4.13)	0.1			393	0.937577	45.349	E
P37877	BSU29470	ackA	Acetate kinase (EC 2.7.2.1) (Acetokinase)	0.1			363	0.937332	94.717	E
P39121	BSU39420	deoC	Deoxyribose-phosphate aldolase (DERA) (EC 4.1.2.4) (2-deoxy-D-ribose 5-phosphate aldolase) (Phosphodeoxyriboaldolase) (Deoxyriboaldolase)	0.2			106	0.936707	57.106	E
O32165	BSU32700	sufD	FeS cluster assembly protein SufD	0.1			67	0.936391	80.76	E
P37870	BSU01070	rpoB	DNA-directed RNA polymerase subunit beta (RNAP subunit beta) (EC 2.7.7.6) (RNA polymerase subunit beta) (Transcriptase subunit beta)	0.1			568	0.935879	147.37	E
P42921	BSU01170	rplD	50S ribosomal protein L4	0.1			127	0.93552	92.856	E
A9LHR4		cpn60	60 kDa chaperonin (Fragment)	0.1			72	0.934395	41.087	E
P28598	BSU06030	groL	60 kDa chaperonin (GroEL protein) (Protein Cpn60) (Stress protein H5)	0.1			162	0.934395	41.087	E
P17820	BSU25470	dnaK	Chaperone protein DnaK (HSP70) (Heat shock 70 kDa protein) (Heat shock protein 70)	0.1			602	0.933847	78.78	E
P21882	BSU14590	pdhB	Pyruvate dehydrogenase E1 component subunit beta (EC 1.2.4.1) (S complex, 36 kDa subunit)	0.1			186	0.93344	110.74	E
P80698	BSU28230	tig	Trigger factor (TF) (EC 5.2.1.8) (PPIase) (Vegetative protein 2) (VEG2)	0.1			18	0.932517	80.316	E
P21474	BSU15990	rpsP	30S ribosomal protein S16 (BS17)	0.1			53	0.927904	84.498	E
P54519	BSU24330	yqhY	Uncharacterized protein YqhY	0.2			36	0.927764	80.786	E
P40924	BSU33930	pgk	Phosphoglycerate kinase (EC 2.7.2.3)	0.1			70	0.927164	73.248	E
P09339	BSU18000	citB	Aconitate/2-methylaconitate hydratase (EC 4.2.1.-) (EC 4.2.1.3) (Aconitate hydratase A) (ACN) (Aconitase) (Iron-responsive protein-like) (IRP-like) (RNA-binding protein)	0.1			888	0.925341	53.567	E
P80861	BSU12290	yjlD	NADH dehydrogenase-like protein YjlD (EC 1.6.99.-) (Glucose starvation-inducible protein 5) (GSI5)	0.1			212	0.925111	54.023	E
P34957	BSU38170	qoxA	Quinol oxidase subunit 2 (EC 1.10.3.-) (Oxidase aa(3)-600 subunit 2) (Quinol oxidase aa3-600, subunit QoxA) (Quinol oxidase polypeptide II)	0.1			282	0.924132	68.576	E
P17903	BSU04710	rsbV	Anti-sigma-B factor antagonist (Anti-anti-sigma-B factor)	0.1			21	0.923958	114.76	E
P80868	BSU01120	fusA	Elongation factor G (EF-G) (Vegetative protein 19) (VEG19)	0.1			205	0.922429	59.709	E
P42920	BSU01160	rplC	50S ribosomal protein L3 (BL3)	0.1			47	0.92218	75.334	E
A9LHR4		cpn60	60 kDa chaperonin (Fragment)	0.1			86	0.920968	75.736	E
P28598	BSU06030	groL	60 kDa chaperonin (GroEL protein) (Protein Cpn60) (Stress protein H5)	0.1			176	0.920968	75.736	E
P80868	BSU01120	fusA	Elongation factor G (EF-G) (Vegetative protein 19) (VEG19)	0.1			577	0.920794	60.489	E
P96706	BSU05650	ydgH	Putative membrane protein YdgH	0.4			105	0.920711	46.406	E
P80698	BSU28230	tig	Trigger factor (TF) (EC 5.2.1.8) (PPIase) (Vegetative protein 2) (VEG2)	0.1			86	0.920407	53.768	E
P37487	BSU40550	ppaC	Manganese-dependent inorganic pyrophosphatase (EC 3.6.1.1) (Pyrophosphate phospho-hydrolase) (PPase)	0.1			87	0.918509	60.549	E
P21881	BSU14580	pdhA	Pyruvate dehydrogenase E1 component subunit alpha (EC 1.2.4.1) (S complex, 42 kDa subunit) (Vegetative protein 220) (VEG220)	0.1			338	0.918305	53.754	E
P28598	BSU06030	groL	60 kDa chaperonin (GroEL protein) (Protein Cpn60) (Stress protein H5)	0.1			336	0.916448	176.18	E
P39646	BSU37660	pta	Phosphate acetyltransferase (EC 2.3.1.8) (Phosphotransacetylase) (Vegetative protein 43) (VEG43)	0.1			180	0.914735	69.482	E
P28599	BSU06020	groS	10 kDa chaperonin (GroES protein) (Protein Cpn10)	0.1			17	0.913219	122.77	E
O05268	BSU32110	yumC	Ferredoxin--NADP reductase 2 (FNR 2) (Fd-NADP(+) reductase 2) (EC 1.18.1.2)	0.1			135	0.913002	47.606	E
P22250	BSU00920	gltX	Glutamate--tRNA ligase (EC 6.1.1.17) (Glutamyl-tRNA synthetase) (GluRS)	0.1			178	0.911453	42.913	E
A3F319		panB	3-methyl-2-oxobutanoate hydroxymethyltransferase (EC 2.1.2.11) (Ketopantoate hydroxymethyltransferase) (KPHMT)	0.2			105	0.910462	75.193	E
P52996	BSU22430	panB	3-methyl-2-oxobutanoate hydroxymethyltransferase (EC 2.1.2.11) (Ketopantoate hydroxymethyltransferase) (KPHMT)	0.2			105	0.910462	75.193	E
P17820	BSU25470	dnaK	Chaperone protein DnaK (HSP70) (Heat shock 70 kDa protein) (Heat shock protein 70)	0.1			501	0.910448	48.283	E
P39772	BSU22360	asnS	Asparagine--tRNA ligase (EC 6.1.1.22) (Asparaginyl-tRNA synthetase) (AsnRS)	0.1			93	0.910298	76.909	E
P80868	BSU01120	fusA	Elongation factor G (EF-G) (Vegetative protein 19) (VEG19)	0.1			612	0.909877	83.776	E
P80700	BSU16500	tsf	Elongation factor Ts (EF-Ts)	0.1			274	0.908311	80.219	E
P80698	BSU28230	tig	Trigger factor (TF) (EC 5.2.1.8) (PPIase) (Vegetative protein 2) (VEG2)	0.1			212	0.907208	70.028	E
P26907	BSU04400	gsiB	Glucose starvation-inducible protein B (General stress protein B)	0.1			54	0.907144	49.483	E
P02394	BSU01050	rplL	50S ribosomal protein L7/L12 (BL9) (Vegetative protein 341) (VEG341)	0.1			56	0.904875	204.08	E
O34558	BSU20790	yopR	SPbeta prophage-derived uncharacterized protein YopR	0.5			212	0.904272	61.48	E
P94527	BSU28760	egsA	Glycerol-1-phosphate dehydrogenase [NAD(P)+] (G1P dehydrogenase) (G1PDH) (EC 1.1.1.261) (Arabinose operon protein AraM) (Enantiomeric glycerophosphate synthase) (sn-glycerol-1-phosphate dehydrogenase)	0.7			25	0.902842	41.412	E
P37869	BSU33900	eno	Enolase (EC 4.2.1.11) (2-phospho-D-glycerate hydro-lyase) (2-phosphoglycerate dehydratase)	0.1			50	0.902007	111.33	E
P21881	BSU14580	pdhA	Pyruvate dehydrogenase E1 component subunit alpha (EC 1.2.4.1) (S complex, 42 kDa subunit) (Vegetative protein 220) (VEG220)	0.1			294	0.901777	65.241	E
P37477	BSU00820	lysS	Lysine--tRNA ligase (EC 6.1.1.6) (Lysyl-tRNA synthetase) (LysRS)	0.2			372	0.899532	43.798	E
P37476	BSU00690	ftsH	ATP-dependent zinc metalloprotease FtsH (EC 3.4.24.-) (Cell division protease FtsH)	0.1			261	0.89596	98.508	E
P12875	BSU01260	rplN	50S ribosomal protein L14	0.1			81	0.893372	70.334	E
P08838	BSU13910	ptsI	Phosphoenolpyruvate-protein phosphotransferase (EC 2.7.3.9) (Phosphotransferase system, enzyme I)	0.1			23	0.892546	44.847	E
P80698	BSU28230	tig	Trigger factor (TF) (EC 5.2.1.8) (PPIase) (Vegetative protein 2) (VEG2)	0.1			92	0.89084	140.89	E
P38494	BSU22880	ypfD	30S ribosomal protein S1 homolog	0.1			66	0.889488	99.747	E
P33166	BSU01130	tuf	Elongation factor Tu (EF-Tu) (P-40)	0.1			74	0.888685	114.59	E
P80868	BSU01120	fusA	Elongation factor G (EF-G) (Vegetative protein 19) (VEG19)	0.1			297	0.887705	62.891	E
P37808	BSU36830	atpA	ATP synthase subunit alpha (EC 7.1.2.2) (ATP synthase F1 sector subunit alpha) (F-ATPase subunit alpha) (Vegetative protein 100) (VEG100)	0.1			391	0.885801	183.74	E
P21466	BSU29660	rpsD	30S ribosomal protein S4 (BS4)	0.1			196	0.885645	67.727	E
P33166	BSU01130	tuf	Elongation factor Tu (EF-Tu) (P-40)	0.1			243	0.885614	151.8	E
P45872	BSU37010	prfA	Peptide chain release factor 1 (RF-1)	0.2			83	0.884119	71.842	E
P21473	BSU16680	rpsO	30S ribosomal protein S15 (BS18)	0.1			19	0.884068	152.88	E
P54531	BSU24080	yqiT	Leucine dehydrogenase (LeuDH) (EC 1.4.1.9)	0.2			49	0.883391	42.647	E
P51777	BSU21930	cspD	Cold shock protein CspD	0.1			43	0.881868	182.04	E
P20429	BSU01430	rpoA	DNA-directed RNA polymerase subunit alpha (RNAP subunit alpha) (EC 2.7.7.6) (RNA polymerase subunit alpha) (Transcriptase subunit alpha)	0.1			254	0.881646	188.96	E
Q06797	BSU01030	rplA	50S ribosomal protein L1 (BL1)	0.1			88	0.87965	108.08	E
P28598	BSU06030	groL	60 kDa chaperonin (GroEL protein) (Protein Cpn60) (Stress protein H5)	0.1			357	0.879077	68.972	E
P94463	BSU15730	fmt	Methionyl-tRNA formyltransferase (EC 2.1.2.9)	0.3			153	0.878544	74.519	E
P14577	BSU01230	rplP	50S ribosomal protein L16	0.1			135	0.877689	99.215	E
P12877	BSU01280	rplE	50S ribosomal protein L5 (BL6)	0.1			165	0.876045	86.378	E
P96716	BSU36250	ywqD	Tyrosine-protein kinase YwqD (EC 2.7.10.2)	0.3			37	0.87524	42.336	E
P70965	BSU36760	murAA	UDP-N-acetylglucosamine 1-carboxyvinyltransferase 1 (EC 2.5.1.7) (Enoylpyruvate transferase 1) (UDP-N-acetylglucosamine enolpyruvyl transferase 1) (EPT 1)	0.3			148	0.873445	82.171	E
O05268	BSU32110	yumC	Ferredoxin--NADP reductase 2 (FNR 2) (Fd-NADP(+) reductase 2) (EC 1.18.1.2)	0.1			107	0.868189	47.971	E
P80866	BSU32710	sufC	Vegetative protein 296 (VEG296)	0.1			75	0.865877	108.75	E
P21883	BSU14600	pdhC	Dihydrolipoyllysine-residue acetyltransferase component of pyruvate dehydrogenase complex (EC 2.3.1.12) (Dihydrolipoamide acetyltransferase component of pyruvate dehydrogenase complex) (E2) (S complex, 48 kDa subunit)	0.1			62	0.865066	179.79	E
P17921	BSU28640	pheS	Phenylalanine--tRNA ligase alpha subunit (EC 6.1.1.20) (Phenylalanyl-tRNA synthetase alpha subunit) (PheRS)	0.2			260	0.864336	61.304	E
P21880	BSU14610	pdhD	Dihydrolipoyl dehydrogenase (EC 1.8.1.4) (Dihydrolipoamide dehydrogenase) (E3 component of pyruvate complex) (S complex, 50 kDa subunit)	0.1			132	0.861565	119.25	E
P17889	BSU16630	infB	Translation initiation factor IF-2	0.1			667	0.861049	69.729	E
P39148	BSU36900	glyA	Serine hydroxymethyltransferase (SHMT) (Serine methylase) (EC 2.1.2.1)	0.1			348	0.860727	56.959	E
P42921	BSU01170	rplD	50S ribosomal protein L4	0.1			204	0.859205	45.161	E
P80868	BSU01120	fusA	Elongation factor G (EF-G) (Vegetative protein 19) (VEG19)	0.1			220	0.858673	79.875	E
P80885	BSU29180	pyk	Pyruvate kinase (PK) (EC 2.7.1.40) (Vegetative protein 17) (VEG17)	0.1			336	0.858621	50.703	E
P21880	BSU14610	pdhD	Dihydrolipoyl dehydrogenase (EC 1.8.1.4) (Dihydrolipoamide dehydrogenase) (E3 component of pyruvate complex) (S complex, 50 kDa subunit)	0.1			245	0.856429	99.451	E
P17820	BSU25470	dnaK	Chaperone protein DnaK (HSP70) (Heat shock 70 kDa protein) (Heat shock protein 70)	0.1			600	0.855718	114.4	E
P21476	BSU01200	rpsS	30S ribosomal protein S19 (BS19)	0.1			64	0.854799	72.705	E
P37869	BSU33900	eno	Enolase (EC 4.2.1.11) (2-phospho-D-glycerate hydro-lyase) (2-phosphoglycerate dehydratase)	0.1			296	0.854128	116.29	E
P17889	BSU16630	infB	Translation initiation factor IF-2	0.1			669	0.853019	64.65	E
P20166	BSU13890	ptsG	PTS system glucose-specific EIICBA component (EC 2.7.1.199) (EII-Glc/EIII-Glc) (EIICBA-Glc) (EIICBA-Glc 1) [Includes: Glucose permease IIC component (PTS system glucose-specific EIIC component); Glucose-specific phosphotransferase enzyme IIB component (PTS system glucose-specific EIIB component); Glucose-specific phosphotransferase enzyme IIA component (PTS system glucose-specific EIIA component)]	0.1			644	0.849932	102.69	E
P42919	BSU01190	rplB	50S ribosomal protein L2 (BL2)	0.1			100	0.848765	98.105	E
P33166	BSU01130	tuf	Elongation factor Tu (EF-Tu) (P-40)	0.1			145	0.848599	143.28	E
P12425	BSU17460	glnA	Glutamine synthetase (GS) (EC 6.3.1.2) (Glutamate--ammonia ligase) (Glutamine synthetase I alpha) (GSI alpha)	0.1			424	0.846407	52.786	E
P16971	BSU16940	recA	Protein RecA (Recombinase A)	0.1			292	0.84539	109.66	E
P39148	BSU36900	glyA	Serine hydroxymethyltransferase (SHMT) (Serine methylase) (EC 2.1.2.1)	0.1			388	0.844206	56.122	E
P32727	BSU16600	nusA	Transcription termination/antitermination protein NusA	0.1			134	0.843618	103.34	E
P37871	BSU01080	rpoC	DNA-directed RNA polymerase subunit beta' (RNAP subunit beta') (EC 2.7.7.6) (RNA polymerase subunit beta') (Transcriptase subunit beta')	0.1			551	0.843488	53.317	E
P33166	BSU01130	tuf	Elongation factor Tu (EF-Tu) (P-40)	0.1			57	0.843488	81.651	E
P37809	BSU36810	atpD	ATP synthase subunit beta (EC 7.1.2.2) (ATP synthase F1 sector subunit beta) (F-ATPase subunit beta) (Vegetative protein 31) (VEG31)	0.1			361	0.843221	54.501	E
P80868	BSU01120	fusA	Elongation factor G (EF-G) (Vegetative protein 19) (VEG19)	0.1			305	0.84087	89.46	E
P08838	BSU13910	ptsI	Phosphoenolpyruvate-protein phosphotransferase (EC 2.7.3.9) (Phosphotransferase system, enzyme I)	0.1			366	0.839951	116.52	E
P12425	BSU17460	glnA	Glutamine synthetase (GS) (EC 6.3.1.2) (Glutamate--ammonia ligase) (Glutamine synthetase I alpha) (GSI alpha)	0.1			132	0.838071	49.326	E
P12874	BSU01250	rpsQ	30S ribosomal protein S17 (BS16)	0.1			82	0.834581	77.282	E
Q04797	BSU16750	asd	Aspartate-semialdehyde dehydrogenase (ASA dehydrogenase) (ASADH) (EC 1.2.1.11) (Aspartate-beta-semialdehyde dehydrogenase)	0.1			257	0.834317	61.109	E
P21880	BSU14610	pdhD	Dihydrolipoyl dehydrogenase (EC 1.8.1.4) (Dihydrolipoamide dehydrogenase) (E3 component of pyruvate complex) (S complex, 50 kDa subunit)	0.1			9	0.833353	87.802	E
P21466	BSU29660	rpsD	30S ribosomal protein S4 (BS4)	0.1			170	0.829726	113.14	E
P40778	BSU29790	murC	UDP-N-acetylmuramate--L-alanine ligase (EC 6.3.2.8) (UDP-N-acetylmuramoyl-L-alanine synthetase)	0.3			226	0.828942	170.06	E
Q06796	BSU01020	rplK	50S ribosomal protein L11 (BL11)	0.1			62	0.827773	141.85	E
P17820	BSU25470	dnaK	Chaperone protein DnaK (HSP70) (Heat shock 70 kDa protein) (Heat shock protein 70)	0.1			490	0.827666	58.274	E
P21881	BSU14580	pdhA	Pyruvate dehydrogenase E1 component subunit alpha (EC 1.2.4.1) (S complex, 42 kDa subunit) (Vegetative protein 220) (VEG220)	0.1			292	0.824217	91.355	E
P02394	BSU01050	rplL	50S ribosomal protein L7/L12 (BL9) (Vegetative protein 341) (VEG341)	0.1			6	0.824173	60.157	E
P37869	BSU33900	eno	Enolase (EC 4.2.1.11) (2-phospho-D-glycerate hydro-lyase) (2-phosphoglycerate dehydratase)	0.1			292	0.823694	231.77	E
P13242	BSU37150	pyrG	CTP synthase (EC 6.3.4.2) (Cytidine 5'-triphosphate synthase) (Cytidine triphosphate synthetase) (CTP synthetase) (CTPS) (UTP--ammonia ligase)	0.2			332	0.823054	112.33	E
Q06795	BSU01010	nusG	Transcription termination/antitermination protein NusG	0.1			146	0.821326	119.87	E
Q02115	BSU35650	tagU	Polyisoprenyl-teichoic acid--peptidoglycan teichoic acid transferase TagU (EC 2.7.8.-) (Membrane-bound protein LytR)	0.2			76	0.82005	94.688	E
P32081	BSU09100	cspB	Cold shock protein CspB (Major cold shock protein)	0.1			21	0.818982	110.31	E
P20166	BSU13890	ptsG	PTS system glucose-specific EIICBA component (EC 2.7.1.199) (EII-Glc/EIII-Glc) (EIICBA-Glc) (EIICBA-Glc 1) [Includes: Glucose permease IIC component (PTS system glucose-specific EIIC component); Glucose-specific phosphotransferase enzyme IIB component (PTS system glucose-specific EIIB component); Glucose-specific phosphotransferase enzyme IIA component (PTS system glucose-specific EIIA component)]	0.1			639	0.818384	71.558	E
P08877	BSU13900	ptsH	Phosphocarrier protein HPr (Histidine-containing protein)	0.1			78	0.817964	118.51	E
A3F3D6		ndk	Nucleoside diphosphate kinase (NDK) (NDP kinase) (EC 2.7.4.6) (Nucleoside-2-P kinase)	0.1			122	0.817335	40.008	E
P31103	BSU22730	ndk	Nucleoside diphosphate kinase (NDK) (NDP kinase) (EC 2.7.4.6) (Nucleoside-2-P kinase)	0.1			122	0.817335	40.008	E
P37808	BSU36830	atpA	ATP synthase subunit alpha (EC 7.1.2.2) (ATP synthase F1 sector subunit alpha) (F-ATPase subunit alpha) (Vegetative protein 100) (VEG100)	0.1			393	0.816849	164.2	E
P80698	BSU28230	tig	Trigger factor (TF) (EC 5.2.1.8) (PPIase) (Vegetative protein 2) (VEG2)	0.1			96	0.8152	102.89	E
P80698	BSU28230	tig	Trigger factor (TF) (EC 5.2.1.8) (PPIase) (Vegetative protein 2) (VEG2)	0.1			312	0.814371	60.42	E
P09124	BSU33940	gapA	Glyceraldehyde-3-phosphate dehydrogenase 1 (GAPDH) (EC 1.2.1.12) (NAD-dependent glyceraldehyde-3-phosphate dehydrogenase)	0.1			95	0.812742	68.515	E
O31498	BSU06620	ligA	DNA ligase (EC 6.5.1.2) (Polydeoxyribonucleotide synthase [NAD(+)])	0.3			260	0.812085	47.204	E
P21880	BSU14610	pdhD	Dihydrolipoyl dehydrogenase (EC 1.8.1.4) (Dihydrolipoamide dehydrogenase) (E3 component of pyruvate complex) (S complex, 50 kDa subunit)	0.1			358	0.811861	41.097	E
P08838	BSU13910	ptsI	Phosphoenolpyruvate-protein phosphotransferase (EC 2.7.3.9) (Phosphotransferase system, enzyme I)	0.1			310	0.807097	55.724	E
P08838	BSU13910	ptsI	Phosphoenolpyruvate-protein phosphotransferase (EC 2.7.3.9) (Phosphotransferase system, enzyme I)	0.1			121	0.806477	45.608	E
P12425	BSU17460	glnA	Glutamine synthetase (GS) (EC 6.3.1.2) (Glutamate--ammonia ligase) (Glutamine synthetase I alpha) (GSI alpha)	0.1			142	0.80623	65.038	E
Q03523	BSU15180	murE	UDP-N-acetylmuramoyl-L-alanyl-D-glutamate--2,6-diaminopimelate ligase (EC 6.3.2.13) (Meso-A2pm-adding enzyme) (Meso-diaminopimelate-adding enzyme) (UDP-MurNAc-L-Ala-D-Glu:meso-diaminopimelate ligase) (UDP-MurNAc-tripeptide synthetase) (UDP-N-acetylmuramyl-tripeptide synthetase)	0.3			28	0.804338	59.282	E
P28599	BSU06020	groS	10 kDa chaperonin (GroES protein) (Protein Cpn10)	0.1			77	0.803297	78.149	E
P12879	BSU01300	rpsH	30S ribosomal protein S8 (BS8)	0.1			53	0.801993	49.097	E
P38494	BSU22880	ypfD	30S ribosomal protein S1 homolog	0.1			334	0.801799	76.943	E
P54375	BSU25020	sodA	Superoxide dismutase [Mn] (EC 1.15.1.1) (General stress protein 24) (GSP24)	0.1			55	0.79949	107.73	E
P21465	BSU01220	rpsC	30S ribosomal protein S3 (BS3) (BS2)	0.1			55	0.797675	63.76	E
P33166	BSU01130	tuf	Elongation factor Tu (EF-Tu) (P-40)	0.1			209	0.797183	153.19	E
O34478	BSU02720	yccF	Uncharacterized protein YccF	0.4			43	0.796789	49.595	E
P21464	BSU16490	rpsB	30S ribosomal protein S2 (BS1) (Vegetative protein 209) (VEG209)	0.1			242	0.79667	85.496	E
P40924	BSU33930	pgk	Phosphoglycerate kinase (EC 2.7.2.3)	0.1			264	0.796564	52.79	E
A3F3D5		cheR	Methyl-accepting chemotaxis protein methyltransferase (EC 2.1.1.80)	0.3			106	0.795138	43.349	E
P31105	BSU22720	cheR	Chemotaxis protein methyltransferase (EC 2.1.1.80)	0.3			106	0.795138	43.349	E
P21470	BSU01500	rpsI	30S ribosomal protein S9 (BS10)	0.1			46	0.794501	44.252	E
P13242	BSU37150	pyrG	CTP synthase (EC 6.3.4.2) (Cytidine 5'-triphosphate synthase) (Cytidine triphosphate synthetase) (CTP synthetase) (CTPS) (UTP--ammonia ligase)	0.2			474	0.793239	58.024	E
P37870	BSU01070	rpoB	DNA-directed RNA polymerase subunit beta (RNAP subunit beta) (EC 2.7.7.6) (RNA polymerase subunit beta) (Transcriptase subunit beta)	0.1			697	0.792912	54.066	E
P70965	BSU36760	murAA	UDP-N-acetylglucosamine 1-carboxyvinyltransferase 1 (EC 2.5.1.7) (Enoylpyruvate transferase 1) (UDP-N-acetylglucosamine enolpyruvyl transferase 1) (EPT 1)	0.3			420	0.791235	104.45	E
P17865	BSU15290	ftsZ	Cell division protein FtsZ	0.1			32	0.7893	41.423	E
P80698	BSU28230	tig	Trigger factor (TF) (EC 5.2.1.8) (PPIase) (Vegetative protein 2) (VEG2)	0.1			301	0.788828	66.448	E
P80698	BSU28230	tig	Trigger factor (TF) (EC 5.2.1.8) (PPIase) (Vegetative protein 2) (VEG2)	0.1			377	0.785513	98.077	E
P54420	BSU30540	asnB	Asparagine synthetase [glutamine-hydrolyzing] 1 (EC 6.3.5.4)	0.2			297	0.783117	78.078	E
P27876	BSU33920	tpiA	Triosephosphate isomerase (TIM) (TPI) (EC 5.3.1.1) (Triose-phosphate isomerase)	0.1			156	0.781846	68.835	E
P02968	BSU35360	hag	Flagellin (GSX1) (Hag)	0.1			122	0.776942	66.3	E
P37870	BSU01070	rpoB	DNA-directed RNA polymerase subunit beta (RNAP subunit beta) (EC 2.7.7.6) (RNA polymerase subunit beta) (Transcriptase subunit beta)	0.1			857	0.77661	120.31	E
P07343	BSU33040	fumC	Fumarate hydratase class II (Fumarase C) (EC 4.2.1.2) (Aerobic fumarase) (Iron-independent fumarase)	0.1			239	0.775873	42.347	E
O32028	BSU27270	mtnN	5'-methylthioadenosine/S-adenosylhomocysteine nucleosidase (MTA/SAH nucleosidase) (MTAN) (EC 3.2.2.9) (5'-deoxyadenosine nucleosidase) (DOA nucleosidase) (dAdo nucleosidase) (5'-methylthioadenosine nucleosidase) (MTA nucleosidase) (S-adenosylhomocysteine nucleosidase) (AdoHcy nucleosidase) (SAH nucleosidase) (SRH nucleosidase)	0.2			10	0.774778	58.079	E
P32081	BSU09100	cspB	Cold shock protein CspB (Major cold shock protein)	0.1			53	0.774666	109.14	E
O32165	BSU32700	sufD	FeS cluster assembly protein SufD	0.1			297	0.772768	64.565	E
P21465	BSU01220	rpsC	30S ribosomal protein S3 (BS3) (BS2)	0.1			34	0.772562	54.784	E
P37518	BSU40920	ychF	Ribosome-binding ATPase YchF	0.2			316	0.771512	68.277	E
P21883	BSU14600	pdhC	Dihydrolipoyllysine-residue acetyltransferase component of pyruvate dehydrogenase complex (EC 2.3.1.12) (Dihydrolipoamide acetyltransferase component of pyruvate dehydrogenase complex) (E2) (S complex, 48 kDa subunit)	0.1			114	0.771243	72.495	E
P51777	BSU21930	cspD	Cold shock protein CspD	0.1			46	0.771226	48.59	E
O34600	BSU29250	nrnA	Bifunctional oligoribonuclease and PAP phosphatase NrnA (EC 3.1.-.-) (3'(2'),5'-bisphosphate nucleotidase) (EC 3.1.3.7) (3'-phosphoadenosine 5'-phosphate phosphatase) (PAP phosphatase) (nanoRNase)	0.2			256	0.769169	49.448	E
P39772	BSU22360	asnS	Asparagine--tRNA ligase (EC 6.1.1.22) (Asparaginyl-tRNA synthetase) (AsnRS)	0.1			97	0.769097	77.675	E
P80698	BSU28230	tig	Trigger factor (TF) (EC 5.2.1.8) (PPIase) (Vegetative protein 2) (VEG2)	0.1			9	0.767926	77.969	E
P39795	BSU07810	treA	Trehalose-6-phosphate hydrolase (EC 3.2.1.93) (Alpha,alpha-phosphotrehalase) (Phospho-alpha-(1-1)-glucosidase)	0.3			85	0.76626	96.666	E
P80868	BSU01120	fusA	Elongation factor G (EF-G) (Vegetative protein 19) (VEG19)	0.1			201	0.758875	47.037	E
P21882	BSU14590	pdhB	Pyruvate dehydrogenase E1 component subunit beta (EC 1.2.4.1) (S complex, 36 kDa subunit)	0.1			223	0.758408	162.09	E
P37869	BSU33900	eno	Enolase (EC 4.2.1.11) (2-phospho-D-glycerate hydro-lyase) (2-phosphoglycerate dehydratase)	0.1			216	0.757791	82.998	E
P70998	BSU37500	speE	Polyamine aminopropyltransferase (Putrescine aminopropyltransferase) (PAPT) (Spermidine synthase) (SPDS) (SPDSY) (EC 2.5.1.16)	0.2			147	0.755293	90.468	E
O30509	BSU06690	gatB	Aspartyl/glutamyl-tRNA(Asn/Gln) amidotransferase subunit B (Asp/Glu-ADT subunit B) (EC 6.3.5.-)	0.1			124	0.752837	76.1	E
P26908	BSU27960	rplU	50S ribosomal protein L21 (BL20)	0.1			36	0.751305	70.174	E
P13800	BSU35490	degU	Transcriptional regulatory protein DegU (Protease production enhancer protein)	0.1	pAsp	56	5	1	117.93	N
P35163	BSU23120	resD	Transcriptional regulatory protein ResD	0.2	pAsp	57	30	1	186.75	N
P35163	BSU23120	resD	Transcriptional regulatory protein ResD	0.2	pAsp	57	91	1	51.688	N
P35163	BSU23120	resD	Transcriptional regulatory protein ResD	0.2	pAsp	57	50	1	59.429	N
P37478	BSU40410	walR	Transcriptional regulatory protein WalR	0.3	pAsp	53	116	1	56.51	N
P35163	BSU23120	resD	Transcriptional regulatory protein ResD	0.2	pAsp	57	5	0.999285	88.177	N
P13800	BSU35490	degU	Transcriptional regulatory protein DegU (Protease production enhancer protein)	0.1	pAsp	56	134	0.995262	55.258	N
P13800	BSU35490	degU	Transcriptional regulatory protein DegU (Protease production enhancer protein)	0.1	pAsp	56	203	0.940934	47.187	N
O34847	BSU29200	accA	Acetyl-coenzyme A carboxylase carboxyl transferase subunit alpha (ACCase subunit alpha) (Acetyl-CoA carboxylase carboxyltransferase subunit alpha) (EC 2.1.3.15)	0.2			53	1	57.281	N
P49786	BSU24350	accB	Biotin carboxyl carrier protein of acetyl-CoA carboxylase (BCCP)	0.1			26	1	62.617	N
P49787	BSU24340	accC1	Biotin carboxylase 1 (EC 6.3.4.14) (Acetyl-CoA carboxylase subunit A 1) (ACC 1) (EC 6.4.1.2)	0.2			341	1	123.72	N
P49787	BSU24340	accC1	Biotin carboxylase 1 (EC 6.3.4.14) (Acetyl-CoA carboxylase subunit A 1) (ACC 1) (EC 6.4.1.2)	0.2			438	1	163.64	N
P49787	BSU24340	accC1	Biotin carboxylase 1 (EC 6.3.4.14) (Acetyl-CoA carboxylase subunit A 1) (ACC 1) (EC 6.4.1.2)	0.2			9	1	86.344	N
P49787	BSU24340	accC1	Biotin carboxylase 1 (EC 6.3.4.14) (Acetyl-CoA carboxylase subunit A 1) (ACC 1) (EC 6.4.1.2)	0.2			291	1	60.436	N
C0SP93	BSU29210	accD	Acetyl-coenzyme A carboxylase carboxyl transferase subunit beta (ACCase subunit beta) (Acetyl-CoA carboxylase carboxyltransferase subunit beta) (EC 2.1.3.15)	0.2			107	1	82.171	N
P37877	BSU29470	ackA	Acetate kinase (EC 2.7.2.1) (Acetokinase)	0.1			293	1	115.73	N
P37877	BSU29470	ackA	Acetate kinase (EC 2.7.2.1) (Acetokinase)	0.1			81	1	80.782	N
P37877	BSU29470	ackA	Acetate kinase (EC 2.7.2.1) (Acetokinase)	0.1			8	1	125.75	N
P37877	BSU29470	ackA	Acetate kinase (EC 2.7.2.1) (Acetokinase)	0.1			51	1	88.427	N
P37877	BSU29470	ackA	Acetate kinase (EC 2.7.2.1) (Acetokinase)	0.1			242	1	58.98	N
P16304	BSU01370	adk	Adenylate kinase (AK) (EC 2.7.4.3) (ATP-AMP transphosphorylase) (ATP:AMP phosphotransferase) (Adenylate monophosphate kinase) (Superoxide-inducible protein 16) (SOI16)	0.1			164	1	90.108	N
P16304	BSU01370	adk	Adenylate kinase (AK) (EC 2.7.4.3) (ATP-AMP transphosphorylase) (ATP:AMP phosphotransferase) (Adenylate monophosphate kinase) (Superoxide-inducible protein 16) (SOI16)	0.1			2	1	54.343	N
P80239	BSU40090	ahpC	Alkyl hydroperoxide reductase C (EC 1.11.1.26) (General stress protein 22) (Peroxiredoxin) (Thioredoxin peroxidase)	0.1			26	1	219.33	N
P80239	BSU40090	ahpC	Alkyl hydroperoxide reductase C (EC 1.11.1.26) (General stress protein 22) (Peroxiredoxin) (Thioredoxin peroxidase)	0.1			147	1	99.442	N
P80239	BSU40090	ahpC	Alkyl hydroperoxide reductase C (EC 1.11.1.26) (General stress protein 22) (Peroxiredoxin) (Thioredoxin peroxidase)	0.1			150	1	116.9	N
P80239	BSU40090	ahpC	Alkyl hydroperoxide reductase C (EC 1.11.1.26) (General stress protein 22) (Peroxiredoxin) (Thioredoxin peroxidase)	0.1			107	1	158.52	N
P42974	BSU40100	ahpF	NADH dehydrogenase (EC 7.1.1.2) (Alkyl hydroperoxide reductase)	0.1			397	1	73.9	N
P42974	BSU40100	ahpF	NADH dehydrogenase (EC 7.1.1.2) (Alkyl hydroperoxide reductase)	0.1			6	1	41.502	N
O34526	BSU27410	alaS	Alanine--tRNA ligase (EC 6.1.1.7) (Alanyl-tRNA synthetase) (AlaRS)	0.2			748	1	113.26	N
O34526	BSU27410	alaS	Alanine--tRNA ligase (EC 6.1.1.7) (Alanyl-tRNA synthetase) (AlaRS)	0.2			594	1	148.15	N
O34526	BSU27410	alaS	Alanine--tRNA ligase (EC 6.1.1.7) (Alanyl-tRNA synthetase) (AlaRS)	0.2			157	1	109.56	N
O34526	BSU27410	alaS	Alanine--tRNA ligase (EC 6.1.1.7) (Alanyl-tRNA synthetase) (AlaRS)	0.2			73	1	182.39	N
O34526	BSU27410	alaS	Alanine--tRNA ligase (EC 6.1.1.7) (Alanyl-tRNA synthetase) (AlaRS)	0.2			77	1	90.906	N
O34526	BSU27410	alaS	Alanine--tRNA ligase (EC 6.1.1.7) (Alanyl-tRNA synthetase) (AlaRS)	0.2			297	1	50.178	N
Q08352	BSU31930	ald	Alanine dehydrogenase (EC 1.4.1.1) (Stage V sporulation protein N)	0.1			335	1	81.642	N
Q08352	BSU31930	ald	Alanine dehydrogenase (EC 1.4.1.1) (Stage V sporulation protein N)	0.1			180	1	58.246	N
Q08352	BSU31930	ald	Alanine dehydrogenase (EC 1.4.1.1) (Stage V sporulation protein N)	0.1			47	1	58.98	N
P94358	BSU38830	aldY	Putative aldehyde dehydrogenase AldY (EC 1.2.1.3)	1			7	1	69.383	N
P10725	BSU04640	alr1	Alanine racemase 1 (EC 5.1.1.1)	0.4			43	1	55.899	N
P26900	BSU23580	ansA	L-asparaginase 1 (L-ASNase 1) (EC 3.5.1.1) (L-asparagine amidohydrolase 1)	0.4			125	1	45.368	N
P26899	BSU23570	ansB	Aspartate ammonia-lyase (Aspartase) (EC 4.3.1.1)	0.3			63	1	79.974	N
P26899	BSU23570	ansB	Aspartate ammonia-lyase (Aspartase) (EC 4.3.1.1)	0.3			458	1	78.836	N
P26899	BSU23570	ansB	Aspartate ammonia-lyase (Aspartase) (EC 4.3.1.1)	0.3			397	1	55.531	N
P26899	BSU23570	ansB	Aspartate ammonia-lyase (Aspartase) (EC 4.3.1.1)	0.3			296	1	75.269	N
P26899	BSU23570	ansB	Aspartate ammonia-lyase (Aspartase) (EC 4.3.1.1)	0.3			50	1	85.536	N
P26899	BSU23570	ansB	Aspartate ammonia-lyase (Aspartase) (EC 4.3.1.1)	0.3			416	1	49.973	N
P26899	BSU23570	ansB	Aspartate ammonia-lyase (Aspartase) (EC 4.3.1.1)	0.3			389	1	91.9	N
P26899	BSU23570	ansB	Aspartate ammonia-lyase (Aspartase) (EC 4.3.1.1)	0.3			290	1	64.567	N
P46906	BSU37330	argS	Arginine--tRNA ligase (EC 6.1.1.19) (Arginyl-tRNA synthetase) (ArgRS)	0.2			154	1	54.898	N
P46906	BSU37330	argS	Arginine--tRNA ligase (EC 6.1.1.19) (Arginyl-tRNA synthetase) (ArgRS)	0.2			224	1	123.14	N
P46906	BSU37330	argS	Arginine--tRNA ligase (EC 6.1.1.19) (Arginyl-tRNA synthetase) (ArgRS)	0.2			523	1	79.489	N
P46906	BSU37330	argS	Arginine--tRNA ligase (EC 6.1.1.19) (Arginyl-tRNA synthetase) (ArgRS)	0.2			500	1	103.95	N
P39912	BSU29750	aroA	Protein AroA(G) [Includes: Phospho-2-dehydro-3-deoxyheptonate aldolase (EC 2.5.1.54) (3-deoxy-D-arabino-heptulosonate 7-phosphate synthase) (DAHP synthase) (Phospho-2-keto-3-deoxyheptonate aldolase); Chorismate mutase (EC 5.4.99.5)]	0.1			272	1	69.03	N
P39912	BSU29750	aroA	Protein AroA(G) [Includes: Phospho-2-dehydro-3-deoxyheptonate aldolase (EC 2.5.1.54) (3-deoxy-D-arabino-heptulosonate 7-phosphate synthase) (DAHP synthase) (Phospho-2-keto-3-deoxyheptonate aldolase); Chorismate mutase (EC 5.4.99.5)]	0.1			3	1	58.981	N
Q04797	BSU16750	asd	Aspartate-semialdehyde dehydrogenase (ASA dehydrogenase) (ASADH) (EC 1.2.1.11) (Aspartate-beta-semialdehyde dehydrogenase)	0.1			96	1	89.805	N
Q04797	BSU16750	asd	Aspartate-semialdehyde dehydrogenase (ASA dehydrogenase) (ASADH) (EC 1.2.1.11) (Aspartate-beta-semialdehyde dehydrogenase)	0.1			28	1	148.44	N
P54420	BSU30540	asnB	Asparagine synthetase [glutamine-hydrolyzing] 1 (EC 6.3.5.4)	0.2			250	1	72.29	N
P54420	BSU30540	asnB	Asparagine synthetase [glutamine-hydrolyzing] 1 (EC 6.3.5.4)	0.2			466	1	165.73	N
P54420	BSU30540	asnB	Asparagine synthetase [glutamine-hydrolyzing] 1 (EC 6.3.5.4)	0.2			324	1	80.96	N
P39772	BSU22360	asnS	Asparagine--tRNA ligase (EC 6.1.1.22) (Asparaginyl-tRNA synthetase) (AsnRS)	0.1			258	1	59.8	N
P53001	BSU22370	aspB	Aspartate aminotransferase (AspAT) (EC 2.6.1.1) (Transaminase A)	0.1			147	1	62.94	N
P53001	BSU22370	aspB	Aspartate aminotransferase (AspAT) (EC 2.6.1.1) (Transaminase A)	0.1			301	1	112.17	N
P53001	BSU22370	aspB	Aspartate aminotransferase (AspAT) (EC 2.6.1.1) (Transaminase A)	0.1			57	1	52.867	N
P53001	BSU22370	aspB	Aspartate aminotransferase (AspAT) (EC 2.6.1.1) (Transaminase A)	0.1			366	1	53.237	N
O32038	BSU27550	aspS	Aspartate--tRNA(Asp/Asn) ligase (EC 6.1.1.23) (Aspartyl-tRNA synthetase) (AspRS) (Non-discriminating aspartyl-tRNA synthetase) (ND-AspRS)	0.1			284	1	74.486	N
P37808	BSU36830	atpA	ATP synthase subunit alpha (EC 7.1.2.2) (ATP synthase F1 sector subunit alpha) (F-ATPase subunit alpha) (Vegetative protein 100) (VEG100)	0.1			502	1	106.29	N
P37808	BSU36830	atpA	ATP synthase subunit alpha (EC 7.1.2.2) (ATP synthase F1 sector subunit alpha) (F-ATPase subunit alpha) (Vegetative protein 100) (VEG100)	0.1			480	1	68.893	N
P37813	BSU36870	atpB	ATP synthase subunit a (ATP synthase F0 sector subunit a) (F-ATPase subunit 6)	0.2			162	1	47.606	N
P37813	BSU36870	atpB	ATP synthase subunit a (ATP synthase F0 sector subunit a) (F-ATPase subunit 6)	0.2			61	1	57.785	N
P37812	BSU36800	atpC	ATP synthase epsilon chain (ATP synthase F1 sector epsilon subunit) (F-ATPase epsilon subunit)	0.1			7	1	148.38	N
P37809	BSU36810	atpD	ATP synthase subunit beta (EC 7.1.2.2) (ATP synthase F1 sector subunit beta) (F-ATPase subunit beta) (Vegetative protein 31) (VEG31)	0.1			196	1	110.32	N
P37809	BSU36810	atpD	ATP synthase subunit beta (EC 7.1.2.2) (ATP synthase F1 sector subunit beta) (F-ATPase subunit beta) (Vegetative protein 31) (VEG31)	0.1			209	1	174.02	N
P37810	BSU36820	atpG	ATP synthase gamma chain (ATP synthase F1 sector gamma subunit) (F-ATPase gamma subunit)	0.1			55	1	134.25	N
O35022	BSU19230	azoR1	FMN-dependent NADH-azoreductase 1 (EC 1.7.1.17) (Azo-dye reductase 1) (FMN-dependent NADH-azo compound oxidoreductase 1)	0.1			161	1	52.612	N
O32218	BSU33480	bdbD	Disulfide bond formation protein D (Disulfide oxidoreductase D) (Thiol-disulfide oxidoreductase D)	0.1			76	1	45.335	N
O34788	BSU06240	bdhA	(R,R)-butanediol dehydrogenase (EC 1.1.1.4) (Acetoin reductase/2,3-butanediol dehydrogenase) (AR/BDH)	0.1			278	1	55.261	N
O34788	BSU06240	bdhA	(R,R)-butanediol dehydrogenase (EC 1.1.1.4) (Acetoin reductase/2,3-butanediol dehydrogenase) (AR/BDH)	0.1			346	1	51.903	N
P37940	BSU24050	bfmBAA	2-oxoisovalerate dehydrogenase subunit alpha (EC 1.2.4.4) (Branched-chain alpha-keto acid dehydrogenase E1 component alpha chain) (BCKDH E1-alpha)	0.2			101	1	51.066	N
O07631	BSU14770	bipA	50S ribosomal subunit assembly factor BipA (EC 3.6.5.-) (GTP-binding protein BipA)	0.2			48	1	85.355	N
O07631	BSU14770	bipA	50S ribosomal subunit assembly factor BipA (EC 3.6.5.-) (GTP-binding protein BipA)	0.2			374	1	78.324	N
O07631	BSU14770	bipA	50S ribosomal subunit assembly factor BipA (EC 3.6.5.-) (GTP-binding protein BipA)	0.2			468	1	136.14	N
O07631	BSU14770	bipA	50S ribosomal subunit assembly factor BipA (EC 3.6.5.-) (GTP-binding protein BipA)	0.2			575	1	112.45	N
O07631	BSU14770	bipA	50S ribosomal subunit assembly factor BipA (EC 3.6.5.-) (GTP-binding protein BipA)	0.2			73	1	83.253	N
O07631	BSU14770	bipA	50S ribosomal subunit assembly factor BipA (EC 3.6.5.-) (GTP-binding protein BipA)	0.2			66	1	78.324	N
P42982	BSU22460	bshA	N-acetyl-alpha-D-glucosaminyl L-malate synthase (GlcNAc-Mal synthase) (EC 2.4.1.-) (L-malic acid glycosyltransferase BshA)	0.6			355	1	60.401	N
O31857	BSU19460	bshB2	Probable N-acetyl-alpha-D-glucosaminyl L-malate deacetylase 2 (GlcNAc-Mal deacetylase 2) (EC 3.5.1.-)	#N/A			155	1	42.813	N
P25144	BSU29740	ccpA	Catabolite control protein A (Glucose-resistance amylase regulator)	0.2			14	1	40.317	N
P25144	BSU29740	ccpA	Catabolite control protein A (Glucose-resistance amylase regulator)	0.2			111	1	68.846	N
P25144	BSU29740	ccpA	Catabolite control protein A (Glucose-resistance amylase regulator)	0.2			311	1	103.63	N
P25144	BSU29740	ccpA	Catabolite control protein A (Glucose-resistance amylase regulator)	0.2			3	1	57.598	N
P32397	BSU10140	cgoX	Coproporphyrinogen III oxidase (EC 1.3.3.15)	0.5			167	1	66.613	N
P29072	BSU16430	cheA	Chemotaxis protein CheA (EC 2.7.13.3)	0.3			191	1	58.37	N
P09339	BSU18000	citB	Aconitate/2-methylaconitate hydratase (EC 4.2.1.-) (EC 4.2.1.3) (Aconitate hydratase A) (ACN) (Aconitase) (Iron-responsive protein-like) (IRP-like) (RNA-binding protein)	0.1			152	1	71.143	N
P09339	BSU18000	citB	Aconitate/2-methylaconitate hydratase (EC 4.2.1.-) (EC 4.2.1.3) (Aconitate hydratase A) (ACN) (Aconitase) (Iron-responsive protein-like) (IRP-like) (RNA-binding protein)	0.1			72	1	51.059	N
P50866	BSU28220	clpX	ATP-dependent Clp protease ATP-binding subunit ClpX	0.1			5	1	45.68	N
P50866	BSU28220	clpX	ATP-dependent Clp protease ATP-binding subunit ClpX	0.1			339	1	104.68	N
P50866	BSU28220	clpX	ATP-dependent Clp protease ATP-binding subunit ClpX	0.1			111	1	86.498	N
P50866	BSU28220	clpX	ATP-dependent Clp protease ATP-binding subunit ClpX	0.1			270	1	70.028	N
P39778	BSU16160	clpY	ATP-dependent protease ATPase subunit ClpY	0.2			250	1	75.819	N
P39778	BSU16160	clpY	ATP-dependent protease ATPase subunit ClpY	0.2			119	1	169.04	N
A3F447		cmk	Cytidylate kinase (CK) (EC 2.7.4.25) (Cytidine monophosphate kinase) (CMP kinase)	0.1			169	1	78.505	N
P38493	BSU22890	cmk	Cytidylate kinase (CK) (EC 2.7.4.25) (Cytidine monophosphate kinase) (CMP kinase)	0.1			169	1	78.505	N
P39779	BSU16170	codY	GTP-sensing transcriptional pleiotropic repressor CodY (Vegetative protein 286B) (VEG286B)	0.1			255	1	110.81	N
A9LHR4		cpn60	60 kDa chaperonin (Fragment)	0.1			15	1	115.56	N
A9LHR4		cpn60	60 kDa chaperonin (Fragment)	0.1			39	1	101.52	N
A9LHR4		cpn60	60 kDa chaperonin (Fragment)	0.1			125	1	87.339	N
A9LHR4		cpn60	60 kDa chaperonin (Fragment)	0.1			79	1	233.32	N
P96614	BSU04580	cshA	DEAD-box ATP-dependent RNA helicase CshA (EC 3.6.4.13)	0.1			137	1	55.676	N
P96614	BSU04580	cshA	DEAD-box ATP-dependent RNA helicase CshA (EC 3.6.4.13)	0.1			262	1	100.31	N
P32081	BSU09100	cspB	Cold shock protein CspB (Major cold shock protein)	0.1			10	1	163.84	N
P51777	BSU21930	cspD	Cold shock protein CspD	0.1			55	1	179.64	N
P37887	BSU00730	cysK	Cysteine synthase (CSase) (EC 2.5.1.47) (O-acetylserine (thiol)-lyase) (OAS-TL) (Superoxide-inducible protein 11) (SOI11)	0.1			66	1	98.74	N
P37887	BSU00730	cysK	Cysteine synthase (CSase) (EC 2.5.1.47) (O-acetylserine (thiol)-lyase) (OAS-TL) (Superoxide-inducible protein 11) (SOI11)	0.1			246	1	116.39	N
P37887	BSU00730	cysK	Cysteine synthase (CSase) (EC 2.5.1.47) (O-acetylserine (thiol)-lyase) (OAS-TL) (Superoxide-inducible protein 11) (SOI11)	0.1			27	1	50.484	N
Q06752	BSU00940	cysS	Cysteine--tRNA ligase (EC 6.1.1.16) (Cysteinyl-tRNA synthetase) (CysRS)	0.2			80	1	52.862	N
Q06752	BSU00940	cysS	Cysteine--tRNA ligase (EC 6.1.1.16) (Cysteinyl-tRNA synthetase) (CysRS)	0.2			311	1	99.927	N
Q06752	BSU00940	cysS	Cysteine--tRNA ligase (EC 6.1.1.16) (Cysteinyl-tRNA synthetase) (CysRS)	0.2			450	1	88.78	N
P08750	BSU00100	dacA	D-alanyl-D-alanine carboxypeptidase DacA (CPase) (DD-carboxypeptidase) (DD-peptidase) (EC 3.4.16.4) (Penicillin-binding protein 5) (PBP-5)	0.1			343	1	45.335	N
P08750	BSU00100	dacA	D-alanyl-D-alanine carboxypeptidase DacA (CPase) (DD-carboxypeptidase) (DD-peptidase) (EC 3.4.16.4) (Penicillin-binding protein 5) (PBP-5)	0.1			397	1	45.332	N
P08750	BSU00100	dacA	D-alanyl-D-alanine carboxypeptidase DacA (CPase) (DD-carboxypeptidase) (DD-peptidase) (EC 3.4.16.4) (Penicillin-binding protein 5) (PBP-5)	0.1			309	1	64.121	N
P38422	BSU23480	dacF	D-alanyl-D-alanine carboxypeptidase DacF (DD-carboxypeptidase) (DD-peptidase) (EC 3.4.16.4) (Penicillin-binding protein DacF) (PBP)	0.7			335	1	136.7	N
Q04796	BSU16770	dapA	4-hydroxy-tetrahydrodipicolinate synthase (HTPA synthase) (EC 4.3.3.7)	0.1			135	1	52.453	N
Q04796	BSU16770	dapA	4-hydroxy-tetrahydrodipicolinate synthase (HTPA synthase) (EC 4.3.3.7)	0.1			250	1	47.916	N
Q04796	BSU16770	dapA	4-hydroxy-tetrahydrodipicolinate synthase (HTPA synthase) (EC 4.3.3.7)	0.1			158	1	60.91	N
O34981	BSU14180	dapH	2,3,4,5-tetrahydropyridine-2,6-dicarboxylate N-acetyltransferase (EC 2.3.1.89) (Tetrahydrodipicolinate N-acetyltransferase) (THP acetyltransferase) (Tetrahydropicolinate acetylase)	0.1			200	1	96.54	N
O34981	BSU14180	dapH	2,3,4,5-tetrahydropyridine-2,6-dicarboxylate N-acetyltransferase (EC 2.3.1.89) (Tetrahydrodipicolinate N-acetyltransferase) (THP acetyltransferase) (Tetrahydropicolinate acetylase)	0.1			34	1	99.941	N
O34981	BSU14180	dapH	2,3,4,5-tetrahydropyridine-2,6-dicarboxylate N-acetyltransferase (EC 2.3.1.89) (Tetrahydrodipicolinate N-acetyltransferase) (THP acetyltransferase) (Tetrahydropicolinate acetylase)	0.1			75	1	103.34	N
O34981	BSU14180	dapH	2,3,4,5-tetrahydropyridine-2,6-dicarboxylate N-acetyltransferase (EC 2.3.1.89) (Tetrahydrodipicolinate N-acetyltransferase) (THP acetyltransferase) (Tetrahydropicolinate acetylase)	0.1			7	1	94.007	N
O34981	BSU14180	dapH	2,3,4,5-tetrahydropyridine-2,6-dicarboxylate N-acetyltransferase (EC 2.3.1.89) (Tetrahydrodipicolinate N-acetyltransferase) (THP acetyltransferase) (Tetrahydropicolinate acetylase)	0.1			79	1	81.625	N
P96612	BSU04560	ddl	D-alanine--D-alanine ligase (EC 6.3.2.4) (D-Ala-D-Ala ligase) (D-alanylalanine synthetase)	0.2			24	1	89.903	N
P96612	BSU04560	ddl	D-alanine--D-alanine ligase (EC 6.3.2.4) (D-Ala-D-Ala ligase) (D-alanylalanine synthetase)	0.2			53	1	94.114	N
Q45495	BSU14560	defB	Peptide deformylase 2 (PDF 2) (EC 3.5.1.88) (Polypeptide deformylase 2)	0.1			6	1	76.465	N
P13799	BSU35500	degS	Signal transduction histidine-protein kinase/phosphatase DegS (EC 2.7.13.3) (EC 3.1.3.-)	0.3			304	1	94.804	N
P32436	BSU35480	degV	Protein DegV	0.4			2	1	45.33	N
P39121	BSU39420	deoC	Deoxyribose-phosphate aldolase (DERA) (EC 4.1.2.4) (2-deoxy-D-ribose 5-phosphate aldolase) (Phosphodeoxyriboaldolase) (Deoxyriboaldolase)	0.2			93	1	148	N
P39121	BSU39420	deoC	Deoxyribose-phosphate aldolase (DERA) (EC 4.1.2.4) (2-deoxy-D-ribose 5-phosphate aldolase) (Phosphodeoxyriboaldolase) (Deoxyriboaldolase)	0.2			68	1	73.383	N
O34925	BSU19630	deoD	Purine nucleoside phosphorylase DeoD-type (PNP) (EC 2.4.2.1) (Purine nucleoside phosphorylase II) (PU-NPase II)	0.1			136	1	70.912	N
P50743	BSU22840	der	GTPase Der (GTP-binding protein EngA)	0.3			205	1	127.42	N
P39581	BSU38500	dltA	D-alanine--D-alanyl carrier protein ligase (DCL) (EC 6.2.1.54) (D-alanine--poly(phosphoribitol) ligase subunit 1) (D-alanine-activating enzyme) (DAE)	0.3			221	1	64.803	N
P39581	BSU38500	dltA	D-alanine--D-alanyl carrier protein ligase (DCL) (EC 6.2.1.54) (D-alanine--poly(phosphoribitol) ligase subunit 1) (D-alanine-activating enzyme) (DAE)	0.3			291	1	115.63	N
P39581	BSU38500	dltA	D-alanine--D-alanyl carrier protein ligase (DCL) (EC 6.2.1.54) (D-alanine--poly(phosphoribitol) ligase subunit 1) (D-alanine-activating enzyme) (DAE)	0.3			309	1	114.9	N
P39578	BSU38530	dltD	Protein DltD	0.3			244	1	129.16	N
P39578	BSU38530	dltD	Protein DltD	0.3			199	1	40.724	N
P39577	BSU38540	dltE	Uncharacterized oxidoreductase DltE (EC 1.-.-.-)	0.6			30	1	40.475	N
P17820	BSU25470	dnaK	Chaperone protein DnaK (HSP70) (Heat shock 70 kDa protein) (Heat shock protein 70)	0.1			549	1	128.31	N
P17820	BSU25470	dnaK	Chaperone protein DnaK (HSP70) (Heat shock 70 kDa protein) (Heat shock protein 70)	0.1			595	1	89.634	N
P17820	BSU25470	dnaK	Chaperone protein DnaK (HSP70) (Heat shock 70 kDa protein) (Heat shock protein 70)	0.1			536	1	85.355	N
P17820	BSU25470	dnaK	Chaperone protein DnaK (HSP70) (Heat shock 70 kDa protein) (Heat shock protein 70)	0.1			121	1	110.08	N
P17820	BSU25470	dnaK	Chaperone protein DnaK (HSP70) (Heat shock 70 kDa protein) (Heat shock protein 70)	0.1			492	1	146.88	N
P17820	BSU25470	dnaK	Chaperone protein DnaK (HSP70) (Heat shock 70 kDa protein) (Heat shock protein 70)	0.1			218	1	53.211	N
P17820	BSU25470	dnaK	Chaperone protein DnaK (HSP70) (Heat shock 70 kDa protein) (Heat shock protein 70)	0.1			336	1	112.86	N
P17820	BSU25470	dnaK	Chaperone protein DnaK (HSP70) (Heat shock 70 kDa protein) (Heat shock protein 70)	0.1			507	1	175.74	N
P17820	BSU25470	dnaK	Chaperone protein DnaK (HSP70) (Heat shock 70 kDa protein) (Heat shock protein 70)	0.1			385	1	112.84	N
P17820	BSU25470	dnaK	Chaperone protein DnaK (HSP70) (Heat shock 70 kDa protein) (Heat shock protein 70)	0.1			195	1	77.058	N
P17820	BSU25470	dnaK	Chaperone protein DnaK (HSP70) (Heat shock 70 kDa protein) (Heat shock protein 70)	0.1			13	1	81.144	N
P05649	BSU00020	dnaN	Beta sliding clamp (Beta clamp) (Sliding clamp) (Beta-clamp processivity factor) (DNA polymerase III beta sliding clamp subunit) (DNA polymerase III subunit beta)	0.2			200	1	51.854	N
P05649	BSU00020	dnaN	Beta sliding clamp (Beta clamp) (Sliding clamp) (Beta-clamp processivity factor) (DNA polymerase III beta sliding clamp subunit) (DNA polymerase III subunit beta)	0.2			267	1	51.066	N
P46353	BSU23500	drm	Phosphopentomutase (EC 5.4.2.7) (Phosphodeoxyribomutase)	0.1			7	1	64.776	N
P46353	BSU23500	drm	Phosphopentomutase (EC 5.4.2.7) (Phosphodeoxyribomutase)	0.1			283	1	68.231	N
P49778	BSU24450	efp	Elongation factor P (EF-P)	0.1			5	1	106.04	N
P37869	BSU33900	eno	Enolase (EC 4.2.1.11) (2-phospho-D-glycerate hydro-lyase) (2-phosphoglycerate dehydratase)	0.1			18	1	120.11	N
P37869	BSU33900	eno	Enolase (EC 4.2.1.11) (2-phospho-D-glycerate hydro-lyase) (2-phosphoglycerate dehydratase)	0.1			250	1	91.914	N
P37869	BSU33900	eno	Enolase (EC 4.2.1.11) (2-phospho-D-glycerate hydro-lyase) (2-phosphoglycerate dehydratase)	0.1			109	1	69.729	N
P37869	BSU33900	eno	Enolase (EC 4.2.1.11) (2-phospho-D-glycerate hydro-lyase) (2-phosphoglycerate dehydratase)	0.1			293	1	217.91	N
O34340	BSU11340	fabF	3-oxoacyl-[acyl-carrier-protein] synthase 2 (EC 2.3.1.179) (3-oxoacyl-[acyl-carrier-protein] synthase II) (Beta-ketoacyl-ACP synthase II) (KAS II)	0.1			212	1	109.11	N
O34340	BSU11340	fabF	3-oxoacyl-[acyl-carrier-protein] synthase 2 (EC 2.3.1.179) (3-oxoacyl-[acyl-carrier-protein] synthase II) (Beta-ketoacyl-ACP synthase II) (KAS II)	0.1			157	1	158	N
O34340	BSU11340	fabF	3-oxoacyl-[acyl-carrier-protein] synthase 2 (EC 2.3.1.179) (3-oxoacyl-[acyl-carrier-protein] synthase II) (Beta-ketoacyl-ACP synthase II) (KAS II)	0.1			92	1	109.84	N
P51831	BSU15910	fabG	3-oxoacyl-[acyl-carrier-protein] reductase FabG (EC 1.1.1.100) (3-ketoacyl-acyl carrier protein reductase) (Beta-Ketoacyl-acyl carrier protein reductase) (Beta-ketoacyl-ACP reductase)	0.1			43	1	85.807	N
P51831	BSU15910	fabG	3-oxoacyl-[acyl-carrier-protein] reductase FabG (EC 1.1.1.100) (3-ketoacyl-acyl carrier protein reductase) (Beta-Ketoacyl-acyl carrier protein reductase) (Beta-ketoacyl-ACP reductase)	0.1			96	1	43.626	N
P51831	BSU15910	fabG	3-oxoacyl-[acyl-carrier-protein] reductase FabG (EC 1.1.1.100) (3-ketoacyl-acyl carrier protein reductase) (Beta-Ketoacyl-acyl carrier protein reductase) (Beta-ketoacyl-ACP reductase)	0.1			138	1	102.07	N
P51831	BSU15910	fabG	3-oxoacyl-[acyl-carrier-protein] reductase FabG (EC 1.1.1.100) (3-ketoacyl-acyl carrier protein reductase) (Beta-Ketoacyl-acyl carrier protein reductase) (Beta-ketoacyl-ACP reductase)	0.1			30	1	120.87	N
O34746	BSU11330	fabHA	3-oxoacyl-[acyl-carrier-protein] synthase 3 protein 1 (EC 2.3.1.180) (3-oxoacyl-[acyl-carrier-protein] synthase III protein 1) (Beta-ketoacyl-ACP synthase III 1) (KAS III 1) (bFabH1)	0.2			152	1	97.047	N
O34746	BSU11330	fabHA	3-oxoacyl-[acyl-carrier-protein] synthase 3 protein 1 (EC 2.3.1.180) (3-oxoacyl-[acyl-carrier-protein] synthase III protein 1) (Beta-ketoacyl-ACP synthase III 1) (KAS III 1) (bFabH1)	0.2			267	1	60.939	N
P54616	BSU11720	fabI	Enoyl-[acyl-carrier-protein] reductase [NADH] FabI (ENR) (EC 1.3.1.9) (Cold shock-induced protein 15) (CSI15) (NADH-dependent enoyl-ACP reductase) (Vegetative protein 241) (VEG241)	0.1			120	1	137.05	N
P54616	BSU11720	fabI	Enoyl-[acyl-carrier-protein] reductase [NADH] FabI (ENR) (EC 1.3.1.9) (Cold shock-induced protein 15) (CSI15) (NADH-dependent enoyl-ACP reductase) (Vegetative protein 241) (VEG241)	0.1			206	1	64.82	N
P54616	BSU11720	fabI	Enoyl-[acyl-carrier-protein] reductase [NADH] FabI (ENR) (EC 1.3.1.9) (Cold shock-induced protein 15) (CSI15) (NADH-dependent enoyl-ACP reductase) (Vegetative protein 241) (VEG241)	0.1			246	1	68.567	N
P54616	BSU11720	fabI	Enoyl-[acyl-carrier-protein] reductase [NADH] FabI (ENR) (EC 1.3.1.9) (Cold shock-induced protein 15) (CSI15) (NADH-dependent enoyl-ACP reductase) (Vegetative protein 241) (VEG241)	0.1			2	1	41.876	N
P54616	BSU11720	fabI	Enoyl-[acyl-carrier-protein] reductase [NADH] FabI (ENR) (EC 1.3.1.9) (Cold shock-induced protein 15) (CSI15) (NADH-dependent enoyl-ACP reductase) (Vegetative protein 241) (VEG241)	0.1			187	1	61.765	N
P94584	BSU36370	fabZ	3-hydroxyacyl-[acyl-carrier-protein] dehydratase FabZ (EC 4.2.1.59) ((3R)-hydroxymyristoyl-[acyl-carrier-protein] dehydratase) ((3R)-hydroxymyristoyl-ACP dehydrase) (Beta-hydroxyacyl-ACP dehydratase)	0.2			90	1	54.784	N
P13243	BSU37120	fbaA	Probable fructose-bisphosphate aldolase (FBP aldolase) (FBPA) (EC 4.1.2.13) (Fructose-1,6-bisphosphate aldolase)	0.1			116	1	120.63	N
P13243	BSU37120	fbaA	Probable fructose-bisphosphate aldolase (FBP aldolase) (FBPA) (EC 4.1.2.13) (Fructose-1,6-bisphosphate aldolase)	0.1			189	1	105.24	N
P13243	BSU37120	fbaA	Probable fructose-bisphosphate aldolase (FBP aldolase) (FBPA) (EC 4.1.2.13) (Fructose-1,6-bisphosphate aldolase)	0.1			231	1	174.9	N
P13243	BSU37120	fbaA	Probable fructose-bisphosphate aldolase (FBP aldolase) (FBPA) (EC 4.1.2.13) (Fructose-1,6-bisphosphate aldolase)	0.1			11	1	145.29	N
P37105	BSU15980	ffh	Signal recognition particle protein (Fifty-four homolog)	0.2			214	1	151.71	N
P37105	BSU15980	ffh	Signal recognition particle protein (Fifty-four homolog)	0.2			45	1	50.284	N
P37105	BSU15980	ffh	Signal recognition particle protein (Fifty-four homolog)	0.2			208	1	41.644	N
P37580	BSU33320	fhuD	Iron(3+)-hydroxamate-binding protein FhuD (Ferric hydroxamate uptake protein D) (Ferrichrome-binding protein) (Iron(III)-hydroxamate-binding protein FhuD)	0.1			115	1	66.448	N
P23452	BSU16300	fliL	Flagellar protein FliL	0.2			56	1	46.702	N
P54382	BSU24310	folD	Bifunctional protein FolD [Includes: Methylenetetrahydrofolate dehydrogenase (EC 1.5.1.5); Methenyltetrahydrofolate cyclohydrolase (EC 3.5.4.9)]	0.1			213	1	86.67	N
P54382	BSU24310	folD	Bifunctional protein FolD [Includes: Methylenetetrahydrofolate dehydrogenase (EC 1.5.1.5); Methenyltetrahydrofolate cyclohydrolase (EC 3.5.4.9)]	0.1			232	1	72.325	N
P54382	BSU24310	folD	Bifunctional protein FolD [Includes: Methylenetetrahydrofolate dehydrogenase (EC 1.5.1.5); Methenyltetrahydrofolate cyclohydrolase (EC 3.5.4.9)]	0.1			153	1	61.679	N
P54382	BSU24310	folD	Bifunctional protein FolD [Includes: Methylenetetrahydrofolate dehydrogenase (EC 1.5.1.5); Methenyltetrahydrofolate cyclohydrolase (EC 3.5.4.9)]	0.1			194	1	80.755	N
P81101	BSU16520	frr	Ribosome-recycling factor (RRF) (Ribosome-releasing factor) (Vegetative protein 12B) (VEG12B)	0.1			96	1	77.42	N
P81101	BSU16520	frr	Ribosome-recycling factor (RRF) (Ribosome-releasing factor) (Vegetative protein 12B) (VEG12B)	0.1			33	1	58.815	N
P81101	BSU16520	frr	Ribosome-recycling factor (RRF) (Ribosome-releasing factor) (Vegetative protein 12B) (VEG12B)	0.1			136	1	71.692	N
P81101	BSU16520	frr	Ribosome-recycling factor (RRF) (Ribosome-releasing factor) (Vegetative protein 12B) (VEG12B)	0.1			145	1	104.43	N
P71012	BSU14400	fruA	PTS system fructose-specific EIIABC component (EIIABC-Fru) [Includes: PTS system fructose-specific EIIA component (EII-Fru) (Fructose-specific phosphotransferase enzyme IIA component); PTS system fructose-specific EIIB component (EC 2.7.1.202) (EIII-Fru) (Fructose-specific phosphotransferase enzyme IIB component); PTS system fructose-specific EIIC component (Fructose permease IIC component)]	0.2			15	1	74.415	N
P37476	BSU00690	ftsH	ATP-dependent zinc metalloprotease FtsH (EC 3.4.24.-) (Cell division protease FtsH)	0.1			43	1	120.9	N
O34876	BSU35250	ftsX	Cell division protein FtsX	0.2			137	1	68.548	N
P51835	BSU15950	ftsY	Signal recognition particle receptor FtsY (SRP receptor)	0.2			266	1	58.699	N
P51835	BSU15950	ftsY	Signal recognition particle receptor FtsY (SRP receptor)	0.2			289	1	62.546	N
P51835	BSU15950	ftsY	Signal recognition particle receptor FtsY (SRP receptor)	0.2			38	1	63.301	N
P17865	BSU15290	ftsZ	Cell division protein FtsZ	0.1			166	1	90.827	N
P17865	BSU15290	ftsZ	Cell division protein FtsZ	0.1			74	1	96.82	N
P17865	BSU15290	ftsZ	Cell division protein FtsZ	0.1			235	1	51.727	N
P17865	BSU15290	ftsZ	Cell division protein FtsZ	0.1			176	1	97.579	N
P17865	BSU15290	ftsZ	Cell division protein FtsZ	0.1			7	1	80.632	N
P17865	BSU15290	ftsZ	Cell division protein FtsZ	0.1			208	1	153.65	N
P07343	BSU33040	fumC	Fumarate hydratase class II (Fumarase C) (EC 4.2.1.2) (Aerobic fumarase) (Iron-independent fumarase)	0.1			235	1	118.43	N
P07343	BSU33040	fumC	Fumarate hydratase class II (Fumarase C) (EC 4.2.1.2) (Aerobic fumarase) (Iron-independent fumarase)	0.1			177	1	77.282	N
P07343	BSU33040	fumC	Fumarate hydratase class II (Fumarase C) (EC 4.2.1.2) (Aerobic fumarase) (Iron-independent fumarase)	0.1			291	1	88.029	N
P07343	BSU33040	fumC	Fumarate hydratase class II (Fumarase C) (EC 4.2.1.2) (Aerobic fumarase) (Iron-independent fumarase)	0.1			63	1	97.69	N
P07343	BSU33040	fumC	Fumarate hydratase class II (Fumarase C) (EC 4.2.1.2) (Aerobic fumarase) (Iron-independent fumarase)	0.1			167	1	102.71	N
P07343	BSU33040	fumC	Fumarate hydratase class II (Fumarase C) (EC 4.2.1.2) (Aerobic fumarase) (Iron-independent fumarase)	0.1			31	1	86.086	N
P07343	BSU33040	fumC	Fumarate hydratase class II (Fumarase C) (EC 4.2.1.2) (Aerobic fumarase) (Iron-independent fumarase)	0.1			58	1	96.048	N
P80868	BSU01120	fusA	Elongation factor G (EF-G) (Vegetative protein 19) (VEG19)	0.1			576	1	132.59	N
P80868	BSU01120	fusA	Elongation factor G (EF-G) (Vegetative protein 19) (VEG19)	0.1			596	1	176.83	N
P80868	BSU01120	fusA	Elongation factor G (EF-G) (Vegetative protein 19) (VEG19)	0.1			473	1	114.5	N
P80868	BSU01120	fusA	Elongation factor G (EF-G) (Vegetative protein 19) (VEG19)	0.1			250	1	113.54	N
P80868	BSU01120	fusA	Elongation factor G (EF-G) (Vegetative protein 19) (VEG19)	0.1			295	1	82.362	N
P80868	BSU01120	fusA	Elongation factor G (EF-G) (Vegetative protein 19) (VEG19)	0.1			135	1	99.228	N
P80868	BSU01120	fusA	Elongation factor G (EF-G) (Vegetative protein 19) (VEG19)	0.1			212	1	46.783	N
P80868	BSU01120	fusA	Elongation factor G (EF-G) (Vegetative protein 19) (VEG19)	0.1			660	1	92.467	N
P80868	BSU01120	fusA	Elongation factor G (EF-G) (Vegetative protein 19) (VEG19)	0.1			78	1	189.55	N
P55180	BSU38860	galE	UDP-glucose 4-epimerase (EC 5.1.3.2) (Galactowaldenase) (UDP-galactose 4-epimerase)	0.2			167	1	43.592	N
P09124	BSU33940	gapA	Glyceraldehyde-3-phosphate dehydrogenase 1 (GAPDH) (EC 1.2.1.12) (NAD-dependent glyceraldehyde-3-phosphate dehydrogenase)	0.1			204	1	113.24	N
P09124	BSU33940	gapA	Glyceraldehyde-3-phosphate dehydrogenase 1 (GAPDH) (EC 1.2.1.12) (NAD-dependent glyceraldehyde-3-phosphate dehydrogenase)	0.1			290	1	101.38	N
P09124	BSU33940	gapA	Glyceraldehyde-3-phosphate dehydrogenase 1 (GAPDH) (EC 1.2.1.12) (NAD-dependent glyceraldehyde-3-phosphate dehydrogenase)	0.1			315	1	134.61	N
P09124	BSU33940	gapA	Glyceraldehyde-3-phosphate dehydrogenase 1 (GAPDH) (EC 1.2.1.12) (NAD-dependent glyceraldehyde-3-phosphate dehydrogenase)	0.1			165	1	88.496	N
O06491	BSU06680	gatA	Glutamyl-tRNA(Gln) amidotransferase subunit A (Glu-ADT subunit A) (EC 6.3.5.7)	0.1			353	1	73.248	N
O06491	BSU06680	gatA	Glutamyl-tRNA(Gln) amidotransferase subunit A (Glu-ADT subunit A) (EC 6.3.5.7)	0.1			98	1	115.04	N
O06491	BSU06680	gatA	Glutamyl-tRNA(Gln) amidotransferase subunit A (Glu-ADT subunit A) (EC 6.3.5.7)	0.1			123	1	82.449	N
O06491	BSU06680	gatA	Glutamyl-tRNA(Gln) amidotransferase subunit A (Glu-ADT subunit A) (EC 6.3.5.7)	0.1			242	1	79.69	N
O06491	BSU06680	gatA	Glutamyl-tRNA(Gln) amidotransferase subunit A (Glu-ADT subunit A) (EC 6.3.5.7)	0.1			320	1	125.45	N
O30509	BSU06690	gatB	Aspartyl/glutamyl-tRNA(Asn/Gln) amidotransferase subunit B (Asp/Glu-ADT subunit B) (EC 6.3.5.-)	0.1			67	1	138.91	N
O30509	BSU06690	gatB	Aspartyl/glutamyl-tRNA(Asn/Gln) amidotransferase subunit B (Asp/Glu-ADT subunit B) (EC 6.3.5.-)	0.1			143	1	189.86	N
P71017	BSU31050	gbsB	Choline dehydrogenase (EC 1.1.1.-) (Alcohol dehydrogenase)	0.5			88	1	41.567	N
Q7WY67	BSU19490	gerT	Spore germination protein GerT	0.8			119	1	61.78	N
P54495	BSU24850	glcK	Glucokinase (EC 2.7.1.2) (Glucose kinase)	0.4			227	1	44.848	N
O34824	BSU01770	glmM	Phosphoglucosamine mutase (EC 5.4.2.10)	0.1			287	1	46.461	N
O34824	BSU01770	glmM	Phosphoglucosamine mutase (EC 5.4.2.10)	0.1			435	1	54.7	N
P0CI73	BSU01780	glmS	Glutamine--fructose-6-phosphate aminotransferase [isomerizing] (EC 2.6.1.16) (D-fructose-6-phosphate amidotransferase) (GFAT) (Glucosamine-6-phosphate synthase) (Hexosephosphate aminotransferase) (L-glutamine--D-fructose-6-phosphate amidotransferase)	0.2			372	1	50.108	N
P0CI73	BSU01780	glmS	Glutamine--fructose-6-phosphate aminotransferase [isomerizing] (EC 2.6.1.16) (D-fructose-6-phosphate amidotransferase) (GFAT) (Glucosamine-6-phosphate synthase) (Hexosephosphate aminotransferase) (L-glutamine--D-fructose-6-phosphate amidotransferase)	0.2			61	1	112.11	N
P0CI73	BSU01780	glmS	Glutamine--fructose-6-phosphate aminotransferase [isomerizing] (EC 2.6.1.16) (D-fructose-6-phosphate amidotransferase) (GFAT) (Glucosamine-6-phosphate synthase) (Hexosephosphate aminotransferase) (L-glutamine--D-fructose-6-phosphate amidotransferase)	0.2			538	1	83.862	N
P14192	BSU00500	glmU	Bifunctional protein GlmU [Includes: UDP-N-acetylglucosamine pyrophosphorylase (EC 2.7.7.23) (N-acetylglucosamine-1-phosphate uridyltransferase); Glucosamine-1-phosphate N-acetyltransferase (EC 2.3.1.157)]	0.2			346	1	52.725	N
P14192	BSU00500	glmU	Bifunctional protein GlmU [Includes: UDP-N-acetylglucosamine pyrophosphorylase (EC 2.7.7.23) (N-acetylglucosamine-1-phosphate uridyltransferase); Glucosamine-1-phosphate N-acetyltransferase (EC 2.3.1.157)]	0.2			170	1	87.676	N
P14192	BSU00500	glmU	Bifunctional protein GlmU [Includes: UDP-N-acetylglucosamine pyrophosphorylase (EC 2.7.7.23) (N-acetylglucosamine-1-phosphate uridyltransferase); Glucosamine-1-phosphate N-acetyltransferase (EC 2.3.1.157)]	0.2			208	1	232.79	N
P12425	BSU17460	glnA	Glutamine synthetase (GS) (EC 6.3.1.2) (Glutamate--ammonia ligase) (Glutamine synthetase I alpha) (GSI alpha)	0.1			48	1	164.59	N
P12425	BSU17460	glnA	Glutamine synthetase (GS) (EC 6.3.1.2) (Glutamate--ammonia ligase) (Glutamine synthetase I alpha) (GSI alpha)	0.1			128	1	80.382	N
P12425	BSU17460	glnA	Glutamine synthetase (GS) (EC 6.3.1.2) (Glutamate--ammonia ligase) (Glutamine synthetase I alpha) (GSI alpha)	0.1			98	1	65.175	N
P12425	BSU17460	glnA	Glutamine synthetase (GS) (EC 6.3.1.2) (Glutamate--ammonia ligase) (Glutamine synthetase I alpha) (GSI alpha)	0.1			167	1	40.962	N
P12425	BSU17460	glnA	Glutamine synthetase (GS) (EC 6.3.1.2) (Glutamate--ammonia ligase) (Glutamine synthetase I alpha) (GSI alpha)	0.1			75	1	66.853	N
P12425	BSU17460	glnA	Glutamine synthetase (GS) (EC 6.3.1.2) (Glutamate--ammonia ligase) (Glutamine synthetase I alpha) (GSI alpha)	0.1			151	1	147.51	N
P12425	BSU17460	glnA	Glutamine synthetase (GS) (EC 6.3.1.2) (Glutamate--ammonia ligase) (Glutamine synthetase I alpha) (GSI alpha)	0.1			17	1	101.54	N
P12425	BSU17460	glnA	Glutamine synthetase (GS) (EC 6.3.1.2) (Glutamate--ammonia ligase) (Glutamine synthetase I alpha) (GSI alpha)	0.1			402	1	165.48	N
P12425	BSU17460	glnA	Glutamine synthetase (GS) (EC 6.3.1.2) (Glutamate--ammonia ligase) (Glutamine synthetase I alpha) (GSI alpha)	0.1			371	1	66.073	N
P12425	BSU17460	glnA	Glutamine synthetase (GS) (EC 6.3.1.2) (Glutamate--ammonia ligase) (Glutamine synthetase I alpha) (GSI alpha)	0.1			360	1	94.191	N
P18158	BSU09300	glpD	Aerobic glycerol-3-phosphate dehydrogenase (EC 1.1.5.3)	0.2			511	1	40.352	N
P18158	BSU09300	glpD	Aerobic glycerol-3-phosphate dehydrogenase (EC 1.1.5.3)	0.2			455	1	41.029	N
P18157	BSU09290	glpK	Glycerol kinase (EC 2.7.1.30) (ATP:glycerol 3-phosphotransferase) (Glycerokinase) (GK)	0.3			21	1	54.895	N
P18157	BSU09290	glpK	Glycerol kinase (EC 2.7.1.30) (ATP:glycerol 3-phosphotransferase) (Glycerokinase) (GK)	0.3			399	1	89.466	N
P18157	BSU09290	glpK	Glycerol kinase (EC 2.7.1.30) (ATP:glycerol 3-phosphotransferase) (Glycerokinase) (GK)	0.3			192	1	86.898	N
P18157	BSU09290	glpK	Glycerol kinase (EC 2.7.1.30) (ATP:glycerol 3-phosphotransferase) (Glycerokinase) (GK)	0.3			298	1	95.094	N
P22250	BSU00920	gltX	Glutamate--tRNA ligase (EC 6.1.1.17) (Glutamyl-tRNA synthetase) (GluRS)	0.1			197	1	49.224	N
P22250	BSU00920	gltX	Glutamate--tRNA ligase (EC 6.1.1.17) (Glutamyl-tRNA synthetase) (GluRS)	0.1			307	1	79.82	N
P22250	BSU00920	gltX	Glutamate--tRNA ligase (EC 6.1.1.17) (Glutamyl-tRNA synthetase) (GluRS)	0.1			428	1	51.726	N
P22250	BSU00920	gltX	Glutamate--tRNA ligase (EC 6.1.1.17) (Glutamyl-tRNA synthetase) (GluRS)	0.1			28	1	51.445	N
P54716	BSU08180	glvA	Maltose-6'-phosphate glucosidase (EC 3.2.1.122) (6-phospho-alpha-D-glucosidase) (6-phosphoryl-O-alpha-D-glucopyranosyl:phosphoglucohydrolase)	0.4			334	1	74.301	N
P54716	BSU08180	glvA	Maltose-6'-phosphate glucosidase (EC 3.2.1.122) (6-phospho-alpha-D-glucosidase) (6-phosphoryl-O-alpha-D-glucopyranosyl:phosphoglucohydrolase)	0.4			287	1	66.692	N
P39148	BSU36900	glyA	Serine hydroxymethyltransferase (SHMT) (Serine methylase) (EC 2.1.2.1)	0.1			33	1	100.88	N
P39148	BSU36900	glyA	Serine hydroxymethyltransferase (SHMT) (Serine methylase) (EC 2.1.2.1)	0.1			386	1	110.29	N
P39148	BSU36900	glyA	Serine hydroxymethyltransferase (SHMT) (Serine methylase) (EC 2.1.2.1)	0.1			339	1	77.562	N
P80859	BSU23860	gndA	6-phosphogluconate dehydrogenase, NADP(+)-dependent, decarboxylating (EC 1.1.1.44) (GNTZII)	0.1			349	1	85.533	N
P80859	BSU23860	gndA	6-phosphogluconate dehydrogenase, NADP(+)-dependent, decarboxylating (EC 1.1.1.44) (GNTZII)	0.1			33	1	64.04	N
P80859	BSU23860	gndA	6-phosphogluconate dehydrogenase, NADP(+)-dependent, decarboxylating (EC 1.1.1.44) (GNTZII)	0.1			50	1	101.17	N
P80859	BSU23860	gndA	6-phosphogluconate dehydrogenase, NADP(+)-dependent, decarboxylating (EC 1.1.1.44) (GNTZII)	0.1			396	1	78.342	N
P39773	BSU33910	gpmI	2,3-bisphosphoglycerate-independent phosphoglycerate mutase (BPG-independent PGAM) (Phosphoglyceromutase) (iPGM) (EC 5.4.2.12) (Vegetative protein 107) (VEG107)	0.1			285	1	58.699	N
P39773	BSU33910	gpmI	2,3-bisphosphoglycerate-independent phosphoglycerate mutase (BPG-independent PGAM) (Phosphoglyceromutase) (iPGM) (EC 5.4.2.12) (Vegetative protein 107) (VEG107)	0.1			361	1	94.662	N
P39773	BSU33910	gpmI	2,3-bisphosphoglycerate-independent phosphoglycerate mutase (BPG-independent PGAM) (Phosphoglyceromutase) (iPGM) (EC 5.4.2.12) (Vegetative protein 107) (VEG107)	0.1			83	1	88.591	N
P46919	BSU22830	gpsA	Glycerol-3-phosphate dehydrogenase [NAD(P)+] (EC 1.1.1.94) (NAD(P)H-dependent dihydroxyacetone-phosphate reductase) (NAD(P)H-dependent glycerol-3-phosphate dehydrogenase)	0.3			193	1	103.9	N
P46919	BSU22830	gpsA	Glycerol-3-phosphate dehydrogenase [NAD(P)+] (EC 1.1.1.94) (NAD(P)H-dependent dihydroxyacetone-phosphate reductase) (NAD(P)H-dependent glycerol-3-phosphate dehydrogenase)	0.3			179	1	57.52	N
P80240	BSU27320	greA	Transcription elongation factor GreA (General stress protein 20M) (GSP20M) (Transcript cleavage factor GreA)	0.1			85	1	115.33	N
P80240	BSU27320	greA	Transcription elongation factor GreA (General stress protein 20M) (GSP20M) (Transcript cleavage factor GreA)	0.1			48	1	178.11	N
P80240	BSU27320	greA	Transcription elongation factor GreA (General stress protein 20M) (GSP20M) (Transcript cleavage factor GreA)	0.1			70	1	64.265	N
P28598	BSU06030	groL	60 kDa chaperonin (GroEL protein) (Protein Cpn60) (Stress protein H5)	0.1			67	1	186.87	N
P28598	BSU06030	groL	60 kDa chaperonin (GroEL protein) (Protein Cpn60) (Stress protein H5)	0.1			327	1	152.66	N
P28598	BSU06030	groL	60 kDa chaperonin (GroEL protein) (Protein Cpn60) (Stress protein H5)	0.1			50	1	102.65	N
P28598	BSU06030	groL	60 kDa chaperonin (GroEL protein) (Protein Cpn60) (Stress protein H5)	0.1			270	1	86.67	N
P28598	BSU06030	groL	60 kDa chaperonin (GroEL protein) (Protein Cpn60) (Stress protein H5)	0.1			399	1	85.731	N
P28598	BSU06030	groL	60 kDa chaperonin (GroEL protein) (Protein Cpn60) (Stress protein H5)	0.1			468	1	171.29	N
P28598	BSU06030	groL	60 kDa chaperonin (GroEL protein) (Protein Cpn60) (Stress protein H5)	0.1			484	1	172.98	N
P28598	BSU06030	groL	60 kDa chaperonin (GroEL protein) (Protein Cpn60) (Stress protein H5)	0.1			105	1	115.56	N
P28598	BSU06030	groL	60 kDa chaperonin (GroEL protein) (Protein Cpn60) (Stress protein H5)	0.1			129	1	101.52	N
P28598	BSU06030	groL	60 kDa chaperonin (GroEL protein) (Protein Cpn60) (Stress protein H5)	0.1			215	1	87.339	N
P28598	BSU06030	groL	60 kDa chaperonin (GroEL protein) (Protein Cpn60) (Stress protein H5)	0.1			169	1	233.32	N
Q05852	BSU35670	gtaB	UTP--glucose-1-phosphate uridylyltransferase (EC 2.7.7.9) (Alpha-D-glucosyl-1-phosphate uridylyltransferase) (General stress protein 33) (GSP33) (UDP-glucose pyrophosphorylase) (UDPGP) (Uridine diphosphoglucose pyrophosphorylase)	0.1			200	1	75.294	N
P29727	BSU06360	guaA	GMP synthase [glutamine-hydrolyzing] (EC 6.3.5.2) (GMP synthetase) (Glutamine amidotransferase)	#N/A			111	1	52.5	N
P29727	BSU06360	guaA	GMP synthase [glutamine-hydrolyzing] (EC 6.3.5.2) (GMP synthetase) (Glutamine amidotransferase)	#N/A			425	1	60.167	N
P29727	BSU06360	guaA	GMP synthase [glutamine-hydrolyzing] (EC 6.3.5.2) (GMP synthetase) (Glutamine amidotransferase)	#N/A			182	1	79.07	N
P29727	BSU06360	guaA	GMP synthase [glutamine-hydrolyzing] (EC 6.3.5.2) (GMP synthetase) (Glutamine amidotransferase)	#N/A			304	1	85.146	N
P29727	BSU06360	guaA	GMP synthase [glutamine-hydrolyzing] (EC 6.3.5.2) (GMP synthetase) (Glutamine amidotransferase)	#N/A			490	1	95.957	N
P21879	BSU00090	guaB	Inosine-5'-monophosphate dehydrogenase (IMP dehydrogenase) (IMPD) (IMPDH) (EC 1.1.1.205) (Superoxide-inducible protein 12) (SOI12)	0.1			98	1	84.327	N
P21879	BSU00090	guaB	Inosine-5'-monophosphate dehydrogenase (IMP dehydrogenase) (IMPD) (IMPDH) (EC 1.1.1.205) (Superoxide-inducible protein 12) (SOI12)	0.1			140	1	69.998	N
P21879	BSU00090	guaB	Inosine-5'-monophosphate dehydrogenase (IMP dehydrogenase) (IMPD) (IMPDH) (EC 1.1.1.205) (Superoxide-inducible protein 12) (SOI12)	0.1			43	1	52.909	N
P21879	BSU00090	guaB	Inosine-5'-monophosphate dehydrogenase (IMP dehydrogenase) (IMPD) (IMPDH) (EC 1.1.1.205) (Superoxide-inducible protein 12) (SOI12)	0.1			244	1	89.181	N
P21879	BSU00090	guaB	Inosine-5'-monophosphate dehydrogenase (IMP dehydrogenase) (IMPD) (IMPDH) (EC 1.1.1.205) (Superoxide-inducible protein 12) (SOI12)	0.1			212	1	57.598	N
G0YY35		gyrB	DNA topoisomerase (ATP-hydrolyzing) (EC 5.6.2.2) (Fragment)	0.3			72	1	64.103	N
G0YY35		gyrB	DNA topoisomerase (ATP-hydrolyzing) (EC 5.6.2.2) (Fragment)	0.3			102	1	138.33	N
P05652	BSU00060	gyrB	DNA gyrase subunit B (EC 5.6.2.2)	0.3			204	1	64.103	N
P05652	BSU00060	gyrB	DNA gyrase subunit B (EC 5.6.2.2)	0.3			234	1	138.33	N
P02968	BSU35360	hag	Flagellin (GSX1) (Hag)	0.1			128	1	82.267	N
P02968	BSU35360	hag	Flagellin (GSX1) (Hag)	0.1			205	1	115.53	N
P02968	BSU35360	hag	Flagellin (GSX1) (Hag)	0.1			255	1	166.38	N
P30949	BSU28120	hemL	Glutamate-1-semialdehyde 2,1-aminomutase (GSA) (EC 5.4.3.8) (Glutamate-1-semialdehyde aminotransferase) (GSA-AT)	0.2			351	1	47.915	N
O32039	BSU27560	hisS	Histidine--tRNA ligase (EC 6.1.1.21) (Histidyl-tRNA synthetase) (HisRS)	0.2			229	1	60.034	N
O07513	BSU10030	hit	Protein hit	0.1			52	1	70.529	N
P46208	BSU39820	htpG	Chaperone protein HtpG (Heat shock protein HtpG) (High temperature protein G)	0.2			338	1	95.428	N
P08821	BSU22790	hupA	DNA-binding protein HU 1 (DNA-binding protein II) (HB)	0.1			8	1	63.473	N
P39126	BSU29130	icd	Isocitrate dehydrogenase [NADP] (IDH) (EC 1.1.1.42) (IDP) (NADP(+)-specific ICDH) (Oxalosuccinate decarboxylase)	0.1			146	1	114.64	N
Q45477	BSU15430	ileS	Isoleucine--tRNA ligase (EC 6.1.1.5) (Isoleucyl-tRNA synthetase) (IleRS)	0.1			901	1	79.146	N
Q45477	BSU15430	ileS	Isoleucine--tRNA ligase (EC 6.1.1.5) (Isoleucyl-tRNA synthetase) (IleRS)	0.1			370	1	82.765	N
Q45477	BSU15430	ileS	Isoleucine--tRNA ligase (EC 6.1.1.5) (Isoleucyl-tRNA synthetase) (IleRS)	0.1			442	1	50.31	N
Q45477	BSU15430	ileS	Isoleucine--tRNA ligase (EC 6.1.1.5) (Isoleucyl-tRNA synthetase) (IleRS)	0.1			829	1	134.66	N
Q45477	BSU15430	ileS	Isoleucine--tRNA ligase (EC 6.1.1.5) (Isoleucyl-tRNA synthetase) (IleRS)	0.1			666	1	89.827	N
P17889	BSU16630	infB	Translation initiation factor IF-2	0.1			326	1	78.096	N
P17889	BSU16630	infB	Translation initiation factor IF-2	0.1			334	1	45.653	N
P17889	BSU16630	infB	Translation initiation factor IF-2	0.1			590	1	136.96	N
P55872	BSU28870	infC	Translation initiation factor IF-3	0.1			43	1	76.151	N
P55872	BSU28870	infC	Translation initiation factor IF-3	0.1			101	1	67.115	N
P46336	BSU39780	iolS	Aldo-keto reductase IolS (EC 1.1.1.-) (AKR11A) (Vegetative protein 147) (VEG147)	0.2			166	1	127.22	N
O05265	BSU31170	iolU	scyllo-inositol 2-dehydrogenase (NADP(+)) IolU (EC 1.1.1.371) (NADP(+)-dependent scyllo-inositol dehydrogenase 2) (NADP(+)-dependent SI dehydrogenase 2)	0.3			10	1	61.344	N
O32223	BSU33530	iolW	scyllo-inositol 2-dehydrogenase (NADP(+)) IolW (EC 1.1.1.371) (NADP(+)-dependent scyllo-inositol dehydrogenase 1) (NADP(+)-dependent SI dehydrogenase 1)	0.2			336	1	66.826	N
P54482	BSU25070	ispG	4-hydroxy-3-methylbut-2-en-1-yl diphosphate synthase (flavodoxin) (EC 1.17.7.3) (1-hydroxy-2-methyl-2-(E)-butenyl 4-diphosphate synthase)	0.2			70	1	83.948	N
P54482	BSU25070	ispG	4-hydroxy-3-methylbut-2-en-1-yl diphosphate synthase (flavodoxin) (EC 1.17.7.3) (1-hydroxy-2-methyl-2-(E)-butenyl 4-diphosphate synthase)	0.2			186	1	46.844	N
P54482	BSU25070	ispG	4-hydroxy-3-methylbut-2-en-1-yl diphosphate synthase (flavodoxin) (EC 1.17.7.3) (1-hydroxy-2-methyl-2-(E)-butenyl 4-diphosphate synthase)	0.2			285	1	57.936	N
P54482	BSU25070	ispG	4-hydroxy-3-methylbut-2-en-1-yl diphosphate synthase (flavodoxin) (EC 1.17.7.3) (1-hydroxy-2-methyl-2-(E)-butenyl 4-diphosphate synthase)	0.2			263	1	44.382	N
P54482	BSU25070	ispG	4-hydroxy-3-methylbut-2-en-1-yl diphosphate synthase (flavodoxin) (EC 1.17.7.3) (1-hydroxy-2-methyl-2-(E)-butenyl 4-diphosphate synthase)	0.2			49	1	84.718	N
P13714	BSU03050	ldh	L-lactate dehydrogenase (L-LDH) (EC 1.1.1.27)	0.1			51	1	88.021	N
P13714	BSU03050	ldh	L-lactate dehydrogenase (L-LDH) (EC 1.1.1.27)	0.1			220	1	74.849	N
P37949	BSU25510	lepA	Elongation factor 4 (EF-4) (EC 3.6.5.n1) (Ribosomal back-translocase LepA)	0.3			438	1	120.84	N
P36430	BSU30320	leuS	Leucine--tRNA ligase (EC 6.1.1.4) (Leucyl-tRNA synthetase) (LeuRS)	0.2			804	1	86.113	N
P36430	BSU30320	leuS	Leucine--tRNA ligase (EC 6.1.1.4) (Leucyl-tRNA synthetase) (LeuRS)	0.2			467	1	154.46	N
P31080	BSU17850	lexA	LexA repressor (EC 3.4.21.88) (SOS regulatory protein DinR)	0.2			100	1	44.341	N
O31498	BSU06620	ligA	DNA ligase (EC 6.5.1.2) (Polydeoxyribonucleotide synthase [NAD(+)])	0.3			461	1	92.112	N
O32129	BSU32330	lipA	Lipoyl synthase (EC 2.8.1.8) (Lip-syn) (LS) (Lipoate synthase) (Lipoic acid synthase) (Sulfur insertion protein LipA)	0.2			100	1	69.598	N
O07608	BSU10250	lplJ	Lipoate-protein ligase LplJ (EC 6.3.1.20) (Lipoate--protein ligase)	0.3			15	1	69.451	N
O07020	BSU34050	lutA	Lactate utilization protein A	0.2			116	1	50.215	N
O07021	BSU34040	lutB	Lactate utilization protein B	0.2			301	1	148.57	N
P23630	BSU23380	lysA	Diaminopimelate decarboxylase (DAP decarboxylase) (DAPDC) (EC 4.1.1.20)	0.2			344	1	72.138	N
P37477	BSU00820	lysS	Lysine--tRNA ligase (EC 6.1.1.6) (Lysyl-tRNA synthetase) (LysRS)	0.2			446	1	67.571	N
P37477	BSU00820	lysS	Lysine--tRNA ligase (EC 6.1.1.6) (Lysyl-tRNA synthetase) (LysRS)	0.2			420	1	169.94	N
P37477	BSU00820	lysS	Lysine--tRNA ligase (EC 6.1.1.6) (Lysyl-tRNA synthetase) (LysRS)	0.2			483	1	92.112	N
P37477	BSU00820	lysS	Lysine--tRNA ligase (EC 6.1.1.6) (Lysyl-tRNA synthetase) (LysRS)	0.2			260	1	41.029	N
P37477	BSU00820	lysS	Lysine--tRNA ligase (EC 6.1.1.6) (Lysyl-tRNA synthetase) (LysRS)	0.2			128	1	43.419	N
P37477	BSU00820	lysS	Lysine--tRNA ligase (EC 6.1.1.6) (Lysyl-tRNA synthetase) (LysRS)	0.2			173	1	118.03	N
O31645	BSU12010	manP	PTS system mannose-specific EIIBCA component (EIIBCA-Man) (EII-Man) [Includes: Mannose-specific phosphotransferase enzyme IIB component (EC 2.7.1.191) (PTS system mannose-specific EIIB component); Mannose permease IIC component (PTS system mannose-specific EIIC component); Mannose-specific phosphotransferase enzyme IIA component (PTS system mannose-specific EIIA component)]	0.4			68	1	43	N
P19994	BSU01380	map	Methionine aminopeptidase 1 (MAP 1) (MetAP 1) (EC 3.4.11.18) (Peptidase M)	0.2			217	1	76.759	N
P39751	BSU36410	mbl	Cell shape-determining protein Mbl (Actin-like Mbl protein) (Rod shape-determining protein Mbl)	0.1			14	1	115.33	N
P39751	BSU36410	mbl	Cell shape-determining protein Mbl (Actin-like Mbl protein) (Rod shape-determining protein Mbl)	0.1			27	1	78.814	N
P39751	BSU36410	mbl	Cell shape-determining protein Mbl (Actin-like Mbl protein) (Rod shape-determining protein Mbl)	0.1			240	1	81.297	N
P49814	BSU29120	mdh	Malate dehydrogenase (EC 1.1.1.37) (Vegetative protein 69) (VEG69)	0.1			100	1	80.438	N
P49814	BSU29120	mdh	Malate dehydrogenase (EC 1.1.1.37) (Vegetative protein 69) (VEG69)	0.1			69	1	136.77	N
P49814	BSU29120	mdh	Malate dehydrogenase (EC 1.1.1.37) (Vegetative protein 69) (VEG69)	0.1			166	1	85.522	N
P49814	BSU29120	mdh	Malate dehydrogenase (EC 1.1.1.37) (Vegetative protein 69) (VEG69)	0.1			125	1	66.137	N
P37958	BSU11520	mecA	Adapter protein MecA 1	0.3			159	1	60.563	N
P37465	BSU00380	metG	Methionine--tRNA ligase (EC 6.1.1.10) (Methionyl-tRNA synthetase) (MetRS)	0.2			360	1	135.02	N
P37465	BSU00380	metG	Methionine--tRNA ligase (EC 6.1.1.10) (Methionyl-tRNA synthetase) (MetRS)	0.2			435	1	105.39	N
P37465	BSU00380	metG	Methionine--tRNA ligase (EC 6.1.1.10) (Methionyl-tRNA synthetase) (MetRS)	0.2			379	1	57.103	N
P54419	BSU30550	metK	S-adenosylmethionine synthase (AdoMet synthase) (EC 2.5.1.6) (MAT) (Methionine adenosyltransferase)	0.1			142	1	174.4	N
P54419	BSU30550	metK	S-adenosylmethionine synthase (AdoMet synthase) (EC 2.5.1.6) (MAT) (Methionine adenosyltransferase)	0.1			240	1	117.08	N
P54419	BSU30550	metK	S-adenosylmethionine synthase (AdoMet synthase) (EC 2.5.1.6) (MAT) (Methionine adenosyltransferase)	0.1			39	1	48.761	N
O32169	BSU32750	metN	Methionine import ATP-binding protein MetN (EC 7.4.2.11)	0.2			102	1	49.298	N
O32169	BSU32750	metN	Methionine import ATP-binding protein MetN (EC 7.4.2.11)	0.2			52	1	52.683	N
O32167	BSU32730	metQ	Methionine-binding lipoprotein MetQ	0.1			151	1	60.549	N
Q01464	BSU27990	minD	Septum site-determining protein MinD (Cell division inhibitor MinD)	0.2			131	1	50.04	N
O35020	BSU27500	mnmA	tRNA-specific 2-thiouridylase MnmA (EC 2.8.1.13)	0.4			288	1	45.598	N
P25812	BSU41010	mnmG	tRNA uridine 5-carboxymethylaminomethyl modification enzyme MnmG (Glucose-inhibited division protein A)	0.2			423	1	45.081	N
O34385	BSU30770	mntA	Manganese-binding lipoprotein MntA	0.4			256	1	80.231	N
Q01465	BSU28030	mreB	Cell shape-determining protein MreB (Actin-like MreB protein) (Rod shape-determining protein MreB)	0.2			17	1	119.39	N
Q01465	BSU28030	mreB	Cell shape-determining protein MreB (Actin-like MreB protein) (Rod shape-determining protein MreB)	0.2			226	1	101.05	N
Q01465	BSU28030	mreB	Cell shape-determining protein MreB (Actin-like MreB protein) (Rod shape-determining protein MreB)	0.2			61	1	53.567	N
Q01465	BSU28030	mreB	Cell shape-determining protein MreB (Actin-like MreB protein) (Rod shape-determining protein MreB)	0.2			193	1	80.763	N
Q01466	BSU28020	mreC	Cell shape-determining protein MreC (Cell shape protein MreC) (Rod shape-determining protein MreC)	0.2			96	1	78.149	N
P94585	BSU36360	mscL	Large-conductance mechanosensitive channel	0.2			91	1	49.312	N
P54155	BSU21680	msrB	Peptide methionine sulfoxide reductase MsrB (EC 1.8.4.12) (Peptide-methionine (R)-S-oxide reductase)	0.3			4	1	43.124	N
O32028	BSU27270	mtnN	5'-methylthioadenosine/S-adenosylhomocysteine nucleosidase (MTA/SAH nucleosidase) (MTAN) (EC 3.2.2.9) (5'-deoxyadenosine nucleosidase) (DOA nucleosidase) (dAdo nucleosidase) (5'-methylthioadenosine nucleosidase) (MTA nucleosidase) (S-adenosylhomocysteine nucleosidase) (AdoHcy nucleosidase) (SAH nucleosidase) (SRH nucleosidase)	0.2			54	1	85.42	N
A3F3E0		mtrB	Transcription attenuation protein MtrB (Trp RNA-binding attenuation protein) (TRAP) (Tryptophan RNA-binding attenuator protein)	0.1			20	1	51.546	N
P19466	BSU22770	mtrB	Transcription attenuation protein MtrB (Trp RNA-binding attenuation protein) (TRAP) (Tryptophan RNA-binding attenuator protein)	0.1			20	1	51.546	N
P70965	BSU36760	murAA	UDP-N-acetylglucosamine 1-carboxyvinyltransferase 1 (EC 2.5.1.7) (Enoylpyruvate transferase 1) (UDP-N-acetylglucosamine enolpyruvyl transferase 1) (EPT 1)	0.3			331	1	104.7	N
P70965	BSU36760	murAA	UDP-N-acetylglucosamine 1-carboxyvinyltransferase 1 (EC 2.5.1.7) (Enoylpyruvate transferase 1) (UDP-N-acetylglucosamine enolpyruvyl transferase 1) (EPT 1)	0.3			23	1	76.378	N
P70965	BSU36760	murAA	UDP-N-acetylglucosamine 1-carboxyvinyltransferase 1 (EC 2.5.1.7) (Enoylpyruvate transferase 1) (UDP-N-acetylglucosamine enolpyruvyl transferase 1) (EPT 1)	0.3			55	1	141.18	N
P70965	BSU36760	murAA	UDP-N-acetylglucosamine 1-carboxyvinyltransferase 1 (EC 2.5.1.7) (Enoylpyruvate transferase 1) (UDP-N-acetylglucosamine enolpyruvyl transferase 1) (EPT 1)	0.3			142	1	57.225	N
P70965	BSU36760	murAA	UDP-N-acetylglucosamine 1-carboxyvinyltransferase 1 (EC 2.5.1.7) (Enoylpyruvate transferase 1) (UDP-N-acetylglucosamine enolpyruvyl transferase 1) (EPT 1)	0.3			418	1	164.48	N
P18579	BSU15230	murB	UDP-N-acetylenolpyruvoylglucosamine reductase (EC 1.3.1.98) (UDP-N-acetylmuramate dehydrogenase)	0.2			68	1	50.088	N
Q03523	BSU15180	murE	UDP-N-acetylmuramoyl-L-alanyl-D-glutamate--2,6-diaminopimelate ligase (EC 6.3.2.13) (Meso-A2pm-adding enzyme) (Meso-diaminopimelate-adding enzyme) (UDP-MurNAc-L-Ala-D-Glu:meso-diaminopimelate ligase) (UDP-MurNAc-tripeptide synthetase) (UDP-N-acetylmuramyl-tripeptide synthetase)	0.3			488	1	90.706	N
Q03523	BSU15180	murE	UDP-N-acetylmuramoyl-L-alanyl-D-glutamate--2,6-diaminopimelate ligase (EC 6.3.2.13) (Meso-A2pm-adding enzyme) (Meso-diaminopimelate-adding enzyme) (UDP-MurNAc-L-Ala-D-Glu:meso-diaminopimelate ligase) (UDP-MurNAc-tripeptide synthetase) (UDP-N-acetylmuramyl-tripeptide synthetase)	0.3			240	1	60.918	N
Q03523	BSU15180	murE	UDP-N-acetylmuramoyl-L-alanyl-D-glutamate--2,6-diaminopimelate ligase (EC 6.3.2.13) (Meso-A2pm-adding enzyme) (Meso-diaminopimelate-adding enzyme) (UDP-MurNAc-L-Ala-D-Glu:meso-diaminopimelate ligase) (UDP-MurNAc-tripeptide synthetase) (UDP-N-acetylmuramyl-tripeptide synthetase)	0.3			74	1	53.237	N
A3F3D6		ndk	Nucleoside diphosphate kinase (NDK) (NDP kinase) (EC 2.7.4.6) (Nucleoside-2-P kinase)	0.1			129	1	57.463	N
P31103	BSU22730	ndk	Nucleoside diphosphate kinase (NDK) (NDP kinase) (EC 2.7.4.6) (Nucleoside-2-P kinase)	0.1			129	1	57.463	N
P54476	BSU25130	nfo	Probable endonuclease 4 (EC 3.1.21.2) (Endodeoxyribonuclease IV) (Endonuclease IV)	0.4			50	1	57.164	N
P50620	BSU17380	nrdE	Ribonucleoside-diphosphate reductase subunit alpha (EC 1.17.4.1) (Ribonucleotide reductase large subunit)	0.2			259	1	99.752	N
P50620	BSU17380	nrdE	Ribonucleoside-diphosphate reductase subunit alpha (EC 1.17.4.1) (Ribonucleotide reductase large subunit)	0.2			102	1	46.129	N
P50620	BSU17380	nrdE	Ribonucleoside-diphosphate reductase subunit alpha (EC 1.17.4.1) (Ribonucleotide reductase large subunit)	0.2			232	1	66.682	N
O31875	BSU20060	nrdEB	Ribonucleoside-diphosphate reductase NrdEB subunit alpha (EC 1.17.4.1) (Ribonucleotide reductase large subunit) [Cleaved into: Bsu nrdEB intein]	0.7			101	1	46.129	N
O31875	BSU20060	nrdEB	Ribonucleoside-diphosphate reductase NrdEB subunit alpha (EC 1.17.4.1) (Ribonucleotide reductase large subunit) [Cleaved into: Bsu nrdEB intein]	0.7			231	1	66.682	N
P32727	BSU16600	nusA	Transcription termination/antitermination protein NusA	0.1			274	1	113.73	N
P32727	BSU16600	nusA	Transcription termination/antitermination protein NusA	0.1			285	1	89.365	N
P32727	BSU16600	nusA	Transcription termination/antitermination protein NusA	0.1			147	1	77.776	N
P32727	BSU16600	nusA	Transcription termination/antitermination protein NusA	0.1			298	1	94.82	N
Q06795	BSU01010	nusG	Transcription termination/antitermination protein NusG	0.1			139	1	55.588	N
P20964	BSU27920	obg	GTPase Obg (EC 3.6.5.-) (GTP-binding protein Obg) (OrfA) (Spo0B-associated GTP-binding protein)	0.3			196	1	71.148	N
P23129	BSU19370	odhA	2-oxoglutarate dehydrogenase E1 component (EC 1.2.4.2) (Alpha-ketoglutarate dehydrogenase)	#N/A			302	1	54.056	N
P16263	BSU19360	odhB	Dihydrolipoyllysine-residue succinyltransferase component of 2-oxoglutarate dehydrogenase complex (EC 2.3.1.61) (2-oxoglutarate dehydrogenase complex component E2) (OGDC-E2) (Dihydrolipoamide succinyltransferase component of 2-oxoglutarate dehydrogenase complex)	0.1			405	1	91.914	N
P24141	BSU11430	oppA	Oligopeptide-binding protein OppA (Stage 0 sporulation protein KA)	0.1			151	1	62.107	N
P24141	BSU11430	oppA	Oligopeptide-binding protein OppA (Stage 0 sporulation protein KA)	0.1			78	1	61.097	N
O34714	BSU33240	oxdC	Oxalate decarboxylase OxdC (EC 4.1.1.2)	0.3			250	1	43.246	N
P52998	BSU22420	panC	Pantothenate synthetase (PS) (EC 6.3.2.1) (Pantoate--beta-alanine ligase) (Pantoate-activating enzyme)	0.3			275	1	71.889	N
P54418	BSU30560	pckA	Phosphoenolpyruvate carboxykinase (ATP) (PCK) (PEP carboxykinase) (PEPCK) (EC 4.1.1.49)	0.2			297	1	91.355	N
O34790	BSU06600	pcrB	Heptaprenylglyceryl phosphate synthase (HepGP synthase) (EC 2.5.1.n9) (Glycerol-1-phosphate heptaprenyltransferase)	0.5			16	1	62.717	N
P21881	BSU14580	pdhA	Pyruvate dehydrogenase E1 component subunit alpha (EC 1.2.4.1) (S complex, 42 kDa subunit) (Vegetative protein 220) (VEG220)	0.1			308	1	117.7	N
P21881	BSU14580	pdhA	Pyruvate dehydrogenase E1 component subunit alpha (EC 1.2.4.1) (S complex, 42 kDa subunit) (Vegetative protein 220) (VEG220)	0.1			257	1	140.96	N
P21881	BSU14580	pdhA	Pyruvate dehydrogenase E1 component subunit alpha (EC 1.2.4.1) (S complex, 42 kDa subunit) (Vegetative protein 220) (VEG220)	0.1			291	1	155.2	N
P21881	BSU14580	pdhA	Pyruvate dehydrogenase E1 component subunit alpha (EC 1.2.4.1) (S complex, 42 kDa subunit) (Vegetative protein 220) (VEG220)	0.1			37	1	152.06	N
P21881	BSU14580	pdhA	Pyruvate dehydrogenase E1 component subunit alpha (EC 1.2.4.1) (S complex, 42 kDa subunit) (Vegetative protein 220) (VEG220)	0.1			357	1	190.11	N
P21881	BSU14580	pdhA	Pyruvate dehydrogenase E1 component subunit alpha (EC 1.2.4.1) (S complex, 42 kDa subunit) (Vegetative protein 220) (VEG220)	0.1			70	1	93.593	N
P21882	BSU14590	pdhB	Pyruvate dehydrogenase E1 component subunit beta (EC 1.2.4.1) (S complex, 36 kDa subunit)	0.1			165	1	147.26	N
P21882	BSU14590	pdhB	Pyruvate dehydrogenase E1 component subunit beta (EC 1.2.4.1) (S complex, 36 kDa subunit)	0.1			278	1	130.47	N
P21883	BSU14600	pdhC	Dihydrolipoyllysine-residue acetyltransferase component of pyruvate dehydrogenase complex (EC 2.3.1.12) (Dihydrolipoamide acetyltransferase component of pyruvate dehydrogenase complex) (E2) (S complex, 48 kDa subunit)	0.1			230	1	89.903	N
P21883	BSU14600	pdhC	Dihydrolipoyllysine-residue acetyltransferase component of pyruvate dehydrogenase complex (EC 2.3.1.12) (Dihydrolipoamide acetyltransferase component of pyruvate dehydrogenase complex) (E2) (S complex, 48 kDa subunit)	0.1			137	1	136.27	N
P21883	BSU14600	pdhC	Dihydrolipoyllysine-residue acetyltransferase component of pyruvate dehydrogenase complex (EC 2.3.1.12) (Dihydrolipoamide acetyltransferase component of pyruvate dehydrogenase complex) (E2) (S complex, 48 kDa subunit)	0.1			288	1	194.19	N
P21883	BSU14600	pdhC	Dihydrolipoyllysine-residue acetyltransferase component of pyruvate dehydrogenase complex (EC 2.3.1.12) (Dihydrolipoamide acetyltransferase component of pyruvate dehydrogenase complex) (E2) (S complex, 48 kDa subunit)	0.1			362	1	188.15	N
P21883	BSU14600	pdhC	Dihydrolipoyllysine-residue acetyltransferase component of pyruvate dehydrogenase complex (EC 2.3.1.12) (Dihydrolipoamide acetyltransferase component of pyruvate dehydrogenase complex) (E2) (S complex, 48 kDa subunit)	0.1			305	1	131.83	N
P21883	BSU14600	pdhC	Dihydrolipoyllysine-residue acetyltransferase component of pyruvate dehydrogenase complex (EC 2.3.1.12) (Dihydrolipoamide acetyltransferase component of pyruvate dehydrogenase complex) (E2) (S complex, 48 kDa subunit)	0.1			337	1	51.252	N
P21880	BSU14610	pdhD	Dihydrolipoyl dehydrogenase (EC 1.8.1.4) (Dihydrolipoamide dehydrogenase) (E3 component of pyruvate complex) (S complex, 50 kDa subunit)	0.1			60	1	50.127	N
P21880	BSU14610	pdhD	Dihydrolipoyl dehydrogenase (EC 1.8.1.4) (Dihydrolipoamide dehydrogenase) (E3 component of pyruvate complex) (S complex, 50 kDa subunit)	0.1			393	1	190.96	N
P21880	BSU14610	pdhD	Dihydrolipoyl dehydrogenase (EC 1.8.1.4) (Dihydrolipoamide dehydrogenase) (E3 component of pyruvate complex) (S complex, 50 kDa subunit)	0.1			97	1	86.935	N
P21880	BSU14610	pdhD	Dihydrolipoyl dehydrogenase (EC 1.8.1.4) (Dihydrolipoamide dehydrogenase) (E3 component of pyruvate complex) (S complex, 50 kDa subunit)	0.1			49	1	106.19	N
P21880	BSU14610	pdhD	Dihydrolipoyl dehydrogenase (EC 1.8.1.4) (Dihydrolipoamide dehydrogenase) (E3 component of pyruvate complex) (S complex, 50 kDa subunit)	0.1			125	1	131.67	N
P21880	BSU14610	pdhD	Dihydrolipoyl dehydrogenase (EC 1.8.1.4) (Dihydrolipoamide dehydrogenase) (E3 component of pyruvate complex) (S complex, 50 kDa subunit)	0.1			110	1	76.221	N
P21880	BSU14610	pdhD	Dihydrolipoyl dehydrogenase (EC 1.8.1.4) (Dihydrolipoamide dehydrogenase) (E3 component of pyruvate complex) (S complex, 50 kDa subunit)	0.1			238	1	103.97	N
P21880	BSU14610	pdhD	Dihydrolipoyl dehydrogenase (EC 1.8.1.4) (Dihydrolipoamide dehydrogenase) (E3 component of pyruvate complex) (S complex, 50 kDa subunit)	0.1			80	1	229.02	N
P21880	BSU14610	pdhD	Dihydrolipoyl dehydrogenase (EC 1.8.1.4) (Dihydrolipoamide dehydrogenase) (E3 component of pyruvate complex) (S complex, 50 kDa subunit)	0.1			142	1	115.29	N
P21880	BSU14610	pdhD	Dihydrolipoyl dehydrogenase (EC 1.8.1.4) (Dihydrolipoamide dehydrogenase) (E3 component of pyruvate complex) (S complex, 50 kDa subunit)	0.1			156	1	76.391	N
P21880	BSU14610	pdhD	Dihydrolipoyl dehydrogenase (EC 1.8.1.4) (Dihydrolipoamide dehydrogenase) (E3 component of pyruvate complex) (S complex, 50 kDa subunit)	0.1			165	1	121.5	N
P21880	BSU14610	pdhD	Dihydrolipoyl dehydrogenase (EC 1.8.1.4) (Dihydrolipoamide dehydrogenase) (E3 component of pyruvate complex) (S complex, 50 kDa subunit)	0.1			133	1	190.36	N
P39142	BSU39400	pdp	Pyrimidine-nucleoside phosphorylase (PYNP) (Py-NPase) (EC 2.4.2.2)	0.2			64	1	73.672	N
P39142	BSU39400	pdp	Pyrimidine-nucleoside phosphorylase (PYNP) (Py-NPase) (EC 2.4.2.2)	0.2			414	1	84.359	N
P37527	BSU00110	pdxS	Pyridoxal 5'-phosphate synthase subunit PdxS (PLP synthase subunit PdxS) (EC 4.3.3.6) (Pdx1) (Superoxide-inducible protein 7) (SOI7)	0.1			72	1	50.957	N
P37527	BSU00110	pdxS	Pyridoxal 5'-phosphate synthase subunit PdxS (PLP synthase subunit PdxS) (EC 4.3.3.6) (Pdx1) (Superoxide-inducible protein 7) (SOI7)	0.1			156	1	47.548	N
O34529	BSU29190	pfkA	ATP-dependent 6-phosphofructokinase (ATP-PFK) (Phosphofructokinase) (EC 2.7.1.11) (Phosphohexokinase)	0.1			88	1	45.489	N
O34529	BSU29190	pfkA	ATP-dependent 6-phosphofructokinase (ATP-PFK) (Phosphofructokinase) (EC 2.7.1.11) (Phosphohexokinase)	0.1			239	1	112.3	N
O34529	BSU29190	pfkA	ATP-dependent 6-phosphofructokinase (ATP-PFK) (Phosphofructokinase) (EC 2.7.1.11) (Phosphohexokinase)	0.1			17	1	97.579	N
P18159	BSU09310	pgcA	Phosphoglucomutase (PGM) (EC 5.4.2.2) (Alpha-phosphoglucomutase) (Glucose phosphomutase)	#N/A			58	1	90.15	N
P80860	BSU31350	pgi	Glucose-6-phosphate isomerase (GPI) (EC 5.3.1.9) (Phosphoglucose isomerase) (PGI) (Phosphohexose isomerase) (PHI) (Vegetative protein 54) (VEG54)	0.1			16	1	76.01	N
P80860	BSU31350	pgi	Glucose-6-phosphate isomerase (GPI) (EC 5.3.1.9) (Phosphoglucose isomerase) (PGI) (Phosphohexose isomerase) (PHI) (Vegetative protein 54) (VEG54)	0.1			330	1	131.53	N
P80860	BSU31350	pgi	Glucose-6-phosphate isomerase (GPI) (EC 5.3.1.9) (Phosphoglucose isomerase) (PGI) (Phosphohexose isomerase) (PHI) (Vegetative protein 54) (VEG54)	0.1			345	1	193.06	N
P80860	BSU31350	pgi	Glucose-6-phosphate isomerase (GPI) (EC 5.3.1.9) (Phosphoglucose isomerase) (PGI) (Phosphohexose isomerase) (PHI) (Vegetative protein 54) (VEG54)	0.1			258	1	122.17	N
P80860	BSU31350	pgi	Glucose-6-phosphate isomerase (GPI) (EC 5.3.1.9) (Phosphoglucose isomerase) (PGI) (Phosphohexose isomerase) (PHI) (Vegetative protein 54) (VEG54)	0.1			191	1	128.05	N
P80860	BSU31350	pgi	Glucose-6-phosphate isomerase (GPI) (EC 5.3.1.9) (Phosphoglucose isomerase) (PGI) (Phosphohexose isomerase) (PHI) (Vegetative protein 54) (VEG54)	0.1			362	1	70.919	N
P80860	BSU31350	pgi	Glucose-6-phosphate isomerase (GPI) (EC 5.3.1.9) (Phosphoglucose isomerase) (PGI) (Phosphohexose isomerase) (PHI) (Vegetative protein 54) (VEG54)	0.1			427	1	61.165	N
P80860	BSU31350	pgi	Glucose-6-phosphate isomerase (GPI) (EC 5.3.1.9) (Phosphoglucose isomerase) (PGI) (Phosphohexose isomerase) (PHI) (Vegetative protein 54) (VEG54)	0.1			225	1	83.082	N
P40924	BSU33930	pgk	Phosphoglycerate kinase (EC 2.7.2.3)	0.1			143	1	140.28	N
P40924	BSU33930	pgk	Phosphoglycerate kinase (EC 2.7.2.3)	0.1			116	1	80.834	N
P40924	BSU33930	pgk	Phosphoglycerate kinase (EC 2.7.2.3)	0.1			184	1	89.468	N
P40924	BSU33930	pgk	Phosphoglycerate kinase (EC 2.7.2.3)	0.1			392	1	64.82	N
P40924	BSU33930	pgk	Phosphoglycerate kinase (EC 2.7.2.3)	0.1			126	1	65.472	N
P40924	BSU33930	pgk	Phosphoglycerate kinase (EC 2.7.2.3)	0.1			23	1	100.02	N
P40924	BSU33930	pgk	Phosphoglycerate kinase (EC 2.7.2.3)	0.1			214	1	40.52	N
O34499	BSU13010	pgl	6-phosphogluconolactonase (EC 3.1.1.31)	0.1			263	1	74.597	N
P17922	BSU28630	pheT	Phenylalanine--tRNA ligase beta subunit (EC 6.1.1.20) (Phenylalanyl-tRNA synthetase beta subunit) (PheRS)	0.2			178	1	51.503	N
P17922	BSU28630	pheT	Phenylalanine--tRNA ligase beta subunit (EC 6.1.1.20) (Phenylalanyl-tRNA synthetase beta subunit) (PheRS)	0.2			560	1	81.692	N
P17922	BSU28630	pheT	Phenylalanine--tRNA ligase beta subunit (EC 6.1.1.20) (Phenylalanyl-tRNA synthetase beta subunit) (PheRS)	0.2			481	1	88.517	N
P17922	BSU28630	pheT	Phenylalanine--tRNA ligase beta subunit (EC 6.1.1.20) (Phenylalanyl-tRNA synthetase beta subunit) (PheRS)	0.2			539	1	53.981	N
P46343	BSU25340	phoH	PhoH-like protein	0.3			91	1	73.809	N
O32091	BSU31760	pncA	Uncharacterized isochorismatase family protein PncA (EC 3.-.-.-)	0.2			36	1	50.207	N
P50849	BSU16690	pnp	Polyribonucleotide nucleotidyltransferase (EC 2.7.7.8) (Polynucleotide phosphorylase) (PNPase) (Vegetative protein 15) (VEG15)	0.1			187	1	41.139	N
P50849	BSU16690	pnp	Polyribonucleotide nucleotidyltransferase (EC 2.7.7.8) (Polynucleotide phosphorylase) (PNPase) (Vegetative protein 15) (VEG15)	0.1			271	1	104.44	N
P50849	BSU16690	pnp	Polyribonucleotide nucleotidyltransferase (EC 2.7.7.8) (Polynucleotide phosphorylase) (PNPase) (Vegetative protein 15) (VEG15)	0.1			62	1	124.29	N
P50849	BSU16690	pnp	Polyribonucleotide nucleotidyltransferase (EC 2.7.7.8) (Polynucleotide phosphorylase) (PNPase) (Vegetative protein 15) (VEG15)	0.1			176	1	47.712	N
P13267	BSU16580	polC	DNA polymerase III PolC-type (PolIII) (EC 2.7.7.7)	0.5			719	1	57.047	N
P94544	BSU28590	polX	DNA polymerase/3'-5' exonuclease PolX [Includes: DNA polymerase type-X (EC 2.7.7.7); 3'-5' exodeoxyribonuclease (3'-5' exonuclease) (EC 3.1.11.1)]	0.4			492	1	88.706	N
P39793	BSU22320	ponA	Penicillin-binding protein 1A/1B (PBP1) [Includes: Penicillin-insensitive transglycosylase (EC 2.4.1.129) (Peptidoglycan TGase); Penicillin-sensitive transpeptidase (EC 3.4.16.4) (DD-transpeptidase)]	0.2			137	1	85.265	N
P39793	BSU22320	ponA	Penicillin-binding protein 1A/1B (PBP1) [Includes: Penicillin-insensitive transglycosylase (EC 2.4.1.129) (Peptidoglycan TGase); Penicillin-sensitive transpeptidase (EC 3.4.16.4) (DD-transpeptidase)]	0.2			674	1	79.201	N
P39793	BSU22320	ponA	Penicillin-binding protein 1A/1B (PBP1) [Includes: Penicillin-insensitive transglycosylase (EC 2.4.1.129) (Peptidoglycan TGase); Penicillin-sensitive transpeptidase (EC 3.4.16.4) (DD-transpeptidase)]	0.2			194	1	64.104	N
P37487	BSU40550	ppaC	Manganese-dependent inorganic pyrophosphatase (EC 3.6.1.1) (Pyrophosphate phospho-hydrolase) (PPase)	0.1			124	1	66.004	N
P37487	BSU40550	ppaC	Manganese-dependent inorganic pyrophosphatase (EC 3.6.1.1) (Pyrophosphate phospho-hydrolase) (PPase)	0.1			279	1	92.039	N
P37487	BSU40550	ppaC	Manganese-dependent inorganic pyrophosphatase (EC 3.6.1.1) (Pyrophosphate phospho-hydrolase) (PPase)	0.1			183	1	95.197	N
P37487	BSU40550	ppaC	Manganese-dependent inorganic pyrophosphatase (EC 3.6.1.1) (Pyrophosphate phospho-hydrolase) (PPase)	0.1			102	1	107.97	N
P35137	BSU23360	ppiB	Peptidyl-prolyl cis-trans isomerase B (PPIase B) (EC 5.2.1.8) (Rotamase B)	0.1			35	1	101.43	N
P35137	BSU23360	ppiB	Peptidyl-prolyl cis-trans isomerase B (PPIase B) (EC 5.2.1.8) (Rotamase B)	0.1			12	1	93.411	N
P35137	BSU23360	ppiB	Peptidyl-prolyl cis-trans isomerase B (PPIase B) (EC 5.2.1.8) (Rotamase B)	0.1			29	1	112.33	N
P45872	BSU37010	prfA	Peptide chain release factor 1 (RF-1)	0.2			129	1	68.413	N
P45872	BSU37010	prfA	Peptide chain release factor 1 (RF-1)	0.2			151	1	74.296	N
P39821	BSU13130	proA	Gamma-glutamyl phosphate reductase (GPR) (EC 1.2.1.41) (Glutamate-5-semialdehyde dehydrogenase) (Glutamyl-gamma-semialdehyde dehydrogenase) (GSA dehydrogenase)	0.3			193	1	58.32	N
O31755	BSU16570	proS	Proline--tRNA ligase (EC 6.1.1.15) (Prolyl-tRNA synthetase) (ProRS)	0.2			183	1	61.344	N
O31755	BSU16570	proS	Proline--tRNA ligase (EC 6.1.1.15) (Prolyl-tRNA synthetase) (ProRS)	0.2			479	1	113.35	N
O31755	BSU16570	proS	Proline--tRNA ligase (EC 6.1.1.15) (Prolyl-tRNA synthetase) (ProRS)	0.2			259	1	94.887	N
P14193	BSU00510	prs	Ribose-phosphate pyrophosphokinase (RPPK) (EC 2.7.6.1) (5-phospho-D-ribosyl alpha-1-diphosphate) (Phosphoribosyl diphosphate synthase) (Phosphoribosyl pyrophosphate synthase) (P-Rib-PP synthase) (PPRibP synthase) (PRPP synthase) (PRPPase)	0.1			277	1	59.35	N
P14193	BSU00510	prs	Ribose-phosphate pyrophosphokinase (RPPK) (EC 2.7.6.1) (5-phospho-D-ribosyl alpha-1-diphosphate) (Phosphoribosyl diphosphate synthase) (Phosphoribosyl pyrophosphate synthase) (P-Rib-PP synthase) (PPRibP synthase) (PRPP synthase) (PRPPase)	0.1			120	1	176.78	N
P14193	BSU00510	prs	Ribose-phosphate pyrophosphokinase (RPPK) (EC 2.7.6.1) (5-phospho-D-ribosyl alpha-1-diphosphate) (Phosphoribosyl diphosphate synthase) (Phosphoribosyl pyrophosphate synthase) (P-Rib-PP synthase) (PPRibP synthase) (PRPP synthase) (PRPPase)	0.1			92	1	84.169	N
P24327	BSU09950	prsA	Foldase protein PrsA (EC 5.2.1.8)	0.1			118	1	127.12	N
P24327	BSU09950	prsA	Foldase protein PrsA (EC 5.2.1.8)	0.1			276	1	177.6	N
P24327	BSU09950	prsA	Foldase protein PrsA (EC 5.2.1.8)	0.1			44	1	115.58	N
P24327	BSU09950	prsA	Foldase protein PrsA (EC 5.2.1.8)	0.1			76	1	110.39	N
P39646	BSU37660	pta	Phosphate acetyltransferase (EC 2.3.1.8) (Phosphotransacetylase) (Vegetative protein 43) (VEG43)	0.1			61	1	73.881	N
P39646	BSU37660	pta	Phosphate acetyltransferase (EC 2.3.1.8) (Phosphotransacetylase) (Vegetative protein 43) (VEG43)	0.1			106	1	79.013	N
P39646	BSU37660	pta	Phosphate acetyltransferase (EC 2.3.1.8) (Phosphotransacetylase) (Vegetative protein 43) (VEG43)	0.1			262	1	69.122	N
P39646	BSU37660	pta	Phosphate acetyltransferase (EC 2.3.1.8) (Phosphotransacetylase) (Vegetative protein 43) (VEG43)	0.1			273	1	79.88	N
P39646	BSU37660	pta	Phosphate acetyltransferase (EC 2.3.1.8) (Phosphotransacetylase) (Vegetative protein 43) (VEG43)	0.1			284	1	171.39	N
P39646	BSU37660	pta	Phosphate acetyltransferase (EC 2.3.1.8) (Phosphotransacetylase) (Vegetative protein 43) (VEG43)	0.1			43	1	110.84	N
P20166	BSU13890	ptsG	PTS system glucose-specific EIICBA component (EC 2.7.1.199) (EII-Glc/EIII-Glc) (EIICBA-Glc) (EIICBA-Glc 1) [Includes: Glucose permease IIC component (PTS system glucose-specific EIIC component); Glucose-specific phosphotransferase enzyme IIB component (PTS system glucose-specific EIIB component); Glucose-specific phosphotransferase enzyme IIA component (PTS system glucose-specific EIIA component)]	0.1			688	1	91.906	N
P20166	BSU13890	ptsG	PTS system glucose-specific EIICBA component (EC 2.7.1.199) (EII-Glc/EIII-Glc) (EIICBA-Glc) (EIICBA-Glc 1) [Includes: Glucose permease IIC component (PTS system glucose-specific EIIC component); Glucose-specific phosphotransferase enzyme IIB component (PTS system glucose-specific EIIB component); Glucose-specific phosphotransferase enzyme IIA component (PTS system glucose-specific EIIA component)]	0.1			599	1	71.692	N
P08877	BSU13900	ptsH	Phosphocarrier protein HPr (Histidine-containing protein)	0.1			34	1	168.46	N
P08838	BSU13910	ptsI	Phosphoenolpyruvate-protein phosphotransferase (EC 2.7.3.9) (Phosphotransferase system, enzyme I)	0.1			385	1	86.472	N
P08838	BSU13910	ptsI	Phosphoenolpyruvate-protein phosphotransferase (EC 2.7.3.9) (Phosphotransferase system, enzyme I)	0.1			274	1	57.708	N
P08838	BSU13910	ptsI	Phosphoenolpyruvate-protein phosphotransferase (EC 2.7.3.9) (Phosphotransferase system, enzyme I)	0.1			352	1	118.89	N
P08838	BSU13910	ptsI	Phosphoenolpyruvate-protein phosphotransferase (EC 2.7.3.9) (Phosphotransferase system, enzyme I)	0.1			120	1	98.227	N
P08838	BSU13910	ptsI	Phosphoenolpyruvate-protein phosphotransferase (EC 2.7.3.9) (Phosphotransferase system, enzyme I)	0.1			397	1	80.469	N
P08838	BSU13910	ptsI	Phosphoenolpyruvate-protein phosphotransferase (EC 2.7.3.9) (Phosphotransferase system, enzyme I)	0.1			99	1	130.16	N
P08838	BSU13910	ptsI	Phosphoenolpyruvate-protein phosphotransferase (EC 2.7.3.9) (Phosphotransferase system, enzyme I)	0.1			32	1	83.182	N
P08838	BSU13910	ptsI	Phosphoenolpyruvate-protein phosphotransferase (EC 2.7.3.9) (Phosphotransferase system, enzyme I)	0.1			258	1	59.067	N
P29726	BSU40420	purA	Adenylosuccinate synthetase (AMPSase) (AdSS) (EC 6.3.4.4) (IMP--aspartate ligase)	0.1			26	1	95.428	N
P29726	BSU40420	purA	Adenylosuccinate synthetase (AMPSase) (AdSS) (EC 6.3.4.4) (IMP--aspartate ligase)	0.1			208	1	119.38	N
P12047	BSU06440	purB	Adenylosuccinate lyase (ASL) (EC 4.3.2.2) (Adenylosuccinase) (ASase) (Glutamyl--tRNA ligase regulatory factor)	0.1			415	1	62.338	N
O34990	BSU13110	purU	Formyltetrahydrofolate deformylase (EC 3.5.1.10) (Formyl-FH(4) hydrolase)	0.3			261	1	54.157	N
Q9KWU4	BSU14860	pyc	Pyruvate carboxylase (EC 6.4.1.1) (Pyruvic carboxylase) (PYC)	0.1			199	1	42.426	N
Q9KWU4	BSU14860	pyc	Pyruvate carboxylase (EC 6.4.1.1) (Pyruvic carboxylase) (PYC)	0.1			210	1	74.717	N
Q9KWU4	BSU14860	pyc	Pyruvate carboxylase (EC 6.4.1.1) (Pyruvic carboxylase) (PYC)	0.1			685	1	93.226	N
P80885	BSU29180	pyk	Pyruvate kinase (PK) (EC 2.7.1.40) (Vegetative protein 17) (VEG17)	0.1			268	1	117.65	N
P80885	BSU29180	pyk	Pyruvate kinase (PK) (EC 2.7.1.40) (Vegetative protein 17) (VEG17)	0.1			465	1	126.25	N
P80885	BSU29180	pyk	Pyruvate kinase (PK) (EC 2.7.1.40) (Vegetative protein 17) (VEG17)	0.1			29	1	103.74	N
P80885	BSU29180	pyk	Pyruvate kinase (PK) (EC 2.7.1.40) (Vegetative protein 17) (VEG17)	0.1			34	1	113.25	N
P80885	BSU29180	pyk	Pyruvate kinase (PK) (EC 2.7.1.40) (Vegetative protein 17) (VEG17)	0.1			340	1	140.98	N
P80885	BSU29180	pyk	Pyruvate kinase (PK) (EC 2.7.1.40) (Vegetative protein 17) (VEG17)	0.1			441	1	83.206	N
P13242	BSU37150	pyrG	CTP synthase (EC 6.3.4.2) (Cytidine 5'-triphosphate synthase) (Cytidine triphosphate synthetase) (CTP synthetase) (CTPS) (UTP--ammonia ligase)	0.2			34	1	127.56	N
O31749	BSU16510	pyrH	Uridylate kinase (UK) (EC 2.7.4.22) (Uridine monophosphate kinase) (UMP kinase) (UMPK)	0.1			137	1	65.149	N
P34957	BSU38170	qoxA	Quinol oxidase subunit 2 (EC 1.10.3.-) (Oxidase aa(3)-600 subunit 2) (Quinol oxidase aa3-600, subunit QoxA) (Quinol oxidase polypeptide II)	0.1			261	1	83.871	N
P34957	BSU38170	qoxA	Quinol oxidase subunit 2 (EC 1.10.3.-) (Oxidase aa(3)-600 subunit 2) (Quinol oxidase aa3-600, subunit QoxA) (Quinol oxidase polypeptide II)	0.1			307	1	69.598	N
O32054	BSU27720	queA	S-adenosylmethionine:tRNA ribosyltransferase-isomerase (EC 2.4.99.17) (Queuosine biosynthesis protein QueA)	0.4			297	1	56.139	N
O32054	BSU27720	queA	S-adenosylmethionine:tRNA ribosyltransferase-isomerase (EC 2.4.99.17) (Queuosine biosynthesis protein QueA)	0.4			323	1	52.344	N
P36947	BSU35940	rbsA	Ribose import ATP-binding protein RbsA (EC 7.5.2.7)	0.4			437	1	49.483	N
P36945	BSU35920	rbsK	Ribokinase (RK) (EC 2.7.1.15)	0.2			245	1	57.78	N
P16971	BSU16940	recA	Protein RecA (Recombinase A)	0.1			181	1	49.59	N
P16971	BSU16940	recA	Protein RecA (Recombinase A)	0.1			203	1	45.207	N
P39630	BSU37830	rfbB	dTDP-glucose 4,6-dehydratase (EC 4.2.1.46) (Spore coat polysaccharide biosynthesis protein SpsJ)	0.9			283	1	57.463	N
O31740	BSU16020	rimM	Ribosome maturation factor RimM	0.2			48	1	79.089	N
O31503	BSU06730	rlmCD	23S rRNA (uracil-C(5))-methyltransferase RlmCD (EC 2.1.1.189) (EC 2.1.1.190) (23S rRNA (uracil(1939)-C(5))-methyltransferase) (23S rRNA (uracil(747)-C(5))-methyltransferase)	0.5			186	1	53.493	N
O34617	BSU15750	rlmN	Probable dual-specificity RNA methyltransferase RlmN (EC 2.1.1.192) (23S rRNA (adenine(2503)-C(2))-methyltransferase) (23S rRNA m2A2503 methyltransferase) (Ribosomal RNA large subunit methyltransferase N) (tRNA (adenine(37)-C(2))-methyltransferase) (tRNA m2A37 methyltransferase)	0.4			193	1	41.502	N
P51833	BSU15930	rnc	Ribonuclease 3 (EC 3.1.26.3) (Ribonuclease III) (RNase III)	0.2			205	1	80.979	N
Q45493	BSU14530	rnjA	Ribonuclease J1 (RNase J1) (EC 3.1.-.-)	0.2			234	1	99.5	N
Q45493	BSU14530	rnjA	Ribonuclease J1 (RNase J1) (EC 3.1.-.-)	0.2			120	1	48.423	N
O31760	BSU16780	rnjB	Ribonuclease J2 (RNase J2) (EC 3.1.-.-)	0.2			520	1	80.638	N
O32231	BSU33610	rnr	Ribonuclease R (RNase R) (EC 3.1.13.1) (VacB protein homolog)	0.3			697	1	44.863	N
O31774	BSU16960	rny	Ribonuclease Y (RNase Y) (EC 3.1.-.-)	0.2			165	1	100.23	N
P39138	BSU40320	rocF	Arginase (EC 3.5.3.1)	0.1			270	1	109.25	N
O34857	BSU14240	rok	Repressor Rok	0.1			132	1	47.045	N
O34557	BSU15790	rpe	Ribulose-phosphate 3-epimerase (EC 5.1.3.1)	0.4			18	1	56.247	N
Q06797	BSU01030	rplA	50S ribosomal protein L1 (BL1)	0.1			170	1	85.29	N
Q06797	BSU01030	rplA	50S ribosomal protein L1 (BL1)	0.1			102	1	223.22	N
Q06797	BSU01030	rplA	50S ribosomal protein L1 (BL1)	0.1			139	1	81.716	N
Q06797	BSU01030	rplA	50S ribosomal protein L1 (BL1)	0.1			55	1	102.72	N
Q06797	BSU01030	rplA	50S ribosomal protein L1 (BL1)	0.1			34	1	153.23	N
Q06797	BSU01030	rplA	50S ribosomal protein L1 (BL1)	0.1			188	1	168.14	N
Q06797	BSU01030	rplA	50S ribosomal protein L1 (BL1)	0.1			211	1	96.015	N
Q06797	BSU01030	rplA	50S ribosomal protein L1 (BL1)	0.1			230	1	133.86	N
P42919	BSU01190	rplB	50S ribosomal protein L2 (BL2)	0.1			90	1	112.24	N
P42919	BSU01190	rplB	50S ribosomal protein L2 (BL2)	0.1			95	1	129.01	N
P42919	BSU01190	rplB	50S ribosomal protein L2 (BL2)	0.1			86	1	118.5	N
P42920	BSU01160	rplC	50S ribosomal protein L3 (BL3)	0.1			62	1	89.171	N
P42920	BSU01160	rplC	50S ribosomal protein L3 (BL3)	0.1			191	1	69.432	N
P42920	BSU01160	rplC	50S ribosomal protein L3 (BL3)	0.1			43	1	94.632	N
P42920	BSU01160	rplC	50S ribosomal protein L3 (BL3)	0.1			184	1	94.669	N
P42920	BSU01160	rplC	50S ribosomal protein L3 (BL3)	0.1			152	1	68.413	N
P42921	BSU01170	rplD	50S ribosomal protein L4	0.1			160	1	139.19	N
P42921	BSU01170	rplD	50S ribosomal protein L4	0.1			169	1	196.1	N
P12877	BSU01280	rplE	50S ribosomal protein L5 (BL6)	0.1			21	1	82.489	N
P12877	BSU01280	rplE	50S ribosomal protein L5 (BL6)	0.1			161	1	139.89	N
P12877	BSU01280	rplE	50S ribosomal protein L5 (BL6)	0.1			127	1	98.523	N
P12877	BSU01280	rplE	50S ribosomal protein L5 (BL6)	0.1			37	1	137.89	N
P12877	BSU01280	rplE	50S ribosomal protein L5 (BL6)	0.1			9	1	116.55	N
P46898	BSU01310	rplF	50S ribosomal protein L6 (BL10)	0.1			75	1	116.13	N
P46898	BSU01310	rplF	50S ribosomal protein L6 (BL10)	0.1			49	1	171.91	N
P46898	BSU01310	rplF	50S ribosomal protein L6 (BL10)	0.1			148	1	117.62	N
P37437	BSU40500	rplI	50S ribosomal protein L9 (BL17)	0.1			128	1	64.265	N
P42923	BSU01040	rplJ	50S ribosomal protein L10 (BL5) (Cold acclimatization protein) (CAP) (Vegetative protein 300) (VEG300)	0.1			49	1	117.1	N
P42923	BSU01040	rplJ	50S ribosomal protein L10 (BL5) (Cold acclimatization protein) (CAP) (Vegetative protein 300) (VEG300)	0.1			34	1	124.21	N
P42923	BSU01040	rplJ	50S ribosomal protein L10 (BL5) (Cold acclimatization protein) (CAP) (Vegetative protein 300) (VEG300)	0.1			102	1	102.06	N
P42923	BSU01040	rplJ	50S ribosomal protein L10 (BL5) (Cold acclimatization protein) (CAP) (Vegetative protein 300) (VEG300)	0.1			149	1	67.035	N
P42923	BSU01040	rplJ	50S ribosomal protein L10 (BL5) (Cold acclimatization protein) (CAP) (Vegetative protein 300) (VEG300)	0.1			97	1	49.358	N
Q06796	BSU01020	rplK	50S ribosomal protein L11 (BL11)	0.1			93	1	102.95	N
Q06796	BSU01020	rplK	50S ribosomal protein L11 (BL11)	0.1			117	1	110.11	N
P02394	BSU01050	rplL	50S ribosomal protein L7/L12 (BL9) (Vegetative protein 341) (VEG341)	0.1			4	1	136.5	N
P02394	BSU01050	rplL	50S ribosomal protein L7/L12 (BL9) (Vegetative protein 341) (VEG341)	0.1			21	1	109.83	N
P02394	BSU01050	rplL	50S ribosomal protein L7/L12 (BL9) (Vegetative protein 341) (VEG341)	0.1			92	1	96.229	N
P70974	BSU01490	rplM	50S ribosomal protein L13	0.1			124	1	46.351	N
P70974	BSU01490	rplM	50S ribosomal protein L13	0.1			96	1	97.473	N
P70974	BSU01490	rplM	50S ribosomal protein L13	0.1			8	1	92.866	N
P12875	BSU01260	rplN	50S ribosomal protein L14	0.1			34	1	108.56	N
P12875	BSU01260	rplN	50S ribosomal protein L14	0.1			13	1	78.377	N
P12875	BSU01260	rplN	50S ribosomal protein L14	0.1			82	1	101.54	N
P19946	BSU01350	rplO	50S ribosomal protein L15	0.1			126	1	81.972	N
P19946	BSU01350	rplO	50S ribosomal protein L15	0.1			78	1	123.72	N
P19946	BSU01350	rplO	50S ribosomal protein L15	0.1			106	1	85.306	N
P19946	BSU01350	rplO	50S ribosomal protein L15	0.1			83	1	120.63	N
P14577	BSU01230	rplP	50S ribosomal protein L16	0.1			44	1	141.08	N
P14577	BSU01230	rplP	50S ribosomal protein L16	0.1			142	1	73.885	N
P20277	BSU01440	rplQ	50S ribosomal protein L17 (BL15) (BL21)	0.1			27	1	230.06	N
P46899	BSU01320	rplR	50S ribosomal protein L18 (BL16)	0.1			64	1	205.81	N
O31742	BSU16040	rplS	50S ribosomal protein L19	0.1			36	1	57.5	N
P55873	BSU28850	rplT	50S ribosomal protein L20	0.1			66	1	76.347	N
P55873	BSU28850	rplT	50S ribosomal protein L20	0.1			101	1	142.23	N
P55873	BSU28850	rplT	50S ribosomal protein L20	0.1			91	1	109.44	N
P55873	BSU28850	rplT	50S ribosomal protein L20	0.1			72	1	90.709	N
P55873	BSU28850	rplT	50S ribosomal protein L20	0.1			44	1	97.068	N
P26908	BSU27960	rplU	50S ribosomal protein L21 (BL20)	0.1			81	1	91.093	N
P26908	BSU27960	rplU	50S ribosomal protein L21 (BL20)	0.1			45	1	204.82	N
P26908	BSU27960	rplU	50S ribosomal protein L21 (BL20)	0.1			50	1	148.78	N
P42924	BSU01180	rplW	50S ribosomal protein L23	0.1			35	1	72.492	N
P42924	BSU01180	rplW	50S ribosomal protein L23	0.1			55	1	170.94	N
P0CI78	BSU01270	rplX	50S ribosomal protein L24 (12 kDa DNA-binding protein) (BL23) (HPB12)	0.1			39	1	114.5	N
P05657	BSU27940	rpmA	50S ribosomal protein L27 (BL24) (BL30)	0.1			58	1	98.523	N
P37807	BSU15820	rpmB	50S ribosomal protein L28	0.1			23	1	78.77	N
P12873	BSU01240	rpmC	50S ribosomal protein L29	0.1			65	1	53.965	N
P12873	BSU01240	rpmC	50S ribosomal protein L29	0.1			27	1	46.73	N
P19947	BSU01340	rpmD	50S ribosomal protein L30 (BL27)	0.1			40	1	95.067	N
Q03223	BSU37070	rpmE	50S ribosomal protein L31	0.1			8	1	62.659	N
Q03223	BSU37070	rpmE	50S ribosomal protein L31	0.1			20	1	140.22	N
O34687	BSU15080	rpmF	50S ribosomal protein L32	0.1			23	1	117.37	N
P56849	BSU24900	rpmGA	50S ribosomal protein L33 1	0.1			4	1	67.153	N
P55874	BSU28860	rpmI	50S ribosomal protein L35	0.1			64	1	103.29	N
P55874	BSU28860	rpmI	50S ribosomal protein L35	0.1			35	1	91.313	N
P20278	BSU01400	rpmJ	50S ribosomal protein L36 (BL38) (Ribosomal protein B) (Ribosomal protein II)	0.1			29	1	74.464	N
P20429	BSU01430	rpoA	DNA-directed RNA polymerase subunit alpha (RNAP subunit alpha) (EC 2.7.7.6) (RNA polymerase subunit alpha) (Transcriptase subunit alpha)	0.1			154	1	108.46	N
P20429	BSU01430	rpoA	DNA-directed RNA polymerase subunit alpha (RNAP subunit alpha) (EC 2.7.7.6) (RNA polymerase subunit alpha) (Transcriptase subunit alpha)	0.1			264	1	83.229	N
P20429	BSU01430	rpoA	DNA-directed RNA polymerase subunit alpha (RNAP subunit alpha) (EC 2.7.7.6) (RNA polymerase subunit alpha) (Transcriptase subunit alpha)	0.1			182	1	160.16	N
P37870	BSU01070	rpoB	DNA-directed RNA polymerase subunit beta (RNAP subunit beta) (EC 2.7.7.6) (RNA polymerase subunit beta) (Transcriptase subunit beta)	0.1			214	1	99.407	N
P37870	BSU01070	rpoB	DNA-directed RNA polymerase subunit beta (RNAP subunit beta) (EC 2.7.7.6) (RNA polymerase subunit beta) (Transcriptase subunit beta)	0.1			815	1	74.533	N
P37870	BSU01070	rpoB	DNA-directed RNA polymerase subunit beta (RNAP subunit beta) (EC 2.7.7.6) (RNA polymerase subunit beta) (Transcriptase subunit beta)	0.1			165	1	96.24	N
P37870	BSU01070	rpoB	DNA-directed RNA polymerase subunit beta (RNAP subunit beta) (EC 2.7.7.6) (RNA polymerase subunit beta) (Transcriptase subunit beta)	0.1			706	1	75.819	N
P37870	BSU01070	rpoB	DNA-directed RNA polymerase subunit beta (RNAP subunit beta) (EC 2.7.7.6) (RNA polymerase subunit beta) (Transcriptase subunit beta)	0.1			958	1	64.289	N
P37870	BSU01070	rpoB	DNA-directed RNA polymerase subunit beta (RNAP subunit beta) (EC 2.7.7.6) (RNA polymerase subunit beta) (Transcriptase subunit beta)	0.1			100	1	91.658	N
P37870	BSU01070	rpoB	DNA-directed RNA polymerase subunit beta (RNAP subunit beta) (EC 2.7.7.6) (RNA polymerase subunit beta) (Transcriptase subunit beta)	0.1			606	1	92.781	N
P37870	BSU01070	rpoB	DNA-directed RNA polymerase subunit beta (RNAP subunit beta) (EC 2.7.7.6) (RNA polymerase subunit beta) (Transcriptase subunit beta)	0.1			219	1	164.53	N
P37870	BSU01070	rpoB	DNA-directed RNA polymerase subunit beta (RNAP subunit beta) (EC 2.7.7.6) (RNA polymerase subunit beta) (Transcriptase subunit beta)	0.1			269	1	58.596	N
P37870	BSU01070	rpoB	DNA-directed RNA polymerase subunit beta (RNAP subunit beta) (EC 2.7.7.6) (RNA polymerase subunit beta) (Transcriptase subunit beta)	0.1			1028	1	63.565	N
P37871	BSU01080	rpoC	DNA-directed RNA polymerase subunit beta' (RNAP subunit beta') (EC 2.7.7.6) (RNA polymerase subunit beta') (Transcriptase subunit beta')	0.1			141	1	42.863	N
P37871	BSU01080	rpoC	DNA-directed RNA polymerase subunit beta' (RNAP subunit beta') (EC 2.7.7.6) (RNA polymerase subunit beta') (Transcriptase subunit beta')	0.1			255	1	89.403	N
P37871	BSU01080	rpoC	DNA-directed RNA polymerase subunit beta' (RNAP subunit beta') (EC 2.7.7.6) (RNA polymerase subunit beta') (Transcriptase subunit beta')	0.1			382	1	79.939	N
P37871	BSU01080	rpoC	DNA-directed RNA polymerase subunit beta' (RNAP subunit beta') (EC 2.7.7.6) (RNA polymerase subunit beta') (Transcriptase subunit beta')	0.1			753	1	78.178	N
P37871	BSU01080	rpoC	DNA-directed RNA polymerase subunit beta' (RNAP subunit beta') (EC 2.7.7.6) (RNA polymerase subunit beta') (Transcriptase subunit beta')	0.1			737	1	117.03	N
P37871	BSU01080	rpoC	DNA-directed RNA polymerase subunit beta' (RNAP subunit beta') (EC 2.7.7.6) (RNA polymerase subunit beta') (Transcriptase subunit beta')	0.1			982	1	92.31	N
P37871	BSU01080	rpoC	DNA-directed RNA polymerase subunit beta' (RNAP subunit beta') (EC 2.7.7.6) (RNA polymerase subunit beta') (Transcriptase subunit beta')	0.1			579	1	92.474	N
P37871	BSU01080	rpoC	DNA-directed RNA polymerase subunit beta' (RNAP subunit beta') (EC 2.7.7.6) (RNA polymerase subunit beta') (Transcriptase subunit beta')	0.1			585	1	65.197	N
P37871	BSU01080	rpoC	DNA-directed RNA polymerase subunit beta' (RNAP subunit beta') (EC 2.7.7.6) (RNA polymerase subunit beta') (Transcriptase subunit beta')	0.1			893	1	117.93	N
P37871	BSU01080	rpoC	DNA-directed RNA polymerase subunit beta' (RNAP subunit beta') (EC 2.7.7.6) (RNA polymerase subunit beta') (Transcriptase subunit beta')	0.1			724	1	99.392	N
P37871	BSU01080	rpoC	DNA-directed RNA polymerase subunit beta' (RNAP subunit beta') (EC 2.7.7.6) (RNA polymerase subunit beta') (Transcriptase subunit beta')	0.1			542	1	114.5	N
P21464	BSU16490	rpsB	30S ribosomal protein S2 (BS1) (Vegetative protein 209) (VEG209)	0.1			55	1	115.7	N
P21464	BSU16490	rpsB	30S ribosomal protein S2 (BS1) (Vegetative protein 209) (VEG209)	0.1			59	1	66.073	N
P21464	BSU16490	rpsB	30S ribosomal protein S2 (BS1) (Vegetative protein 209) (VEG209)	0.1			103	1	120.86	N
P21465	BSU01220	rpsC	30S ribosomal protein S3 (BS3) (BS2)	0.1			118	1	264.28	N
P21465	BSU01220	rpsC	30S ribosomal protein S3 (BS3) (BS2)	0.1			91	1	78.816	N
P21465	BSU01220	rpsC	30S ribosomal protein S3 (BS3) (BS2)	0.1			213	1	80.229	N
P21465	BSU01220	rpsC	30S ribosomal protein S3 (BS3) (BS2)	0.1			101	1	114.4	N
P21465	BSU01220	rpsC	30S ribosomal protein S3 (BS3) (BS2)	0.1			64	1	102.28	N
P21465	BSU01220	rpsC	30S ribosomal protein S3 (BS3) (BS2)	0.1			6	1	83.801	N
P21466	BSU29660	rpsD	30S ribosomal protein S4 (BS4)	0.1			85	1	140.14	N
P21466	BSU29660	rpsD	30S ribosomal protein S4 (BS4)	0.1			64	1	73.26	N
P21466	BSU29660	rpsD	30S ribosomal protein S4 (BS4)	0.1			96	1	84.568	N
P21466	BSU29660	rpsD	30S ribosomal protein S4 (BS4)	0.1			147	1	49.715	N
P21466	BSU29660	rpsD	30S ribosomal protein S4 (BS4)	0.1			190	1	148.33	N
P21467	BSU01330	rpsE	30S ribosomal protein S5 (BS5)	0.1			19	1	110.54	N
P21467	BSU01330	rpsE	30S ribosomal protein S5 (BS5)	0.1			70	1	177.6	N
P21467	BSU01330	rpsE	30S ribosomal protein S5 (BS5)	0.1			131	1	123.75	N
P21468	BSU40910	rpsF	30S ribosomal protein S6 (BS9)	0.1			13	1	74.047	N
P21468	BSU40910	rpsF	30S ribosomal protein S6 (BS9)	0.1			53	1	145.33	N
P21469	BSU01110	rpsG	30S ribosomal protein S7 (BS7)	0.1			19	1	51.841	N
P21469	BSU01110	rpsG	30S ribosomal protein S7 (BS7)	0.1			56	1	231.06	N
P21469	BSU01110	rpsG	30S ribosomal protein S7 (BS7)	0.1			122	1	241.76	N
P21469	BSU01110	rpsG	30S ribosomal protein S7 (BS7)	0.1			68	1	134.26	N
P21469	BSU01110	rpsG	30S ribosomal protein S7 (BS7)	0.1			106	1	126.04	N
P12879	BSU01300	rpsH	30S ribosomal protein S8 (BS8)	0.1			92	1	76.847	N
P04969	BSU01420	rpsK	30S ribosomal protein S11 (BS11)	0.1			17	1	112.13	N
P21472	BSU01100	rpsL	30S ribosomal protein S12 (BS12)	0.1			37	1	132.32	N
P21472	BSU01100	rpsL	30S ribosomal protein S12 (BS12)	0.1			122	1	140.83	N
P21472	BSU01100	rpsL	30S ribosomal protein S12 (BS12)	0.1			29	1	64.776	N
P21472	BSU01100	rpsL	30S ribosomal protein S12 (BS12)	0.1			59	1	66.087	N
P21472	BSU01100	rpsL	30S ribosomal protein S12 (BS12)	0.1			25	1	103.28	N
P21472	BSU01100	rpsL	30S ribosomal protein S12 (BS12)	0.1			18	1	103.55	N
P20282	BSU01410	rpsM	30S ribosomal protein S13 (BS14)	0.1			76	1	97.596	N
P20282	BSU01410	rpsM	30S ribosomal protein S13 (BS14)	0.1			118	1	43.124	N
P21473	BSU16680	rpsO	30S ribosomal protein S15 (BS18)	0.1			72	1	69.432	N
P21473	BSU16680	rpsO	30S ribosomal protein S15 (BS18)	0.1			83	1	64.757	N
P21474	BSU15990	rpsP	30S ribosomal protein S16 (BS17)	0.1			41	1	121.83	N
P21474	BSU15990	rpsP	30S ribosomal protein S16 (BS17)	0.1			72	1	183.22	N
P21475	BSU40890	rpsR	30S ribosomal protein S18 (BS21)	0.1			53	1	71.692	N
P21476	BSU01200	rpsS	30S ribosomal protein S19 (BS19)	0.1			23	1	98.299	N
P21477	BSU25550	rpsT	30S ribosomal protein S20 (BS20)	0.1			21	1	50.966	N
P21478	BSU25410	rpsU	30S ribosomal protein S21 (BS-B)	0.1			9	1	60.518	N
P50863	BSU01540	salA	Iron-sulfur cluster carrier protein	0.2			126	1	77.894	N
P50863	BSU01540	salA	Iron-sulfur cluster carrier protein	0.2			274	1	41.912	N
P08065	BSU28440	sdhA	Succinate dehydrogenase flavoprotein subunit (EC 1.3.5.1)	0.1			462	1	54.598	N
P08065	BSU28440	sdhA	Succinate dehydrogenase flavoprotein subunit (EC 1.3.5.1)	0.1			390	1	66.644	N
P08065	BSU28440	sdhA	Succinate dehydrogenase flavoprotein subunit (EC 1.3.5.1)	0.1			104	1	62.714	N
P08065	BSU28440	sdhA	Succinate dehydrogenase flavoprotein subunit (EC 1.3.5.1)	0.1			524	1	95.099	N
P08065	BSU28440	sdhA	Succinate dehydrogenase flavoprotein subunit (EC 1.3.5.1)	0.1			281	1	63.076	N
P08065	BSU28440	sdhA	Succinate dehydrogenase flavoprotein subunit (EC 1.3.5.1)	0.1			411	1	92.792	N
P08066	BSU28430	sdhB	Succinate dehydrogenase iron-sulfur subunit (EC 1.3.5.1)	0.1			236	1	85.377	N
P28366	BSU35300	secA	Protein translocase subunit SecA	0.2			277	1	91.636	N
P28366	BSU35300	secA	Protein translocase subunit SecA	0.2			662	1	44.555	N
P28366	BSU35300	secA	Protein translocase subunit SecA	0.2			485	1	58.674	N
P28366	BSU35300	secA	Protein translocase subunit SecA	0.2			35	1	92.792	N
P28366	BSU35300	secA	Protein translocase subunit SecA	0.2			6	1	44.531	N
P28366	BSU35300	secA	Protein translocase subunit SecA	0.2			697	1	101.97	N
O32047	BSU27650	secDF	Protein translocase subunit SecDF	0.1			554	1	69.024	N
O32047	BSU27650	secDF	Protein translocase subunit SecDF	0.1			230	1	63.181	N
O32047	BSU27650	secDF	Protein translocase subunit SecDF	0.1			69	1	95.018	N
P37464	BSU00130	serS	Serine--tRNA ligase (EC 6.1.1.11) (Seryl-tRNA synthetase) (SerRS) (Seryl-tRNA(Ser/Sec) synthetase)	0.2			121	1	114.23	N
P06224	BSU25200	sigA	RNA polymerase sigma factor SigA (Sigma-43) (Sigma-A)	0.2			220	1	64.439	N
P06224	BSU25200	sigA	RNA polymerase sigma factor SigA (Sigma-43) (Sigma-A)	0.2			142	1	73.616	N
P06224	BSU25200	sigA	RNA polymerase sigma factor SigA (Sigma-43) (Sigma-A)	0.2			113	1	89.296	N
P54375	BSU25020	sodA	Superoxide dismutase [Mn] (EC 1.15.1.1) (General stress protein 24) (GSP24)	0.1			51	1	147.4	N
P54375	BSU25020	sodA	Superoxide dismutase [Mn] (EC 1.15.1.1) (General stress protein 24) (GSP24)	0.1			67	1	149.22	N
P21885	BSU14630	speA	Arginine decarboxylase (EC 4.1.1.19)	0.5			417	1	45.28	N
P70999	BSU37490	speB	Agmatinase (EC 3.5.3.11) (Agmatine ureohydrolase) (AUH)	0.3			70	1	81.356	N
P70999	BSU37490	speB	Agmatinase (EC 3.5.3.11) (Agmatine ureohydrolase) (AUH)	0.3			254	1	83.287	N
P70998	BSU37500	speE	Polyamine aminopropyltransferase (Putrescine aminopropyltransferase) (PAPT) (Spermidine synthase) (SPDS) (SPDSY) (EC 2.5.1.16)	0.2			220	1	66.871	N
O34525	BSU29530	sppA	Putative signal peptide peptidase SppA (EC 3.4.21.-)	0.2			260	1	77.391	N
P37455	BSU40900	ssbA	Single-stranded DNA-binding protein A (SSB A)	0.1			50	1	60.943	N
P80886	BSU16090	sucC	Succinate--CoA ligase [ADP-forming] subunit beta (EC 6.2.1.5) (Succinyl-CoA synthetase subunit beta) (SCS-beta)	0.1			208	1	108.1	N
P80886	BSU16090	sucC	Succinate--CoA ligase [ADP-forming] subunit beta (EC 6.2.1.5) (Succinyl-CoA synthetase subunit beta) (SCS-beta)	0.1			168	1	44.863	N
P80886	BSU16090	sucC	Succinate--CoA ligase [ADP-forming] subunit beta (EC 6.2.1.5) (Succinyl-CoA synthetase subunit beta) (SCS-beta)	0.1			317	1	109.11	N
P80886	BSU16090	sucC	Succinate--CoA ligase [ADP-forming] subunit beta (EC 6.2.1.5) (Succinyl-CoA synthetase subunit beta) (SCS-beta)	0.1			285	1	86.625	N
P80886	BSU16090	sucC	Succinate--CoA ligase [ADP-forming] subunit beta (EC 6.2.1.5) (Succinyl-CoA synthetase subunit beta) (SCS-beta)	0.1			353	1	80.69	N
P80886	BSU16090	sucC	Succinate--CoA ligase [ADP-forming] subunit beta (EC 6.2.1.5) (Succinyl-CoA synthetase subunit beta) (SCS-beta)	0.1			217	1	112.71	N
P80865	BSU16100	sucD	Succinate--CoA ligase [ADP-forming] subunit alpha (EC 6.2.1.5) (Succinyl-CoA synthetase subunit alpha) (SCS-alpha)	0.1			196	1	121.83	N
P80865	BSU16100	sucD	Succinate--CoA ligase [ADP-forming] subunit alpha (EC 6.2.1.5) (Succinyl-CoA synthetase subunit alpha) (SCS-alpha)	0.1			225	1	85.42	N
P80865	BSU16100	sucD	Succinate--CoA ligase [ADP-forming] subunit alpha (EC 6.2.1.5) (Succinyl-CoA synthetase subunit alpha) (SCS-alpha)	0.1			123	1	68.173	N
P80865	BSU16100	sucD	Succinate--CoA ligase [ADP-forming] subunit alpha (EC 6.2.1.5) (Succinyl-CoA synthetase subunit alpha) (SCS-alpha)	0.1			267	1	81.144	N
O32162	BSU32670	sufB	FeS cluster assembly protein SufB	0.1			153	1	199.38	N
O32162	BSU32670	sufB	FeS cluster assembly protein SufB	0.1			453	1	131.37	N
O32162	BSU32670	sufB	FeS cluster assembly protein SufB	0.1			205	1	145.99	N
O32162	BSU32670	sufB	FeS cluster assembly protein SufB	0.1			337	1	77.222	N
O32162	BSU32670	sufB	FeS cluster assembly protein SufB	0.1			372	1	132.97	N
O32162	BSU32670	sufB	FeS cluster assembly protein SufB	0.1			290	1	106.67	N
P80866	BSU32710	sufC	Vegetative protein 296 (VEG296)	0.1			25	1	81.297	N
P80866	BSU32710	sufC	Vegetative protein 296 (VEG296)	0.1			211	1	126.63	N
P80866	BSU32710	sufC	Vegetative protein 296 (VEG296)	0.1			145	1	96.342	N
O32165	BSU32700	sufD	FeS cluster assembly protein SufD	0.1			87	1	158.04	N
O32165	BSU32700	sufD	FeS cluster assembly protein SufD	0.1			345	1	98.904	N
O32165	BSU32700	sufD	FeS cluster assembly protein SufD	0.1			364	1	93.596	N
O32165	BSU32700	sufD	FeS cluster assembly protein SufD	0.1			217	1	134.03	N
O32165	BSU32700	sufD	FeS cluster assembly protein SufD	0.1			66	1	137.61	N
O32164	BSU32690	sufS	Cysteine desulfurase SufS (EC 2.8.1.7)	0.2			383	1	86.546	N
O32163	BSU32680	sufU	Zinc-dependent sulfurtransferase SufU (EC 2.-.-.-) (Putative iron-sulfur cluster assembly scaffold protein SufU) (Sulfur acceptor protein SufU)	0.2			147	1	60.76	N
P96499	BSU35520	tagV	Polyisoprenyl-teichoic acid--peptidoglycan teichoic acid transferase TagV (EC 2.7.8.-)	0.2			265	1	96.668	N
P19669	BSU37110	tal	Transaldolase (EC 2.2.1.2) (20 kDa phosphoprotein OrfU) (CSI9)	0.1			17	1	84.975	N
P19669	BSU37110	tal	Transaldolase (EC 2.2.1.2) (20 kDa phosphoprotein OrfU) (CSI9)	0.1			37	1	57.55	N
P19669	BSU37110	tal	Transaldolase (EC 2.2.1.2) (20 kDa phosphoprotein OrfU) (CSI9)	0.1			80	1	49.097	N
P19669	BSU37110	tal	Transaldolase (EC 2.2.1.2) (20 kDa phosphoprotein OrfU) (CSI9)	0.1			9	1	55.724	N
O32037	BSU27540	tcdA	tRNA threonylcarbamoyladenosine dehydratase (EC 6.1.-.-) (t(6)A37 dehydratase)	0.3			149	1	72.958	N
P42199	BSU03610	tcyA	L-cystine-binding protein TcyA	0.2			169	1	53.351	N
P42199	BSU03610	tcyA	L-cystine-binding protein TcyA	0.2			204	1	88.734	N
P80698	BSU28230	tig	Trigger factor (TF) (EC 5.2.1.8) (PPIase) (Vegetative protein 2) (VEG2)	0.1			371	1	104.17	N
P80698	BSU28230	tig	Trigger factor (TF) (EC 5.2.1.8) (PPIase) (Vegetative protein 2) (VEG2)	0.1			423	1	133.98	N
P80698	BSU28230	tig	Trigger factor (TF) (EC 5.2.1.8) (PPIase) (Vegetative protein 2) (VEG2)	0.1			299	1	177.88	N
P80698	BSU28230	tig	Trigger factor (TF) (EC 5.2.1.8) (PPIase) (Vegetative protein 2) (VEG2)	0.1			164	1	78.128	N
P80698	BSU28230	tig	Trigger factor (TF) (EC 5.2.1.8) (PPIase) (Vegetative protein 2) (VEG2)	0.1			282	1	124.38	N
P80698	BSU28230	tig	Trigger factor (TF) (EC 5.2.1.8) (PPIase) (Vegetative protein 2) (VEG2)	0.1			391	1	108.43	N
P80698	BSU28230	tig	Trigger factor (TF) (EC 5.2.1.8) (PPIase) (Vegetative protein 2) (VEG2)	0.1			396	1	139.86	N
P80698	BSU28230	tig	Trigger factor (TF) (EC 5.2.1.8) (PPIase) (Vegetative protein 2) (VEG2)	0.1			360	1	148.32	N
P45694	BSU17890	tkt	Transketolase (TK) (EC 2.2.1.1)	0.1			144	1	167.74	N
P45694	BSU17890	tkt	Transketolase (TK) (EC 2.2.1.1)	0.1			577	1	99.092	N
P45694	BSU17890	tkt	Transketolase (TK) (EC 2.2.1.1)	0.1			139	1	86.833	N
P45694	BSU17890	tkt	Transketolase (TK) (EC 2.2.1.1)	0.1			385	1	85.808	N
P45694	BSU17890	tkt	Transketolase (TK) (EC 2.2.1.1)	0.1			186	1	106.93	N
P45694	BSU17890	tkt	Transketolase (TK) (EC 2.2.1.1)	0.1			600	1	91.592	N
P45694	BSU17890	tkt	Transketolase (TK) (EC 2.2.1.1)	0.1			201	1	114.19	N
P45694	BSU17890	tkt	Transketolase (TK) (EC 2.2.1.1)	0.1			254	1	116.05	N
P39814	BSU16120	topA	DNA topoisomerase 1 (EC 5.6.2.1) (DNA topoisomerase I) (Omega-protein) (Relaxing enzyme) (Swivelase) (Untwisting enzyme)	0.2			549	1	49.12	N
P27876	BSU33920	tpiA	Triosephosphate isomerase (TIM) (TPI) (EC 5.3.1.1) (Triose-phosphate isomerase)	0.1			184	1	94.692	N
P27876	BSU33920	tpiA	Triosephosphate isomerase (TIM) (TPI) (EC 5.3.1.1) (Triose-phosphate isomerase)	0.1			110	1	49.31	N
P80864	BSU29490	tpx	Thiol peroxidase (Tpx) (EC 1.11.1.24) (Peroxiredoxin tpx) (Prx) (Thioredoxin peroxidase) (Thioredoxin-dependent peroxiredoxin)	0.1			78	1	102.5	N
P80864	BSU29490	tpx	Thiol peroxidase (Tpx) (EC 1.11.1.24) (Peroxiredoxin tpx) (Prx) (Thioredoxin peroxidase) (Thioredoxin-dependent peroxiredoxin)	0.1			68	1	52.716	N
P39795	BSU07810	treA	Trehalose-6-phosphate hydrolase (EC 3.2.1.93) (Alpha,alpha-phosphotrehalase) (Phospho-alpha-(1-1)-glucosidase)	0.3			490	1	65.535	N
P39795	BSU07810	treA	Trehalose-6-phosphate hydrolase (EC 3.2.1.93) (Alpha,alpha-phosphotrehalase) (Phospho-alpha-(1-1)-glucosidase)	0.3			390	1	99.752	N
P39795	BSU07810	treA	Trehalose-6-phosphate hydrolase (EC 3.2.1.93) (Alpha,alpha-phosphotrehalase) (Phospho-alpha-(1-1)-glucosidase)	0.3			448	1	64.265	N
P39795	BSU07810	treA	Trehalose-6-phosphate hydrolase (EC 3.2.1.93) (Alpha,alpha-phosphotrehalase) (Phospho-alpha-(1-1)-glucosidase)	0.3			206	1	73.499	N
P39795	BSU07810	treA	Trehalose-6-phosphate hydrolase (EC 3.2.1.93) (Alpha,alpha-phosphotrehalase) (Phospho-alpha-(1-1)-glucosidase)	0.3			240	1	44.71	N
P39794	BSU07800	treP	PTS system trehalose-specific EIIBC component (EIIBC-Tre) (EII-Tre) [Includes: Trehalose-specific phosphotransferase enzyme IIB component (EC 2.7.1.201) (PTS system trehalose-specific EIIB component); Trehalose permease IIC component (PTS system trehalose-specific EIIC component)]	0.2			20	1	108.08	N
P39796	BSU07820	treR	HTH-type transcriptional regulator TreR (Trehalose operon repressor)	0.9			118	1	62.891	N
O31457	BSU02330	trhO	tRNA uridine(34) hydroxylase (EC 1.14.-.-) (tRNA hydroxylation protein O)	0.3			136	1	75.739	N
O32034	BSU27340	trhP1	tRNA hydroxylation protein P1 (EC 3.4.-.-)	0.4			107	1	67.864	N
O32035	BSU27350	trhP2	tRNA hydroxylation protein P2 (EC 3.4.-.-)	0.3			273	1	106.82	N
O34522	BSU29900	trmB	tRNA (guanine-N(7)-)-methyltransferase (EC 2.1.1.33) (BsTrmB) (tRNA (guanine(46)-N(7))-methyltransferase) (tRNA(m7G46)-methyltransferase)	0.2			94	1	51.819	N
O34522	BSU29900	trmB	tRNA (guanine-N(7)-)-methyltransferase (EC 2.1.1.33) (BsTrmB) (tRNA (guanine(46)-N(7))-methyltransferase) (tRNA(m7G46)-methyltransferase)	0.2			115	1	47.844	N
P39815	BSU16130	trmFO	Methylenetetrahydrofolate--tRNA-(uracil-5-)-methyltransferase TrmFO (EC 2.1.1.74) (Folate-dependent tRNA (uracil-5-)-methyltransferase) (Folate-dependent tRNA(M-5-U54)-methyltransferase)	0.4			301	1	64.121	N
P80700	BSU16500	tsf	Elongation factor Ts (EF-Ts)	0.1			188	1	78.903	N
P80700	BSU16500	tsf	Elongation factor Ts (EF-Ts)	0.1			203	1	147.62	N
P80700	BSU16500	tsf	Elongation factor Ts (EF-Ts)	0.1			102	1	183.64	N
P80700	BSU16500	tsf	Elongation factor Ts (EF-Ts)	0.1			76	1	151.98	N
P80700	BSU16500	tsf	Elongation factor Ts (EF-Ts)	0.1			169	1	44.734	N
P80700	BSU16500	tsf	Elongation factor Ts (EF-Ts)	0.1			232	1	137.45	N
P80700	BSU16500	tsf	Elongation factor Ts (EF-Ts)	0.1			117	1	95.954	N
P33166	BSU01130	tuf	Elongation factor Tu (EF-Tu) (P-40)	0.1			328	1	51.927	N
P33166	BSU01130	tuf	Elongation factor Tu (EF-Tu) (P-40)	0.1			276	1	152.38	N
P33166	BSU01130	tuf	Elongation factor Tu (EF-Tu) (P-40)	0.1			126	1	112.11	N
P33166	BSU01130	tuf	Elongation factor Tu (EF-Tu) (P-40)	0.1			137	1	134.51	N
P33166	BSU01130	tuf	Elongation factor Tu (EF-Tu) (P-40)	0.1			14	1	76.151	N
P22326	BSU29670	tyrS1	Tyrosine--tRNA ligase 1 (EC 6.1.1.1) (Tyrosyl-tRNA synthetase 1) (TyrRS 1)	0.2			3	1	77.662	N
Q05873	BSU28090	valS	Valine--tRNA ligase (EC 6.1.1.9) (Valyl-tRNA synthetase) (ValRS)	0.2			589	1	132.59	N
Q05873	BSU28090	valS	Valine--tRNA ligase (EC 6.1.1.9) (Valyl-tRNA synthetase) (ValRS)	0.2			779	1	61.582	N
Q05873	BSU28090	valS	Valine--tRNA ligase (EC 6.1.1.9) (Valyl-tRNA synthetase) (ValRS)	0.2			616	1	98.74	N
Q05873	BSU28090	valS	Valine--tRNA ligase (EC 6.1.1.9) (Valyl-tRNA synthetase) (ValRS)	0.2			745	1	52.725	N
Q05873	BSU28090	valS	Valine--tRNA ligase (EC 6.1.1.9) (Valyl-tRNA synthetase) (ValRS)	0.2			256	1	56.563	N
Q05873	BSU28090	valS	Valine--tRNA ligase (EC 6.1.1.9) (Valyl-tRNA synthetase) (ValRS)	0.2			386	1	79.201	N
Q45614	BSU40400	walK	Sensor histidine kinase WalK (EC 2.7.13.3)	0.4			383	1	59.155	N
Q07833	BSU39230	wapA	tRNA nuclease WapA (EC 3.1.-.-) (Cell wall-associated polypeptide CWBP200) (CWBP200) (RNase WapA) (Toxin WapA) (Wall-associated protein)	0.1			1379	1	43.083	N
Q07833	BSU39230	wapA	tRNA nuclease WapA (EC 3.1.-.-) (Cell wall-associated polypeptide CWBP200) (CWBP200) (RNase WapA) (Toxin WapA) (Wall-associated protein)	0.1			732	1	74.849	N
Q07833	BSU39230	wapA	tRNA nuclease WapA (EC 3.1.-.-) (Cell wall-associated polypeptide CWBP200) (CWBP200) (RNase WapA) (Toxin WapA) (Wall-associated protein)	0.1			1908	1	43.77	N
Q07833	BSU39230	wapA	tRNA nuclease WapA (EC 3.1.-.-) (Cell wall-associated polypeptide CWBP200) (CWBP200) (RNase WapA) (Toxin WapA) (Wall-associated protein)	0.1			1974	1	62.408	N
Q07833	BSU39230	wapA	tRNA nuclease WapA (EC 3.1.-.-) (Cell wall-associated polypeptide CWBP200) (CWBP200) (RNase WapA) (Toxin WapA) (Wall-associated protein)	0.1			1076	1	87.184	N
Q07836	BSU39220	wapI	Immunity protein WapI	0.1			131	1	114.72	N
P54423	BSU10770	wprA	Cell wall-associated protease (EC 3.4.21.-) [Cleaved into: Cell wall-associated polypeptide CWBP23 (CWBP23); Cell wall-associated polypeptide CWBP52 (CWBP52)]	0.2			86	1	103.08	N
P37560	BSU00630	yabR	Uncharacterized protein YabR	0.1			47	1	95.741	N
P37560	BSU00630	yabR	Uncharacterized protein YabR	0.1			18	1	83.022	N
P37560	BSU00630	yabR	Uncharacterized protein YabR	0.1			41	1	123.19	N
P37560	BSU00630	yabR	Uncharacterized protein YabR	0.1			62	1	134.77	N
P81100	BSU02890	yceC	Stress response protein SCP2	0.1			120	1	80.688	N
P81100	BSU02890	yceC	Stress response protein SCP2	0.1			75	1	68.735	N
P80875	BSU02900	yceD	General stress protein 16U (GSP16U)	0.1			17	1	94.114	N
P80875	BSU02900	yceD	General stress protein 16U (GSP16U)	0.1			32	1	69.01	N
O34384	BSU02910	yceE	Uncharacterized protein YceE	0.1			32	1	48.741	N
O34384	BSU02910	yceE	Uncharacterized protein YceE	0.1			171	1	90.453	N
O34833	BSU02940	yceH	Uncharacterized protein YceH	0.1			149	1	82.908	N
P37518	BSU40920	ychF	Ribosome-binding ATPase YchF	0.2			207	1	123.72	N
P94421	BSU03830	yclQ	Petrobactin-binding protein YclQ	0.1			247	1	59.426	N
P94431	BSU03940	ycnI	Uncharacterized protein YcnI	0.1			151	1	59.691	N
P42958	BSU04000	ycsA	Probable tartrate dehydrogenase/decarboxylase (TDH) (EC 1.1.1.93) (EC 4.1.1.73) (D-malate dehydrogenase [decarboxylating]) (EC 1.1.1.83)	0.5			134	1	50.088	N
P42962	BSU04040	ycsE	5-amino-6-(5-phospho-D-ribitylamino)uracil phosphatase YcsE (EC 3.1.3.104)	#N/A			146	1	44.089	N
Q08792	BSU03560	ycxD	Uncharacterized HTH-type transcriptional regulator YcxD (ORF8)	0.8			424	1	66.621	N
Q08792	BSU03560	ycxD	Uncharacterized HTH-type transcriptional regulator YcxD (ORF8)	0.8			427	1	66.621	N
P96641	BSU04930	yddD	Uncharacterized protein YddD	0.8			165	1	40.044	N
P96648	BSU05000	yddK	Uncharacterized protein YddK (EC 3.2.2.6)	0.4			236	1	54.524	N
P96704	BSU05620	ydgF	Uncharacterized transporter YdgF	0.4			325	1	62.408	N
O31567	BSU08440	yfiY	Probable siderophore-binding lipoprotein YfiY	0.1			311	1	70.281	N
O31567	BSU08440	yfiY	Probable siderophore-binding lipoprotein YfiY	0.1			292	1	51.819	N
O34579	BSU07930	yfkD	Uncharacterized protein YfkD	0.8			175	1	54.805	N
O34579	BSU07930	yfkD	Uncharacterized protein YfkD	0.8			34	1	45.829	N
O34313	BSU07840	yfkN	Trifunctional nucleotide phosphoesterase protein YfkN [Includes: 2',3'-cyclic-nucleotide 2'-phosphodiesterase/3'-nucleotidase (EC 3.1.3.6) (EC 3.1.4.16); 5'-nucleotidase (EC 3.1.3.5)]	0.5			540	1	40.021	N
O34475	BSU07830	yfkO	Putative NAD(P)H nitroreductase YfkO (EC 1.-.-.-)	0.2			24	1	53.163	N
O34348	BSU07520	yfmC	Fe(3+)-citrate-binding protein YfmC (Ferric-citrate-binding protein)	0.1			196	1	41.399	N
O34348	BSU07520	yfmC	Fe(3+)-citrate-binding protein YfmC (Ferric-citrate-binding protein)	0.1			168	1	108.98	N
O34348	BSU07520	yfmC	Fe(3+)-citrate-binding protein YfmC (Ferric-citrate-binding protein)	0.1			258	1	63.212	N
O34348	BSU07520	yfmC	Fe(3+)-citrate-binding protein YfmC (Ferric-citrate-binding protein)	0.1			111	1	111.67	N
O34348	BSU07520	yfmC	Fe(3+)-citrate-binding protein YfmC (Ferric-citrate-binding protein)	0.1			185	1	68.481	N
O34812	BSU07450	yfmJ	Putative NADP-dependent oxidoreductase YfmJ (EC 1.-.-.-)	0.2			314	1	42.908	N
P54598	BSU09150	yhcN	Probable spore germination lipoprotein YhcN	0.3			150	1	110.98	N
O07609	BSU10260	yhfK	Uncharacterized sugar epimerase YhfK (EC 4.-.-.-)	0.2			52	1	103.92	N
O06735	BSU10910	yisZ	Probable adenylyl-sulfate kinase (EC 2.7.1.25) (APS kinase) (ATP adenosine-5'-phosphosulfate 3'-phosphotransferase) (Adenosine-5'-phosphosulfate kinase)	0.6			45	1	52.937	N
O31605	BSU11540	yjbG	Oligoendopeptidase F homolog (EC 3.4.24.-)	0.2			413	1	60.961	N
O31605	BSU11540	yjbG	Oligoendopeptidase F homolog (EC 3.4.24.-)	0.2			108	1	55.676	N
O31605	BSU11540	yjbG	Oligoendopeptidase F homolog (EC 3.4.24.-)	0.2			513	1	51.286	N
P80861	BSU12290	yjlD	NADH dehydrogenase-like protein YjlD (EC 1.6.99.-) (Glucose starvation-inducible protein 5) (GSI5)	0.1			360	1	86.114	N
P80861	BSU12290	yjlD	NADH dehydrogenase-like protein YjlD (EC 1.6.99.-) (Glucose starvation-inducible protein 5) (GSI5)	0.1			54	1	113.18	N
P80861	BSU12290	yjlD	NADH dehydrogenase-like protein YjlD (EC 1.6.99.-) (Glucose starvation-inducible protein 5) (GSI5)	0.1			133	1	120.62	N
P80861	BSU12290	yjlD	NADH dehydrogenase-like protein YjlD (EC 1.6.99.-) (Glucose starvation-inducible protein 5) (GSI5)	0.1			36	1	92.191	N
P80861	BSU12290	yjlD	NADH dehydrogenase-like protein YjlD (EC 1.6.99.-) (Glucose starvation-inducible protein 5) (GSI5)	0.1			250	1	124.17	N
O31716	BSU14430	ykpA	Uncharacterized ABC transporter ATP-binding protein YkpA	0.2			438	1	84.615	N
O31716	BSU14430	ykpA	Uncharacterized ABC transporter ATP-binding protein YkpA	0.2			275	1	76.774	N
O31716	BSU14430	ykpA	Uncharacterized ABC transporter ATP-binding protein YkpA	0.2			21	1	67.207	N
O31689	BSU13860	ykvY	Putative dipeptidase YkvY (EC 3.4.13.-)	0.3			141	1	64.82	N
O31766	BSU16860	ymfH	Uncharacterized zinc protease YmfH (EC 3.4.24.-)	0.3			162	1	49.189	N
O31771	BSU16910	ymfM	Uncharacterized membrane protein YmfM	0.2			281	1	51.066	N
O34669	BSU19210	yocH	Cell wall-binding protein YocH	0.4			176	1	55.776	N
P81102	BSU19550	yodC	Putative NAD(P)H nitroreductase YodC (EC 1.-.-.-)	0.1			20	1	105.96	N
O34866	BSU19620	yodJ	Putative carboxypeptidase YodJ (EC 3.4.-.-)	0.3			163	1	42.083	N
O31980	BSU21390	yomE	SPbeta prophage-derived uncharacterized protein YomE	0.9			458	1	56.51	N
P54160	BSU22020	ypbS	Uncharacterized protein YpbS	0.3			27	1	47.532	N
P38494	BSU22880	ypfD	30S ribosomal protein S1 homolog	0.1			379	1	102.33	N
P38494	BSU22880	ypfD	30S ribosomal protein S1 homolog	0.1			37	1	127.71	N
P38494	BSU22880	ypfD	30S ribosomal protein S1 homolog	0.1			333	1	189.18	N
P38494	BSU22880	ypfD	30S ribosomal protein S1 homolog	0.1			248	1	79.201	N
P54170	BSU21860	yphP	UPF0403 protein YphP	0.1			36	1	119.37	N
P50840	BSU22170	ypsC	Putative RNA methyltransferase YpsC (EC 2.1.1.-)	0.4			295	1	101.38	N
P54466	BSU25380	yqfA	UPF0365 protein YqfA	0.1			102	1	76.282	N
P54466	BSU25380	yqfA	UPF0365 protein YqfA	0.1			303	1	80.469	N
P54519	BSU24330	yqhY	Uncharacterized protein YqhY	0.2			46	1	55.314	N
P54524	BSU24210	yqiG	Probable NADH-dependent flavin oxidoreductase YqiG (EC 1.-.-.-)	0.4			146	1	157.66	N
P54531	BSU24080	yqiT	Leucine dehydrogenase (LeuDH) (EC 1.4.1.9)	0.2			316	1	71.806	N
P54531	BSU24080	yqiT	Leucine dehydrogenase (LeuDH) (EC 1.4.1.9)	0.2			50	1	66.673	N
P54542	BSU23910	yqjE	Uncharacterized protein YqjE	0.2			225	1	118.71	N
P54572	BSU23550	yqkJ	Probable NAD-dependent malic enzyme 1 (NAD-ME 1) (EC 1.1.1.38)	0.3			285	1	70.98	N
P54572	BSU23550	yqkJ	Probable NAD-dependent malic enzyme 1 (NAD-ME 1) (EC 1.1.1.38)	0.3			298	1	68.422	N
P54572	BSU23550	yqkJ	Probable NAD-dependent malic enzyme 1 (NAD-ME 1) (EC 1.1.1.38)	0.3			393	1	53.033	N
O06006	BSU27020	yraA	Putative cysteine protease YraA (EC 3.2.-.-)	0.1			95	1	95.957	N
P94558	BSU28360	ysnA	dITP/XTP pyrophosphatase (EC 3.6.1.66) (Non-canonical purine NTP pyrophosphatase) (Non-standard purine NTP pyrophosphatase) (Nucleoside-triphosphate diphosphatase) (Nucleoside-triphosphate pyrophosphatase) (NTPase)	0.2			180	1	44.616	N
O35005	BSU30410	ytrF	ABC transporter permease YtrF	0.3			123	1	48.561	N
O34962	BSU29220	ytsJ	Probable NAD-dependent malic enzyme 4 (NAD-ME 4) (EC 1.1.1.38)	0.1			337	1	52.937	N
O34962	BSU29220	ytsJ	Probable NAD-dependent malic enzyme 4 (NAD-ME 4) (EC 1.1.1.38)	0.1			52	1	74.364	N
O34962	BSU29220	ytsJ	Probable NAD-dependent malic enzyme 4 (NAD-ME 4) (EC 1.1.1.38)	0.1			131	1	92.886	N
Q795Q5	BSU30360	yttA	Uncharacterized membrane protein YttA	0.2			154	1	47.067	N
O05236	BSU31410	yugG	Uncharacterized HTH-type transcriptional regulator YugG	0.2			115	1	50.04	N
P80870	BSU31390	yugI	General stress protein 13 (GSP13)	0.1			123	1	135.14	N
P80870	BSU31390	yugI	General stress protein 13 (GSP13)	0.1			49	1	180.84	N
O05239	BSU31370	yugJ	Probable NADH-dependent butanol dehydrogenase 1 (EC 1.1.1.-)	0.2			71	1	78.932	N
O05239	BSU31370	yugJ	Probable NADH-dependent butanol dehydrogenase 1 (EC 1.1.1.-)	0.2			179	1	68.972	N
O05240	BSU31360	yugK	Probable NADH-dependent butanol dehydrogenase 2 (EC 1.1.1.-)	0.4			300	1	53.327	N
O05268	BSU32110	yumC	Ferredoxin--NADP reductase 2 (FNR 2) (Fd-NADP(+) reductase 2) (EC 1.18.1.2)	0.1			245	1	84.107	N
O05268	BSU32110	yumC	Ferredoxin--NADP reductase 2 (FNR 2) (Fd-NADP(+) reductase 2) (EC 1.18.1.2)	0.1			106	1	73.781	N
O05268	BSU32110	yumC	Ferredoxin--NADP reductase 2 (FNR 2) (Fd-NADP(+) reductase 2) (EC 1.18.1.2)	0.1			265	1	57.463	N
O05268	BSU32110	yumC	Ferredoxin--NADP reductase 2 (FNR 2) (Fd-NADP(+) reductase 2) (EC 1.18.1.2)	0.1			276	1	77.681	N
O05268	BSU32110	yumC	Ferredoxin--NADP reductase 2 (FNR 2) (Fd-NADP(+) reductase 2) (EC 1.18.1.2)	0.1			294	1	96.153	N
O32118	BSU32210	yuzD	Putative disulfide oxidoreductase YuzD	0.6			89	1	72.234	N
O32210	BSU33400	yvgN	Glyoxal reductase (GR) (EC 1.1.1.-) (Methylglyoxal reductase) (EC 1.1.1.283)	0.1			262	1	179.28	N
O34628	BSU35120	yvlB	Uncharacterized protein YvlB	0.1			310	1	78.661	N
O34628	BSU35120	yvlB	Uncharacterized protein YvlB	0.1			292	1	60.093	N
O34805	BSU33180	yvrC	Uncharacterized ABC transporter substrate-binding lipoprotein YvrC	0.3			249	1	48.998	N
P28368	BSU35310	yvyD	Ribosome hibernation promotion factor (HPF) (Hst23) (Putative sigma-54 modulation protein) (SigL modulation protein)	0.1			47	1	56.258	N
P39586	BSU38370	ywbC	Uncharacterized protein YwbC	0.2			16	1	58.671	N
P54941	BSU39610	yxeB	Iron(3+)-hydroxamate-binding protein YxeB (Ferric hydroxamate uptake protein YxeB) (Iron(III)-hydroxamate-binding protein YxeB)	0.1			319	1	50.039	N
P54941	BSU39610	yxeB	Iron(3+)-hydroxamate-binding protein YxeB (Ferric hydroxamate uptake protein YxeB) (Iron(III)-hydroxamate-binding protein YxeB)	0.1			142	1	42.708	N
P94356	BSU38850	yxkC	Uncharacterized protein YxkC	0.1			173	1	74.92	N
P94356	BSU38850	yxkC	Uncharacterized protein YxkC	0.1			127	1	138.09	N
P94356	BSU38850	yxkC	Uncharacterized protein YxkC	0.1			47	1	100.25	N
P37494	BSU40620	yybJ	Uncharacterized ABC transporter ATP-binding protein YybJ	0.2			107	1	54.871	N
P54547	BSU23850	zwf	Glucose-6-phosphate 1-dehydrogenase (G6PD) (EC 1.1.1.49) (Vegetative protein 11) (VEG11)	0.1			196	1	116.77	N
P54547	BSU23850	zwf	Glucose-6-phosphate 1-dehydrogenase (G6PD) (EC 1.1.1.49) (Vegetative protein 11) (VEG11)	0.1			327	1	86.512	N
P54547	BSU23850	zwf	Glucose-6-phosphate 1-dehydrogenase (G6PD) (EC 1.1.1.49) (Vegetative protein 11) (VEG11)	0.1			464	1	79.614	N
P08874	BSU00370	abrB	Transition state regulatory protein AbrB	0.1			66	0.999999	69.024	N
P54420	BSU30540	asnB	Asparagine synthetase [glutamine-hydrolyzing] 1 (EC 6.3.5.4)	0.2			565	0.999999	145	N
P37809	BSU36810	atpD	ATP synthase subunit beta (EC 7.1.2.2) (ATP synthase F1 sector subunit beta) (F-ATPase subunit beta) (Vegetative protein 31) (VEG31)	0.1			253	0.999999	92.856	N
P37811	BSU36840	atpH	ATP synthase subunit delta (ATP synthase F(1) sector subunit delta) (F-type ATPase subunit delta) (F-ATPase subunit delta)	0.1			45	0.999999	94.804	N
O07631	BSU14770	bipA	50S ribosomal subunit assembly factor BipA (EC 3.6.5.-) (GTP-binding protein BipA)	0.2			62	0.999999	95.909	N
P37571	BSU00860	clpC	Negative regulator of genetic competence ClpC/MecB	0.1			659	0.999999	79.311	N
P50866	BSU28220	clpX	ATP-dependent Clp protease ATP-binding subunit ClpX	0.1			97	0.999999	84.359	N
O34925	BSU19630	deoD	Purine nucleoside phosphorylase DeoD-type (PNP) (EC 2.4.2.1) (Purine nucleoside phosphorylase II) (PU-NPase II)	0.1			35	0.999999	99.055	N
P17820	BSU25470	dnaK	Chaperone protein DnaK (HSP70) (Heat shock 70 kDa protein) (Heat shock protein 70)	0.1			33	0.999999	149.65	N
O30509	BSU06690	gatB	Aspartyl/glutamyl-tRNA(Asn/Gln) amidotransferase subunit B (Asp/Glu-ADT subunit B) (EC 6.3.5.-)	0.1			80	0.999999	64.73	N
P30950	BSU28130	hemB	Delta-aminolevulinic acid dehydratase (ALAD) (ALADH) (EC 4.2.1.24) (Porphobilinogen synthase)	0.2			140	0.999999	76.733	N
P39126	BSU29130	icd	Isocitrate dehydrogenase [NADP] (IDH) (EC 1.1.1.42) (IDP) (NADP(+)-specific ICDH) (Oxalosuccinate decarboxylase)	0.1			267	0.999999	118.87	N
P36430	BSU30320	leuS	Leucine--tRNA ligase (EC 6.1.1.4) (Leucyl-tRNA synthetase) (LeuRS)	0.2			167	0.999999	77.873	N
P23966	BSU30800	menB	1,4-dihydroxy-2-naphthoyl-CoA synthase (DHNA-CoA synthase) (EC 4.1.3.36)	0.1			93	0.999999	71.501	N
P18579	BSU15230	murB	UDP-N-acetylenolpyruvoylglucosamine reductase (EC 1.3.1.98) (UDP-N-acetylmuramate dehydrogenase)	0.2			19	0.999999	74.29	N
P24141	BSU11430	oppA	Oligopeptide-binding protein OppA (Stage 0 sporulation protein KA)	0.1			306	0.999999	69.729	N
P21881	BSU14580	pdhA	Pyruvate dehydrogenase E1 component subunit alpha (EC 1.2.4.1) (S complex, 42 kDa subunit) (Vegetative protein 220) (VEG220)	0.1			189	0.999999	131.04	N
P21880	BSU14610	pdhD	Dihydrolipoyl dehydrogenase (EC 1.8.1.4) (Dihydrolipoamide dehydrogenase) (E3 component of pyruvate complex) (S complex, 50 kDa subunit)	0.1			278	0.999999	85.146	N
P39793	BSU22320	ponA	Penicillin-binding protein 1A/1B (PBP1) [Includes: Penicillin-insensitive transglycosylase (EC 2.4.1.129) (Peptidoglycan TGase); Penicillin-sensitive transpeptidase (EC 3.4.16.4) (DD-transpeptidase)]	0.2			578	0.999999	77.279	N
P39646	BSU37660	pta	Phosphate acetyltransferase (EC 2.3.1.8) (Phosphotransacetylase) (Vegetative protein 43) (VEG43)	0.1			187	0.999999	76.476	N
P13242	BSU37150	pyrG	CTP synthase (EC 6.3.4.2) (Cytidine 5'-triphosphate synthase) (Cytidine triphosphate synthetase) (CTP synthetase) (CTPS) (UTP--ammonia ligase)	0.2			244	0.999999	73.448	N
O31760	BSU16780	rnjB	Ribonuclease J2 (RNase J2) (EC 3.1.-.-)	0.2			8	0.999999	69.383	N
P20277	BSU01440	rplQ	50S ribosomal protein L17 (BL15) (BL21)	0.1			68	0.999999	187.37	N
P42060	BSU01210	rplV	50S ribosomal protein L22	0.1			37	0.999999	73.037	N
P21473	BSU16680	rpsO	30S ribosomal protein S15 (BS18)	0.1			13	0.999999	84.743	N
P80700	BSU16500	tsf	Elongation factor Ts (EF-Ts)	0.1			93	0.999999	210.68	N
Q07833	BSU39230	wapA	tRNA nuclease WapA (EC 3.1.-.-) (Cell wall-associated polypeptide CWBP200) (CWBP200) (RNase WapA) (Toxin WapA) (Wall-associated protein)	0.1			763	0.999999	60.448	N
Q07833	BSU39230	wapA	tRNA nuclease WapA (EC 3.1.-.-) (Cell wall-associated polypeptide CWBP200) (CWBP200) (RNase WapA) (Toxin WapA) (Wall-associated protein)	0.1			1716	0.999999	66.871	N
P81100	BSU02890	yceC	Stress response protein SCP2	0.1			49	0.999999	59.469	N
O31716	BSU14430	ykpA	Uncharacterized ABC transporter ATP-binding protein YkpA	0.2			401	0.999999	85.362	N
O05268	BSU32110	yumC	Ferredoxin--NADP reductase 2 (FNR 2) (Fd-NADP(+) reductase 2) (EC 1.18.1.2)	0.1			331	0.999999	59.898	N
P09339	BSU18000	citB	Aconitate/2-methylaconitate hydratase (EC 4.2.1.-) (EC 4.2.1.3) (Aconitate hydratase A) (ACN) (Aconitase) (Iron-responsive protein-like) (IRP-like) (RNA-binding protein)	0.1			821	0.999998	57.328	N
P32081	BSU09100	cspB	Cold shock protein CspB (Major cold shock protein)	0.1			62	0.999998	138.23	N
P08750	BSU00100	dacA	D-alanyl-D-alanine carboxypeptidase DacA (CPase) (DD-carboxypeptidase) (DD-peptidase) (EC 3.4.16.4) (Penicillin-binding protein 5) (PBP-5)	0.1			170	0.999998	80.165	N
P71017	BSU31050	gbsB	Choline dehydrogenase (EC 1.1.1.-) (Alcohol dehydrogenase)	0.5			338	0.999998	72.103	N
P39148	BSU36900	glyA	Serine hydroxymethyltransferase (SHMT) (Serine methylase) (EC 2.1.2.1)	0.1			310	0.999998	113.4	N
O34385	BSU30770	mntA	Manganese-binding lipoprotein MntA	0.4			47	0.999998	118.22	N
P20964	BSU27920	obg	GTPase Obg (EC 3.6.5.-) (GTP-binding protein Obg) (OrfA) (Spo0B-associated GTP-binding protein)	0.3			282	0.999998	70.622	N
P29726	BSU40420	purA	Adenylosuccinate synthetase (AMPSase) (AdSS) (EC 6.3.4.4) (IMP--aspartate ligase)	0.1			95	0.999998	62.546	N
P13242	BSU37150	pyrG	CTP synthase (EC 6.3.4.2) (Cytidine 5'-triphosphate synthase) (Cytidine triphosphate synthetase) (CTP synthetase) (CTPS) (UTP--ammonia ligase)	0.2			84	0.999998	110.81	N
P54547	BSU23850	zwf	Glucose-6-phosphate 1-dehydrogenase (G6PD) (EC 1.1.1.49) (Vegetative protein 11) (VEG11)	0.1			205	0.999998	59.185	N
P37809	BSU36810	atpD	ATP synthase subunit beta (EC 7.1.2.2) (ATP synthase F1 sector subunit beta) (F-ATPase subunit beta) (Vegetative protein 31) (VEG31)	0.1			97	0.999997	125.23	N
A9LHR4		cpn60	60 kDa chaperonin (Fragment)	0.1			21	0.999997	84.213	N
P37476	BSU00690	ftsH	ATP-dependent zinc metalloprotease FtsH (EC 3.4.24.-) (Cell division protease FtsH)	0.1			354	0.999997	56.936	N
P28598	BSU06030	groL	60 kDa chaperonin (GroEL protein) (Protein Cpn60) (Stress protein H5)	0.1			111	0.999997	84.213	N
Q45477	BSU15430	ileS	Isoleucine--tRNA ligase (EC 6.1.1.5) (Isoleucyl-tRNA synthetase) (IleRS)	0.1			271	0.999997	88.168	N
P18579	BSU15230	murB	UDP-N-acetylenolpyruvoylglucosamine reductase (EC 1.3.1.98) (UDP-N-acetylmuramate dehydrogenase)	0.2			229	0.999997	92.039	N
P54476	BSU25130	nfo	Probable endonuclease 4 (EC 3.1.21.2) (Endodeoxyribonuclease IV) (Endonuclease IV)	0.4			131	0.999997	106.93	N
P17922	BSU28630	pheT	Phenylalanine--tRNA ligase beta subunit (EC 6.1.1.20) (Phenylalanyl-tRNA synthetase beta subunit) (PheRS)	0.2			568	0.999997	64.507	N
P45872	BSU37010	prfA	Peptide chain release factor 1 (RF-1)	0.2			16	0.999997	59.513	N
P28367	BSU35290	prfB	Peptide chain release factor 2 (RF-2)	0.2			268	0.999997	82.707	N
P14193	BSU00510	prs	Ribose-phosphate pyrophosphokinase (RPPK) (EC 2.7.6.1) (5-phospho-D-ribosyl alpha-1-diphosphate) (Phosphoribosyl diphosphate synthase) (Phosphoribosyl pyrophosphate synthase) (P-Rib-PP synthase) (PPRibP synthase) (PRPP synthase) (PRPPase)	0.1			3	0.999997	106.04	N
Q02115	BSU35650	tagU	Polyisoprenyl-teichoic acid--peptidoglycan teichoic acid transferase TagU (EC 2.7.8.-) (Membrane-bound protein LytR)	0.2			248	0.999997	119.46	N
O31457	BSU02330	trhO	tRNA uridine(34) hydroxylase (EC 1.14.-.-) (tRNA hydroxylation protein O)	0.3			307	0.999997	67.456	N
O34872	BSU30690	ytiB	Putative carbonic anhydrase YtiB (EC 4.2.1.1) (Carbonate dehydratase)	0.2			11	0.999997	67.214	N
O34962	BSU29220	ytsJ	Probable NAD-dependent malic enzyme 4 (NAD-ME 4) (EC 1.1.1.38)	0.1			62	0.999997	85.19	N
O34962	BSU29220	ytsJ	Probable NAD-dependent malic enzyme 4 (NAD-ME 4) (EC 1.1.1.38)	0.1			139	0.999997	74.456	N
P80239	BSU40090	ahpC	Alkyl hydroperoxide reductase C (EC 1.11.1.26) (General stress protein 22) (Peroxiredoxin) (Thioredoxin peroxidase)	0.1			137	0.999996	208.47	N
P54420	BSU30540	asnB	Asparagine synthetase [glutamine-hydrolyzing] 1 (EC 6.3.5.4)	0.2			226	0.999996	69.258	N
P96614	BSU04580	cshA	DEAD-box ATP-dependent RNA helicase CshA (EC 3.6.4.13)	0.1			66	0.999996	139.88	N
P37887	BSU00730	cysK	Cysteine synthase (CSase) (EC 2.5.1.47) (O-acetylserine (thiol)-lyase) (OAS-TL) (Superoxide-inducible protein 11) (SOI11)	0.1			6	0.999996	58.246	N
P51831	BSU15910	fabG	3-oxoacyl-[acyl-carrier-protein] reductase FabG (EC 1.1.1.100) (3-ketoacyl-acyl carrier protein reductase) (Beta-Ketoacyl-acyl carrier protein reductase) (Beta-ketoacyl-ACP reductase)	0.1			65	0.999996	76.228	N
P09124	BSU33940	gapA	Glyceraldehyde-3-phosphate dehydrogenase 1 (GAPDH) (EC 1.2.1.12) (NAD-dependent glyceraldehyde-3-phosphate dehydrogenase)	0.1			321	0.999996	87.363	N
P54381	BSU25260	glyS	Glycine--tRNA ligase beta subunit (EC 6.1.1.14) (Glycyl-tRNA synthetase beta subunit) (GlyRS)	0.2			342	0.999996	58.815	N
P21879	BSU00090	guaB	Inosine-5'-monophosphate dehydrogenase (IMP dehydrogenase) (IMPD) (IMPDH) (EC 1.1.1.205) (Superoxide-inducible protein 12) (SOI12)	0.1			75	0.999996	79.875	N
P37949	BSU25510	lepA	Elongation factor 4 (EF-4) (EC 3.6.5.n1) (Ribosomal back-translocase LepA)	0.3			67	0.999996	91.626	N
P18579	BSU15230	murB	UDP-N-acetylenolpyruvoylglucosamine reductase (EC 1.3.1.98) (UDP-N-acetylmuramate dehydrogenase)	0.2			260	0.999996	126.4	N
Q08432	BSU31440	patB	Cystathionine beta-lyase PatB (CBL) (EC 4.4.1.13) (Beta-cystathionase PatB) (Cysteine lyase PatB) (Cysteine-S-conjugate beta-lyase PatB)	0.4			237	0.999996	97.32	N
P17921	BSU28640	pheS	Phenylalanine--tRNA ligase alpha subunit (EC 6.1.1.20) (Phenylalanyl-tRNA synthetase alpha subunit) (PheRS)	0.2			70	0.999996	80.316	N
O32162	BSU32670	sufB	FeS cluster assembly protein SufB	0.1			131	0.999996	124.5	N
P96499	BSU35520	tagV	Polyisoprenyl-teichoic acid--peptidoglycan teichoic acid transferase TagV (EC 2.7.8.-)	0.2			316	0.999996	84.152	N
P39596	BSU38270	efeM	Probable iron uptake system component EfeM	0.2			58	0.999995	57.175	N
P13242	BSU37150	pyrG	CTP synthase (EC 6.3.4.2) (Cytidine 5'-triphosphate synthase) (Cytidine triphosphate synthetase) (CTP synthetase) (CTPS) (UTP--ammonia ligase)	0.2			330	0.999995	116.28	N
P54375	BSU25020	sodA	Superoxide dismutase [Mn] (EC 1.15.1.1) (General stress protein 24) (GSP24)	0.1			40	0.999995	129	N
O34943	BSU29820	ytpR	Putative tRNA-binding protein YtpR (Partial phenylalanyl-tRNA synthetase) (Partial PheRS) (pFRS)	0.1			119	0.999995	135.21	N
Q04796	BSU16770	dapA	4-hydroxy-tetrahydrodipicolinate synthase (HTPA synthase) (EC 4.3.3.7)	0.1			19	0.999994	62.717	N
P80868	BSU01120	fusA	Elongation factor G (EF-G) (Vegetative protein 19) (VEG19)	0.1			637	0.999994	113.25	N
P39773	BSU33910	gpmI	2,3-bisphosphoglycerate-independent phosphoglycerate mutase (BPG-independent PGAM) (Phosphoglyceromutase) (iPGM) (EC 5.4.2.12) (Vegetative protein 107) (VEG107)	0.1			23	0.999994	95.775	N
O31645	BSU12010	manP	PTS system mannose-specific EIIBCA component (EIIBCA-Man) (EII-Man) [Includes: Mannose-specific phosphotransferase enzyme IIB component (EC 2.7.1.191) (PTS system mannose-specific EIIB component); Mannose permease IIC component (PTS system mannose-specific EIIC component); Mannose-specific phosphotransferase enzyme IIA component (PTS system mannose-specific EIIA component)]	0.4			514	0.999994	66.972	N
P18579	BSU15230	murB	UDP-N-acetylenolpyruvoylglucosamine reductase (EC 1.3.1.98) (UDP-N-acetylmuramate dehydrogenase)	0.2			24	0.999994	84.566	N
P33166	BSU01130	tuf	Elongation factor Tu (EF-Tu) (P-40)	0.1			92	0.999994	232.2	N
P37810	BSU36820	atpG	ATP synthase gamma chain (ATP synthase F1 sector gamma subunit) (F-ATPase gamma subunit)	0.1			248	0.999993	69.198	N
P39773	BSU33910	gpmI	2,3-bisphosphoglycerate-independent phosphoglycerate mutase (BPG-independent PGAM) (Phosphoglyceromutase) (iPGM) (EC 5.4.2.12) (Vegetative protein 107) (VEG107)	0.1			274	0.999993	124.07	N
P16616	BSU28150	hemC	Porphobilinogen deaminase (PBG) (EC 2.5.1.61) (Hydroxymethylbilane synthase) (HMBS) (Pre-uroporphyrinogen synthase)	0.3			71	0.999993	104.84	N
P21882	BSU14590	pdhB	Pyruvate dehydrogenase E1 component subunit beta (EC 1.2.4.1) (S complex, 36 kDa subunit)	0.1			272	0.999993	100.31	N
P21471	BSU01150	rpsJ	30S ribosomal protein S10 (BS13)	0.1			78	0.999993	105.65	N
P28015	BSU00490	spoVG	Putative septation protein SpoVG (Stage V sporulation protein G)	0.1			78	0.999993	76.522	N
P37455	BSU40900	ssbA	Single-stranded DNA-binding protein A (SSB A)	0.1			34	0.999993	52.453	N
P80865	BSU16100	sucD	Succinate--CoA ligase [ADP-forming] subunit alpha (EC 6.2.1.5) (Succinyl-CoA synthetase subunit alpha) (SCS-alpha)	0.1			34	0.999993	84.046	N
P80875	BSU02900	yceD	General stress protein 16U (GSP16U)	0.1			134	0.999993	107.76	N
P26899	BSU23570	ansB	Aspartate ammonia-lyase (Aspartase) (EC 4.3.1.1)	0.3			229	0.999992	132.36	N
O07631	BSU14770	bipA	50S ribosomal subunit assembly factor BipA (EC 3.6.5.-) (GTP-binding protein BipA)	0.2			533	0.999992	57.175	N
P54716	BSU08180	glvA	Maltose-6'-phosphate glucosidase (EC 3.2.1.122) (6-phospho-alpha-D-glucosidase) (6-phosphoryl-O-alpha-D-glucopyranosyl:phosphoglucohydrolase)	0.4			434	0.999992	62.303	N
O32162	BSU32670	sufB	FeS cluster assembly protein SufB	0.1			281	0.999992	56.017	N
P96499	BSU35520	tagV	Polyisoprenyl-teichoic acid--peptidoglycan teichoic acid transferase TagV (EC 2.7.8.-)	0.2			269	0.999992	69.338	N
P19669	BSU37110	tal	Transaldolase (EC 2.2.1.2) (20 kDa phosphoprotein OrfU) (CSI9)	0.1			211	0.999992	67.153	N
P80860	BSU31350	pgi	Glucose-6-phosphate isomerase (GPI) (EC 5.3.1.9) (Phosphoglucose isomerase) (PGI) (Phosphohexose isomerase) (PHI) (Vegetative protein 54) (VEG54)	0.1			101	0.999991	103.88	N
P42919	BSU01190	rplB	50S ribosomal protein L2 (BL2)	0.1			204	0.999991	122.46	N
P54941	BSU39610	yxeB	Iron(3+)-hydroxamate-binding protein YxeB (Ferric hydroxamate uptake protein YxeB) (Iron(III)-hydroxamate-binding protein YxeB)	0.1			74	0.999991	60.348	N
Q04797	BSU16750	asd	Aspartate-semialdehyde dehydrogenase (ASA dehydrogenase) (ASADH) (EC 1.2.1.11) (Aspartate-beta-semialdehyde dehydrogenase)	0.1			324	0.999989	55.656	N
P27876	BSU33920	tpiA	Triosephosphate isomerase (TIM) (TPI) (EC 5.3.1.1) (Triose-phosphate isomerase)	0.1			140	0.999989	54.343	N
O31942	BSU21010	yonS	SPbeta prophage-derived uncharacterized lipoprotein YonS	0.3			155	0.999989	74.584	N
P42974	BSU40100	ahpF	NADH dehydrogenase (EC 7.1.1.2) (Alkyl hydroperoxide reductase)	0.1			253	0.999988	52.365	N
P26900	BSU23580	ansA	L-asparaginase 1 (L-ASNase 1) (EC 3.5.1.1) (L-asparagine amidohydrolase 1)	0.4			251	0.999988	89.634	N
P54375	BSU25020	sodA	Superoxide dismutase [Mn] (EC 1.15.1.1) (General stress protein 24) (GSP24)	0.1			46	0.999988	73.887	N
P09124	BSU33940	gapA	Glyceraldehyde-3-phosphate dehydrogenase 1 (GAPDH) (EC 1.2.1.12) (NAD-dependent glyceraldehyde-3-phosphate dehydrogenase)	0.1			33	0.999987	217.1	N
P21879	BSU00090	guaB	Inosine-5'-monophosphate dehydrogenase (IMP dehydrogenase) (IMPD) (IMPDH) (EC 1.1.1.205) (Superoxide-inducible protein 12) (SOI12)	0.1			280	0.999987	74.561	N
P08877	BSU13900	ptsH	Phosphocarrier protein HPr (Histidine-containing protein)	0.1			71	0.999987	109.08	N
P46354	BSU23490	punA	Purine nucleoside phosphorylase 1 (PNP 1) (EC 2.4.2.1) (Inosine phosphorylase) (Inosine-guanosine phosphorylase) (Purine nucleoside phosphorylase I) (PNP I) (Pu-NPase I)	0.1			116	0.999987	102.39	N
P17903	BSU04710	rsbV	Anti-sigma-B factor antagonist (Anti-anti-sigma-B factor)	0.1			4	0.999987	59.609	N
P80700	BSU16500	tsf	Elongation factor Ts (EF-Ts)	0.1			248	0.999987	105.46	N
P12425	BSU17460	glnA	Glutamine synthetase (GS) (EC 6.3.1.2) (Glutamate--ammonia ligase) (Glutamine synthetase I alpha) (GSI alpha)	0.1			34	0.999986	83.226	N
P22326	BSU29670	tyrS1	Tyrosine--tRNA ligase 1 (EC 6.1.1.1) (Tyrosyl-tRNA synthetase 1) (TyrRS 1)	0.2			24	0.999986	129.12	N
Q05873	BSU28090	valS	Valine--tRNA ligase (EC 6.1.1.9) (Valyl-tRNA synthetase) (ValRS)	0.2			285	0.999986	97.417	N
O06491	BSU06680	gatA	Glutamyl-tRNA(Gln) amidotransferase subunit A (Glu-ADT subunit A) (EC 6.3.5.7)	0.1			223	0.999985	72.489	N
P26907	BSU04400	gsiB	Glucose starvation-inducible protein B (General stress protein B)	0.1			83	0.999985	57.338	N
P23966	BSU30800	menB	1,4-dihydroxy-2-naphthoyl-CoA synthase (DHNA-CoA synthase) (EC 4.1.3.36)	0.1			223	0.999985	76.765	N
P42924	BSU01180	rplW	50S ribosomal protein L23	0.1			58	0.999985	88.596	N
P80875	BSU02900	yceD	General stress protein 16U (GSP16U)	0.1			95	0.999985	61.815	N
O31498	BSU06620	ligA	DNA ligase (EC 6.5.1.2) (Polydeoxyribonucleotide synthase [NAD(+)])	0.3			188	0.999984	61.235	N
P80886	BSU16090	sucC	Succinate--CoA ligase [ADP-forming] subunit beta (EC 6.2.1.5) (Succinyl-CoA synthetase subunit beta) (SCS-beta)	0.1			221	0.999984	64.82	N
P80866	BSU32710	sufC	Vegetative protein 296 (VEG296)	0.1			197	0.999984	75.96	N
P19465	BSU22780	folE	GTP cyclohydrolase 1 (EC 3.5.4.16) (GTP cyclohydrolase I) (GTP-CH-I)	0.2			25	0.999982	51.819	N
P14192	BSU00500	glmU	Bifunctional protein GlmU [Includes: UDP-N-acetylglucosamine pyrophosphorylase (EC 2.7.7.23) (N-acetylglucosamine-1-phosphate uridyltransferase); Glucosamine-1-phosphate N-acetyltransferase (EC 2.3.1.157)]	0.2			178	0.999982	68.82	N
A3F3E1		mtrA	GTP cyclohydrolase 1 (EC 3.5.4.16) (GTP cyclohydrolase I) (GTP-CH-I)	0.2			25	0.999982	51.819	N
O34499	BSU13010	pgl	6-phosphogluconolactonase (EC 3.1.1.31)	0.1			49	0.999982	58.511	N
P38021	BSU40340	rocD	Ornithine aminotransferase (OAT) (EC 2.6.1.13) (Ornithine--oxo-acid aminotransferase)	0.2			143	0.999981	67.645	N
P39596	BSU38270	efeM	Probable iron uptake system component EfeM	0.2			306	0.99998	92.932	N
P21881	BSU14580	pdhA	Pyruvate dehydrogenase E1 component subunit alpha (EC 1.2.4.1) (S complex, 42 kDa subunit) (Vegetative protein 220) (VEG220)	0.1			30	0.99998	169.93	N
P80860	BSU31350	pgi	Glucose-6-phosphate isomerase (GPI) (EC 5.3.1.9) (Phosphoglucose isomerase) (PGI) (Phosphohexose isomerase) (PHI) (Vegetative protein 54) (VEG54)	0.1			262	0.99998	52.274	N
P13242	BSU37150	pyrG	CTP synthase (EC 6.3.4.2) (Cytidine 5'-triphosphate synthase) (Cytidine triphosphate synthetase) (CTP synthetase) (CTPS) (UTP--ammonia ligase)	0.2			286	0.99998	73.834	N
O31700	BSU14250	cse15	Sporulation protein cse15	0.6			313	0.999979	78.616	N
P21880	BSU14610	pdhD	Dihydrolipoyl dehydrogenase (EC 1.8.1.4) (Dihydrolipoamide dehydrogenase) (E3 component of pyruvate complex) (S complex, 50 kDa subunit)	0.1			306	0.999979	139.69	N
P33166	BSU01130	tuf	Elongation factor Tu (EF-Tu) (P-40)	0.1			253	0.999979	234.63	N
P54423	BSU10770	wprA	Cell wall-associated protease (EC 3.4.21.-) [Cleaved into: Cell wall-associated polypeptide CWBP23 (CWBP23); Cell wall-associated polypeptide CWBP52 (CWBP52)]	0.2			739	0.999979	52.071	N
P21879	BSU00090	guaB	Inosine-5'-monophosphate dehydrogenase (IMP dehydrogenase) (IMPD) (IMPDH) (EC 1.1.1.205) (Superoxide-inducible protein 12) (SOI12)	0.1			275	0.999978	81.329	N
O34394	BSU12230	yjjA	Uncharacterized protein YjjA	0.3			188	0.999978	47.047	N
O34328	BSU15680	gmk	Guanylate kinase (EC 2.7.4.8) (GMP kinase)	0.2			69	0.999977	57.267	N
Q45477	BSU15430	ileS	Isoleucine--tRNA ligase (EC 6.1.1.5) (Isoleucyl-tRNA synthetase) (IleRS)	0.1			185	0.999977	71.974	N
P05649	BSU00020	dnaN	Beta sliding clamp (Beta clamp) (Sliding clamp) (Beta-clamp processivity factor) (DNA polymerase III beta sliding clamp subunit) (DNA polymerase III subunit beta)	0.2			248	0.999976	51.487	N
O05265	BSU31170	iolU	scyllo-inositol 2-dehydrogenase (NADP(+)) IolU (EC 1.1.1.371) (NADP(+)-dependent scyllo-inositol dehydrogenase 2) (NADP(+)-dependent SI dehydrogenase 2)	0.3			293	0.999976	48.823	N
P09339	BSU18000	citB	Aconitate/2-methylaconitate hydratase (EC 4.2.1.-) (EC 4.2.1.3) (Aconitate hydratase A) (ACN) (Aconitase) (Iron-responsive protein-like) (IRP-like) (RNA-binding protein)	0.1			548	0.999975	46.408	N
O06491	BSU06680	gatA	Glutamyl-tRNA(Gln) amidotransferase subunit A (Glu-ADT subunit A) (EC 6.3.5.7)	0.1			135	0.999975	50.608	N
P39148	BSU36900	glyA	Serine hydroxymethyltransferase (SHMT) (Serine methylase) (EC 2.1.2.1)	0.1			49	0.999975	91.114	N
P54542	BSU23910	yqjE	Uncharacterized protein YqjE	0.2			170	0.999975	50.897	N
P08874	BSU00370	abrB	Transition state regulatory protein AbrB	0.1			53	0.999974	125.12	N
P37476	BSU00690	ftsH	ATP-dependent zinc metalloprotease FtsH (EC 3.4.24.-) (Cell division protease FtsH)	0.1			346	0.999973	47.556	N
O06491	BSU06680	gatA	Glutamyl-tRNA(Gln) amidotransferase subunit A (Glu-ADT subunit A) (EC 6.3.5.7)	0.1			335	0.999972	81.017	N
P28598	BSU06030	groL	60 kDa chaperonin (GroEL protein) (Protein Cpn60) (Stress protein H5)	0.1			81	0.999972	48.229	N
P45694	BSU17890	tkt	Transketolase (TK) (EC 2.2.1.1)	0.1			487	0.999972	65.454	N
Q9KWU4	BSU14860	pyc	Pyruvate carboxylase (EC 6.4.1.1) (Pyruvic carboxylase) (PYC)	0.1			460	0.999971	52.451	N
P21464	BSU16490	rpsB	30S ribosomal protein S2 (BS1) (Vegetative protein 209) (VEG209)	0.1			190	0.999971	137.88	N
P37474	BSU00550	mfd	Transcription-repair-coupling factor (TRCF) (EC 3.6.4.-)	0.4			407	0.999969	47.039	N
P37476	BSU00690	ftsH	ATP-dependent zinc metalloprotease FtsH (EC 3.4.24.-) (Cell division protease FtsH)	0.1			375	0.999968	109.42	N
P32727	BSU16600	nusA	Transcription termination/antitermination protein NusA	0.1			263	0.999968	54.683	N
O34872	BSU30690	ytiB	Putative carbonic anhydrase YtiB (EC 4.2.1.1) (Carbonate dehydratase)	0.2			5	0.999968	53.751	N
P37476	BSU00690	ftsH	ATP-dependent zinc metalloprotease FtsH (EC 3.4.24.-) (Cell division protease FtsH)	0.1			617	0.999966	54.023	N
O34633	BSU12280	yjlC	Uncharacterized protein YjlC	0.1			134	0.999966	56.951	N
P39121	BSU39420	deoC	Deoxyribose-phosphate aldolase (DERA) (EC 4.1.2.4) (2-deoxy-D-ribose 5-phosphate aldolase) (Phosphodeoxyriboaldolase) (Deoxyriboaldolase)	0.2			222	0.999965	52.126	N
P05649	BSU00020	dnaN	Beta sliding clamp (Beta clamp) (Sliding clamp) (Beta-clamp processivity factor) (DNA polymerase III beta sliding clamp subunit) (DNA polymerase III subunit beta)	0.2			327	0.999965	73.405	N
P23129	BSU19370	odhA	2-oxoglutarate dehydrogenase E1 component (EC 1.2.4.2) (Alpha-ketoglutarate dehydrogenase)	#N/A			466	0.999964	55.588	N
O34475	BSU07830	yfkO	Putative NAD(P)H nitroreductase YfkO (EC 1.-.-.-)	0.2			13	0.999964	49.5	N
P54547	BSU23850	zwf	Glucose-6-phosphate 1-dehydrogenase (G6PD) (EC 1.1.1.49) (Vegetative protein 11) (VEG11)	0.1			210	0.999961	123.55	N
P37812	BSU36800	atpC	ATP synthase epsilon chain (ATP synthase F1 sector epsilon subunit) (F-ATPase epsilon subunit)	0.1			105	0.999959	79.148	N
P46920	BSU02980	opuAA	Glycine betaine transport ATP-binding protein OpuAA (EC 7.6.2.9) (Quaternary-amine-transporting ATPase)	0.2			99	0.999958	54.658	N
P94428	BSU03910	gabD	Succinate-semialdehyde dehydrogenase [NADP(+)] (SSDH) (EC 1.2.1.79)	0.3			195	0.999957	52.095	N
P54381	BSU25260	glyS	Glycine--tRNA ligase beta subunit (EC 6.1.1.14) (Glycyl-tRNA synthetase beta subunit) (GlyRS)	0.2			21	0.999957	55.261	N
O34385	BSU30770	mntA	Manganese-binding lipoprotein MntA	0.4			297	0.999956	99.139	N
Q07833	BSU39230	wapA	tRNA nuclease WapA (EC 3.1.-.-) (Cell wall-associated polypeptide CWBP200) (CWBP200) (RNase WapA) (Toxin WapA) (Wall-associated protein)	0.1			1923	0.999956	110.54	N
P36430	BSU30320	leuS	Leucine--tRNA ligase (EC 6.1.1.4) (Leucyl-tRNA synthetase) (LeuRS)	0.2			586	0.999955	93.269	N
P08066	BSU28430	sdhB	Succinate dehydrogenase iron-sulfur subunit (EC 1.3.5.1)	0.1			187	0.999954	53.6	N
P13243	BSU37120	fbaA	Probable fructose-bisphosphate aldolase (FBP aldolase) (FBPA) (EC 4.1.2.13) (Fructose-1,6-bisphosphate aldolase)	0.1			233	0.999953	159.44	N
P24327	BSU09950	prsA	Foldase protein PrsA (EC 5.2.1.8)	0.1			290	0.999952	76.161	N
P20429	BSU01430	rpoA	DNA-directed RNA polymerase subunit alpha (RNAP subunit alpha) (EC 2.7.7.6) (RNA polymerase subunit alpha) (Transcriptase subunit alpha)	0.1			190	0.999951	165.62	N
P42971	BSU04140	pbpC	Penicillin-binding protein 3 (PBP 3) (EC 3.4.16.4) (PSPB20) (Penicillin-binding protein C)	0.1			297	0.999949	48.489	N
P37871	BSU01080	rpoC	DNA-directed RNA polymerase subunit beta' (RNAP subunit beta') (EC 2.7.7.6) (RNA polymerase subunit beta') (Transcriptase subunit beta')	0.1			11	0.999949	90.316	N
P19946	BSU01350	rplO	50S ribosomal protein L15	0.1			68	0.999947	89.752	N
Q05852	BSU35670	gtaB	UTP--glucose-1-phosphate uridylyltransferase (EC 2.7.7.9) (Alpha-D-glucosyl-1-phosphate uridylyltransferase) (General stress protein 33) (GSP33) (UDP-glucose pyrophosphorylase) (UDPGP) (Uridine diphosphoglucose pyrophosphorylase)	0.1			288	0.999946	42.647	N
Q45493	BSU14530	rnjA	Ribonuclease J1 (RNase J1) (EC 3.1.-.-)	0.2			412	0.999946	99.372	N
P21466	BSU29660	rpsD	30S ribosomal protein S4 (BS4)	0.1			158	0.999944	144.4	N
P80886	BSU16090	sucC	Succinate--CoA ligase [ADP-forming] subunit beta (EC 6.2.1.5) (Succinyl-CoA synthetase subunit beta) (SCS-beta)	0.1			199	0.999941	60.352	N
P51777	BSU21930	cspD	Cold shock protein CspD	0.1			62	0.999935	76.1	N
P09122	BSU00190	dnaX	DNA polymerase III subunit gamma/tau (EC 2.7.7.7)	0.5			334	0.99993	58.672	N
Q45477	BSU15430	ileS	Isoleucine--tRNA ligase (EC 6.1.1.5) (Isoleucyl-tRNA synthetase) (IleRS)	0.1			22	0.999927	75.229	N
P17820	BSU25470	dnaK	Chaperone protein DnaK (HSP70) (Heat shock 70 kDa protein) (Heat shock protein 70)	0.1			605	0.999925	129.46	N
P80885	BSU29180	pyk	Pyruvate kinase (PK) (EC 2.7.1.40) (Vegetative protein 17) (VEG17)	0.1			404	0.999925	47.942	N
P42962	BSU04040	ycsE	5-amino-6-(5-phospho-D-ribitylamino)uracil phosphatase YcsE (EC 3.1.3.104)	#N/A			155	0.999925	135.64	N
P37871	BSU01080	rpoC	DNA-directed RNA polymerase subunit beta' (RNAP subunit beta') (EC 2.7.7.6) (RNA polymerase subunit beta') (Transcriptase subunit beta')	0.1			447	0.999924	94.263	N
P20429	BSU01430	rpoA	DNA-directed RNA polymerase subunit alpha (RNAP subunit alpha) (EC 2.7.7.6) (RNA polymerase subunit alpha) (Transcriptase subunit alpha)	0.1			279	0.999919	97.058	N
P80866	BSU32710	sufC	Vegetative protein 296 (VEG296)	0.1			156	0.999916	95.264	N
P36949	BSU35960	rbsB	Ribose import binding protein RbsB	0.2			31	0.999915	53.185	N
P17820	BSU25470	dnaK	Chaperone protein DnaK (HSP70) (Heat shock 70 kDa protein) (Heat shock protein 70)	0.1			455	0.999913	147.56	N
P39795	BSU07810	treA	Trehalose-6-phosphate hydrolase (EC 3.2.1.93) (Alpha,alpha-phosphotrehalase) (Phospho-alpha-(1-1)-glucosidase)	0.3			268	0.999911	56.122	N
P12047	BSU06440	purB	Adenylosuccinate lyase (ASL) (EC 4.3.2.2) (Adenylosuccinase) (ASase) (Glutamyl--tRNA ligase regulatory factor)	0.1			57	0.999908	41.54	N
O34847	BSU29200	accA	Acetyl-coenzyme A carboxylase carboxyl transferase subunit alpha (ACCase subunit alpha) (Acetyl-CoA carboxylase carboxyltransferase subunit alpha) (EC 2.1.3.15)	0.2			325	0.999904	41.164	N
P08065	BSU28440	sdhA	Succinate dehydrogenase flavoprotein subunit (EC 1.3.5.1)	0.1			490	0.999898	98.009	N
O31571	BSU08480	yfhC	Putative NAD(P)H nitroreductase YfhC (EC 1.-.-.-)	0.1			112	0.999898	91.441	N
O07607	BSU10240	yhfI	Probable metallo-hydrolase YhfI (EC 3.-.-.-)	0.3			177	0.999895	101.3	N
Q04797	BSU16750	asd	Aspartate-semialdehyde dehydrogenase (ASA dehydrogenase) (ASADH) (EC 1.2.1.11) (Aspartate-beta-semialdehyde dehydrogenase)	0.1			164	0.999893	52.172	N
P12425	BSU17460	glnA	Glutamine synthetase (GS) (EC 6.3.1.2) (Glutamate--ammonia ligase) (Glutamine synthetase I alpha) (GSI alpha)	0.1			290	0.999889	118.47	N
P39610	BSU38020	pdxK	Pyridoxine kinase (EC 2.7.1.35) (PN/PL/PM kinase) (Pyridoxal kinase) (Pyridoxamine kinase) (Vitamin B6 kinase)	0.2			116	0.999887	46.926	N
O32210	BSU33400	yvgN	Glyoxal reductase (GR) (EC 1.1.1.-) (Methylglyoxal reductase) (EC 1.1.1.283)	0.1			29	0.999887	88.021	N
P37869	BSU33900	eno	Enolase (EC 4.2.1.11) (2-phospho-D-glycerate hydro-lyase) (2-phosphoglycerate dehydratase)	0.1			138	0.999886	81.356	N
P70965	BSU36760	murAA	UDP-N-acetylglucosamine 1-carboxyvinyltransferase 1 (EC 2.5.1.7) (Enoylpyruvate transferase 1) (UDP-N-acetylglucosamine enolpyruvyl transferase 1) (EPT 1)	0.3			435	0.999886	52.19	N
P46208	BSU39820	htpG	Chaperone protein HtpG (Heat shock protein HtpG) (High temperature protein G)	0.2			280	0.999884	44.587	N
P17889	BSU16630	infB	Translation initiation factor IF-2	0.1			518	0.999881	59.67	N
P70965	BSU36760	murAA	UDP-N-acetylglucosamine 1-carboxyvinyltransferase 1 (EC 2.5.1.7) (Enoylpyruvate transferase 1) (UDP-N-acetylglucosamine enolpyruvyl transferase 1) (EPT 1)	0.3			170	0.999879	40.799	N
P37870	BSU01070	rpoB	DNA-directed RNA polymerase subunit beta (RNAP subunit beta) (EC 2.7.7.6) (RNA polymerase subunit beta) (Transcriptase subunit beta)	0.1			571	0.999876	58.427	N
P08066	BSU28430	sdhB	Succinate dehydrogenase iron-sulfur subunit (EC 1.3.5.1)	0.1			240	0.999874	77.282	N
O31567	BSU08440	yfiY	Probable siderophore-binding lipoprotein YfiY	0.1			49	0.999868	53.6	N
P37870	BSU01070	rpoB	DNA-directed RNA polymerase subunit beta (RNAP subunit beta) (EC 2.7.7.6) (RNA polymerase subunit beta) (Transcriptase subunit beta)	0.1			228	0.999866	124.16	N
P14192	BSU00500	glmU	Bifunctional protein GlmU [Includes: UDP-N-acetylglucosamine pyrophosphorylase (EC 2.7.7.23) (N-acetylglucosamine-1-phosphate uridyltransferase); Glucosamine-1-phosphate N-acetyltransferase (EC 2.3.1.157)]	0.2			386	0.999864	87.792	N
P42921	BSU01170	rplD	50S ribosomal protein L4	0.1			188	0.999864	126.02	N
P54390	BSU22580	ypiB	UPF0302 protein YpiB	0.4			129	0.999857	47.045	N
P07343	BSU33040	fumC	Fumarate hydratase class II (Fumarase C) (EC 4.2.1.2) (Aerobic fumarase) (Iron-independent fumarase)	0.1			121	0.999854	121.45	N
P21470	BSU01500	rpsI	30S ribosomal protein S9 (BS10)	0.1			66	0.999851	158.15	N
P80861	BSU12290	yjlD	NADH dehydrogenase-like protein YjlD (EC 1.6.99.-) (Glucose starvation-inducible protein 5) (GSI5)	0.1			272	0.999851	67.33	N
P31847	BSU23370	ypuA	Uncharacterized protein YpuA (ORFX19)	0.3			52	0.999851	99.219	N
P37887	BSU00730	cysK	Cysteine synthase (CSase) (EC 2.5.1.47) (O-acetylserine (thiol)-lyase) (OAS-TL) (Superoxide-inducible protein 11) (SOI11)	0.1			14	0.999844	46.156	N
P08066	BSU28430	sdhB	Succinate dehydrogenase iron-sulfur subunit (EC 1.3.5.1)	0.1			195	0.99984	43.897	N
O34828	BSU27380	yrzB	UPF0473 protein YrzB	0.1			28	0.999839	55.986	N
P96614	BSU04580	cshA	DEAD-box ATP-dependent RNA helicase CshA (EC 3.6.4.13)	0.1			40	0.999835	90.729	N
P37809	BSU36810	atpD	ATP synthase subunit beta (EC 7.1.2.2) (ATP synthase F1 sector subunit beta) (F-ATPase subunit beta) (Vegetative protein 31) (VEG31)	0.1			106	0.999831	144.74	N
O05239	BSU31370	yugJ	Probable NADH-dependent butanol dehydrogenase 1 (EC 1.1.1.-)	0.2			233	0.999826	55.261	N
Q04795	BSU16760	dapG	Aspartokinase 1 (EC 2.7.2.4) (Aspartate kinase 1) (Aspartokinase I)	0.2			132	0.999824	47.499	N
P54466	BSU25380	yqfA	UPF0365 protein YqfA	0.1			93	0.999823	45.081	N
P37464	BSU00130	serS	Serine--tRNA ligase (EC 6.1.1.11) (Seryl-tRNA synthetase) (SerRS) (Seryl-tRNA(Ser/Sec) synthetase)	0.2			355	0.999821	67.964	N
P42412	BSU39760	iolA	Malonate-semialdehyde dehydrogenase (MSA dehydrogenase) (EC 1.2.1.-) (Methylmalonate-semialdehyde dehydrogenase) (MMSA dehydrogenase) (MMSDH) (MSDH) (EC 1.2.1.27)	0.4			271	0.999819	81.532	N
P20429	BSU01430	rpoA	DNA-directed RNA polymerase subunit alpha (RNAP subunit alpha) (EC 2.7.7.6) (RNA polymerase subunit alpha) (Transcriptase subunit alpha)	0.1			272	0.999819	113.49	N
P46354	BSU23490	punA	Purine nucleoside phosphorylase 1 (PNP 1) (EC 2.4.2.1) (Inosine phosphorylase) (Inosine-guanosine phosphorylase) (Purine nucleoside phosphorylase I) (PNP I) (Pu-NPase I)	0.1			174	0.999816	49.097	N
P46354	BSU23490	punA	Purine nucleoside phosphorylase 1 (PNP 1) (EC 2.4.2.1) (Inosine phosphorylase) (Inosine-guanosine phosphorylase) (Purine nucleoside phosphorylase I) (PNP I) (Pu-NPase I)	0.1			233	0.999814	65.301	N
P37870	BSU01070	rpoB	DNA-directed RNA polymerase subunit beta (RNAP subunit beta) (EC 2.7.7.6) (RNA polymerase subunit beta) (Transcriptase subunit beta)	0.1			524	0.999791	75.797	N
P30950	BSU28130	hemB	Delta-aminolevulinic acid dehydratase (ALAD) (ALADH) (EC 4.2.1.24) (Porphobilinogen synthase)	0.2			272	0.999788	43.162	N
[truncated: 3,745 more rows]

## Sheet: 3 PAO1 Dyn HA-yne mod.
Uniprot entry	Gene name (ordered locus )	Gene name	Protein name	Protein abundance (within top x%)	pAsp	Ann. site	Mod. site	Amino acid	ID type 1 min C Dyn	ID type 1 min M Dyn	ID type 5 min C Dyn	ID type 5 min M Dyn	ID type 15 min C Dyn	ID type 15 min M Dyn	ID type 1 min C DMSO	ID type 1 min M DMSO	ID type 5 min C DMSO	ID type 5 min M DMSO	ID type 15 min C DMSO	ID type 15 min M DMSO
[truncated: 6,033 more rows]

[truncated: 2 more sheets: 4 PAO1 isoDTB quant. 1 min Dyn, 5 PAO1 isoDTB quant. 30 min Dyn]
