# Supplementary material for: A tailored phosphoaspartate probe unravels CprR as a response regulator in Pseudomonas aeruginosa interkingdom signaling
Source: Royal Society of Chemistry journal article supplement (doi:10.1039/d0sc06226j), 2021-01-01
Supplement: d0sc06226j3.xlsx [file d0sc06226j3.xlsx]

## Sheet: Table of content
Supplementary_Table_S2
Worksheet	Information
1 Isolation list	Precursor isolation list of selected light and heavy peptide precursors for PRM measurements of the isoDTB samples. Precursors were selected by MS1 Filtering with Skyline. Additionally five PROCAL peptides were included for retention time control.
2 Transition list	Transition list of the six most intense transitions (top6 precursor-fragment ion pairs) from the PRM measurements of the isoDTB samples searched with MaxQuant, which were selected and ranked using a library generated with Skyline .
3 PROCAL Peptides	List of spiked in PROCAL Peptides and average measured retention times determined by MS1 Filtering in Skyline.
4 PRM results (1 min Dyn)	Quantitative results of the PRM measurements for 1 min Dyn (light isoDTB tag) and DMSO (heavy isoDTB tag) treatment exported from Skyline.
5 PRM results (30 min Dyn)	Quantitative results of the PRM measurements for 30 min Dyn (light isoDTB tag) and DMSO (heavy isoDTB tag) treatment exported from Skyline.
Column header	Information
Gene name	Identifiers of genes the peptide is associated with.
Precursor mass [m/z]	Precursor mass of the best transition(s) determined with Skyline by MS1 Filtering for the respective isoDTB quantitative experiment. For further information see Supplemental_Information.docx.
Charge state [z]	Charge state of the corresponding precursor ion.
Polarity	Polarity of the corresponding precursor ion.
NCE [%]	Normalized collision energy.
Isotope label type	Indication of the respective condition. Dynorphin treated samples were attached to the light isoDTB tag and non-treated samples to the heavy isoDTB tag.
Peptide modified sequence	Sequence and modifications of the analyzed peptide. [+576.3]/[+582.4] indicates the HA-yne modified site with the probe and the light/heavy isoDTB tag and [+57.0] indicates the fixed carbamidomethyl (C) modification.
Fragment mass [mz]	Fragment mass of the six most intense fragment ions (top6), which were selected and ranked using a library generated with Skyline from the PRM measurements of the isoDTB samples searched with MaxQuant.
Fragment ion	Fragment ions were selected using a library generated with Skyline from the PRM measurements of the isoDTB samples searched with MaxQuant.
Fragment ion rank	Fragment ions were ranked (top6) using a library generated with Skyline from the PRM measurements of the isoDTB samples searched with MaxQuant. C indicates the soluble fraction, M the insoluble fraction.
Average measured retention time [min]	Averaged retention time of the respective extracted ion chromatogramm in Skyline.
Dot product L/H	Correlation of the fragment ion intensities between the detected light and heavy peptides from PRM measurements. Transitions with a dot product (L/H) of > 0.9 were included for the final Ratio (L/H) calculation.
Library dot product	Correlation of the fragment ion intensities between the detected peptides measured by PRM and the experimental library spectrum from Skyline. Transitions with a library dot product of > 0.85 were included for the final Ratio (L/H) calculation.
Predicted retention time [min]	Predicted retention time calculated with the retention time predictor in Skyline using the indexed retention time calculator calibration.
Best retention time [min]	Retention time of the best peak of the respective extracted ion chromatogramm in Skyline.
Average mass error [ppm]	Weighted averaged mass error of a precursor ion in comparison to the respective predicted monoisotopic mass of the identified peptide sequence determined by Skyline.
Total area fragment	Sum of the 6 most intense fragmention ion peak areas used for protein quantification with Skyline.
Ratio (L/H)	Ratio between peptides bearing the light and heavy isoDTB tag.
Replicate name	Assignment of the respective samples. Roman numerals indicate the biological replicate. C indicates the soluble fraction, M the insoluble fraction.

## Sheet: 1 Isolation list
Gene name	Precursor mass [m/z]	Charge state [z]	Polarity	NCE [%]	Isotope label type	Peptide modified sequence
cprR	793.454	3	Positive	27	light	ANRYDVILLD[+576.349615]IMLPR
cprR	795.457	3	Positive	27	heavy	ANRYDVILLD[+582.357104]IMLPR
gacA	654.712	3	Positive	27	light	ELKPDVVLMD[+576.349615]VK
gacA	656.714	3	Positive	27	heavy	ELKPDVVLMD[+582.357104]VK
parR	1017.29	4	Positive	27	light	GDAAFAAFLD[+576.349615]FKPQVVVLDLMLPGQNGLQVC[+57.021464]R
parR	1018.8	4	Positive	27	heavy	GDAAFAAFLD[+582.357104]FKPQVVVLDLMLPGQNGLQVC[+57.021464]R
phoP	824.945	4	Positive	27	light	VSEYHHDLAVID[+576.349615]LGLPGMSGLDLIR
phoP	826.447	4	Positive	27	heavy	VSEYHHDLAVID[+582.357104]LGLPGMSGLDLIR
PROCAL peptides	708.302	2	Positive	27	light	YSAHEEHHYDK
PROCAL peptides	589.272	2	Positive	27	light	LSSGYDGTSYK
PROCAL peptides	607.301	2	Positive	27	light	TLIAYDDSSTK
PROCAL peptides	669.324	2	Positive	27	light	GDFTFFIDTFK
PROCAL peptides	637.41	2	Positive	27	light	IDVYILALLLK

## Sheet: 2 Transition list
Gene name	Peptide modified sequence	Isotope label type	Precursor [mz]	Fragment [mz]	Fragment ion	Fragment ion rank (I C)	Fragment ion rank (I M)	Fragment ion rank (II C)	Fragment ion rank (II M)	Fragment ion rank (III C)	Fragment ion rank (IV C)	Fragment ion rank (III M)	Fragment ion rank (IV M)
cprR	ANRYDVILLD[+576.3]IMLPR	light	793.454	385.256	y3	2	2	2	2	2	2	0	2
cprR	ANRYDVILLD[+576.3]IMLPR	light	793.454	516.296	y4	1	1	1	1	1	1	0	1
cprR	ANRYDVILLD[+576.3]IMLPR	light	793.454	629.38	y5	5	5	5	5	4	5	0	4
cprR	ANRYDVILLD[+576.3]IMLPR	light	793.454	832.431	b7	3	3	3	3	5	3	0	3
cprR	ANRYDVILLD[+576.3]IMLPR	light	793.454	945.515	b8	4	4	4	4	3	4	0	5
cprR	ANRYDVILLD[+576.3]IMLPR	light	793.454	1058.6	b9	6	6	6	6	6	6	0	0
cprR	ANRYDVILLD[+582.4]IMLPR	heavy	795.457	385.256	y3	1	1	1	1	1	0	0	0
cprR	ANRYDVILLD[+582.4]IMLPR	heavy	795.457	516.296	y4	2	2	2	2	0	0	0	0
cprR	ANRYDVILLD[+582.4]IMLPR	heavy	795.457	629.38	y5	5	6	5	6	0	0	1	0
cprR	ANRYDVILLD[+582.4]IMLPR	heavy	795.457	832.431	b7	3	3	3	3	0	0	0	0
cprR	ANRYDVILLD[+582.4]IMLPR	heavy	795.457	945.515	b8	6	5	4	5	0	0	0	0
cprR	ANRYDVILLD[+582.4]IMLPR	heavy	795.457	1058.6	b9	4	4	6	4	0	0	0	0
gacA	ELKPDVVLMD[+576.3]VK	light	654.712	147.113	y1	2	2	2	2	2	1	1	2
gacA	ELKPDVVLMD[+576.3]VK	light	654.712	246.181	y2	1	1	1	1	1	2	2	1
gacA	ELKPDVVLMD[+576.3]VK	light	654.712	781.445	b7	6	5	6	6	6	6	6	6
gacA	ELKPDVVLMD[+576.3]VK	light	654.712	937.558	y3	4	3	4	4	4	4	5	4
gacA	ELKPDVVLMD[+576.3]VK	light	654.712	1068.6	y4	3	4	3	3	3	3	4	3
gacA	ELKPDVVLMD[+576.3]VK	light	654.712	1181.68	y5	5	6	5	5	5	5	3	5
gacA	ELKPDVVLMD[+582.4]VK	heavy	656.714	147.113	y1	2	2	2	1	1	1	1	1
gacA	ELKPDVVLMD[+582.4]VK	heavy	656.714	246.181	y2	1	1	1	2	2	2	2	2
gacA	ELKPDVVLMD[+582.4]VK	heavy	656.714	781.445	b7	6	5	6	5	5	6	6	5
gacA	ELKPDVVLMD[+582.4]VK	heavy	656.714	943.565	y3	4	4	4	4	4	4	5	3
gacA	ELKPDVVLMD[+582.4]VK	heavy	656.714	1074.61	y4	3	3	3	3	3	3	3	4
gacA	ELKPDVVLMD[+582.4]VK	heavy	656.714	1187.69	y5	5	6	5	6	6	5	4	6
parR	GDAAFAAFLD[+576.3]FKPQVVVLDLMLPGQNGLQVC[+57.0]R	light	1017.29	315.13	b4	4	6	5	4	0	0	0	0
parR	GDAAFAAFLDFKPQVVVLD[+576.3]LMLPGQNGLQVC[+57.0]R	light	1017.29	315.13	b4	4	4	4	4	0	0	0	0
parR	GDAAFAAFLDFKPQVVVLD[+576.3]LMLPGQNGLQVC[+57.0]R	light	1017.29	462.198	b5	5	6	6	5	0	0	0	0
parR	GDAAFAAFLD[+576.3]FKPQVVVLDLMLPGQNGLQVC[+57.0]R	light	1017.29	564.783	y10	2	2	2	2	0	0	0	0
parR	GDAAFAAFLDFKPQVVVLD[+576.3]LMLPGQNGLQVC[+57.0]R	light	1017.29	564.783	y10	2	2	2	2	0	0	0	0
parR	GDAAFAAFLD[+576.3]FKPQVVVLDLMLPGQNGLQVC[+57.0]R	light	1017.29	846.425	y7	6	4	6	5	0	2	0	0
parR	GDAAFAAFLDFKPQVVVLD[+576.3]LMLPGQNGLQVC[+57.0]R	light	1017.29	1031.51	y9	6	5	5	6	0	0	0	0
parR	GDAAFAAFLD[+576.3]FKPQVVVLDLMLPGQNGLQVC[+57.0]R	light	1017.29	1128.56	y10	1	1	1	1	0	1	1	0
parR	GDAAFAAFLDFKPQVVVLD[+576.3]LMLPGQNGLQVC[+57.0]R	light	1017.29	1128.56	y10	1	1	1	1	1	1	1	0
parR	GDAAFAAFLD[+576.3]FKPQVVVLDLMLPGQNGLQVC[+57.0]R	light	1017.29	1241.64	y11	3	3	3	3	0	0	0	0
parR	GDAAFAAFLDFKPQVVVLD[+576.3]LMLPGQNGLQVC[+57.0]R	light	1017.29	1241.64	y11	3	3	3	3	0	0	0	0
parR	GDAAFAAFLD[+576.3]FKPQVVVLDLMLPGQNGLQVC[+57.0]R	light	1017.29	1372.68	y12	5	5	4	6	0	0	0	0
parR	GDAAFAAFLD[+582.4]FKPQVVVLDLMLPGQNGLQVC[+57.0]R	heavy	1018.8	315.13	b4	3	3	4	2	0	0	0	0
parR	GDAAFAAFLDFKPQVVVLD[+582.4]LMLPGQNGLQVC[+57.0]R	heavy	1018.8	315.13	b4	3	3	4	2	0	0	0	0
parR	GDAAFAAFLDFKPQVVVLD[+582.4]LMLPGQNGLQVC[+57.0]R	heavy	1018.8	462.198	b5	6	5	5	6	0	0	0	0
parR	GDAAFAAFLD[+582.4]FKPQVVVLDLMLPGQNGLQVC[+57.0]R	heavy	1018.8	564.783	y10	2	4	2	5	0	0	0	0
parR	GDAAFAAFLDFKPQVVVLD[+582.4]LMLPGQNGLQVC[+57.0]R	heavy	1018.8	564.783	y10	2	4	2	5	0	0	0	0
parR	GDAAFAAFLD[+582.4]FKPQVVVLDLMLPGQNGLQVC[+57.0]R	heavy	1018.8	846.425	y7	6	5	5	3	0	1	0	0
parR	GDAAFAAFLDFKPQVVVLD[+582.4]LMLPGQNGLQVC[+57.0]R	heavy	1018.8	1031.51	y9	5	6	6	4	0	0	0	0
parR	GDAAFAAFLD[+582.4]FKPQVVVLDLMLPGQNGLQVC[+57.0]R	heavy	1018.8	1128.56	y10	1	1	1	1	0	0	0	0
parR	GDAAFAAFLDFKPQVVVLD[+582.4]LMLPGQNGLQVC[+57.0]R	heavy	1018.8	1128.56	y10	1	1	1	1	0	0	0	0
parR	GDAAFAAFLD[+582.4]FKPQVVVLDLMLPGQNGLQVC[+57.0]R	heavy	1018.8	1241.64	y11	4	2	3	4	0	0	0	0
parR	GDAAFAAFLDFKPQVVVLD[+582.4]LMLPGQNGLQVC[+57.0]R	heavy	1018.8	1241.64	y11	4	2	3	3	0	0	0	0
parR	GDAAFAAFLD[+582.4]FKPQVVVLDLMLPGQNGLQVC[+57.0]R	heavy	1018.8	1372.68	y12	5	6	6	6	0	0	0	0
phoP	VSEYHHDLAVID[+576.3]LGLPGMSGLDLIR	light	824.945	529.787	y10	2	2	2	2	2	2	2	2
phoP	VSEYHHDLAVID[+576.3]LGLPGMSGLDLIR	light	824.945	686.42	y6	5	5	5	5	5	5	6	6
phoP	VSEYHHDLAVID[+576.3]LGLPGMSGLDLIR	light	824.945	773.452	y7	3	3	3	3	4	3	3	3
phoP	VSEYHHDLAVID[+576.3]LGLPGMSGLDLIR	light	824.945	961.514	y9	4	4	4	4	3	4	4	4
phoP	VSEYHHDLAVID[+576.3]LGLPGMSGLDLIR	light	824.945	1058.57	y10	1	1	1	1	1	1	1	1
phoP	VSEYHHDLAVID[+576.3]LGLPGMSGLDLIR	light	824.945	1151.55	b10	6	6	6	6	6	6	5	5
phoP	VSEYHHDLAVID[+582.4]LGLPGMSGLDLIR	heavy	826.447	529.787	y10	2	2	2	2	2	2	2	2
phoP	VSEYHHDLAVID[+582.4]LGLPGMSGLDLIR	heavy	826.447	686.42	y6	5	5	5	5	5	5	5	5
phoP	VSEYHHDLAVID[+582.4]LGLPGMSGLDLIR	heavy	826.447	773.452	y7	3	3	3	3	3	3	3	3
phoP	VSEYHHDLAVID[+582.4]LGLPGMSGLDLIR	heavy	826.447	961.514	y9	4	4	4	4	4	4	4	4
phoP	VSEYHHDLAVID[+582.4]LGLPGMSGLDLIR	heavy	826.447	1058.57	y10	1	1	1	1	1	1	1	1
phoP	VSEYHHDLAVID[+582.4]LGLPGMSGLDLIR	heavy	826.447	1151.55	b10	6	6	6	6	6	6	6	6
PROCAL peptides	YSAHEEHHYDK	light	708.302	262.14	y2	2	2	2	2	2	2	3	3
PROCAL peptides	GDFTFFIDTFK	light	669.324	395.229	y3	3	3	3	3	6	4	4	4
PROCAL peptides	YSAHEEHHYDK	light	708.302	425.203	y3	3	3	3	3	3	3	2	2
PROCAL peptides	GDFTFFIDTFK	light	669.324	510.256	y4	4	4	4	4	3	3	3	3
PROCAL peptides	YSAHEEHHYDK	light	708.302	547.736	y8	1	1	1	1	1	1	1	1
PROCAL peptides	LSSGYDGTSYK	light	589.272	555.277	y5	3	4	4	4	4	4	4	3
PROCAL peptides	YSAHEEHHYDK	light	708.302	562.262	y4	6	6	5	6	5	5	6	5
PROCAL peptides	GDFTFFIDTFK	light	669.324	623.34	y5	5	5	5	5	4	6	5	5
PROCAL peptides	YSAHEEHHYDK	light	708.302	635.25	b10	5	5	6	5	6	6	5	6
PROCAL peptides	LSSGYDGTSYK	light	589.272	670.304	y6	4	2	3	3	2	3	2	4
PROCAL peptides	YSAHEEHHYDK	light	708.302	699.321	y5	4	4	4	4	4	4	4	4
PROCAL peptides	GDFTFFIDTFK	light	669.324	770.408	y6	1	1	1	1	1	1	1	1
PROCAL peptides	LSSGYDGTSYK	light	589.272	833.368	y7	6	6	6	6	6	6	6	6
PROCAL peptides	LSSGYDGTSYK	light	589.272	890.389	y8	5	5	5	5	5	5	5	5
PROCAL peptides	GDFTFFIDTFK	light	669.324	917.477	y7	2	2	2	2	2	2	2	2
PROCAL peptides	LSSGYDGTSYK	light	589.272	977.421	y9	1	1	1	1	1	1	1	1
PROCAL peptides	GDFTFFIDTFK	light	669.324	1018.52	y8	6	6	6	6	5	5	6	6
PROCAL peptides	LSSGYDGTSYK	light	589.272	1064.45	y10	2	3	2	2	3	2	3	2

## Sheet: 3 PROCAL Peptides
Peptide modified sequence	Precursor [mz]	Charge state [z]	Average measured retention time [min]
YSAHEEHHYDK	708.302	2	13.63
HEHISSDYAGK	622.289	2	14.74
TFAHTESHISK	629.315	2	15.23
ISLGEHEGGGK	542.275	2	16.34
FGTGTYAGGEK	544.256	2	18.9
TASGVGGFSTK	506.259	2	19.27
LSSGYDGTSYK	589.272	2	19.87
VGASTGYSGLK	520.275	2	20.34
SYASDFGSSAK	560.251	2	21.92
LYSYYSSTESK	664.306	2	24.67
LYTGAGYDEVK	608.298	2	27.05
TLIAYDDSSTK	607.301	2	27.51
FLASSEGGFTK	572.288	2	29.35
FVGTEYDGLAK	600.301	2	33.64
HLTGLTFDTYK	648.335	2	35.06
YALDSYSLSSK	617.304	2	36.26
GFLDYESTGAK	594.283	2	36.36
HDTVFGSYLYK	665.327	2	38.15
ALFSSITDSEK	599.304	2	38.77
HFALFSTDVTK	633.33	2	40.03
YFGYTSDTFGK	643.29	2	40.34
TFTGTTDSFFK	626.298	2	42.97
VSGFSDISIYK	608.316	2	44.16
TFGTETFDTFK	647.304	2	45.45
ASDLLSGYYIK	615.324	2	46.78
FLFTGYDTSVK	639.324	2	47.47
VYAETLSGFIK	614.335	2	47.98
TSIDSFIDSYK	638.309	2	50.14
GFVIDDGLITK	589.327	2	50.26
GIFGAFTDDYK	617.293	2	52.22
GASDFLSFAVK	571.298	2	54.35
VSSIFFDTFDK	653.322	2	57.04
FFLTGTSIFVK	630.355	2	61.57
GDFTFFIDTFK	669.324	2	70.94
SLFFIIDGFVK	643.363	2	78.32
FLISLLEEYFK	701.387	2	82.94
LFISALVDFFK	650.371	2	84.44
IDVYILALLLK	637.41	2	84.61
SLIFFLSTLLK	641.394	2	87.57
SILAFLYLYFK	689.394	2	88.57

## Sheet: 4 PRM results (1 min Dyn)
Gene name	Peptide modified sequence	Precursor [mz]	Isotope label type	Dot product (L/H)	Library dot product	Predicted retention time [min]	Best retention time [min]	Average mass error [ppm]	Total area fragment	Ratio (L/H)	Replicate name
cprR	ANRYDVILLD[+576.3]IMLPR	793.454	light	0.9602	0.9833	71.5	71.76	-4.9	17943974	20.9495	I C
cprR	ANRYDVILLD[+576.3]IMLPR	793.454	light	0.9562	0.9909	71.5	71.54	-3.7	23017628	17.5485	I M
cprR	ANRYDVILLD[+576.3]IMLPR	793.454	light	0.9107	0.9856	71.5	71.75	-3.6	17180560	25.3845	II C
cprR	ANRYDVILLD[+576.3]IMLPR	793.454	light	0.9566	0.9857	71.5	71.59	-5.4	18026636	18.5469	II M
cprR	ANRYDVILLD[+576.3]IMLPR	793.454	light	0.4277	0.9515	71.5	71.87	-6.6	1538922	123.533	III C
cprR	ANRYDVILLD[+576.3]IMLPR	793.454	light	0	0.9844	71.5	71.92	-2.1	1069404	infinite	III M
cprR	ANRYDVILLD[+576.3]IMLPR	793.454	light	0	0.9753	71.5	71.87	-2.8	1908935	infinite	IV C
cprR	ANRYDVILLD[+576.3]IMLPR	793.454	light	0	0.7772	71.5	71.94	-3.1	190938	infinite	IV M
cprR	ANRYDVILLD[+582.4]IMLPR	795.457	heavy	0.9602	0.8952	71.5	71.76	-5.9	856536	20.9495	I C
cprR	ANRYDVILLD[+582.4]IMLPR	795.457	heavy	0.9562	0.9017	71.5	71.58	-7.3	1311661	17.5485	I M
cprR	ANRYDVILLD[+582.4]IMLPR	795.457	heavy	0.9107	0.855	71.5	71.75	-4.4	676813	25.3845	II C
cprR	ANRYDVILLD[+582.4]IMLPR	795.457	heavy	0.9566	0.8807	71.5	71.59	-10.2	971948	18.5469	II M
cprR	ANRYDVILLD[+582.4]IMLPR	795.457	heavy	0.4277	0.2975	71.5	71.76	-3.5	12458	123.533	III C
cprR	ANRYDVILLD[+582.4]IMLPR	795.457	heavy	0	0	71.5	71.92	#N/A	0	infinite	III M
cprR	ANRYDVILLD[+582.4]IMLPR	795.457	heavy	0	0	71.5	71.87	#N/A	0	infinite	IV C
cprR	ANRYDVILLD[+582.4]IMLPR	795.457	heavy	0	0	71.5	71.94	#N/A	0	infinite	IV M
gacA	ELKPDVVLMD[+576.3]VK	654.712	light	0.9996	0.9834	52.24	52.49	-4.8	52840424	0.6618	I C
gacA	ELKPDVVLMD[+576.3]VK	654.712	light	0.9951	0.972	52.24	52.41	-7.5	10843622	1.3652	I M
gacA	ELKPDVVLMD[+576.3]VK	654.712	light	0.9991	0.9823	52.24	52.45	-5.8	37659668	1.1311	II C
gacA	ELKPDVVLMD[+576.3]VK	654.712	light	0.9968	0.982	52.24	52.37	-2.9	8523741	1.1666	II M
gacA	ELKPDVVLMD[+576.3]VK	654.712	light	0.9907	0.967	52.24	52.49	-4.7	3760215	1.0468	III C
gacA	ELKPDVVLMD[+576.3]VK	654.712	light	0.9969	0.9175	52.24	52.48	-4	363841	0.5617	III M
gacA	ELKPDVVLMD[+576.3]VK	654.712	light	0.999	0.9674	52.24	52.53	-3.5	5381804	1.2749	IV C
gacA	ELKPDVVLMD[+576.3]VK	654.712	light	0.9275	0.8402	52.24	52.53	-1.4	184548	0.4521	IV M
gacA	ELKPDVVLMD[+582.4]VK	656.714	heavy	0.9996	0.982	52.24	52.49	-5	79848064	0.6618	I C
gacA	ELKPDVVLMD[+582.4]VK	656.714	heavy	0.9951	0.9706	52.24	52.37	-4.2	7942697	1.3652	I M
gacA	ELKPDVVLMD[+582.4]VK	656.714	heavy	0.9991	0.9765	52.24	52.45	-6	33294288	1.1311	II C
gacA	ELKPDVVLMD[+582.4]VK	656.714	heavy	0.9968	0.9617	52.24	52.37	-2.4	7306381	1.1666	II M
gacA	ELKPDVVLMD[+582.4]VK	656.714	heavy	0.9907	0.9693	52.24	52.45	-5	3592245	1.0468	III C
gacA	ELKPDVVLMD[+582.4]VK	656.714	heavy	0.9969	0.9376	52.24	52.52	-4.8	647785	0.5617	III M
gacA	ELKPDVVLMD[+582.4]VK	656.714	heavy	0.999	0.9566	52.24	52.53	-2.7	4221472	1.2749	IV C
gacA	ELKPDVVLMD[+582.4]VK	656.714	heavy	0.9275	0.9609	52.24	52.49	-1.7	408158	0.4521	IV M
parR	GDAAFAAFLD[+576.3]FKPQVVVLDLMLPGQNGLQVC[+57.0]R	1017.29	light	0.9941	0.9686	90.43	90.78	-4.1	4279604	2.3404	I C
parR	GDAAFAAFLDFKPQVVVLD[+576.3]LMLPGQNGLQVC[+57.0]R	1017.29	light	0.9968	0.9191	90.46	90.78	-3.9	4123941	2.2261	I C
parR	GDAAFAAFLD[+576.3]FKPQVVVLDLMLPGQNGLQVC[+57.0]R	1017.29	light	0.9877	0.9415	90.43	90.64	-4.2	7807965	2.1902	I M
parR	GDAAFAAFLDFKPQVVVLD[+576.3]LMLPGQNGLQVC[+57.0]R	1017.29	light	0.9871	0.9252	90.46	90.64	-4.4	7443235	2.2008	I M
parR	GDAAFAAFLD[+576.3]FKPQVVVLDLMLPGQNGLQVC[+57.0]R	1017.29	light	0.9944	0.96	90.43	90.8	-5.1	6159651	1.9899	II C
parR	GDAAFAAFLDFKPQVVVLD[+576.3]LMLPGQNGLQVC[+57.0]R	1017.29	light	0.9953	0.9206	90.46	90.8	-5.3	5986564	1.9287	II C
parR	GDAAFAAFLD[+576.3]FKPQVVVLDLMLPGQNGLQVC[+57.0]R	1017.29	light	0.9868	0.9563	90.43	90.68	-3.7	4722218	1.5611	II M
parR	GDAAFAAFLDFKPQVVVLD[+576.3]LMLPGQNGLQVC[+57.0]R	1017.29	light	0.9848	0.9123	90.46	90.68	-3.3	4433846	1.4998	II M
parR	GDAAFAAFLD[+576.3]FKPQVVVLDLMLPGQNGLQVC[+57.0]R	1017.29	light	0	0.5504	90.43	90.96	-0.6	15503	infinite	III C
parR	GDAAFAAFLDFKPQVVVLD[+576.3]LMLPGQNGLQVC[+57.0]R	1017.29	light	0	0.5725	90.46	90.96	-0.6	15503	infinite	III C
parR	GDAAFAAFLD[+576.3]FKPQVVVLDLMLPGQNGLQVC[+57.0]R	1017.29	light	0	0.5504	90.43	90.92	-2	18125	infinite	III M
parR	GDAAFAAFLDFKPQVVVLD[+576.3]LMLPGQNGLQVC[+57.0]R	1017.29	light	0	0.5725	90.46	90.92	-2	18121	infinite	III M
parR	GDAAFAAFLD[+576.3]FKPQVVVLDLMLPGQNGLQVC[+57.0]R	1017.29	light	0	0.5504	90.43	90.93	1.2	26110	infinite	IV C
parR	GDAAFAAFLDFKPQVVVLD[+576.3]LMLPGQNGLQVC[+57.0]R	1017.29	light	0	0.5725	90.46	90.93	1.4	24705	infinite	IV C
parR	GDAAFAAFLD[+576.3]FKPQVVVLDLMLPGQNGLQVC[+57.0]R	1017.29	light	1	0	90.43	90.87	#N/A	0	NaN	IV M
parR	GDAAFAAFLDFKPQVVVLD[+576.3]LMLPGQNGLQVC[+57.0]R	1017.29	light	1	0	90.46	90.27	#N/A	0	NaN	IV M
parR	GDAAFAAFLD[+582.4]FKPQVVVLDLMLPGQNGLQVC[+57.0]R	1018.8	heavy	0.9941	0.8992	90.43	90.78	-5.5	1828600	2.3404	I C
parR	GDAAFAAFLDFKPQVVVLD[+582.4]LMLPGQNGLQVC[+57.0]R	1018.8	heavy	0.9968	0.9166	90.46	90.78	-5.8	1852577	2.2261	I C
parR	GDAAFAAFLD[+582.4]FKPQVVVLDLMLPGQNGLQVC[+57.0]R	1018.8	heavy	0.9877	0.8873	90.43	90.64	-2.6	3565027	2.1902	I M
parR	GDAAFAAFLDFKPQVVVLD[+582.4]LMLPGQNGLQVC[+57.0]R	1018.8	heavy	0.9871	0.8862	90.46	90.64	-2.2	3382028	2.2008	I M
parR	GDAAFAAFLD[+582.4]FKPQVVVLDLMLPGQNGLQVC[+57.0]R	1018.8	heavy	0.9944	0.9439	90.43	90.8	-5.9	3095471	1.9899	II C
parR	GDAAFAAFLDFKPQVVVLD[+582.4]LMLPGQNGLQVC[+57.0]R	1018.8	heavy	0.9953	0.9558	90.46	90.8	-5.7	3103991	1.9287	II C
parR	GDAAFAAFLD[+582.4]FKPQVVVLDLMLPGQNGLQVC[+57.0]R	1018.8	heavy	0.9868	0.8706	90.43	90.72	-1.6	3024860	1.5611	II M
parR	GDAAFAAFLDFKPQVVVLD[+582.4]LMLPGQNGLQVC[+57.0]R	1018.8	heavy	0.9848	0.9251	90.46	90.72	0	2956215	1.4998	II M
parR	GDAAFAAFLD[+582.4]FKPQVVVLDLMLPGQNGLQVC[+57.0]R	1018.8	heavy	0	0	90.43	90.89	#N/A	0	infinite	III C
parR	GDAAFAAFLDFKPQVVVLD[+582.4]LMLPGQNGLQVC[+57.0]R	1018.8	heavy	0	0	90.46	90.89	#N/A	0	infinite	III C
parR	GDAAFAAFLD[+582.4]FKPQVVVLDLMLPGQNGLQVC[+57.0]R	1018.8	heavy	0	0	90.43	90.84	#N/A	0	infinite	III M
parR	GDAAFAAFLDFKPQVVVLD[+582.4]LMLPGQNGLQVC[+57.0]R	1018.8	heavy	0	0	90.46	90.92	#N/A	0	infinite	III M
parR	GDAAFAAFLD[+582.4]FKPQVVVLDLMLPGQNGLQVC[+57.0]R	1018.8	heavy	0	0	90.43	90.94	#N/A	0	infinite	IV C
parR	GDAAFAAFLDFKPQVVVLD[+582.4]LMLPGQNGLQVC[+57.0]R	1018.8	heavy	0	0	90.46	90.96	#N/A	0	infinite	IV C
parR	GDAAFAAFLD[+582.4]FKPQVVVLDLMLPGQNGLQVC[+57.0]R	1018.8	heavy	1	0	90.43	90.87	#N/A	0	NaN	IV M
parR	GDAAFAAFLDFKPQVVVLD[+582.4]LMLPGQNGLQVC[+57.0]R	1018.8	heavy	1	0	90.46	90.27	#N/A	0	NaN	IV M
phoP	VSEYHHDLAVID[+576.3]LGLPGMSGLDLIR	824.945	light	0.9996	0.9899	70.41	70.68	-5.4	124080672	0.5459	I C
phoP	VSEYHHDLAVID[+576.3]LGLPGMSGLDLIR	824.945	light	0.9991	0.9971	70.41	70.44	-5.5	251805184	0.9694	I M
phoP	VSEYHHDLAVID[+576.3]LGLPGMSGLDLIR	824.945	light	0.9985	0.9859	70.41	70.65	-4.6	111696464	0.9859	II C
phoP	VSEYHHDLAVID[+576.3]LGLPGMSGLDLIR	824.945	light	0.9989	0.9939	70.41	70.48	-3.7	196045888	1.0253	II M
phoP	VSEYHHDLAVID[+576.3]LGLPGMSGLDLIR	824.945	light	0.9991	0.9859	70.41	70.72	-2.8	23515870	0.86	III C
phoP	VSEYHHDLAVID[+576.3]LGLPGMSGLDLIR	824.945	light	0.9964	0.9855	70.41	70.84	-1.9	5920146	0.3288	III M
phoP	VSEYHHDLAVID[+576.3]LGLPGMSGLDLIR	824.945	light	0.9969	0.9858	70.41	70.76	-2.1	39769300	1.2852	IV C
phoP	VSEYHHDLAVID[+576.3]LGLPGMSGLDLIR	824.945	light	0.9932	0.9663	70.41	70.87	-1.7	2181529	0.2283	IV M
phoP	VSEYHHDLAVID[+582.4]LGLPGMSGLDLIR	826.447	heavy	0.9996	0.9907	70.41	70.68	-5.3	227311952	0.5459	I C
phoP	VSEYHHDLAVID[+582.4]LGLPGMSGLDLIR	826.447	heavy	0.9991	0.9831	70.41	70.44	-5.3	259745088	0.9694	I M
phoP	VSEYHHDLAVID[+582.4]LGLPGMSGLDLIR	826.447	heavy	0.9985	0.9859	70.41	70.65	-4.5	113288736	0.9859	II C
phoP	VSEYHHDLAVID[+582.4]LGLPGMSGLDLIR	826.447	heavy	0.9989	0.9845	70.41	70.48	-3.6	191205408	1.0253	II M
phoP	VSEYHHDLAVID[+582.4]LGLPGMSGLDLIR	826.447	heavy	0.9991	0.9902	70.41	70.72	-2.3	27345336	0.86	III C
phoP	VSEYHHDLAVID[+582.4]LGLPGMSGLDLIR	826.447	heavy	0.9964	0.9729	70.41	70.84	-4.2	18006192	0.3288	III M
phoP	VSEYHHDLAVID[+582.4]LGLPGMSGLDLIR	826.447	heavy	0.9969	0.9766	70.41	70.8	-2.4	30945010	1.2852	IV C
phoP	VSEYHHDLAVID[+582.4]LGLPGMSGLDLIR	826.447	heavy	0.9932	0.9788	70.41	70.87	-3.1	9554021	0.2283	IV M
PROCAL Peptides	YSAHEEHHYDK	708.302	light	#N/A	0.9838	13.67	13.71	-0.1	113114104	#N/A	I C
PROCAL Peptides	HEHISSDYAGK	622.289	light	#N/A	#N/A	14.75	14.79	0.1	#N/A	#N/A	I C
PROCAL Peptides	HEHISSDYAGK	415.195	light	#N/A	#N/A	14.75	14.79	-0.1	#N/A	#N/A	I C
PROCAL Peptides	TFAHTESHISK	629.315	light	#N/A	#N/A	15.24	15.23	-0.1	#N/A	#N/A	I C
PROCAL Peptides	TFAHTESHISK	419.879	light	#N/A	#N/A	15.24	15.23	-0.3	#N/A	#N/A	I C
PROCAL Peptides	ISLGEHEGGGK	542.275	light	#N/A	#N/A	16.35	16.37	0.5	#N/A	#N/A	I C
PROCAL Peptides	ISLGEHEGGGK	361.852	light	#N/A	#N/A	16.35	16.37	-0.4	#N/A	#N/A	I C
PROCAL Peptides	LSSGYDGTSYK	589.272	light	#N/A	0.9885	19.88	19.92	-0.1	445129856	#N/A	I C
PROCAL Peptides	TASGVGGFSTK	506.259	light	#N/A	#N/A	19.28	19.31	0.4	#N/A	#N/A	I C
PROCAL Peptides	FGTGTYAGGEK	544.256	light	#N/A	#N/A	18.92	18.94	0.2	#N/A	#N/A	I C
PROCAL Peptides	VGASTGYSGLK	520.275	light	#N/A	#N/A	20.35	20.37	-0.3	#N/A	#N/A	I C
PROCAL Peptides	SYASDFGSSAK	560.251	light	#N/A	#N/A	21.93	21.99	0.4	#N/A	#N/A	I C
PROCAL Peptides	TLIAYDDSSTK	607.301	light	#N/A	#N/A	27.25	27.56	0	#N/A	#N/A	I C
PROCAL Peptides	LYSYYSSTESK	664.306	light	#N/A	#N/A	24.68	24.74	0.1	#N/A	#N/A	I C
PROCAL Peptides	LYTGAGYDEVK	608.298	light	#N/A	#N/A	27.07	27.09	1	#N/A	#N/A	I C
PROCAL Peptides	HLTGLTFDTYK	648.335	light	#N/A	#N/A	35.07	35.12	1.4	#N/A	#N/A	I C
PROCAL Peptides	GFLDYESTGAK	594.283	light	#N/A	#N/A	36.37	36.41	-0.4	#N/A	#N/A	I C
PROCAL Peptides	FLASSEGGFTK	572.288	light	#N/A	0.988	29.37	29.43	0.1	1976232576	#N/A	I C
PROCAL Peptides	YALDSYSLSSK	617.304	light	#N/A	#N/A	36.28	36.3	-0.4	#N/A	#N/A	I C
PROCAL Peptides	FVGTEYDGLAK	600.301	light	#N/A	#N/A	33.65	33.69	0.4	#N/A	#N/A	I C
PROCAL Peptides	HFALFSTDVTK	633.33	light	#N/A	#N/A	40.05	40.08	0.1	#N/A	#N/A	I C
PROCAL Peptides	HDTVFGSYLYK	665.327	light	#N/A	#N/A	38.15	38.21	0.4	#N/A	#N/A	I C
PROCAL Peptides	ALFSSITDSEK	599.304	light	#N/A	#N/A	38.78	38.83	-1.3	#N/A	#N/A	I C
PROCAL Peptides	YFGYTSDTFGK	643.29	light	#N/A	#N/A	40.36	40.37	-0.5	#N/A	#N/A	I C
PROCAL Peptides	TFTGTTDSFFK	626.298	light	#N/A	#N/A	42.96	42.98	0.3	#N/A	#N/A	I C
PROCAL Peptides	VSGFSDISIYK	608.316	light	#N/A	#N/A	44.17	44.19	0.7	#N/A	#N/A	I C
PROCAL Peptides	TFGTETFDTFK	647.304	light	#N/A	#N/A	45.44	45.44	0.3	#N/A	#N/A	I C
PROCAL Peptides	FLFTGYDTSVK	639.324	light	#N/A	#N/A	47.47	47.49	0.2	#N/A	#N/A	I C
PROCAL Peptides	ASDLLSGYYIK	615.324	light	#N/A	#N/A	46.78	46.8	0	#N/A	#N/A	I C
PROCAL Peptides	GIFGAFTDDYK	617.293	light	#N/A	#N/A	52.22	52.23	0.5	#N/A	#N/A	I C
PROCAL Peptides	TSIDSFIDSYK	638.309	light	#N/A	0.9832	50.14	50.16	-0.3	2337958912	#N/A	I C
PROCAL Peptides	VYAETLSGFIK	614.335	light	#N/A	#N/A	47.98	48.01	0.3	#N/A	#N/A	I C
PROCAL Peptides	GFVIDDGLITK	589.327	light	#N/A	#N/A	50.25	50.28	-0.2	#N/A	#N/A	I C
PROCAL Peptides	GASDFLSFAVK	571.298	light	#N/A	#N/A	54.33	54.36	0.9	#N/A	#N/A	I C
PROCAL Peptides	VSSIFFDTFDK	653.322	light	#N/A	#N/A	57.04	57.07	-0.6	#N/A	#N/A	I C
PROCAL Peptides	FFLTGTSIFVK	630.355	light	#N/A	#N/A	61.58	61.62	-3.5	#N/A	#N/A	I C
PROCAL Peptides	GDFTFFIDTFK	669.324	light	#N/A	0.9512	70.94	70.94	-0.5	1597672704	#N/A	I C
PROCAL Peptides	IDVYILALLLK	637.41	light	#N/A	#N/A	84.62	84.63	1.5	#N/A	#N/A	I C
PROCAL Peptides	FLISLLEEYFK	701.387	light	#N/A	#N/A	82.96	82.91	1	#N/A	#N/A	I C
PROCAL Peptides	LFISALVDFFK	650.371	light	#N/A	#N/A	84.45	84.41	0.5	#N/A	#N/A	I C
PROCAL Peptides	SILAFLYLYFK	689.394	light	#N/A	#N/A	88.57	88.52	0.9	#N/A	#N/A	I C
PROCAL Peptides	SLFFIIDGFVK	643.363	light	#N/A	#N/A	78.31	78.32	1.2	#N/A	#N/A	I C
PROCAL Peptides	SLIFFLSTLLK	641.394	light	#N/A	#N/A	87.55	87.5	1.1	#N/A	#N/A	I C
PROCAL Peptides	YSAHEEHHYDK	708.302	light	#N/A	0.9947	13.67	13.69	-0.3	68112576	#N/A	I M
PROCAL Peptides	HEHISSDYAGK	622.289	light	#N/A	#N/A	14.75	14.76	0.2	#N/A	#N/A	I M
PROCAL Peptides	HEHISSDYAGK	415.195	light	#N/A	#N/A	14.75	14.76	-0.1	#N/A	#N/A	I M
PROCAL Peptides	TFAHTESHISK	629.315	light	#N/A	#N/A	15.24	15.27	0	#N/A	#N/A	I M
PROCAL Peptides	TFAHTESHISK	419.879	light	#N/A	#N/A	15.24	15.27	-0.3	#N/A	#N/A	I M
PROCAL Peptides	ISLGEHEGGGK	542.275	light	#N/A	#N/A	16.35	16.42	0.3	#N/A	#N/A	I M
PROCAL Peptides	ISLGEHEGGGK	361.852	light	#N/A	#N/A	16.35	16.42	-0.4	#N/A	#N/A	I M
PROCAL Peptides	LSSGYDGTSYK	589.272	light	#N/A	0.9869	19.88	19.91	-0.1	306242016	#N/A	I M
PROCAL Peptides	TASGVGGFSTK	506.259	light	#N/A	#N/A	19.28	19.36	0.9	#N/A	#N/A	I M
PROCAL Peptides	FGTGTYAGGEK	544.256	light	#N/A	#N/A	18.92	18.99	0.3	#N/A	#N/A	I M
PROCAL Peptides	VGASTGYSGLK	520.275	light	#N/A	#N/A	20.35	20.39	0.1	#N/A	#N/A	I M
PROCAL Peptides	SYASDFGSSAK	560.251	light	#N/A	#N/A	21.93	21.97	0.4	#N/A	#N/A	I M
PROCAL Peptides	TLIAYDDSSTK	607.301	light	#N/A	#N/A	27.25	27.49	0.1	#N/A	#N/A	I M
PROCAL Peptides	LYSYYSSTESK	664.306	light	#N/A	#N/A	24.68	24.66	-0.1	#N/A	#N/A	I M
PROCAL Peptides	LYTGAGYDEVK	608.298	light	#N/A	#N/A	27.07	27.05	0.8	#N/A	#N/A	I M
PROCAL Peptides	HLTGLTFDTYK	648.335	light	#N/A	#N/A	35.07	35.04	0.4	#N/A	#N/A	I M
PROCAL Peptides	GFLDYESTGAK	594.283	light	#N/A	#N/A	36.37	36.32	-0.6	#N/A	#N/A	I M
PROCAL Peptides	FLASSEGGFTK	572.288	light	#N/A	0.9804	29.37	29.33	0.2	1495151488	#N/A	I M
PROCAL Peptides	YALDSYSLSSK	617.304	light	#N/A	#N/A	36.28	36.21	-0.2	#N/A	#N/A	I M
PROCAL Peptides	FVGTEYDGLAK	600.301	light	#N/A	#N/A	33.65	33.6	0	#N/A	#N/A	I M
PROCAL Peptides	HFALFSTDVTK	633.33	light	#N/A	#N/A	40.05	40	-0.6	#N/A	#N/A	I M
PROCAL Peptides	HDTVFGSYLYK	665.327	light	#N/A	#N/A	38.15	38.13	0	#N/A	#N/A	I M
PROCAL Peptides	ALFSSITDSEK	599.304	light	#N/A	#N/A	38.78	38.75	-0.6	#N/A	#N/A	I M
PROCAL Peptides	YFGYTSDTFGK	643.29	light	#N/A	#N/A	40.36	40.3	-0.1	#N/A	#N/A	I M
PROCAL Peptides	TFTGTTDSFFK	626.298	light	#N/A	#N/A	42.96	42.91	0.6	#N/A	#N/A	I M
PROCAL Peptides	VSGFSDISIYK	608.316	light	#N/A	#N/A	44.17	44.13	0.2	#N/A	#N/A	I M
PROCAL Peptides	TFGTETFDTFK	647.304	light	#N/A	#N/A	45.44	45.38	0.1	#N/A	#N/A	I M
PROCAL Peptides	FLFTGYDTSVK	639.324	light	#N/A	#N/A	47.47	47.4	2.1	#N/A	#N/A	I M
PROCAL Peptides	ASDLLSGYYIK	615.324	light	#N/A	#N/A	46.78	46.74	0.5	#N/A	#N/A	I M
PROCAL Peptides	GIFGAFTDDYK	617.293	light	#N/A	#N/A	52.22	52.15	1.2	#N/A	#N/A	I M
PROCAL Peptides	TSIDSFIDSYK	638.309	light	#N/A	0.951	50.14	50.05	-0.6	1073318080	#N/A	I M
PROCAL Peptides	VYAETLSGFIK	614.335	light	#N/A	#N/A	47.98	47.92	2	#N/A	#N/A	I M
PROCAL Peptides	GFVIDDGLITK	589.327	light	#N/A	#N/A	50.25	50.2	-1.1	#N/A	#N/A	I M
PROCAL Peptides	GASDFLSFAVK	571.298	light	#N/A	#N/A	54.33	54.32	0.6	#N/A	#N/A	I M
PROCAL Peptides	VSSIFFDTFDK	653.322	light	#N/A	#N/A	57.04	56.97	4.8	#N/A	#N/A	I M
PROCAL Peptides	FFLTGTSIFVK	630.355	light	#N/A	#N/A	61.58	61.46	0.8	#N/A	#N/A	I M
PROCAL Peptides	GDFTFFIDTFK	669.324	light	#N/A	0.9482	70.94	70.77	-2.8	1272499968	#N/A	I M
PROCAL Peptides	IDVYILALLLK	637.41	light	#N/A	#N/A	84.62	84.42	-0.1	#N/A	#N/A	I M
PROCAL Peptides	FLISLLEEYFK	701.387	light	#N/A	#N/A	82.96	82.66	1.6	#N/A	#N/A	I M
PROCAL Peptides	LFISALVDFFK	650.371	light	#N/A	#N/A	84.45	84.2	0.3	#N/A	#N/A	I M
PROCAL Peptides	SILAFLYLYFK	689.394	light	#N/A	#N/A	88.57	88.21	1.3	#N/A	#N/A	I M
PROCAL Peptides	SLFFIIDGFVK	643.363	light	#N/A	#N/A	78.31	78.17	0.9	#N/A	#N/A	I M
PROCAL Peptides	SLIFFLSTLLK	641.394	light	#N/A	#N/A	87.55	87.37	1.9	#N/A	#N/A	I M
PROCAL Peptides	YSAHEEHHYDK	708.302	light	#N/A	0.9924	13.67	13.62	-0.1	83491208	#N/A	II C
PROCAL Peptides	HEHISSDYAGK	622.289	light	#N/A	#N/A	14.75	14.72	0.3	#N/A	#N/A	II C
PROCAL Peptides	HEHISSDYAGK	415.195	light	#N/A	#N/A	14.75	14.72	0	#N/A	#N/A	II C
PROCAL Peptides	TFAHTESHISK	629.315	light	#N/A	#N/A	15.24	15.23	0	#N/A	#N/A	II C
PROCAL Peptides	TFAHTESHISK	419.879	light	#N/A	#N/A	15.24	15.23	-0.2	#N/A	#N/A	II C
PROCAL Peptides	ISLGEHEGGGK	542.275	light	#N/A	#N/A	16.35	16.33	0.3	#N/A	#N/A	II C
PROCAL Peptides	ISLGEHEGGGK	361.852	light	#N/A	#N/A	16.35	16.33	-0.5	#N/A	#N/A	II C
PROCAL Peptides	LSSGYDGTSYK	589.272	light	#N/A	0.9828	19.88	19.86	0	379627072	#N/A	II C
PROCAL Peptides	TASGVGGFSTK	506.259	light	#N/A	#N/A	19.28	19.27	0.5	#N/A	#N/A	II C
PROCAL Peptides	FGTGTYAGGEK	544.256	light	#N/A	#N/A	18.92	18.9	0.3	#N/A	#N/A	II C
PROCAL Peptides	VGASTGYSGLK	520.275	light	#N/A	#N/A	20.35	20.33	0.1	#N/A	#N/A	II C
PROCAL Peptides	SYASDFGSSAK	560.251	light	#N/A	#N/A	21.93	21.91	0.4	#N/A	#N/A	II C
PROCAL Peptides	TLIAYDDSSTK	607.301	light	#N/A	#N/A	27.25	27.53	-0.3	#N/A	#N/A	II C
PROCAL Peptides	LYSYYSSTESK	664.306	light	#N/A	#N/A	24.68	24.67	-0.2	#N/A	#N/A	II C
PROCAL Peptides	LYTGAGYDEVK	608.298	light	#N/A	#N/A	27.07	27.05	1.1	#N/A	#N/A	II C
PROCAL Peptides	HLTGLTFDTYK	648.335	light	#N/A	#N/A	35.07	35.05	0.4	#N/A	#N/A	II C
PROCAL Peptides	GFLDYESTGAK	594.283	light	#N/A	#N/A	36.37	36.34	-0.3	#N/A	#N/A	II C
PROCAL Peptides	FLASSEGGFTK	572.288	light	#N/A	0.9918	29.37	29.33	-0.1	1691816448	#N/A	II C
PROCAL Peptides	YALDSYSLSSK	617.304	light	#N/A	#N/A	36.28	36.26	-0.4	#N/A	#N/A	II C
PROCAL Peptides	FVGTEYDGLAK	600.301	light	#N/A	#N/A	33.65	33.62	0.1	#N/A	#N/A	II C
PROCAL Peptides	HFALFSTDVTK	633.33	light	#N/A	#N/A	40.05	40.01	0.3	#N/A	#N/A	II C
PROCAL Peptides	HDTVFGSYLYK	665.327	light	#N/A	#N/A	38.15	38.13	-0.2	#N/A	#N/A	II C
PROCAL Peptides	ALFSSITDSEK	599.304	light	#N/A	#N/A	38.78	38.76	-0.3	#N/A	#N/A	II C
PROCAL Peptides	YFGYTSDTFGK	643.29	light	#N/A	#N/A	40.36	40.34	-0.2	#N/A	#N/A	II C
PROCAL Peptides	TFTGTTDSFFK	626.298	light	#N/A	#N/A	42.96	42.94	0.1	#N/A	#N/A	II C
PROCAL Peptides	VSGFSDISIYK	608.316	light	#N/A	#N/A	44.17	44.15	0.5	#N/A	#N/A	II C
PROCAL Peptides	TFGTETFDTFK	647.304	light	#N/A	#N/A	45.44	45.44	0.3	#N/A	#N/A	II C
PROCAL Peptides	FLFTGYDTSVK	639.324	light	#N/A	#N/A	47.47	47.46	-0.2	#N/A	#N/A	II C
PROCAL Peptides	ASDLLSGYYIK	615.324	light	#N/A	#N/A	46.78	46.76	0.1	#N/A	#N/A	II C
PROCAL Peptides	GIFGAFTDDYK	617.293	light	#N/A	#N/A	52.22	52.19	0.2	#N/A	#N/A	II C
PROCAL Peptides	TSIDSFIDSYK	638.309	light	#N/A	0.9932	50.14	50.14	0.2	2740626944	#N/A	II C
PROCAL Peptides	VYAETLSGFIK	614.335	light	#N/A	#N/A	47.98	47.97	0.8	#N/A	#N/A	II C
PROCAL Peptides	GFVIDDGLITK	589.327	light	#N/A	#N/A	50.25	50.25	0.6	#N/A	#N/A	II C
PROCAL Peptides	GASDFLSFAVK	571.298	light	#N/A	#N/A	54.33	54.32	0.3	#N/A	#N/A	II C
PROCAL Peptides	VSSIFFDTFDK	653.322	light	#N/A	#N/A	57.04	57.03	-0.7	#N/A	#N/A	II C
PROCAL Peptides	FFLTGTSIFVK	630.355	light	#N/A	#N/A	61.58	61.51	1.1	#N/A	#N/A	II C
PROCAL Peptides	GDFTFFIDTFK	669.324	light	#N/A	0.954	70.94	70.94	-0.2	1348147072	#N/A	II C
PROCAL Peptides	IDVYILALLLK	637.41	light	#N/A	#N/A	84.62	84.6	0.9	#N/A	#N/A	II C
PROCAL Peptides	FLISLLEEYFK	701.387	light	#N/A	#N/A	82.96	82.94	1	#N/A	#N/A	II C
PROCAL Peptides	LFISALVDFFK	650.371	light	#N/A	#N/A	84.45	84.45	0.7	#N/A	#N/A	II C
PROCAL Peptides	SILAFLYLYFK	689.394	light	#N/A	#N/A	88.57	88.49	0.9	#N/A	#N/A	II C
PROCAL Peptides	SLFFIIDGFVK	643.363	light	#N/A	#N/A	78.31	78.28	1.8	#N/A	#N/A	II C
PROCAL Peptides	SLIFFLSTLLK	641.394	light	#N/A	#N/A	87.55	87.5	1.4	#N/A	#N/A	II C
PROCAL Peptides	YSAHEEHHYDK	708.302	light	#N/A	0.9941	13.67	13.66	-0.1	53587600	#N/A	II M
PROCAL Peptides	HEHISSDYAGK	622.289	light	#N/A	#N/A	14.75	14.8	0.3	#N/A	#N/A	II M
PROCAL Peptides	HEHISSDYAGK	415.195	light	#N/A	#N/A	14.75	14.8	-0.1	#N/A	#N/A	II M
PROCAL Peptides	TFAHTESHISK	629.315	light	#N/A	#N/A	15.24	15.27	0	#N/A	#N/A	II M
PROCAL Peptides	TFAHTESHISK	419.879	light	#N/A	#N/A	15.24	15.27	-0.1	#N/A	#N/A	II M
PROCAL Peptides	ISLGEHEGGGK	542.275	light	#N/A	#N/A	16.35	16.42	0.3	#N/A	#N/A	II M
PROCAL Peptides	ISLGEHEGGGK	361.852	light	#N/A	#N/A	16.35	16.42	-0.5	#N/A	#N/A	II M
PROCAL Peptides	LSSGYDGTSYK	589.272	light	#N/A	0.9738	19.88	19.91	-0.2	323645120	#N/A	II M
PROCAL Peptides	TASGVGGFSTK	506.259	light	#N/A	#N/A	19.28	19.36	0.6	#N/A	#N/A	II M
PROCAL Peptides	FGTGTYAGGEK	544.256	light	#N/A	#N/A	18.92	18.99	0.4	#N/A	#N/A	II M
PROCAL Peptides	VGASTGYSGLK	520.275	light	#N/A	#N/A	20.35	20.39	0.1	#N/A	#N/A	II M
PROCAL Peptides	SYASDFGSSAK	560.251	light	#N/A	#N/A	21.93	21.94	0.4	#N/A	#N/A	II M
PROCAL Peptides	TLIAYDDSSTK	607.301	light	#N/A	#N/A	27.25	27.46	-0.3	#N/A	#N/A	II M
PROCAL Peptides	LYSYYSSTESK	664.306	light	#N/A	#N/A	24.68	24.66	0	#N/A	#N/A	II M
PROCAL Peptides	LYTGAGYDEVK	608.298	light	#N/A	#N/A	27.07	26.98	0.8	#N/A	#N/A	II M
PROCAL Peptides	HLTGLTFDTYK	648.335	light	#N/A	#N/A	35.07	35	0.4	#N/A	#N/A	II M
PROCAL Peptides	GFLDYESTGAK	594.283	light	#N/A	#N/A	36.37	36.29	-0.5	#N/A	#N/A	II M
PROCAL Peptides	FLASSEGGFTK	572.288	light	#N/A	0.9867	29.37	29.3	0.2	1426855040	#N/A	II M
PROCAL Peptides	YALDSYSLSSK	617.304	light	#N/A	#N/A	36.28	36.18	-0.4	#N/A	#N/A	II M
PROCAL Peptides	FVGTEYDGLAK	600.301	light	#N/A	#N/A	33.65	33.56	0.2	#N/A	#N/A	II M
PROCAL Peptides	HFALFSTDVTK	633.33	light	#N/A	#N/A	40.05	39.97	-0.1	#N/A	#N/A	II M
PROCAL Peptides	HDTVFGSYLYK	665.327	light	#N/A	#N/A	38.15	38.05	0.2	#N/A	#N/A	II M
PROCAL Peptides	ALFSSITDSEK	599.304	light	#N/A	#N/A	38.78	38.68	-0.2	#N/A	#N/A	II M
PROCAL Peptides	YFGYTSDTFGK	643.29	light	#N/A	#N/A	40.36	40.26	-0.1	#N/A	#N/A	II M
PROCAL Peptides	TFTGTTDSFFK	626.298	light	#N/A	#N/A	42.96	42.91	0.5	#N/A	#N/A	II M
PROCAL Peptides	VSGFSDISIYK	608.316	light	#N/A	#N/A	44.17	44.09	1.9	#N/A	#N/A	II M
PROCAL Peptides	TFGTETFDTFK	647.304	light	#N/A	#N/A	45.44	45.41	0.8	#N/A	#N/A	II M
PROCAL Peptides	FLFTGYDTSVK	639.324	light	#N/A	#N/A	47.47	47.44	1.8	#N/A	#N/A	II M
PROCAL Peptides	ASDLLSGYYIK	615.324	light	#N/A	#N/A	46.78	46.78	0.4	#N/A	#N/A	II M
PROCAL Peptides	GIFGAFTDDYK	617.293	light	#N/A	#N/A	52.22	52.15	0.9	#N/A	#N/A	II M
PROCAL Peptides	TSIDSFIDSYK	638.309	light	#N/A	0.9568	50.14	50.05	0.9	934832448	#N/A	II M
PROCAL Peptides	VYAETLSGFIK	614.335	light	#N/A	#N/A	47.98	47.88	1.8	#N/A	#N/A	II M
PROCAL Peptides	GFVIDDGLITK	589.327	light	#N/A	#N/A	50.25	50.16	3.3	#N/A	#N/A	II M
PROCAL Peptides	GASDFLSFAVK	571.298	light	#N/A	#N/A	54.33	54.28	0.6	#N/A	#N/A	II M
PROCAL Peptides	VSSIFFDTFDK	653.322	light	#N/A	#N/A	57.04	56.93	3.2	#N/A	#N/A	II M
PROCAL Peptides	FFLTGTSIFVK	630.355	light	#N/A	#N/A	61.58	61.42	0.7	#N/A	#N/A	II M
PROCAL Peptides	GDFTFFIDTFK	669.324	light	#N/A	0.9559	70.94	70.81	-2.1	1074156160	#N/A	II M
PROCAL Peptides	IDVYILALLLK	637.41	light	#N/A	#N/A	84.62	84.42	1.9	#N/A	#N/A	II M
PROCAL Peptides	FLISLLEEYFK	701.387	light	#N/A	#N/A	82.96	82.69	2.2	#N/A	#N/A	II M
PROCAL Peptides	LFISALVDFFK	650.371	light	#N/A	#N/A	84.45	84.24	1.6	#N/A	#N/A	II M
PROCAL Peptides	SILAFLYLYFK	689.394	light	#N/A	#N/A	88.57	88.25	1	#N/A	#N/A	II M
PROCAL Peptides	SLFFIIDGFVK	643.363	light	#N/A	#N/A	78.31	78.17	1	#N/A	#N/A	II M
PROCAL Peptides	SLIFFLSTLLK	641.394	light	#N/A	#N/A	87.55	87.29	1.9	#N/A	#N/A	II M
PROCAL Peptides	YSAHEEHHYDK	708.302	light	#N/A	0.9867	13.67	13.57	0	36311692	#N/A	III C
PROCAL Peptides	HEHISSDYAGK	622.289	light	#N/A	#N/A	14.75	14.72	0.2	#N/A	#N/A	III C
PROCAL Peptides	HEHISSDYAGK	415.195	light	#N/A	#N/A	14.75	14.72	-0.2	#N/A	#N/A	III C
PROCAL Peptides	TFAHTESHISK	629.315	light	#N/A	#N/A	15.24	15.2	0	#N/A	#N/A	III C
PROCAL Peptides	TFAHTESHISK	419.879	light	#N/A	#N/A	15.24	15.2	-0.2	#N/A	#N/A	III C
PROCAL Peptides	ISLGEHEGGGK	542.275	light	#N/A	#N/A	16.35	16.3	0.5	#N/A	#N/A	III C
PROCAL Peptides	ISLGEHEGGGK	361.852	light	#N/A	#N/A	16.35	16.3	-0.4	#N/A	#N/A	III C
PROCAL Peptides	LSSGYDGTSYK	589.272	light	#N/A	0.9784	19.88	19.81	-0.1	413565120	#N/A	III C
PROCAL Peptides	TASGVGGFSTK	506.259	light	#N/A	#N/A	19.28	19.2	0.5	#N/A	#N/A	III C
PROCAL Peptides	FGTGTYAGGEK	544.256	light	#N/A	#N/A	18.92	18.83	0.2	#N/A	#N/A	III C
PROCAL Peptides	VGASTGYSGLK	520.275	light	#N/A	#N/A	20.35	20.3	0.3	#N/A	#N/A	III C
PROCAL Peptides	SYASDFGSSAK	560.251	light	#N/A	#N/A	21.93	21.88	0.2	#N/A	#N/A	III C
PROCAL Peptides	TLIAYDDSSTK	607.301	light	#N/A	#N/A	27.25	27.49	-0.1	#N/A	#N/A	III C
PROCAL Peptides	LYSYYSSTESK	664.306	light	#N/A	#N/A	24.68	24.63	-0.3	#N/A	#N/A	III C
PROCAL Peptides	LYTGAGYDEVK	608.298	light	#N/A	#N/A	27.07	27.01	0.9	#N/A	#N/A	III C
PROCAL Peptides	HLTGLTFDTYK	648.335	light	#N/A	#N/A	35.07	34.98	0.6	#N/A	#N/A	III C
PROCAL Peptides	GFLDYESTGAK	594.283	light	#N/A	#N/A	36.37	36.34	-0.2	#N/A	#N/A	III C
PROCAL Peptides	FLASSEGGFTK	572.288	light	#N/A	0.9838	29.37	29.32	0.1	1691139200	#N/A	III C
PROCAL Peptides	YALDSYSLSSK	617.304	light	#N/A	#N/A	36.28	36.23	-0.3	#N/A	#N/A	III C
PROCAL Peptides	FVGTEYDGLAK	600.301	light	#N/A	#N/A	33.65	33.62	0.3	#N/A	#N/A	III C
PROCAL Peptides	HFALFSTDVTK	633.33	light	#N/A	#N/A	40.05	39.97	0.3	#N/A	#N/A	III C
PROCAL Peptides	HDTVFGSYLYK	665.327	light	#N/A	#N/A	38.15	38.1	-0.3	#N/A	#N/A	III C
PROCAL Peptides	ALFSSITDSEK	599.304	light	#N/A	#N/A	38.78	38.72	-0.1	#N/A	#N/A	III C
PROCAL Peptides	YFGYTSDTFGK	643.29	light	#N/A	#N/A	40.36	40.34	0	#N/A	#N/A	III C
PROCAL Peptides	TFTGTTDSFFK	626.298	light	#N/A	#N/A	42.96	42.94	0.2	#N/A	#N/A	III C
PROCAL Peptides	VSGFSDISIYK	608.316	light	#N/A	#N/A	44.17	44.15	0	#N/A	#N/A	III C
PROCAL Peptides	TFGTETFDTFK	647.304	light	#N/A	#N/A	45.44	45.44	0.2	#N/A	#N/A	III C
PROCAL Peptides	FLFTGYDTSVK	639.324	light	#N/A	#N/A	47.47	47.46	-0.3	#N/A	#N/A	III C
PROCAL Peptides	ASDLLSGYYIK	615.324	light	#N/A	#N/A	46.78	46.76	-0.1	#N/A	#N/A	III C
PROCAL Peptides	GIFGAFTDDYK	617.293	light	#N/A	#N/A	52.22	52.23	0.4	#N/A	#N/A	III C
PROCAL Peptides	TSIDSFIDSYK	638.309	light	#N/A	0.9927	50.14	50.14	-0.6	3160167424	#N/A	III C
PROCAL Peptides	VYAETLSGFIK	614.335	light	#N/A	#N/A	47.98	47.97	0.1	#N/A	#N/A	III C
PROCAL Peptides	GFVIDDGLITK	589.327	light	#N/A	#N/A	50.25	50.25	-0.2	#N/A	#N/A	III C
PROCAL Peptides	GASDFLSFAVK	571.298	light	#N/A	#N/A	54.33	54.32	-0.3	#N/A	#N/A	III C
PROCAL Peptides	VSSIFFDTFDK	653.322	light	#N/A	#N/A	57.04	57.03	0.3	#N/A	#N/A	III C
PROCAL Peptides	FFLTGTSIFVK	630.355	light	#N/A	#N/A	61.58	61.59	-0.6	#N/A	#N/A	III C
PROCAL Peptides	GDFTFFIDTFK	669.324	light	#N/A	0.9808	70.94	70.98	-0.3	2263256832	#N/A	III C
PROCAL Peptides	IDVYILALLLK	637.41	light	#N/A	#N/A	84.62	84.71	0.2	#N/A	#N/A	III C
PROCAL Peptides	FLISLLEEYFK	701.387	light	#N/A	#N/A	82.96	83.06	0	#N/A	#N/A	III C
PROCAL Peptides	LFISALVDFFK	650.371	light	#N/A	#N/A	84.45	84.52	0.4	#N/A	#N/A	III C
PROCAL Peptides	SILAFLYLYFK	689.394	light	#N/A	#N/A	88.57	88.71	0.7	#N/A	#N/A	III C
PROCAL Peptides	SLFFIIDGFVK	643.363	light	#N/A	#N/A	78.31	78.36	0.2	#N/A	#N/A	III C
PROCAL Peptides	SLIFFLSTLLK	641.394	light	#N/A	#N/A	87.55	87.68	0.2	#N/A	#N/A	III C
PROCAL Peptides	YSAHEEHHYDK	708.302	light	#N/A	0.9908	13.67	13.57	-0.5	50710168	#N/A	III M
PROCAL Peptides	HEHISSDYAGK	622.289	light	#N/A	#N/A	14.75	14.72	0	#N/A	#N/A	III M
PROCAL Peptides	HEHISSDYAGK	415.195	light	#N/A	#N/A	14.75	14.72	-0.1	#N/A	#N/A	III M
PROCAL Peptides	TFAHTESHISK	629.315	light	#N/A	#N/A	15.24	15.2	-0.1	#N/A	#N/A	III M
PROCAL Peptides	TFAHTESHISK	419.879	light	#N/A	#N/A	15.24	15.2	-0.2	#N/A	#N/A	III M
PROCAL Peptides	ISLGEHEGGGK	542.275	light	#N/A	#N/A	16.35	16.31	0.3	#N/A	#N/A	III M
PROCAL Peptides	ISLGEHEGGGK	361.852	light	#N/A	#N/A	16.35	16.31	-0.4	#N/A	#N/A	III M
PROCAL Peptides	LSSGYDGTSYK	589.272	light	#N/A	0.976	19.88	19.83	-0.1	381963328	#N/A	III M
PROCAL Peptides	TASGVGGFSTK	506.259	light	#N/A	#N/A	19.28	19.25	0.6	#N/A	#N/A	III M
PROCAL Peptides	FGTGTYAGGEK	544.256	light	#N/A	#N/A	18.92	18.88	0.2	#N/A	#N/A	III M
PROCAL Peptides	VGASTGYSGLK	520.275	light	#N/A	#N/A	20.35	20.32	0.3	#N/A	#N/A	III M
PROCAL Peptides	SYASDFGSSAK	560.251	light	#N/A	#N/A	21.93	21.9	0.1	#N/A	#N/A	III M
PROCAL Peptides	TLIAYDDSSTK	607.301	light	#N/A	#N/A	27.25	27.49	-0.1	#N/A	#N/A	III M
PROCAL Peptides	LYSYYSSTESK	664.306	light	#N/A	#N/A	24.68	24.66	-0.1	#N/A	#N/A	III M
PROCAL Peptides	LYTGAGYDEVK	608.298	light	#N/A	#N/A	27.07	27.05	0.8	#N/A	#N/A	III M
PROCAL Peptides	HLTGLTFDTYK	648.335	light	#N/A	#N/A	35.07	35.07	0.5	#N/A	#N/A	III M
PROCAL Peptides	GFLDYESTGAK	594.283	light	#N/A	#N/A	36.37	36.4	-0.3	#N/A	#N/A	III M
PROCAL Peptides	FLASSEGGFTK	572.288	light	#N/A	0.9904	29.37	29.36	0.2	1719081728	#N/A	III M
PROCAL Peptides	YALDSYSLSSK	617.304	light	#N/A	#N/A	36.28	36.29	-0.4	#N/A	#N/A	III M
PROCAL Peptides	FVGTEYDGLAK	600.301	light	#N/A	#N/A	33.65	33.67	0.2	#N/A	#N/A	III M
PROCAL Peptides	HFALFSTDVTK	633.33	light	#N/A	#N/A	40.05	40.08	0.1	#N/A	#N/A	III M
PROCAL Peptides	HDTVFGSYLYK	665.327	light	#N/A	#N/A	38.15	38.16	0.2	#N/A	#N/A	III M
PROCAL Peptides	ALFSSITDSEK	599.304	light	#N/A	#N/A	38.78	38.79	-0.3	#N/A	#N/A	III M
PROCAL Peptides	YFGYTSDTFGK	643.29	light	#N/A	#N/A	40.36	40.37	-0.2	#N/A	#N/A	III M
PROCAL Peptides	TFTGTTDSFFK	626.298	light	#N/A	#N/A	42.96	43.02	0.2	#N/A	#N/A	III M
PROCAL Peptides	VSGFSDISIYK	608.316	light	#N/A	#N/A	44.17	44.2	0.1	#N/A	#N/A	III M
PROCAL Peptides	TFGTETFDTFK	647.304	light	#N/A	#N/A	45.44	45.49	0.1	#N/A	#N/A	III M
PROCAL Peptides	FLFTGYDTSVK	639.324	light	#N/A	#N/A	47.47	47.51	-0.1	#N/A	#N/A	III M
PROCAL Peptides	ASDLLSGYYIK	615.324	light	#N/A	#N/A	46.78	46.81	-0.1	#N/A	#N/A	III M
PROCAL Peptides	GIFGAFTDDYK	617.293	light	#N/A	#N/A	52.22	52.26	0.2	#N/A	#N/A	III M
PROCAL Peptides	TSIDSFIDSYK	638.309	light	#N/A	0.9912	50.14	50.15	-0.1	2883517184	#N/A	III M
PROCAL Peptides	VYAETLSGFIK	614.335	light	#N/A	#N/A	47.98	48.03	0.2	#N/A	#N/A	III M
PROCAL Peptides	GFVIDDGLITK	589.327	light	#N/A	#N/A	50.25	50.27	-0.7	#N/A	#N/A	III M
PROCAL Peptides	GASDFLSFAVK	571.298	light	#N/A	#N/A	54.33	54.39	0.2	#N/A	#N/A	III M
PROCAL Peptides	VSSIFFDTFDK	653.322	light	#N/A	#N/A	57.04	57.08	-0.2	#N/A	#N/A	III M
PROCAL Peptides	FFLTGTSIFVK	630.355	light	#N/A	#N/A	61.58	61.61	-0.2	#N/A	#N/A	III M
PROCAL Peptides	GDFTFFIDTFK	669.324	light	#N/A	0.9873	70.94	70.98	-0.6	4340985856	#N/A	III M
PROCAL Peptides	IDVYILALLLK	637.41	light	#N/A	#N/A	84.62	84.68	0.2	#N/A	#N/A	III M
PROCAL Peptides	FLISLLEEYFK	701.387	light	#N/A	#N/A	82.96	83.06	-0.1	#N/A	#N/A	III M
PROCAL Peptides	LFISALVDFFK	650.371	light	#N/A	#N/A	84.45	84.53	0	#N/A	#N/A	III M
PROCAL Peptides	SILAFLYLYFK	689.394	light	#N/A	#N/A	88.57	88.76	0.2	#N/A	#N/A	III M
PROCAL Peptides	SLFFIIDGFVK	643.363	light	#N/A	#N/A	78.31	78.39	0.4	#N/A	#N/A	III M
PROCAL Peptides	SLIFFLSTLLK	641.394	light	#N/A	#N/A	87.55	87.7	-0.1	#N/A	#N/A	III M
PROCAL Peptides	YSAHEEHHYDK	708.302	light	#N/A	0.9842	13.67	13.6	-0.3	33619288	#N/A	IV C
PROCAL Peptides	HEHISSDYAGK	622.289	light	#N/A	#N/A	14.75	14.72	0	#N/A	#N/A	IV C
PROCAL Peptides	HEHISSDYAGK	415.195	light	#N/A	#N/A	14.75	14.72	-0.2	#N/A	#N/A	IV C
PROCAL Peptides	TFAHTESHISK	629.315	light	#N/A	#N/A	15.24	15.2	-0.1	#N/A	#N/A	IV C
PROCAL Peptides	TFAHTESHISK	419.879	light	#N/A	#N/A	15.24	15.2	-0.3	#N/A	#N/A	IV C
PROCAL Peptides	ISLGEHEGGGK	542.275	light	#N/A	#N/A	16.35	16.3	0.3	#N/A	#N/A	IV C
PROCAL Peptides	ISLGEHEGGGK	361.852	light	#N/A	#N/A	16.35	16.3	-0.6	#N/A	#N/A	IV C
PROCAL Peptides	LSSGYDGTSYK	589.272	light	#N/A	0.9873	19.88	19.85	0	403563968	#N/A	IV C
PROCAL Peptides	TASGVGGFSTK	506.259	light	#N/A	#N/A	19.28	19.2	0.6	#N/A	#N/A	IV C
PROCAL Peptides	FGTGTYAGGEK	544.256	light	#N/A	#N/A	18.92	18.83	0.3	#N/A	#N/A	IV C
PROCAL Peptides	VGASTGYSGLK	520.275	light	#N/A	#N/A	20.35	20.3	0.1	#N/A	#N/A	IV C
PROCAL Peptides	SYASDFGSSAK	560.251	light	#N/A	#N/A	21.93	21.88	0.2	#N/A	#N/A	IV C
PROCAL Peptides	TLIAYDDSSTK	607.301	light	#N/A	#N/A	27.25	27.49	-0.1	#N/A	#N/A	IV C
PROCAL Peptides	LYSYYSSTESK	664.306	light	#N/A	#N/A	24.68	24.67	-0.1	#N/A	#N/A	IV C
PROCAL Peptides	LYTGAGYDEVK	608.298	light	#N/A	#N/A	27.07	27.05	1	#N/A	#N/A	IV C
PROCAL Peptides	HLTGLTFDTYK	648.335	light	#N/A	#N/A	35.07	35.12	0.6	#N/A	#N/A	IV C
PROCAL Peptides	GFLDYESTGAK	594.283	light	#N/A	#N/A	36.37	36.41	-0.2	#N/A	#N/A	IV C
PROCAL Peptides	FLASSEGGFTK	572.288	light	#N/A	0.9866	29.37	29.35	0.1	2162998016	#N/A	IV C
PROCAL Peptides	YALDSYSLSSK	617.304	light	#N/A	#N/A	36.28	36.3	-0.4	#N/A	#N/A	IV C
PROCAL Peptides	FVGTEYDGLAK	600.301	light	#N/A	#N/A	33.65	33.66	0.3	#N/A	#N/A	IV C
PROCAL Peptides	HFALFSTDVTK	633.33	light	#N/A	#N/A	40.05	40.08	0.4	#N/A	#N/A	IV C
PROCAL Peptides	HDTVFGSYLYK	665.327	light	#N/A	#N/A	38.15	38.21	0	#N/A	#N/A	IV C
PROCAL Peptides	ALFSSITDSEK	599.304	light	#N/A	#N/A	38.78	38.79	-0.4	#N/A	#N/A	IV C
PROCAL Peptides	YFGYTSDTFGK	643.29	light	#N/A	#N/A	40.36	40.37	-0.2	#N/A	#N/A	IV C
PROCAL Peptides	TFTGTTDSFFK	626.298	light	#N/A	#N/A	42.96	43.02	0.3	#N/A	#N/A	IV C
PROCAL Peptides	VSGFSDISIYK	608.316	light	#N/A	#N/A	44.17	44.19	0.1	#N/A	#N/A	IV C
PROCAL Peptides	TFGTETFDTFK	647.304	light	#N/A	#N/A	45.44	45.47	0.3	#N/A	#N/A	IV C
PROCAL Peptides	FLFTGYDTSVK	639.324	light	#N/A	#N/A	47.47	47.53	-0.5	#N/A	#N/A	IV C
PROCAL Peptides	ASDLLSGYYIK	615.324	light	#N/A	#N/A	46.78	46.83	0	#N/A	#N/A	IV C
PROCAL Peptides	GIFGAFTDDYK	617.293	light	#N/A	#N/A	52.22	52.26	0.1	#N/A	#N/A	IV C
PROCAL Peptides	TSIDSFIDSYK	638.309	light	#N/A	0.9893	50.14	50.2	-0.2	2210175488	#N/A	IV C
PROCAL Peptides	VYAETLSGFIK	614.335	light	#N/A	#N/A	47.98	48.04	0	#N/A	#N/A	IV C
PROCAL Peptides	GFVIDDGLITK	589.327	light	#N/A	#N/A	50.25	50.32	-0.5	#N/A	#N/A	IV C
PROCAL Peptides	GASDFLSFAVK	571.298	light	#N/A	#N/A	54.33	54.39	0.3	#N/A	#N/A	IV C
PROCAL Peptides	VSSIFFDTFDK	653.322	light	#N/A	#N/A	57.04	57.07	0.1	#N/A	#N/A	IV C
PROCAL Peptides	FFLTGTSIFVK	630.355	light	#N/A	#N/A	61.58	61.66	0.5	#N/A	#N/A	IV C
PROCAL Peptides	GDFTFFIDTFK	669.324	light	#N/A	0.983	70.94	71.02	-0.8	2551823872	#N/A	IV C
PROCAL Peptides	IDVYILALLLK	637.41	light	#N/A	#N/A	84.62	84.71	0.3	#N/A	#N/A	IV C
PROCAL Peptides	FLISLLEEYFK	701.387	light	#N/A	#N/A	82.96	83.09	0	#N/A	#N/A	IV C
PROCAL Peptides	LFISALVDFFK	650.371	light	#N/A	#N/A	84.45	84.56	0.3	#N/A	#N/A	IV C
PROCAL Peptides	SILAFLYLYFK	689.394	light	#N/A	#N/A	88.57	88.82	0.3	#N/A	#N/A	IV C
PROCAL Peptides	SLFFIIDGFVK	643.363	light	#N/A	#N/A	78.31	78.39	0.3	#N/A	#N/A	IV C
PROCAL Peptides	SLIFFLSTLLK	641.394	light	#N/A	#N/A	87.55	87.75	0.2	#N/A	#N/A	IV C
PROCAL Peptides	YSAHEEHHYDK	708.302	light	#N/A	0.9762	13.67	13.66	-0.3	32128738	#N/A	IV M
PROCAL Peptides	HEHISSDYAGK	622.289	light	#N/A	#N/A	14.75	14.72	0	#N/A	#N/A	IV M
PROCAL Peptides	HEHISSDYAGK	415.195	light	#N/A	#N/A	14.75	14.72	-0.2	#N/A	#N/A	IV M
PROCAL Peptides	TFAHTESHISK	629.315	light	#N/A	#N/A	15.24	15.2	0.1	#N/A	#N/A	IV M
PROCAL Peptides	TFAHTESHISK	419.879	light	#N/A	#N/A	15.24	15.2	-0.2	#N/A	#N/A	IV M
PROCAL Peptides	ISLGEHEGGGK	542.275	light	#N/A	#N/A	16.35	16.3	0.2	#N/A	#N/A	IV M
PROCAL Peptides	ISLGEHEGGGK	361.852	light	#N/A	#N/A	16.35	16.3	-0.6	#N/A	#N/A	IV M
PROCAL Peptides	LSSGYDGTSYK	589.272	light	#N/A	0.9804	19.88	19.86	0.1	552922496	#N/A	IV M
PROCAL Peptides	TASGVGGFSTK	506.259	light	#N/A	#N/A	19.28	19.23	0.5	#N/A	#N/A	IV M
PROCAL Peptides	FGTGTYAGGEK	544.256	light	#N/A	#N/A	18.92	18.87	0.1	#N/A	#N/A	IV M
PROCAL Peptides	VGASTGYSGLK	520.275	light	#N/A	#N/A	20.35	20.3	0.3	#N/A	#N/A	IV M
PROCAL Peptides	SYASDFGSSAK	560.251	light	#N/A	#N/A	21.93	21.88	0	#N/A	#N/A	IV M
PROCAL Peptides	TLIAYDDSSTK	607.301	light	#N/A	#N/A	27.25	27.53	-0.4	#N/A	#N/A	IV M
PROCAL Peptides	LYSYYSSTESK	664.306	light	#N/A	#N/A	24.68	24.67	-0.1	#N/A	#N/A	IV M
PROCAL Peptides	LYTGAGYDEVK	608.298	light	#N/A	#N/A	27.07	27.09	1.2	#N/A	#N/A	IV M
PROCAL Peptides	HLTGLTFDTYK	648.335	light	#N/A	#N/A	35.07	35.09	0.2	#N/A	#N/A	IV M
PROCAL Peptides	GFLDYESTGAK	594.283	light	#N/A	#N/A	36.37	36.41	-0.1	#N/A	#N/A	IV M
PROCAL Peptides	FLASSEGGFTK	572.288	light	#N/A	0.9928	29.37	29.36	-0.1	2510686464	#N/A	IV M
PROCAL Peptides	YALDSYSLSSK	617.304	light	#N/A	#N/A	36.28	36.3	-0.2	#N/A	#N/A	IV M
PROCAL Peptides	FVGTEYDGLAK	600.301	light	#N/A	#N/A	33.65	33.66	0	#N/A	#N/A	IV M
PROCAL Peptides	HFALFSTDVTK	633.33	light	#N/A	#N/A	40.05	40.08	0.1	#N/A	#N/A	IV M
PROCAL Peptides	HDTVFGSYLYK	665.327	light	#N/A	#N/A	38.15	38.21	0.3	#N/A	#N/A	IV M
PROCAL Peptides	ALFSSITDSEK	599.304	light	#N/A	#N/A	38.78	38.79	-0.2	#N/A	#N/A	IV M
PROCAL Peptides	YFGYTSDTFGK	643.29	light	#N/A	#N/A	40.36	40.37	-0.3	#N/A	#N/A	IV M
PROCAL Peptides	TFTGTTDSFFK	626.298	light	#N/A	#N/A	42.96	43.02	0.2	#N/A	#N/A	IV M
PROCAL Peptides	VSGFSDISIYK	608.316	light	#N/A	#N/A	44.17	44.19	0.2	#N/A	#N/A	IV M
PROCAL Peptides	TFGTETFDTFK	647.304	light	#N/A	#N/A	45.44	45.51	0	#N/A	#N/A	IV M
PROCAL Peptides	FLFTGYDTSVK	639.324	light	#N/A	#N/A	47.47	47.49	-0.1	#N/A	#N/A	IV M
PROCAL Peptides	ASDLLSGYYIK	615.324	light	#N/A	#N/A	46.78	46.8	0.1	#N/A	#N/A	IV M
PROCAL Peptides	GIFGAFTDDYK	617.293	light	#N/A	#N/A	52.22	52.3	0.1	#N/A	#N/A	IV M
PROCAL Peptides	TSIDSFIDSYK	638.309	light	#N/A	0.9934	50.14	50.21	-0.4	3247574784	#N/A	IV M
PROCAL Peptides	VYAETLSGFIK	614.335	light	#N/A	#N/A	47.98	48.04	0.1	#N/A	#N/A	IV M
PROCAL Peptides	GFVIDDGLITK	589.327	light	#N/A	#N/A	50.25	50.32	-0.2	#N/A	#N/A	IV M
PROCAL Peptides	GASDFLSFAVK	571.298	light	#N/A	#N/A	54.33	54.39	0.1	#N/A	#N/A	IV M
PROCAL Peptides	VSSIFFDTFDK	653.322	light	#N/A	#N/A	57.04	57.11	0.1	#N/A	#N/A	IV M
PROCAL Peptides	FFLTGTSIFVK	630.355	light	#N/A	#N/A	61.58	61.66	-0.4	#N/A	#N/A	IV M
PROCAL Peptides	GDFTFFIDTFK	669.324	light	#N/A	0.9859	70.94	71.05	-0.1	4442551808	#N/A	IV M
PROCAL Peptides	IDVYILALLLK	637.41	light	#N/A	#N/A	84.62	84.74	0.2	#N/A	#N/A	IV M
PROCAL Peptides	FLISLLEEYFK	701.387	light	#N/A	#N/A	82.96	83.13	0.3	#N/A	#N/A	IV M
PROCAL Peptides	LFISALVDFFK	650.371	light	#N/A	#N/A	84.45	84.6	0	#N/A	#N/A	IV M
PROCAL Peptides	SILAFLYLYFK	689.394	light	#N/A	#N/A	88.57	88.82	0.2	#N/A	#N/A	IV M
PROCAL Peptides	SLFFIIDGFVK	643.363	light	#N/A	#N/A	78.31	78.47	0.3	#N/A	#N/A	IV M
PROCAL Peptides	SLIFFLSTLLK	641.394	light	#N/A	#N/A	87.55	87.75	0.2	#N/A	#N/A	IV M

## Sheet: 5 PRM results (30 min Dyn)
Gene name	Peptide modified sequence	Precursor [mz]	Isotope label type	Dot product (L/H)	Library dot product	Best retention time [min]	Average mass error [ppm]	Total area fragment	Ratio (L/H)	Replicate name
cprR	ANRYDVILLD[+576.3]IMLPR	793.454	light	0.9572	0.986	70.51	-11.4	56105848	18.7915	I C
cprR	ANRYDVILLD[+576.3]IMLPR	793.454	light	0.9654	0.9881	70.32	-12.1	49567636	16.9179	I M
cprR	ANRYDVILLD[+576.3]IMLPR	793.454	light	0.9565	0.9886	70.56	-12	39150656	21.6629	II C
cprR	ANRYDVILLD[+576.3]IMLPR	793.454	light	0.9598	0.9914	70.22	-11.2	57628540	20.2847	II M
cprR	ANRYDVILLD[+582.4]IMLPR	795.457	heavy	0.9572	0.8995	70.48	-7.2	2985709	18.7915	I C
cprR	ANRYDVILLD[+582.4]IMLPR	795.457	heavy	0.9654	0.9078	70.28	-11.7	2929896	16.9179	I M
cprR	ANRYDVILLD[+582.4]IMLPR	795.457	heavy	0.9565	0.8917	70.56	-10.7	1807268	21.6629	II C
cprR	ANRYDVILLD[+582.4]IMLPR	795.457	heavy	0.9598	0.9056	70.18	-10.7	2840986	20.2847	II M
gacA	ELKPDVVLMD[+576.3]VK	654.712	light	0.9971	0.9922	51.68	-4.5	133828080	1.1846	I C
gacA	ELKPDVVLMD[+576.3]VK	654.712	light	0.9991	0.9656	51.64	-6.7	14878656	0.6168	I M
gacA	ELKPDVVLMD[+576.3]VK	654.712	light	0.9969	0.9865	51.75	-7.2	97952552	1.1354	II C
gacA	ELKPDVVLMD[+576.3]VK	654.712	light	0.9981	0.971	51.57	-6.6	13556238	1.5185	II M
gacA	ELKPDVVLMD[+582.4]VK	656.714	heavy	0.9971	0.963	51.68	-5.1	112971312	1.1846	I C
gacA	ELKPDVVLMD[+582.4]VK	656.714	heavy	0.9991	0.9588	51.64	-6.7	24122562	0.6168	I M
gacA	ELKPDVVLMD[+582.4]VK	656.714	heavy	0.9969	0.9608	51.75	-7.8	86275072	1.1354	II C
gacA	ELKPDVVLMD[+582.4]VK	656.714	heavy	0.9981	0.9734	51.57	-5.6	8927190	1.5185	II M
parR	GDAAFAAFLDFKPQVVVLD[+576.3]LMLPGQNGLQVC[+57.0]R	1017.29	light	0.9947	0.9681	89.5	-5.4	52227748	2.5128	I C
parR	GDAAFAAFLDFKPQVVVLD[+576.3]LMLPGQNGLQVC[+57.0]R	1017.29	light	0.996	0.9623	89.33	-5.9	46678504	2.7818	I M
parR	GDAAFAAFLDFKPQVVVLD[+576.3]LMLPGQNGLQVC[+57.0]R	1017.29	light	0.9985	0.9679	89.55	-6.9	34294864	3.1363	II C
parR	GDAAFAAFLDFKPQVVVLD[+576.3]LMLPGQNGLQVC[+57.0]R	1017.29	light	0.9975	0.9709	89.31	-7.2	48256108	2.7654	II M
parR	GDAAFAAFLDFKPQVVVLD[+582.4]LMLPGQNGLQVC[+57.0]R	1018.8	heavy	0.9947	0.9413	89.5	-3.2	20784514	2.5128	I C
parR	GDAAFAAFLDFKPQVVVLD[+582.4]LMLPGQNGLQVC[+57.0]R	1018.8	heavy	0.996	0.961	89.33	-4.7	16779820	2.7818	I M
parR	GDAAFAAFLDFKPQVVVLD[+582.4]LMLPGQNGLQVC[+57.0]R	1018.8	heavy	0.9985	0.9673	89.55	-6.5	10934705	3.1363	II C
parR	GDAAFAAFLDFKPQVVVLD[+582.4]LMLPGQNGLQVC[+57.0]R	1018.8	heavy	0.9975	0.9661	89.31	-5.9	17450202	2.7654	II M
phoP	VSEYHHDLAVID[+576.3]LGLPGMSGLDLIR	824.945	light	0.9993	0.9951	69.55	-2.9	1513662592	1.1191	I C
phoP	VSEYHHDLAVID[+576.3]LGLPGMSGLDLIR	824.945	light	0.9994	0.986	69.37	-5.4	975459008	0.7877	I M
phoP	VSEYHHDLAVID[+576.3]LGLPGMSGLDLIR	824.945	light	0.9992	0.9919	69.59	-4.5	1306559232	1.1313	II C
phoP	VSEYHHDLAVID[+576.3]LGLPGMSGLDLIR	824.945	light	0.9988	0.9849	69.29	-5.5	811605184	1.193	II M
phoP	VSEYHHDLAVID[+582.4]LGLPGMSGLDLIR	826.447	heavy	0.9993	0.9859	69.55	-2.1	1352551808	1.1191	I C
phoP	VSEYHHDLAVID[+582.4]LGLPGMSGLDLIR	826.447	heavy	0.9994	0.9857	69.37	-3.4	1238373120	0.7877	I M
phoP	VSEYHHDLAVID[+582.4]LGLPGMSGLDLIR	826.447	heavy	0.9992	0.9876	69.59	-3.9	1154920576	1.1313	II C
phoP	VSEYHHDLAVID[+582.4]LGLPGMSGLDLIR	826.447	heavy	0.9988	0.9767	69.29	-5	680293760	1.193	II M
PROCAL Peptides	YSAHEEHHYDK	708.302	light	#N/A	0.9899	12.94	-1.3	107103144	#N/A	I C
PROCAL Peptides	HEHISSDYAGK	622.289	light	#N/A	#N/A	14.06	0	#N/A	#N/A	I C
PROCAL Peptides	TFAHTESHISK	629.315	light	#N/A	#N/A	14.5	0	#N/A	#N/A	I C
PROCAL Peptides	ISLGEHEGGGK	542.275	light	#N/A	#N/A	15.49	0	#N/A	#N/A	I C
PROCAL Peptides	LSSGYDGTSYK	589.272	light	#N/A	0.9894	19.04	-0.1	229444944	#N/A	I C
PROCAL Peptides	TASGVGGFSTK	506.259	light	#N/A	#N/A	18.32	0.3	#N/A	#N/A	I C
PROCAL Peptides	FGTGTYAGGEK	544.256	light	#N/A	#N/A	18.02	-0.2	#N/A	#N/A	I C
PROCAL Peptides	VGASTGYSGLK	520.275	light	#N/A	#N/A	19.23	-0.1	#N/A	#N/A	I C
PROCAL Peptides	SYASDFGSSAK	560.251	light	#N/A	#N/A	21.18	0.4	#N/A	#N/A	I C
PROCAL Peptides	TLIAYDDSSTK	607.301	light	#N/A	#N/A	26.94	0.1	#N/A	#N/A	I C
PROCAL Peptides	LYSYYSSTESK	664.306	light	#N/A	#N/A	24.08	-0.1	#N/A	#N/A	I C
PROCAL Peptides	LYTGAGYDEVK	608.298	light	#N/A	#N/A	26.43	0.7	#N/A	#N/A	I C
PROCAL Peptides	HLTGLTFDTYK	648.335	light	#N/A	#N/A	34.68	-0.3	#N/A	#N/A	I C
PROCAL Peptides	GFLDYESTGAK	594.283	light	#N/A	#N/A	35.82	-0.4	#N/A	#N/A	I C
PROCAL Peptides	FLASSEGGFTK	572.288	light	#N/A	0.9874	28.69	0.1	1126402944	#N/A	I C
PROCAL Peptides	YALDSYSLSSK	617.304	light	#N/A	#N/A	35.64	-0.6	#N/A	#N/A	I C
PROCAL Peptides	FVGTEYDGLAK	600.301	light	#N/A	#N/A	33	0.3	#N/A	#N/A	I C
PROCAL Peptides	HFALFSTDVTK	633.33	light	#N/A	#N/A	39.49	-1.7	#N/A	#N/A	I C
PROCAL Peptides	HDTVFGSYLYK	665.327	light	#N/A	#N/A	37.66	0	#N/A	#N/A	I C
PROCAL Peptides	ALFSSITDSEK	599.304	light	#N/A	#N/A	37.95	0.2	#N/A	#N/A	I C
PROCAL Peptides	YFGYTSDTFGK	643.29	light	#N/A	#N/A	39.75	-0.1	#N/A	#N/A	I C
PROCAL Peptides	TFTGTTDSFFK	626.298	light	#N/A	#N/A	42.13	-1	#N/A	#N/A	I C
PROCAL Peptides	VSGFSDISIYK	608.316	light	#N/A	#N/A	43.27	0.3	#N/A	#N/A	I C
PROCAL Peptides	TFGTETFDTFK	647.304	light	#N/A	#N/A	44.63	0	#N/A	#N/A	I C
PROCAL Peptides	FLFTGYDTSVK	639.324	light	#N/A	#N/A	46.58	0.6	#N/A	#N/A	I C
PROCAL Peptides	ASDLLSGYYIK	615.324	light	#N/A	#N/A	45.8	0.3	#N/A	#N/A	I C
PROCAL Peptides	GIFGAFTDDYK	617.293	light	#N/A	#N/A	51.38	0.3	#N/A	#N/A	I C
PROCAL Peptides	TSIDSFIDSYK	638.309	light	#N/A	0.9758	49.28	-1.3	727652800	#N/A	I C
PROCAL Peptides	VYAETLSGFIK	614.335	light	#N/A	#N/A	46.87	-0.3	#N/A	#N/A	I C
PROCAL Peptides	GFVIDDGLITK	589.327	light	#N/A	#N/A	49.29	0.8	#N/A	#N/A	I C
PROCAL Peptides	GASDFLSFAVK	571.298	light	#N/A	#N/A	53.58	1	#N/A	#N/A	I C
PROCAL Peptides	VSSIFFDTFDK	653.322	light	#N/A	#N/A	55.93	1.1	#N/A	#N/A	I C
PROCAL Peptides	FFLTGTSIFVK	630.355	light	#N/A	#N/A	60.19	3.4	#N/A	#N/A	I C
PROCAL Peptides	GDFTFFIDTFK	669.324	light	#N/A	0.9824	69.88	-2.6	917241856	#N/A	I C
PROCAL Peptides	IDVYILALLLK	637.41	light	#N/A	#N/A	82.91	1.8	#N/A	#N/A	I C
PROCAL Peptides	FLISLLEEYFK	701.387	light	#N/A	#N/A	81.77	0.7	#N/A	#N/A	I C
PROCAL Peptides	LFISALVDFFK	650.371	light	#N/A	#N/A	82.87	2.1	#N/A	#N/A	I C
PROCAL Peptides	SILAFLYLYFK	689.394	light	#N/A	#N/A	86.54	0.5	#N/A	#N/A	I C
PROCAL Peptides	SLFFIIDGFVK	643.363	light	#N/A	#N/A	76.89	0.8	#N/A	#N/A	I C
PROCAL Peptides	SLIFFLSTLLK	641.394	light	#N/A	#N/A	85.4	1.4	#N/A	#N/A	I C
PROCAL Peptides	YSAHEEHHYDK	708.302	light	#N/A	0.9833	12.92	-0.6	31596846	#N/A	I M
PROCAL Peptides	HEHISSDYAGK	622.289	light	#N/A	#N/A	14.13	-0.5	#N/A	#N/A	I M
PROCAL Peptides	TFAHTESHISK	629.315	light	#N/A	#N/A	14.57	0.1	#N/A	#N/A	I M
PROCAL Peptides	ISLGEHEGGGK	542.275	light	#N/A	#N/A	15.64	0.4	#N/A	#N/A	I M
PROCAL Peptides	LSSGYDGTSYK	589.272	light	#N/A	0.9882	19.16	0	286914368	#N/A	I M
PROCAL Peptides	TASGVGGFSTK	506.259	light	#N/A	#N/A	18.43	0.4	#N/A	#N/A	I M
PROCAL Peptides	FGTGTYAGGEK	544.256	light	#N/A	#N/A	18.21	0.2	#N/A	#N/A	I M
PROCAL Peptides	VGASTGYSGLK	520.275	light	#N/A	#N/A	19.38	0	#N/A	#N/A	I M
PROCAL Peptides	SYASDFGSSAK	560.251	light	#N/A	#N/A	21.22	0.4	#N/A	#N/A	I M
PROCAL Peptides	TLIAYDDSSTK	607.301	light	#N/A	#N/A	26.9	-0.3	#N/A	#N/A	I M
PROCAL Peptides	LYSYYSSTESK	664.306	light	#N/A	#N/A	24.04	0.2	#N/A	#N/A	I M
PROCAL Peptides	LYTGAGYDEVK	608.298	light	#N/A	#N/A	26.39	0.8	#N/A	#N/A	I M
PROCAL Peptides	HLTGLTFDTYK	648.335	light	#N/A	#N/A	34.65	0	#N/A	#N/A	I M
PROCAL Peptides	GFLDYESTGAK	594.283	light	#N/A	#N/A	35.79	0.1	#N/A	#N/A	I M
PROCAL Peptides	FLASSEGGFTK	572.288	light	#N/A	0.9741	28.63	-0.2	1293451648	#N/A	I M
PROCAL Peptides	YALDSYSLSSK	617.304	light	#N/A	#N/A	35.6	0.1	#N/A	#N/A	I M
PROCAL Peptides	FVGTEYDGLAK	600.301	light	#N/A	#N/A	33	-0.1	#N/A	#N/A	I M
PROCAL Peptides	HFALFSTDVTK	633.33	light	#N/A	#N/A	39.49	0.1	#N/A	#N/A	I M
PROCAL Peptides	HDTVFGSYLYK	665.327	light	#N/A	#N/A	37.66	0	#N/A	#N/A	I M
PROCAL Peptides	ALFSSITDSEK	599.304	light	#N/A	#N/A	37.95	-0.3	#N/A	#N/A	I M
PROCAL Peptides	YFGYTSDTFGK	643.29	light	#N/A	#N/A	39.75	-0.1	#N/A	#N/A	I M
PROCAL Peptides	TFTGTTDSFFK	626.298	light	#N/A	#N/A	42.1	0	#N/A	#N/A	I M
PROCAL Peptides	VSGFSDISIYK	608.316	light	#N/A	#N/A	43.27	0	#N/A	#N/A	I M
PROCAL Peptides	TFGTETFDTFK	647.304	light	#N/A	#N/A	44.59	0.2	#N/A	#N/A	I M
PROCAL Peptides	FLFTGYDTSVK	639.324	light	#N/A	#N/A	46.61	1	#N/A	#N/A	I M
PROCAL Peptides	ASDLLSGYYIK	615.324	light	#N/A	#N/A	45.77	2.5	#N/A	#N/A	I M
PROCAL Peptides	GIFGAFTDDYK	617.293	light	#N/A	#N/A	51.31	1	#N/A	#N/A	I M
PROCAL Peptides	TSIDSFIDSYK	638.309	light	#N/A	0.9833	49.26	-0.1	714661056	#N/A	I M
PROCAL Peptides	VYAETLSGFIK	614.335	light	#N/A	#N/A	46.87	2.3	#N/A	#N/A	I M
PROCAL Peptides	GFVIDDGLITK	589.327	light	#N/A	#N/A	49.25	-1.5	#N/A	#N/A	I M
PROCAL Peptides	GASDFLSFAVK	571.298	light	#N/A	#N/A	53.29	1.3	#N/A	#N/A	I M
PROCAL Peptides	VSSIFFDTFDK	653.322	light	#N/A	#N/A	55.93	1.3	#N/A	#N/A	I M
PROCAL Peptides	FFLTGTSIFVK	630.355	light	#N/A	#N/A	60.08	2.3	#N/A	#N/A	I M
PROCAL Peptides	GDFTFFIDTFK	669.324	light	#N/A	0.9847	69.77	-4.6	864851264	#N/A	I M
PROCAL Peptides	IDVYILALLLK	637.41	light	#N/A	#N/A	82.87	0.4	#N/A	#N/A	I M
PROCAL Peptides	FLISLLEEYFK	701.387	light	#N/A	#N/A	81.29	0.1	#N/A	#N/A	I M
PROCAL Peptides	LFISALVDFFK	650.371	light	#N/A	#N/A	82.65	0.3	#N/A	#N/A	I M
PROCAL Peptides	SILAFLYLYFK	689.394	light	#N/A	#N/A	86.28	0.5	#N/A	#N/A	I M
PROCAL Peptides	SLFFIIDGFVK	643.363	light	#N/A	#N/A	76.78	0.5	#N/A	#N/A	I M
PROCAL Peptides	SLIFFLSTLLK	641.394	light	#N/A	#N/A	85.04	1.2	#N/A	#N/A	I M
PROCAL Peptides	YSAHEEHHYDK	708.302	light	#N/A	0.9808	12.87	-0.6	60234072	#N/A	II C
PROCAL Peptides	HEHISSDYAGK	622.289	light	#N/A	#N/A	14.02	-0.2	#N/A	#N/A	II C
PROCAL Peptides	TFAHTESHISK	629.315	light	#N/A	#N/A	14.47	0	#N/A	#N/A	II C
PROCAL Peptides	ISLGEHEGGGK	542.275	light	#N/A	#N/A	15.46	0.2	#N/A	#N/A	II C
PROCAL Peptides	LSSGYDGTSYK	589.272	light	#N/A	0.9853	18.98	0	271033952	#N/A	II C
PROCAL Peptides	TASGVGGFSTK	506.259	light	#N/A	#N/A	18.22	0.3	#N/A	#N/A	II C
PROCAL Peptides	FGTGTYAGGEK	544.256	light	#N/A	#N/A	18	0.1	#N/A	#N/A	II C
PROCAL Peptides	VGASTGYSGLK	520.275	light	#N/A	#N/A	19.21	-0.2	#N/A	#N/A	II C
PROCAL Peptides	SYASDFGSSAK	560.251	light	#N/A	#N/A	21.16	0.3	#N/A	#N/A	II C
PROCAL Peptides	TLIAYDDSSTK	607.301	light	#N/A	#N/A	26.94	0.1	#N/A	#N/A	II C
PROCAL Peptides	LYSYYSSTESK	664.306	light	#N/A	#N/A	24.03	0.1	#N/A	#N/A	II C
PROCAL Peptides	LYTGAGYDEVK	608.298	light	#N/A	#N/A	26.43	1	#N/A	#N/A	II C
PROCAL Peptides	HLTGLTFDTYK	648.335	light	#N/A	#N/A	34.74	0.3	#N/A	#N/A	II C
PROCAL Peptides	GFLDYESTGAK	594.283	light	#N/A	#N/A	35.88	-0.3	#N/A	#N/A	II C
PROCAL Peptides	FLASSEGGFTK	572.288	light	#N/A	0.9767	28.7	0.1	1132636288	#N/A	II C
PROCAL Peptides	YALDSYSLSSK	617.304	light	#N/A	#N/A	51.41	-9.6	#N/A	#N/A	II C
PROCAL Peptides	FVGTEYDGLAK	600.301	light	#N/A	#N/A	33.01	0.3	#N/A	#N/A	II C
PROCAL Peptides	HFALFSTDVTK	633.33	light	#N/A	#N/A	39.6	-0.6	#N/A	#N/A	II C
PROCAL Peptides	HDTVFGSYLYK	665.327	light	#N/A	#N/A	37.72	-0.2	#N/A	#N/A	II C
PROCAL Peptides	ALFSSITDSEK	599.304	light	#N/A	#N/A	38.02	-0.1	#N/A	#N/A	II C
PROCAL Peptides	YFGYTSDTFGK	643.29	light	#N/A	#N/A	39.82	0	#N/A	#N/A	II C
PROCAL Peptides	TFTGTTDSFFK	626.298	light	#N/A	#N/A	42.18	-0.5	#N/A	#N/A	II C
PROCAL Peptides	VSGFSDISIYK	608.316	light	#N/A	#N/A	43.32	-0.3	#N/A	#N/A	II C
PROCAL Peptides	TFGTETFDTFK	647.304	light	#N/A	#N/A	44.68	-0.3	#N/A	#N/A	II C
PROCAL Peptides	FLFTGYDTSVK	639.324	light	#N/A	#N/A	46.59	1	#N/A	#N/A	II C
PROCAL Peptides	ASDLLSGYYIK	615.324	light	#N/A	#N/A	45.86	2.6	#N/A	#N/A	II C
PROCAL Peptides	GIFGAFTDDYK	617.293	light	#N/A	#N/A	51.41	0.5	#N/A	#N/A	II C
PROCAL Peptides	TSIDSFIDSYK	638.309	light	#N/A	0.9845	49.32	-0.8	784405504	#N/A	II C
PROCAL Peptides	VYAETLSGFIK	614.335	light	#N/A	#N/A	46.89	0.2	#N/A	#N/A	II C
PROCAL Peptides	GFVIDDGLITK	589.327	light	#N/A	#N/A	49.31	-0.4	#N/A	#N/A	II C
PROCAL Peptides	GASDFLSFAVK	571.298	light	#N/A	#N/A	53.47	2.2	#N/A	#N/A	II C
PROCAL Peptides	VSSIFFDTFDK	653.322	light	#N/A	#N/A	56.01	0.9	#N/A	#N/A	II C
PROCAL Peptides	FFLTGTSIFVK	630.355	light	#N/A	#N/A	60.32	2.5	#N/A	#N/A	II C
PROCAL Peptides	GDFTFFIDTFK	669.324	light	#N/A	0.986	69.85	-3.4	1014659008	#N/A	II C
PROCAL Peptides	IDVYILALLLK	637.41	light	#N/A	#N/A	82.99	1.7	#N/A	#N/A	II C
PROCAL Peptides	FLISLLEEYFK	701.387	light	#N/A	#N/A	81.85	1.4	#N/A	#N/A	II C
PROCAL Peptides	LFISALVDFFK	650.371	light	#N/A	#N/A	82.95	1.7	#N/A	#N/A	II C
PROCAL Peptides	SILAFLYLYFK	689.394	light	#N/A	#N/A	86.74	0.8	#N/A	#N/A	II C
PROCAL Peptides	SLFFIIDGFVK	643.363	light	#N/A	#N/A	77.06	0.7	#N/A	#N/A	II C
PROCAL Peptides	SLIFFLSTLLK	641.394	light	#N/A	#N/A	85.49	1.8	#N/A	#N/A	II C
PROCAL Peptides	YSAHEEHHYDK	708.302	light	#N/A	0.9867	12.98	-1.6	137058320	#N/A	II M
PROCAL Peptides	HEHISSDYAGK	622.289	light	#N/A	#N/A	14.13	0.1	#N/A	#N/A	II M
PROCAL Peptides	TFAHTESHISK	629.315	light	#N/A	#N/A	14.57	0.2	#N/A	#N/A	II M
PROCAL Peptides	ISLGEHEGGGK	542.275	light	#N/A	#N/A	15.67	0.3	#N/A	#N/A	II M
PROCAL Peptides	LSSGYDGTSYK	589.272	light	#N/A	0.9759	19.15	0.1	225353280	#N/A	II M
PROCAL Peptides	TASGVGGFSTK	506.259	light	#N/A	#N/A	18.46	0.6	#N/A	#N/A	II M
PROCAL Peptides	FGTGTYAGGEK	544.256	light	#N/A	#N/A	18.17	0.1	#N/A	#N/A	II M
PROCAL Peptides	VGASTGYSGLK	520.275	light	#N/A	#N/A	19.42	-0.1	#N/A	#N/A	II M
PROCAL Peptides	SYASDFGSSAK	560.251	light	#N/A	#N/A	21.11	-0.2	#N/A	#N/A	II M
PROCAL Peptides	TLIAYDDSSTK	607.301	light	#N/A	#N/A	26.46	-0.1	#N/A	#N/A	II M
PROCAL Peptides	LYSYYSSTESK	664.306	light	#N/A	#N/A	23.89	0	#N/A	#N/A	II M
PROCAL Peptides	LYTGAGYDEVK	608.298	light	#N/A	#N/A	26.24	0.2	#N/A	#N/A	II M
PROCAL Peptides	HLTGLTFDTYK	648.335	light	#N/A	#N/A	34.21	0.3	#N/A	#N/A	II M
PROCAL Peptides	GFLDYESTGAK	594.283	light	#N/A	#N/A	35.64	-0.2	#N/A	#N/A	II M
PROCAL Peptides	FLASSEGGFTK	572.288	light	#N/A	0.9812	28.47	0.1	1098473216	#N/A	II M
PROCAL Peptides	YALDSYSLSSK	617.304	light	#N/A	#N/A	35.53	-0.2	#N/A	#N/A	II M
PROCAL Peptides	FVGTEYDGLAK	600.301	light	#N/A	#N/A	32.85	0	#N/A	#N/A	II M
PROCAL Peptides	HFALFSTDVTK	633.33	light	#N/A	#N/A	39.09	-0.1	#N/A	#N/A	II M
PROCAL Peptides	HDTVFGSYLYK	665.327	light	#N/A	#N/A	37.29	-0.5	#N/A	#N/A	II M
PROCAL Peptides	ALFSSITDSEK	599.304	light	#N/A	#N/A	37.77	0.2	#N/A	#N/A	II M
PROCAL Peptides	YFGYTSDTFGK	643.29	light	#N/A	#N/A	39.6	-0.4	#N/A	#N/A	II M
PROCAL Peptides	TFTGTTDSFFK	626.298	light	#N/A	#N/A	41.95	-0.2	#N/A	#N/A	II M
PROCAL Peptides	VSGFSDISIYK	608.316	light	#N/A	#N/A	43.16	2.8	#N/A	#N/A	II M
PROCAL Peptides	TFGTETFDTFK	647.304	light	#N/A	#N/A	44.48	0.8	#N/A	#N/A	II M
PROCAL Peptides	FLFTGYDTSVK	639.324	light	#N/A	#N/A	46.47	2.2	#N/A	#N/A	II M
PROCAL Peptides	ASDLLSGYYIK	615.324	light	#N/A	#N/A	45.62	4.3	#N/A	#N/A	II M
PROCAL Peptides	GIFGAFTDDYK	617.293	light	#N/A	#N/A	51.16	0.5	#N/A	#N/A	II M
PROCAL Peptides	TSIDSFIDSYK	638.309	light	#N/A	0.9796	49.17	0.3	792464640	#N/A	II M
PROCAL Peptides	VYAETLSGFIK	614.335	light	#N/A	#N/A	46.72	2.3	#N/A	#N/A	II M
PROCAL Peptides	GFVIDDGLITK	589.327	light	#N/A	#N/A	49.14	1.9	#N/A	#N/A	II M
PROCAL Peptides	GASDFLSFAVK	571.298	light	#N/A	#N/A	53.18	1.8	#N/A	#N/A	II M
PROCAL Peptides	VSSIFFDTFDK	653.322	light	#N/A	#N/A	55.82	1.1	#N/A	#N/A	II M
PROCAL Peptides	FFLTGTSIFVK	630.355	light	#N/A	#N/A	60.01	1.3	#N/A	#N/A	II M
PROCAL Peptides	GDFTFFIDTFK	669.324	light	#N/A	0.9799	69.69	-4.4	792201344	#N/A	II M
PROCAL Peptides	IDVYILALLLK	637.41	light	#N/A	#N/A	83.42	0.4	#N/A	#N/A	II M
PROCAL Peptides	FLISLLEEYFK	701.387	light	#N/A	#N/A	81.22	-0.6	#N/A	#N/A	II M
PROCAL Peptides	LFISALVDFFK	650.371	light	#N/A	#N/A	82.5	-0.3	#N/A	#N/A	II M
PROCAL Peptides	SILAFLYLYFK	689.394	light	#N/A	#N/A	86.17	-1.3	#N/A	#N/A	II M
PROCAL Peptides	SLFFIIDGFVK	643.363	light	#N/A	#N/A	76.74	0.5	#N/A	#N/A	II M
PROCAL Peptides	SLIFFLSTLLK	641.394	light	#N/A	#N/A	84.89	-1.6	#N/A	#N/A	II M
